# Supplementary material for: Palladium-catalyzed aza-Wacker cyclization of O-homoallyl benzimidates: expeditious access to heteroatom-rich substituted 1,3-oxazines via alkene trifunctionalization
Source: Royal Society of Chemistry journal article supplement (doi:10.1039/d2qo01233b), 2022-01-01

# Supporting Information

## **Palladium-catalyzed *aza*-Wacker cyclization of *O*-homoallyl benzimidates: expeditious access to heteroatom-rich substituted 1,3-oxazines via alkene trifunctionalization**

Linlin Zhang<sup>†</sup>, Lin Qi<sup>\*,†</sup>, Hui-Jie Du<sup>†</sup>, Jia-Li Liu<sup>†</sup>, Tong-Yang Cao<sup>†</sup>, Zhi-Min Yan<sup>†</sup>, Wei Li<sup>\*,†,‡</sup>, and Li-Jing Wang<sup>\*,†,‡</sup>

<sup>†</sup>College of Chemistry & Environmental Science, Hebei University, 180 Wusi Donglu, Baoding 071002, P. R. China.

<sup>‡</sup>Key Laboratory of Medicinal Chemistry, and Molecular Diagnosis of the Ministry of Education, Key Laboratory of Chemical Biology of Hebei Province, Hebei University, 180 Wusi Donglu, Baoding 071002, P. R. China.

### Table of Contents

|                                                                                                               |            |
|---------------------------------------------------------------------------------------------------------------|------------|
| <b>1 General experimental procedures</b>                                                                      | <b>S2</b>  |
| <b>2 Starting materials</b>                                                                                   | <b>S2</b>  |
| <b>3 The typical procedure for the preparation of product 2a</b>                                              | <b>S3</b>  |
| <b>4 Procedures for the formation of 2a (5 mmol scale), 3, 4, 5, 6 and 7</b>                                  | <b>S3</b>  |
| <b>5 Scheme S1</b>                                                                                            | <b>S6</b>  |
| <b>6 Characterization Data of 1g, 1m-1p, 1s, and 1u-1y</b>                                                    | <b>S6</b>  |
| <b>7 Characterization Data of 2a-2y, 2aa, 3, 4, 5, 6 and 7</b>                                                | <b>S9</b>  |
| <b>8 The <sup>1</sup>H, <sup>13</sup>C, and <sup>19</sup>F spectra of new starting materials and products</b> | <b>S25</b> |

## General experimental procedures

Reaction progress was monitored via thin layer chromatography (TLC) performed on GF254 silica gel plates. Column chromatography was carried out with silica gel (200-300 mesh) or aluminum oxide (200-300 mesh).  $^1\text{H}$  NMR spectra were recorded on 400 MHz or 600 MHz in  $\text{CDCl}_3$ ,  $^{13}\text{C}$  NMR spectra were recorded on 100 MHz or 150 MHz in  $\text{CDCl}_3$ , and  $^{19}\text{F}$  NMR spectra were recorded on 564 MHz in  $\text{CDCl}_3$ . Chemical shifts (ppm) were recorded with tetramethylsilane (TMS) as the internal reference standard. Multiplicities are given as: s (singlet), d (doublet), t (triplet), q (quartet), dd (doublet of doublets), and m (multiplet). The new starting materials **1** and all products **2**, **3**, **4**, **5**, **6**, and **7** were further characterized by high-resolution MS (TLQ) (ESI ionization sources); copies of their  $^1\text{H}$  NMR,  $^{13}\text{C}$  NMR, and  $^{19}\text{F}$  NMR spectra are provided in the Supporting Information. Commercial grade solvents and reagents were used without further purification.

## Starting materials

The *O*-homoallyl-benzimidates **1a-s** and **1ee** were synthesized according to literature procedures<sup>1</sup>.

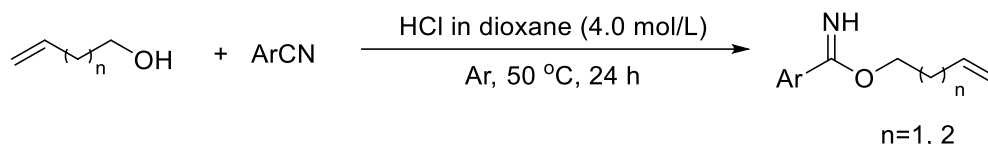

A mixture of aromatic cyanide (10 mmol, 2.0 equiv) in 4 M HCl in dioxane (12.5 mL, 50 mmol, 10.0 equiv) was stirred under argon at room temperature. After 1 h, corresponding but-3-en-1-ol (5 mmol, 1.0 equiv) was added dropwise and stirred for 24 hours at 50 °C. After being cooled again to room temperature, the mixture was concentrated in vacuo. The residue was dissolved in DCM (35 mL) and washed with Sat.  $\text{NaHCO}_3$  (35 mL). The aqueous layer was extracted with DCM (3 x 35 mL). The combined organic phase was washed with brine (35 mL) and dried over anhydrous  $\text{Na}_2\text{SO}_4$ , concentrated, and purified by silica gel column chromatography in petroleum ethyl acetate (5:1) to afford the desired product.

Preparation of *O*-homoallyl-benzimidates **1t-1z**, and **1aa**<sup>1</sup>.

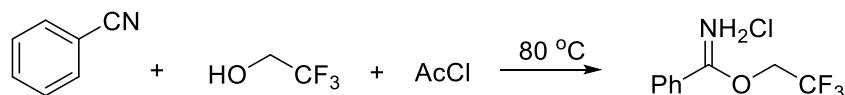

To a pressure tube equipped with a stir bar was added nitrile (1.0 equiv), trifluoroethanol (12.0 equiv), and acetyl chloride (8.0 equiv). The solution was heated to 80 °C and stirred. After 48 h the reaction was cooled to room temperature and carefully vented (Note: HCl gas is formed as a by-product, see below for additional instructions on safe handling), which immediately induced precipitation of the benzimidate hydrochloride salt. The benzimidate salt was collected via filtration with cold hexanes.

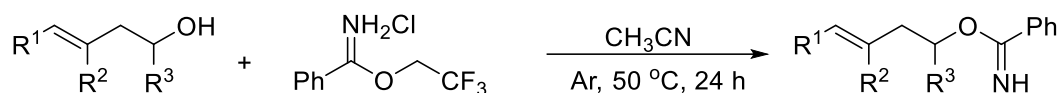

A mixture of corresponding alcohol (5 mmol, 1.0 equiv) and 2,2,2-trifluoroethyl benzimidate hydrochloride (8 mmol, 1.6 equiv) in acetonitrile was stirred under argon at 50 °C for 24 hours. The mixture was cooled to room temperature and diluted in dichloromethane, washed with NaHCO<sub>3</sub> and brine. The organic layer was separated, dried over Na<sub>2</sub>SO<sub>4</sub>, filtered, and concentrated in vacuo. The resulting residue was purified by chromatography on silica gel (10-40% EtOAc in hexanes) to give the desired product.

The *O*-homoallyl trichloroacetimidate **1bb**, *N*-(but-3-en-1-yl)-*N*-phenylbenzimidamide **1cc**, and 1-phenylhex-5-en-1-imine **1dd** were synthesized according to literature procedures<sup>1</sup>.

### The typical procedure for the preparation of product 2a

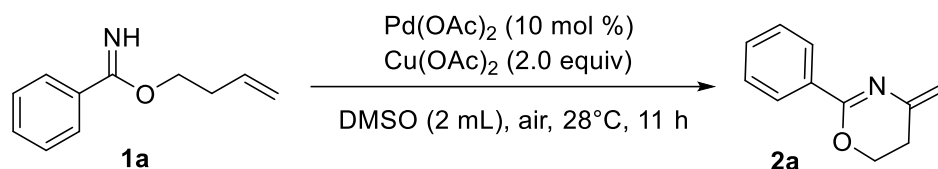

2 mL DMSO was added to 0.3 mmol **1a**, 0.1 equiv Pd(OAc)<sub>2</sub> and 2.0 equiv Cu(OAc)<sub>2</sub> under air atmosphere. The mixture was stirred for 11 h at 28 °C. After the reaction finished as indicated by TLC, the reaction mixture was quenched by water and extracted with ethyl acetate (3 x 25 mL). The combined organic layers were washed with H<sub>2</sub>O (1 x 25 mL) and saturated brine (1 x 25 mL), dried over Na<sub>2</sub>SO<sub>4</sub>, concentrated in vacuo, and purified by chromatography on silica gel (elute: EtOAc/Petroleum ether 1/50-1/10, v/v) to give the desired product **2a** (86%).

### 5 mmol scale reaction for the preparation of product 2a

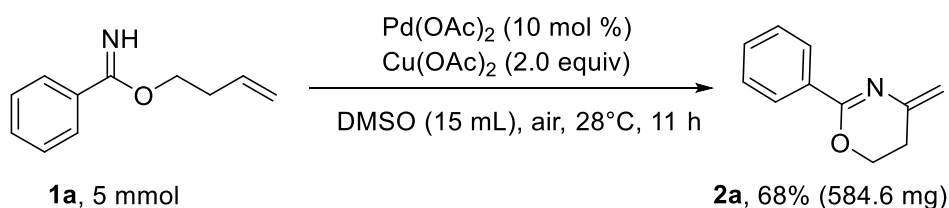

15 mL DMSO was added to 5.0 mmol **1a**, 0.1 equiv Pd(OAc)<sub>2</sub> and 2.0 equiv Cu(OAc)<sub>2</sub> under air atmosphere. The mixture was stirred for 11 h at 28 °C. After the reaction finished as indicated by TLC, the reaction mixture was extracted with ethyl acetate (3 x 25 mL). The combined organic layers were washed with H<sub>2</sub>O (1 x 25 mL) and saturated brine (1 x 25 mL), dried over Na<sub>2</sub>SO<sub>4</sub>, concentrated in vacuo, and purified by chromatography on silica gel (elute: EtOAc/Petroleum ether 1/50-1/10, v/v) to give the desired product **2a** (68%).

### Procedures for the formation of 3<sup>2</sup>, 4, 5, 6<sup>2</sup>, and 7.

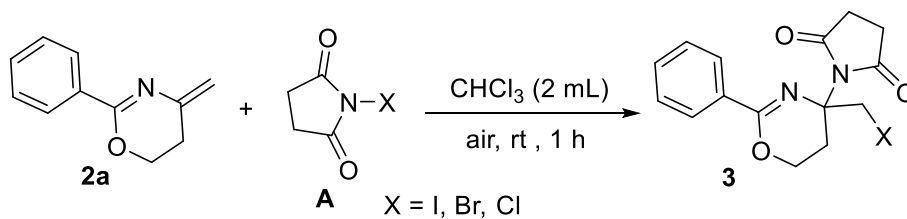

The 4-methylene-1,3-oxazine **2a** (0.2 mmol) and **A** (2.0 equiv) were dissolved in  $\text{CHCl}_3$  (2 mL) and stirred at room temperature. Upon completion indicated by TLC, the reaction mixture was quenched with water (25 mL) and extracted with ethyl acetate (3 x 25 mL). The combined organic layers were washed with saturated brine (25 mL), dried over  $\text{Na}_2\text{SO}_4$ , concentrated in vacuo, and purified by chromatography on silica gel (elute: EtOAc/Petroleum ether 1/10-1/3, v/v) to give the pure product **3**.

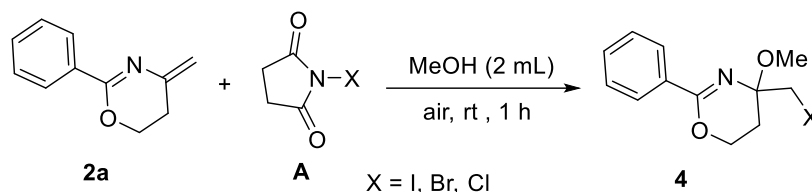

The 4-methylene-1,3-oxazine **2a** (0.2 mmol) and **A** (2.0 equiv) were dissolved in MeOH (2 mL). The mixture was stirred for 1 h at room temperature. Upon completion indicated by TLC, the reaction mixture was quenched with water (25 mL) and extracted with ethyl acetate (3 x 25 mL). The combined organic layers were washed with saturated brine (25 mL), dried over  $\text{Na}_2\text{SO}_4$ , concentrated in vacuo, and purified by chromatography on silica gel (elute: EtOAc/Petroleum ether 1/50-1/20, v/v) to give the pure product **4**.

**Methods A** (synthesis of **5a-5b**):

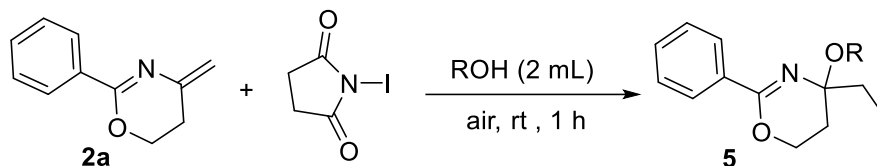

The 4-methylene-1,3-oxazine **2a** (0.2 mmol) and *N*-iodosuccinimide (2.0 equiv) were dissolved in the corresponding alcohol solvent (2 mL). The mixture was stirred for 1 h at room temperature. Upon completion indicated by TLC, the reaction mixture was quenched by water (25 mL) and extracted with ethyl acetate (3 x 25 mL). The combined organic layers were washed with saturated brine (25 mL), dried over  $\text{Na}_2\text{SO}_4$ , concentrated in vacuo, and purified by chromatography on silica gel (elute: EtOAc/Petroleum ether 1/50-1/20, v/v) to give the pure products **5a-5b**.

**Methods B** (synthesis of **5c-5h**):

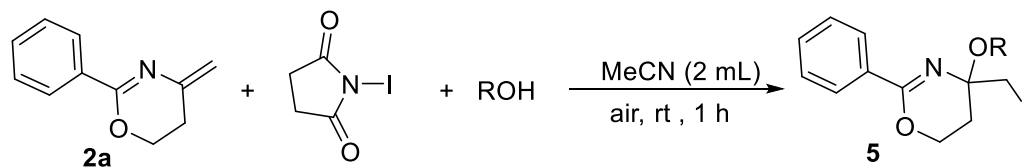

The 4-methylene-1,3-oxazine **2a** (0.2 mmol), *N*-iodosuccinimide (2.0 equiv) and

corresponding alcohol (10.0 equiv) were dissolved in MeCN solvent (2 mL). The mixture was stirred for 1 h at room temperature. Upon completion indicated by TLC, the reaction mixture was quenched by water (25 mL) and extracted with ethyl acetate (3 x 25 mL). The combined organic layers were washed with saturated brine (25 mL), dried over Na<sub>2</sub>SO<sub>4</sub>, concentrated in vacuo, and purified by chromatography on a neutral alumina oxide column (elute: EtOAc/Petroleum ether 1/50-1/20, v/v) to give the pure products **5c-5h**.

#### Methods C:

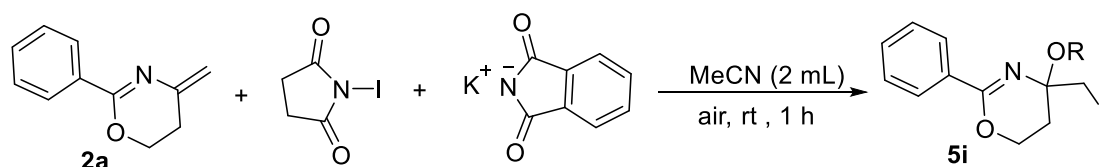

The 4-methylene-1,3-oxazine **2a** (0.2 mmol), *N*-iodosuccinimide (2.0 equiv) and potassium phthalimide (10.0 equiv) were dissolved in MeCN solvent (2 mL). The mixture was stirred for 1 h at room temperature. Upon completion indicated by TLC, the reaction mixture was quenched with water (25 mL) and extracted with ethyl acetate (3 x 25 mL). The combined organic layers were washed with saturated brine (25 mL), dried over Na<sub>2</sub>SO<sub>4</sub>, concentrated in vacuo, and purified by chromatography on a neutral alumina oxide column (elute: EtOAc/Petroleum ether 1/50-1/20, v/v) to give the pure product **5i**.

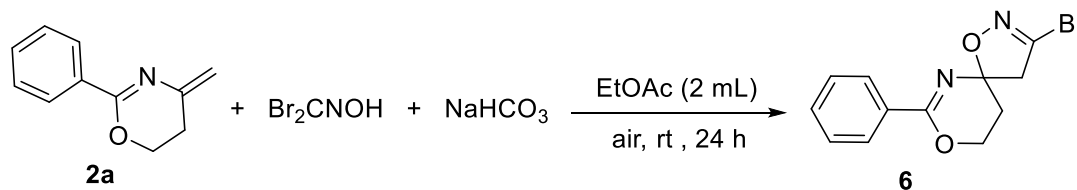

The 4-methylene-1,3-oxazine **2a** (0.2 mmol), Br<sub>2</sub>CNOH (1.1 equiv) and NaHCO<sub>3</sub> (1.5 equiv) were dissolved in ethyl acetate solvent (2 mL). The mixture was stirred for 24 h at room temperature. Upon completion indicated by TLC, the reaction mixture was quenched with water (25 mL) and extracted with ethyl acetate (3 x 25 mL). The combined organic layers were washed with saturated brine (25 mL), dried over Na<sub>2</sub>SO<sub>4</sub>, concentrated in vacuo, and purified by chromatography on silica gel (elute: EtOAc/Petroleum ether 1/50-1/10, v/v) to give the pure product **6**.

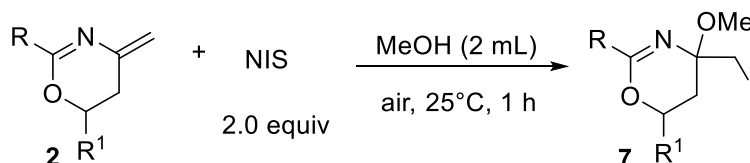

The 4-methylene-1,3-oxazines **2** (0.2 mmol) and NIS (2.0 equiv) was dissolved in MeOH (2 mL). The mixture was stirred for 1 h at 25 °C. Upon completion indicated by TLC, the reaction mixture was quenched with water (25 mL) and extracted with ethyl acetate (3 x 25 mL). The combined organic layers were washed with saturated brine (25 mL), dried over Na<sub>2</sub>SO<sub>4</sub>, concentrated in vacuo, and purified by chromatography on silica gel (elute: EtOAc/Petroleum ether 1/50-1/20, v/v) to give

the pure product **7**.

## Scheme S1

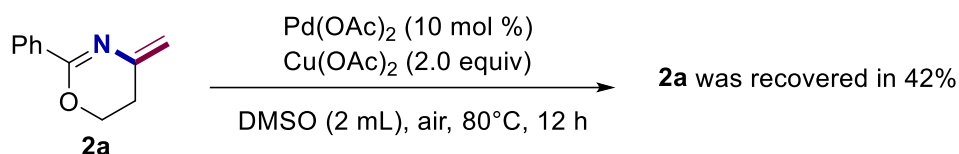

2 mL DMSO was added to 0.3 mmol **2a**, 0.1 equiv Pd(OAc)<sub>2</sub> and 2.0 equiv Cu(OAc)<sub>2</sub> under air atmosphere. The mixture was stirred for 12 h at 80°C. The reaction mixture was quenched by water and extracted with ethyl acetate (3 x 25 mL). The combined organic layers were washed with H<sub>2</sub>O (1 x 25 mL) and saturated brine (1 x 25 mL), dried over Na<sub>2</sub>SO<sub>4</sub>, concentrated in vacuo, and purified by chromatography on silica gel (elute: EtOAc/Petroleum ether 1/50-1/10, v/v) to recovered **2a** (42%).

## Characterization Data of **1g**, **1m-1p**, **1s**, and **1u-1y**

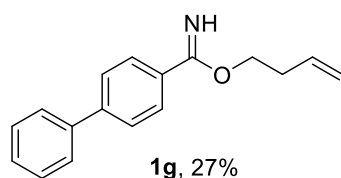

**but-3-en-1-yl [1,1'-biphenyl]-4-carbimidate (1g)**. Colorless oil (0.34 g, 27%), (EtOAc/ Petroleum ether, 1/10-1/5, v/v). <sup>1</sup>H NMR (CDCl<sub>3</sub>, 400 MHz): δ 7.81 (d, *J* = 8.4 Hz, 2H), 7.65-7.60 (m, 4H), 7.46 (t, *J* = 7.2 Hz, 2H), 7.38 (t, *J* = 7.2 Hz, 1H), 5.99-5.89 (m, 1H), 5.23-5.11 (m, 2H), 4.35 (t, *J* = 6.8 Hz, 2H), 2.59 (dd, *J* = 6.4 Hz, *J* = 6.8 Hz, 2H). <sup>13</sup>C {<sup>1</sup>H} NMR (CDCl<sub>3</sub>, 150 MHz): δ 167.5, 143.7, 140.1, 134.7, 131.5, 128.9, 127.9, 127.2, 127.2, 127.1, 117.0, 65.2, 33.2. HRMS (ESI-TLQ) *m/z*: [M + H]<sup>+</sup> calcd for C<sub>17</sub>H<sub>18</sub>NO, 252.1383; found, 252.1383.

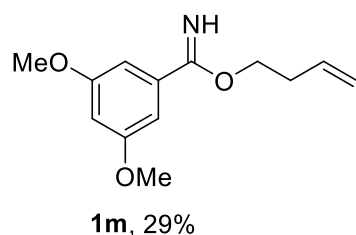

**but-3-en-1-yl 3,5-dimethoxybenzimidate (1m)**. Colorless oil (0.34 g, 29%), (EtOAc/ Petroleum ether, 1/10-1/5, v/v). <sup>1</sup>H NMR (CDCl<sub>3</sub>, 400 MHz): δ 6.87 (s, 2H), 6.55 (t, *J* = 2.4 Hz, 1H), 5.97-5.86 (m, 1H), 5.21-5.10 (m, 2H), 4.31 (t, *J* = 6.4 Hz, 2H), 3.82 (s, 6H), 2.57 (dd, *J* = 6.4 Hz, *J* = 6.8 Hz, 2H). <sup>13</sup>C {<sup>1</sup>H} NMR (CDCl<sub>3</sub>, 100 MHz): δ 160.8, 135.1, 134.8, 117.1, 105.0, 103.0, 65.3, 55.6, 33.2. HRMS (ESI-TLQ) *m/z*: [M + H]<sup>+</sup> calcd for C<sub>13</sub>H<sub>18</sub>NO<sub>3</sub>, 236.1281; found, 236.1280.

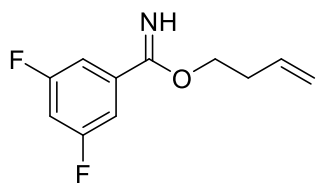

**1n**, 12%

**but-3-en-1-yl 3,5-difluorobenzimidate (1n)**. Colorless oil (0.13 g, 12%), (EtOAc/ Petroleum ether, 1/10-1/5, v/v).  $^1\text{H}$  NMR ( $\text{CDCl}_3$ , 400 MHz):  $\delta$  7.28 (d,  $J = 8.0$  Hz, 2H), 6.94-6.89 (m, 1H), 5.95-5.85 (m, 1H), 5.22-5.12 (m, 2H), 4.30 (t,  $J = 6.8$  Hz, 2H), 2.57 (dd,  $J = 6.8$  Hz,  $J = 6.8$  Hz, 2H).  $^{13}\text{C}$  { $^1\text{H}$ } NMR ( $\text{CDCl}_3$ , 100 MHz):  $\delta$  164.3 (d,  $J = 12.3$  Hz), 161.8 (d,  $J = 12.3$  Hz), 136.3, 134.4, 117.4, 110.2 (dd,  $J = 7.4$  Hz,  $J = 11.8$  Hz), 106.4 (t,  $J = 25.2$  Hz), 65.5, 33.1.  $^{19}\text{F}$  NMR ( $\text{CDCl}_3$ , 564 MHz):  $\delta$  -108.5. HRMS (ESI-TLQ)  $m/z$ :  $[\text{M} + \text{H}]^+$  calcd for  $\text{C}_{11}\text{H}_{12}\text{F}_2\text{NO}$ , 212.0881; found, 212.0881.

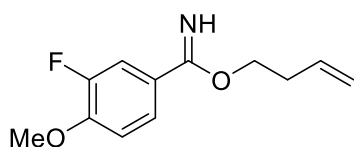

**1o**, 35%

**but-3-en-1-yl 3-fluoro-4-methoxybenzimidate (1o)**. Colorless oil (0.39 g, 35%), (EtOAc/ Petroleum ether, 1/10-1/5, v/v).  $^1\text{H}$  NMR ( $\text{CDCl}_3$ , 400 MHz):  $\delta$  7.50 (d,  $J = 12.0$  Hz, 2H), 6.97 (t,  $J = 8.8$  Hz, 1H), 5.96-5.86 (m, 1H), 5.21-5.11 (m, 2H), 4.29 (t,  $J = 6.4$  Hz, 2H), 3.93 (s, 3H), 2.56 (dd,  $J = 6.4$  Hz,  $J = 6.8$  Hz, 2H).  $^{13}\text{C}$  { $^1\text{H}$ } NMR ( $\text{CDCl}_3$ , 100 MHz):  $\delta$  166.2, 151.9 (d,  $J = 245.0$  Hz), 150.0 (d,  $J = 10.7$  Hz), 134.7, 125.7 (d,  $J = 6.1$  Hz), 123.3, 117.2, 114.9 (d,  $J = 19.9$  Hz), 112.7, 65.2, 56.3, 33.2.  $^{19}\text{F}$  NMR ( $\text{CDCl}_3$ , 564 MHz):  $\delta$  -134.4. HRMS (ESI-TLQ)  $m/z$ :  $[\text{M} + \text{H}]^+$  calcd for  $\text{C}_{12}\text{H}_{15}\text{FNO}_2$ , 224.1081; found, 224.1080.

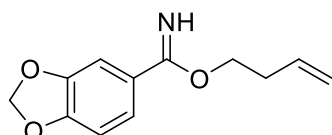

**1p**, 29%

**but-3-en-1-yl benzo[*d*][1,3]dioxole-5-carbimidate (1p)**. Colorless oil (0.33 g, 29%), (EtOAc/ Petroleum ether, 1/10-1/5, v/v).  $^1\text{H}$  NMR ( $\text{CDCl}_3$ , 400 MHz):  $\delta$  7.29 (d,  $J = 8.4$  Hz, 2H), 6.81 (d,  $J = 8.0$  Hz, 1H), 6.00 (s, 2H), 5.96-5.86 (m, 1H), 5.21-5.10 (m, 2H), 4.28 (t,  $J = 6.8$  Hz, 2H), 2.55 (dd,  $J = 6.8$  Hz,  $J = 6.4$  Hz, 2H).  $^{13}\text{C}$  { $^1\text{H}$ } NMR ( $\text{CDCl}_3$ , 100 MHz):  $\delta$  166.9, 149.8, 147.8, 134.7, 127.0, 121.5, 117.0, 108.0, 107.2, 101.7, 65.1, 33.2. HRMS (ESI-TLQ)  $m/z$ :  $[\text{M} + \text{H}]^+$  calcd for  $\text{C}_{12}\text{H}_{14}\text{NO}_3$ , 220.0968; found, 220.0967.

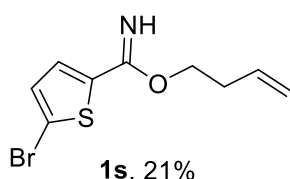

**1s**, 21%

**but-3-en-1-yl 5-bromothiophene-2-carbimidate (1s).** Yellow oil (0.53 g, 21%), (EtOAc/ Petroleum ether, 1/20-1/10, v/v).  $^1\text{H}$  NMR ( $\text{CDCl}_3$ , 400 MHz):  $\delta$  7.22 (d,  $J = 4.0$  Hz, 1H), 7.02 (d,  $J = 4.0$  Hz, 1H), 5.93-5.82 (m, 1H), 5.20-5.10 (m, 2H), 4.27 (t,  $J = 5.6$  Hz, 2H), 2.52 (dd,  $J = 6.8$  Hz,  $J = 6.8$  Hz, 2H).  $^{13}\text{C}$   $\{^1\text{H}\}$  NMR ( $\text{CDCl}_3$ , 100 MHz):  $\delta$  161.4, 137.4, 134.3, 130.6, 128.3, 117.4, 116.9, 65.3, 33.1. HRMS (ESI-TLQ)  $m/z$ :  $[\text{M} + \text{H}]^+$  calcd for  $\text{C}_9\text{H}_{11}\text{BrNOS}$ , 259.9739; found, 259.9739.

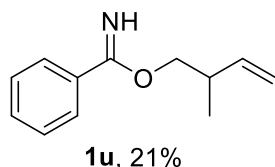

**2-methylbut-3-en-1-yl benzimidate (1u).** Yellow oil (0.20 g, 21%), (EtOAc/ Petroleum ether, 1/10-1/5, v/v).  $^1\text{H}$  NMR ( $\text{CDCl}_3$ , 600 MHz):  $\delta$  7.74 (d,  $J = 7.2$  Hz, 2H), 7.46 (t,  $J = 7.2$  Hz, 1H), 7.41 (t,  $J = 7.8$  Hz, 2H), 5.92-5.86 (m, 1H), 5.17-5.07 (m, 2H), 4.20-4.13 (m, 2H), 2.76-2.69 (m, 1H), 1.16 (d,  $J = 7.2$  Hz, 3H).  $^{13}\text{C}$   $\{^1\text{H}\}$  NMR ( $\text{CDCl}_3$ , 150 MHz):  $\delta$  167.9, 140.7, 133.0, 131.0, 128.6, 126.8, 114.8, 70.2, 37.2, 16.8. HRMS (ESI-TLQ)  $m/z$ :  $[\text{M} + \text{H}]^+$  calcd for  $\text{C}_{12}\text{H}_{16}\text{NO}$ , 190.1226; found, 190.1227.

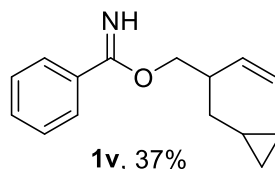

**2-(cyclopropylmethyl)but-3-en-1-yl benzimidate (1v).** Colorless oil (0.43 g, 37%), (EtOAc/ Petroleum ether, 1/10-1/5, v/v).  $^1\text{H}$  NMR ( $\text{CDCl}_3$ , 400 MHz):  $\delta$  7.73 (d,  $J = 7.2$  Hz, 2H), 7.48-7.39 (m, 3H), 5.91-5.82 (m, 1H), 5.21-5.10 (m, 2H), 4.33-4.21 (m, 2H), 2.75-2.66 (m, 1H), 1.53-1.46 (m, 1H), 1.42-1.34 (m, 1H), 0.82-0.72 (m, 1H), 0.50-0.42 (m, 2H), 0.11-0.02 (m, 2H).  $^{13}\text{C}$   $\{^1\text{H}\}$  NMR ( $\text{CDCl}_3$ , 100 MHz):  $\delta$  167.9, 139.9, 132.9, 131.0, 128.6, 126.8, 115.8, 68.7, 43.8, 36.8, 8.8, 4.9, 4.8. HRMS (ESI-TLQ)  $m/z$ :  $[\text{M} + \text{H}]^+$  calcd for  $\text{C}_{15}\text{H}_{20}\text{NO}$ , 230.1539; found, 230.1540.

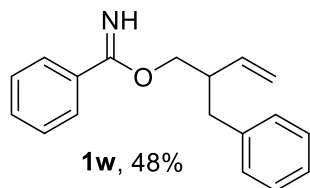

**2-benzylbut-3-en-1-yl benzimidate (1w).** Colorless oil (0.64 g, 48%), (EtOAc/ Petroleum ether, 1/10-1/5, v/v).  $^1\text{H}$  NMR ( $\text{CDCl}_3$ , 600 MHz):  $\delta$  7.72 (d,  $J = 5.4$  Hz, 2H), 7.45 (t,  $J = 7.2$  Hz, 1H), 7.41 (t,  $J = 7.8$  Hz, 2H), 7.27 (t,  $J = 7.8$  Hz, 2H), 7.18 (t,  $J = 7.2$  Hz, 3H), 5.87-5.81 (m, 1H), 5.10 (t,  $J = 9.0$  Hz, 2H), 4.23 (s, 2H), 2.95-2.86 (m, 2H), 2.78 (dd,  $J = 7.2$  Hz,  $J = 6.0$  Hz, 1H).  $^{13}\text{C}$   $\{^1\text{H}\}$  NMR ( $\text{CDCl}_3$ , 150 MHz):  $\delta$  167.9, 139.7, 138.9, 132.9, 131.0, 129.4, 128.6, 128.4, 126.8, 126.2, 116.4, 68.1, 44.6, 38.1. HRMS (ESI-TLQ)  $m/z$ :  $[\text{M} + \text{H}]^+$  calcd for  $\text{C}_{18}\text{H}_{20}\text{NO}$ , 266.1539; found, 266.1539.



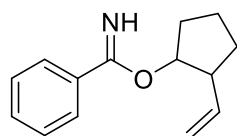

**1x**, 27%

**2-vinylcyclopentyl benzimidate (1x).** Colorless oil (0.29 g, 27%), (EtOAc/ Petroleum ether, 1/10-1/5, v/v).  $^1\text{H}$  NMR ( $\text{CDCl}_3$ , 400 MHz):  $\delta$  7.74 (d,  $J = 6.8$  Hz, 2H), 7.47-7.38 (m, 3H), 5.93-5.85 (m, 1H), 5.13 (d,  $J = 17.2$  Hz, 1H), 5.16-5.02 (m, 2H), 2.84-2.77 (m, 1H), 2.23-2.12 (m, 1H), 2.05-1.97 (m, 1H), 1.85-1.72 (m, 3H), 1.58-1.49 (m, 1H).  $^{13}\text{C}$   $\{^1\text{H}\}$  NMR ( $\text{CDCl}_3$ , 100 MHz):  $\delta$  167.4, 140.0, 133.3, 130.9, 128.5, 126.9, 114.7, 81.7, 49.6, 31.6, 30.0, 22.8. HRMS (ESI-TLQ)  $m/z$ :  $[\text{M} + \text{H}]^+$  calcd for  $\text{C}_{14}\text{H}_{18}\text{NO}$ , 216.1383; found, 216.1385.

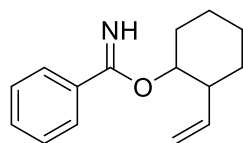

**1y**, 43%

**2-vinylcyclohexyl benzimidate (1y).** Colorless oil (0.49 g, 43%), (EtOAc/ Petroleum ether, 1/10-1/5, v/v).  $^1\text{H}$  NMR ( $\text{CDCl}_3$ , 400 MHz):  $\delta$  7.71 (d,  $J = 7.2$  Hz, 2H), 7.44-7.36 (m, 3H), 5.88-5.79 (m, 1H), 5.11 (d,  $J = 17.2$  Hz, 1H), 4.99 (d,  $J = 10.8$  Hz, 1H), 4.86 (s, 1H), 2.39-2.28 (m, 2H), 1.87-1.73 (m, 3H), 1.50-1.26 (m, 5H).  $^{13}\text{C}$   $\{^1\text{H}\}$  NMR ( $\text{CDCl}_3$ , 100 MHz):  $\delta$  167.4, 140.7, 133.6, 130.7, 128.4, 126.8, 114.8, 76.5, 47.5, 31.3, 31.1, 25.1, 24.5. HRMS (ESI-TLQ)  $m/z$ :  $[\text{M} + \text{H}]^+$  calcd for  $\text{C}_{15}\text{H}_{20}\text{NO}$ , 230.1539; found, 230.1541.

## Characterization Data of 2a-2y, 2aa, 3, 4, 5, 6 and 7

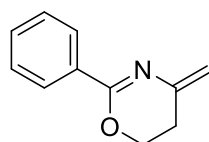

**2a**, 86%

**4-methylene-2-(p-tolyl)-5,6-dihydro-4H-1,3-oxazine (2a).** Pale Yellow oil (44.7 mg, 86%), (EtOAc/ Petroleum ether, 1/50-1/10, v/v).  $^1\text{H}$  NMR ( $\text{CDCl}_3$ , 400 MHz):  $\delta$  8.00 (d,  $J = 7.2$  Hz, 2H), 7.44 (t,  $J = 7.6$  Hz, 1H), 7.38 (t,  $J = 7.6$  Hz, 2H), 5.10 (s, 1H), 4.61 (s, 1H), 4.41 (t,  $J = 5.6$  Hz, 2H), 2.63 (t,  $J = 6.0$  Hz, 2H).  $^{13}\text{C}$   $\{^1\text{H}\}$  NMR ( $\text{CDCl}_3$ , 100 MHz):  $\delta$  156.1, 143.4, 133.0, 131.1, 128.2, 127.7, 106.4, 65.5, 27.2. HRMS (ESI-TLQ)  $m/z$ :  $[\text{2M} + \text{H}]^+$  calcd for  $\text{C}_{22}\text{H}_{23}\text{N}_2\text{O}_2$ , 347.1754; found, 347.1753.

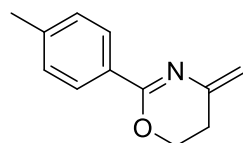

**2b**, 82%

**4-methylene-2-(p-tolyl)-5,6-dihydro-4H-1,3-oxazine (2b).** Colorless oil (46.1 mg, 82%), (EtOAc/ Petroleum ether, 1/50-1/10, v/v).  $^1\text{H}$  NMR ( $\text{CDCl}_3$ , 400 MHz):  $\delta$  7.89

(d,  $J = 8.0$  Hz, 2H), 7.18 (d,  $J = 8.0$  Hz, 2H), 5.07 (s, 1H), 4.58 (s, 1H), 4.39 (t,  $J = 5.6$  Hz, 2H), 2.61 (t,  $J = 6.0$  Hz, 2H), 2.37 (s, 3H).  $^{13}\text{C}$  { $^1\text{H}$ } NMR ( $\text{CDCl}_3$ , 100 MHz):  $\delta$  156.3, 143.5, 141.4, 130.2, 129.0, 127.7, 106.0, 65.5, 27.3, 21.6. HRMS (ESI-TLQ)  $m/z$ : [ $2\text{M} + \text{H}$ ] $^+$  calcd for  $\text{C}_{24}\text{H}_{27}\text{N}_2\text{O}_2$ , 375.2067; found, 375.2066.

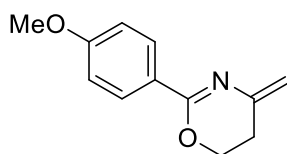

**2c**, 81%

**2-(4-methoxyphenyl)-4-methylene-5,6-dihydro-4H-1,3-oxazine (2c)**. Colorless oil (49.5 mg, 81%), (EtOAc/ Petroleum ether, 1/50-1/10, v/v).  $^1\text{H}$  NMR ( $\text{CDCl}_3$ , 400 MHz):  $\delta$  7.96 (d,  $J = 8.8$  Hz, 2H), 6.89 (d,  $J = 8.8$  Hz, 2H), 5.05 (s, 1H), 4.57 (s, 1H), 4.39 (t,  $J = 6.0$  Hz, 2H), 3.84 (s, 3H), 2.62 (t,  $J = 6.0$  Hz, 2H).  $^{13}\text{C}$  { $^1\text{H}$ } NMR ( $\text{CDCl}_3$ , 100 MHz):  $\delta$  162.0, 156.1, 143.6, 129.4, 125.4, 113.5, 105.5, 65.4, 55.4, 27.3. HRMS (ESI-TLQ)  $m/z$ : [ $2\text{M} + \text{H}$ ] $^+$  calcd for  $\text{C}_{24}\text{H}_{27}\text{N}_2\text{O}_4$ , 407.1965; found, 407.1963.

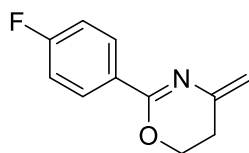

**2d**, 59%

**2-(4-fluorophenyl)-4-methylene-5,6-dihydro-4H-1,3-oxazine (2d)**. Yellow oil (36.9 mg, 59%), (EtOAc/ Petroleum ether, 1/50-1/10, v/v).  $^1\text{H}$  NMR ( $\text{CDCl}_3$ , 400 MHz):  $\delta$  8.01 (dd,  $J = 5.6$  Hz,  $J = 2.8$  Hz, 2H), 7.06 (t,  $J = 8.4$  Hz, 2H), 5.09 (s, 1H), 4.62 (s, 1H), 4.41 (t,  $J = 5.6$  Hz, 2H), 2.64 (t,  $J = 5.6$  Hz, 2H).  $^{13}\text{C}$  { $^1\text{H}$ } NMR ( $\text{CDCl}_3$ , 100 MHz):  $\delta$  164.8 (d,  $J = 249.7$  Hz), 155.3, 143.2, 129.9 (d,  $J = 8.7$  Hz), 129.2 (d,  $J = 2.8$  Hz), 115.3 (d,  $J = 21.6$  Hz), 106.5, 65.6, 27.2.  $^{19}\text{F}$  NMR ( $\text{CDCl}_3$ , 564 MHz):  $\delta$  -109.4. HRMS (ESI-TLQ)  $m/z$ : [ $2\text{M} + \text{H}$ ] $^+$  calcd for  $\text{C}_{22}\text{H}_{21}\text{F}_2\text{N}_2\text{O}_2$ , 383.1566; found, 383.1565.

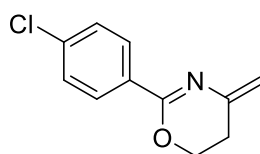

**2e**, 75%

**2-(4-chlorophenyl)-4-methylene-5,6-dihydro-4H-1,3-oxazine (2e)**. Yellow solid (46.4 mg, 75%), (EtOAc/ Petroleum ether, 1/50-1/10, v/v). mp 79-80 °C.  $^1\text{H}$  NMR ( $\text{CDCl}_3$ , 400 MHz):  $\delta$  7.94 (d,  $J = 8.4$  Hz, 2H), 7.35 (d,  $J = 8.8$  Hz, 2H), 5.10 (s, 1H), 4.63 (s, 1H), 4.40 (t,  $J = 6.0$  Hz, 2H), 2.63 (t,  $J = 6.0$  Hz, 2H).  $^{13}\text{C}$  { $^1\text{H}$ } NMR ( $\text{CDCl}_3$ , 100 MHz):  $\delta$  155.2, 143.1, 137.3, 131.5, 129.1, 128.5, 106.8, 65.6, 27.2. HRMS (ESI-TLQ)  $m/z$ : [ $2\text{M} + \text{H}$ ] $^+$  calcd for  $\text{C}_{22}\text{H}_{21}\text{Cl}_2\text{N}_2\text{O}_2$ , 415.0975; found, 415.0973.

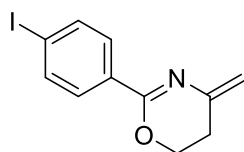

**2f**, 30%

**2-(4-iodophenyl)-4-methylene-5,6-dihydro-4H-1,3-oxazine (2f).** White solid (26.6 mg, 30%), (EtOAc/ Petroleum ether, 1/50-1/10, v/v). mp 104-105 °C. <sup>1</sup>H NMR (CDCl<sub>3</sub>, 400 MHz): δ 7.73 (s, 4H), 5.10 (s, 1H), 4.64 (s, 1H), 4.40 (t, *J* = 5.6 Hz, 2H), 2.63 (t, *J* = 6.0 Hz, 2H). <sup>13</sup>C {<sup>1</sup>H} NMR (CDCl<sub>3</sub>, 100 MHz): δ 155.5, 143.1, 137.4, 132.5, 129.3, 107.0, 98.2, 65.6, 27.1. HRMS (ESI-TLQ) *m/z*: [M + H]<sup>+</sup> calcd for C<sub>11</sub>H<sub>11</sub>INO, 299.9880; found, 299.9879.

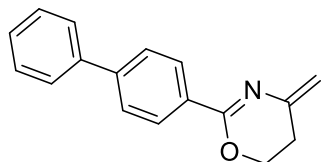

**2g, 72%**

**2-([1,1'-biphenyl]-4-yl)-4-methylene-5,6-dihydro-4H-1,3-oxazine (2g).** Yellow solid (53.5 mg, 72%), (EtOAc/ Petroleum ether, 1/50-1/10, v/v). mp 104-105 °C. <sup>1</sup>H NMR (CDCl<sub>3</sub>, 400 MHz): δ 8.08 (d, *J* = 8.4 Hz, 2H), 7.63 (d, *J* = 8.0 Hz, 4H), 7.45 (t, *J* = 7.2 Hz, 2H), 7.36 (t, *J* = 7.6 Hz, 1H), 5.12 (s, 1H), 4.63 (s, 1H), 4.43 (t, *J* = 6.0 Hz, 2H), 2.65 (t, *J* = 6.0 Hz, 2H). <sup>13</sup>C {<sup>1</sup>H} NMR (CDCl<sub>3</sub>, 100 MHz): δ 156.0, 143.7, 143.5, 140.5, 131.9, 129.0, 128.2, 127.9, 127.3, 126.9, 106.4, 65.6, 27.3. HRMS (ESI-TLQ) *m/z*: [M + H]<sup>+</sup> calcd for C<sub>17</sub>H<sub>16</sub>NO, 250.1226; found, 250.1226.

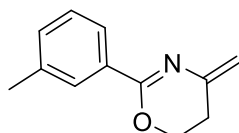

**2h, 93%**

**4-methylene-2-(m-tolyl)-5,6-dihydro-4H-1,3-oxazine (2h).** Yellow oil (54.5 mg, 93%), (EtOAc/ Petroleum ether, 1/50-1/10, v/v). <sup>1</sup>H NMR (CDCl<sub>3</sub>, 400 MHz): δ 7.85 (s, 1H), 7.79 (d, *J* = 6.8 Hz, 1H), 7.29-7.23 (m, 2H), 5.10 (s, 1H), 4.60 (s, 1H), 4.41-4.37 (m, 2H), 2.61 (t, *J* = 6.0 Hz, 2H), 2.37 (s, 3H). <sup>13</sup>C {<sup>1</sup>H} NMR (CDCl<sub>3</sub>, 100 MHz): δ 156.3, 143.4, 137.9, 132.9, 131.9, 128.2, 128.1, 124.8, 106.3, 65.5, 27.3, 21.5. HRMS (ESI-TLQ) *m/z*: [2M + H]<sup>+</sup> calcd for C<sub>24</sub>H<sub>27</sub>N<sub>2</sub>O<sub>2</sub>, 375.2067; found, 375.2066.

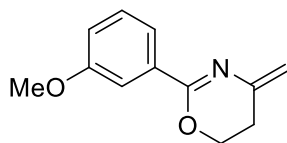

**2i, 71%**

**2-(3-methoxyphenyl)-4-methylene-5,6-dihydro-4H-1,3-oxazine (2i).** Colorless oil (43.1 mg, 71%), (EtOAc/ Petroleum ether, 1/50-1/10, v/v). <sup>1</sup>H NMR (CDCl<sub>3</sub>, 400 MHz): δ 7.60 (d, *J* = 8.0 Hz, 1H), 7.55 (s, 1H), 7.29 (dd, *J* = 8.0 Hz, *J* = 8.0 Hz, 1H), 7.00 (dd, *J* = 2.4 Hz, *J* = 5.6 Hz, 1H), 5.11 (s, 1H), 4.63 (s, 1H), 4.41 (t, *J* = 6.0 Hz, 2H), 3.85 (s, 3H), 2.63 (t, *J* = 5.6 Hz, 2H). <sup>13</sup>C {<sup>1</sup>H} NMR (CDCl<sub>3</sub>, 100 MHz): δ 159.5, 156.0, 143.3, 134.4, 129.2, 120.2, 117.8, 112.1, 106.5, 65.5, 55.5, 27.2. HRMS (ESI-TLQ) *m/z*: [2M + H]<sup>+</sup> calcd for C<sub>24</sub>H<sub>27</sub>N<sub>2</sub>O<sub>4</sub>, 407.1965; found, 407.1963.

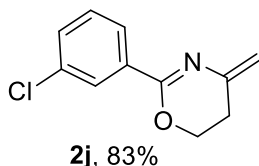

**2-(3-chlorophenyl)-4-methylene-5,6-dihydro-4H-1,3-oxazine (2j).** Colorless oil (51.6 mg, 83%), (EtOAc/ Petroleum ether, 1/50-1/10, v/v). <sup>1</sup>H NMR (CDCl<sub>3</sub>, 400 MHz): δ 8.00 (s, 1H), 7.89 (d, *J* = 7.6 Hz, 1H), 7.41 (d, *J* = 8.0 Hz, 1H), 7.31 (t, *J* = 8.0 Hz, 1H), 5.12 (s, 1H), 4.65 (s, 1H), 4.41 (t, *J* = 6.0 Hz, 2H), 2.63 (t, *J* = 5.6 Hz, 2H). <sup>13</sup>C {<sup>1</sup>H} NMR (CDCl<sub>3</sub>, 100 MHz): δ 154.8, 143.0, 134.8, 134.4, 131.1, 129.5, 127.8, 125.8, 107.2, 65.7, 27.1. HRMS (ESI-TLQ) *m/z*: [2M + H]<sup>+</sup> calcd for C<sub>22</sub>H<sub>21</sub>Cl<sub>2</sub>N<sub>2</sub>O<sub>2</sub>, 415.0975; found, 415.0973.

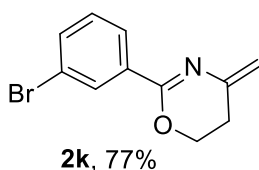

**2-(3-bromophenyl)-4-methylene-5,6-dihydro-4H-1,3-oxazine (2k).** Colorless oil (58.5 mg, 77%), (EtOAc/ Petroleum ether, 1/50-1/10, v/v). <sup>1</sup>H NMR (CDCl<sub>3</sub>, 400 MHz): δ 8.16 (s, 1H), 7.94 (d, *J* = 7.6 Hz, 1H), 7.57 (d, *J* = 6.0 Hz, 1H), 7.26 (t, *J* = 7.6 Hz, 1H), 5.12 (s, 1H), 4.66 (s, 1H), 4.41 (t, *J* = 6.0 Hz, 2H), 2.64 (t, *J* = 5.6 Hz, 2H). <sup>13</sup>C {<sup>1</sup>H} NMR (CDCl<sub>3</sub>, 100 MHz): δ 154.7, 143.0, 135.0, 134.0, 130.7, 129.8, 126.3, 122.4, 107.2, 65.7, 27.1. HRMS (ESI-TLQ) *m/z*: [M + H]<sup>+</sup> calcd for C<sub>11</sub>H<sub>11</sub>BrNO, 252.0019; found, 252.0017.

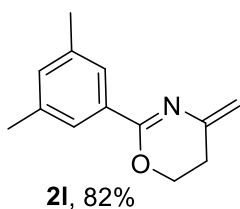

**2-(3,5-dimethylphenyl)-4-methylene-5,6-dihydro-4H-1,3-oxazine (2l).** Yellow oil (49.6 mg, 82%), (EtOAc/ Petroleum ether, 1/50-1/10, v/v). <sup>1</sup>H NMR (CDCl<sub>3</sub>, 400 MHz): δ 7.63 (s, 2H), 7.08 (s, 1H), 5.09 (s, 1H), 4.60 (s, 1H), 4.39 (t, *J* = 6.4 Hz, 2H), 2.62 (t, *J* = 6.0 Hz, 2H), 2.33 (s, 6H). <sup>13</sup>C {<sup>1</sup>H} NMR (CDCl<sub>3</sub>, 100 MHz): δ 156.5, 143.4, 137.8, 132.9, 132.8, 125.4, 106.1, 65.5, 27.3, 21.3. HRMS (ESI-TLQ) *m/z*: [2M + H]<sup>+</sup> calcd for C<sub>26</sub>H<sub>31</sub>N<sub>2</sub>O<sub>2</sub>, 403.2380; found, 403.2378.

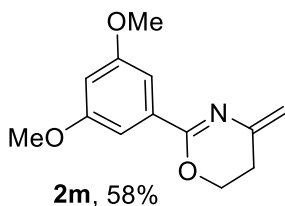

**2-(3,5-dimethoxyphenyl)-4-methylene-5,6-dihydro-4H-1,3-oxazine (2m).** Yellow oil (40.2 mg, 58%), (EtOAc/ Petroleum ether, 1/50-1/10, v/v). <sup>1</sup>H NMR (CDCl<sub>3</sub>, 400

MHz):  $\delta$  7.18 (s, 2H), 6.56 (s, 1H), 5.11 (s, 1H), 4.63 (s, 1H), 4.41 (t,  $J = 6.0$  Hz, 2H), 3.83 (s, 6H), 2.63 (t,  $J = 6.0$  Hz, 2H).  $^{13}\text{C}$   $\{^1\text{H}\}$  NMR ( $\text{CDCl}_3$ , 100 MHz):  $\delta$  160.6, 155.9, 143.3, 135.0, 106.7, 105.4, 104.2, 65.6, 55.6, 27.2. HRMS (ESI-TLQ)  $m/z$ :  $[2\text{M} + \text{Na}]^+$  calcd for  $\text{C}_{26}\text{H}_{30}\text{N}_2\text{NaO}_6$ , 489.1996; found, 489.1995.

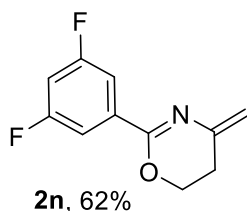

**2-(3,5-difluorophenyl)-4-methylene-5,6-dihydro-4H-1,3-oxazine (2n)**. Colorless oil (26.0 mg, 62%), (EtOAc/ Petroleum ether, 1/50-1/10, v/v).  $^1\text{H}$  NMR ( $\text{CDCl}_3$ , 400 MHz):  $\delta$  7.56-7.50 (m, 2H), 6.91-6.85 (m, 1H), 5.13 (s, 1H), 4.68 (s, 1H), 4.41 (t,  $J = 6.0$  Hz, 2H), 2.64 (t,  $J = 6.0$  Hz, 2H).  $^{13}\text{C}$   $\{^1\text{H}\}$  NMR ( $\text{CDCl}_3$ , 100 MHz):  $\delta$  162.8 (dd,  $J = 12.3$  Hz,  $J = 234.2$  Hz), 153.9, 142.8, 136.5 (t,  $J = 9.7$  Hz), 110.7 (dd,  $J = 7.4$  Hz,  $J = 12.2$  Hz), 107.9, 106.3 (t,  $J = 25.4$  Hz), 65.8, 27.0.  $^{19}\text{F}$  NMR ( $\text{CDCl}_3$ , 564 MHz):  $\delta$  -109.8. HRMS (ESI-TLQ)  $m/z$ :  $[2\text{M} + \text{Na}]^+$  calcd for  $\text{C}_{22}\text{H}_{18}\text{F}_4\text{N}_2\text{NaO}_2$ , 441.1196; found, 441.1189.

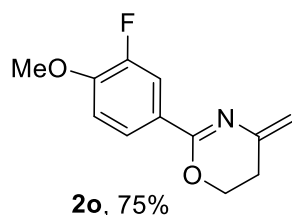

**2-(3-fluoro-4-methoxyphenyl)-4-methylene-5,6-dihydro-4H-1,3-oxazine (2o)**. Colorless oil (49.4 mg, 75%), (EtOAc/ Petroleum ether, 1/50-1/10, v/v).  $^1\text{H}$  NMR ( $\text{CDCl}_3$ , 400 MHz):  $\delta$  7.74 (dd,  $J = 7.2$  Hz,  $J = 10.4$  Hz, 2H), 6.94 (t,  $J = 8.8$  Hz, 1H), 5.07 (s, 1H), 4.60 (s, 1H), 4.39 (t,  $J = 5.6$  Hz, 2H), 3.93 (s, 3H), 2.62 (t,  $J = 6.0$  Hz, 2H).  $^{13}\text{C}$   $\{^1\text{H}\}$  NMR ( $\text{CDCl}_3$ , 100 MHz):  $\delta$  155.0 (d,  $J = 2.9$  Hz), 151.9 (d,  $J = 243.8$  Hz), 150.2 (d,  $J = 10.7$  Hz), 143.3, 126.1 (d,  $J = 6.8$  Hz), 124.2, 115.5 (d,  $J = 20.2$  Hz), 112.4, 106.2, 65.6, 56.3, 27.3.  $^{19}\text{F}$  NMR ( $\text{CDCl}_3$ , 564 MHz):  $\delta$  -135.4. HRMS (ESI-TLQ)  $m/z$ :  $[\text{M} + \text{H}]^+$  calcd for  $\text{C}_{12}\text{H}_{13}\text{FNO}_2$ , 222.0925; found, 222.0926.

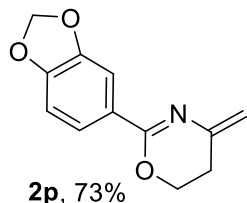

**2-(benzo[d][1,3]dioxol-5-yl)-4-methylene-5,6-dihydro-4H-1,3-oxazine (2p)**. Yellow oil (47.7 mg, 73%), (EtOAc/ Petroleum ether, 1/50-1/10, v/v).  $^1\text{H}$  NMR ( $\text{CDCl}_3$ , 400 MHz):  $\delta$  7.57 (dd,  $J = 1.6$  Hz,  $J = 6.8$  Hz, 1H), 7.49 (s, 1H), 6.80 (d,  $J = 8.4$  Hz, 1H), 6.00 (s, 2H), 5.05 (s, 1H), 4.57 (s, 1H), 4.38 (t,  $J = 5.6$  Hz, 2H), 2.61 (t,  $J = 5.6$  Hz, 2H).  $^{13}\text{C}$   $\{^1\text{H}\}$  NMR ( $\text{CDCl}_3$ , 100 MHz):  $\delta$  155.7, 150.2, 147.7, 143.4, 127.2, 122.7, 108.0, 107.9, 105.8, 101.6, 65.5, 27.3. HRMS (ESI-TLQ)  $m/z$ :  $[2\text{M} + \text{H}]^+$  calcd for

C<sub>24</sub>H<sub>23</sub>N<sub>2</sub>O<sub>6</sub>, 435.1551; found, 435.1548.

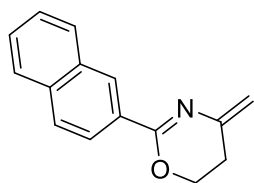

**2q**, 72%

**4-methylene-2-(naphthalen-2-yl)-5,6-dihydro-4H-1,3-oxazine (2q)**. White solid (48.5 mg, 72%), (EtOAc/ Petroleum ether, 1/50-1/10, v/v). mp 85-86 °C. <sup>1</sup>H NMR (CDCl<sub>3</sub>, 400 MHz): δ 8.51 (s, 1H), 8.13 (d, *J* = 8.8 Hz, 1H), 7.91 (d, *J* = 7.2 Hz, 1H), 7.83 (d, *J* = 8.4 Hz, 2H), 7.53-7.47 (m, 2H), 5.16 (s, 1H), 4.65 (s, 1H), 4.46 (t, *J* = 5.6 Hz, 2H), 2.67 (t, *J* = 5.6 Hz, 2H). <sup>13</sup>C {<sup>1</sup>H} NMR (CDCl<sub>3</sub>, 100 MHz): δ 156.2, 143.5, 134.8, 132.9, 130.4, 129.1, 128.1, 127.9, 127.8, 127.4, 126.4, 124.5, 106.6, 65.6, 27.4. HRMS (ESI-TLQ) *m/z*: [M + H]<sup>+</sup> calcd for C<sub>15</sub>H<sub>14</sub>NO, 224.1070; found, 224.1070.

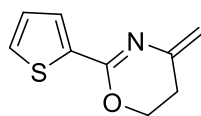

**2r**, 81%

**4-methylene-2-(thiophen-2-yl)-5,6-dihydro-4H-1,3-oxazine (2r)**. Colorless oil (43.5 mg, 81%), (EtOAc/ Petroleum ether, 1/50-1/10, v/v). <sup>1</sup>H NMR (CDCl<sub>3</sub>, 400 MHz): δ 7.60 (d, *J* = 3.6 Hz, 1H), 7.41 (d, *J* = 5.2 Hz, 1H), 7.05 (t, *J* = 4.4 Hz, 1H), 5.06 (s, 1H), 4.59 (s, 1H), 4.39 (t, *J* = 6.0 Hz, 2H), 2.63 (t, *J* = 6.0 Hz, 2H). <sup>13</sup>C {<sup>1</sup>H} NMR (CDCl<sub>3</sub>, 100 MHz): δ 152.9, 142.9, 137.4, 129.7, 129.2, 127.6, 106.4, 65.7, 27.3. HRMS (ESI-TLQ) *m/z*: [M + H]<sup>+</sup> calcd for C<sub>18</sub>H<sub>19</sub>N<sub>2</sub>O<sub>2</sub>S<sub>2</sub>, 359.0882; found, 359.0877.

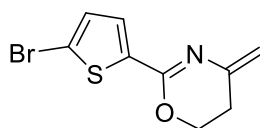

**2s**, 63%

**2-(5-bromothiophen-2-yl)-4-methylene-5,6-dihydro-4H-1,3-oxazine (2s)**. Colorless oil (28.5 mg, 63%), (EtOAc/ Petroleum ether, 1/50-1/10, v/v). <sup>1</sup>H NMR (CDCl<sub>3</sub>, 400 MHz): δ 7.32 (d, *J* = 4.0 Hz, 1H), 7.00 (d, *J* = 3.6 Hz, 1H), 5.05 (s, 1H), 4.61 (s, 1H), 4.36 (t, *J* = 5.6 Hz, 2H), 2.62 (t, *J* = 5.6 Hz, 2H). <sup>13</sup>C {<sup>1</sup>H} NMR (CDCl<sub>3</sub>, 100 MHz): δ 151.8, 142.6, 138.7, 129.3, 117.2, 106.9, 65.8, 27.3. HRMS (ESI-TLQ) *m/z*: [2M + H]<sup>+</sup> calcd for C<sub>18</sub>H<sub>17</sub>Br<sub>2</sub>N<sub>2</sub>O<sub>2</sub>S<sub>2</sub>, 514.9092; found, 514.9091.

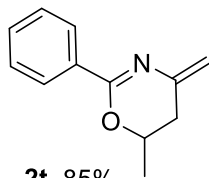

**2t**, 85%

**6-methyl-4-methylene-2-phenyl-5,6-dihydro-4H-1,3-oxazine (2t)**. Colorless oil (47.5 mg, 85%), (EtOAc/ Petroleum ether, 1/50-1/10, v/v). <sup>1</sup>H NMR (CDCl<sub>3</sub>, 400 MHz): δ 8.03 (d, *J* = 7.2 Hz, 2H), 7.44 (t, *J* = 5.6 Hz, 1H), 7.38 (t, *J* = 8.0 Hz, 2H), 5.12 (s, 1H), 4.61 (s, 1H), 4.47-4.39 (m, 1H), 2.64 (dd, *J* = 3.6 Hz, *J* = 11.2 Hz, 1H), 2.31 (dd, *J* = 9.6 Hz, *J* = 4.8 Hz, 1H), 1.43 (d, *J* = 6.4 Hz, 3H). <sup>13</sup>C {<sup>1</sup>H} NMR

(CDCl<sub>3</sub>, 100 MHz):  $\delta$  156.3, 143.8, 133.1, 131.0, 128.2, 127.7, 106.6, 71.9, 34.1, 20.8. HRMS (ESI-TLQ)  $m/z$ : [2M + H]<sup>+</sup> calcd for C<sub>24</sub>H<sub>27</sub>N<sub>2</sub>O<sub>2</sub>, 375.2067; found, 375.2066.

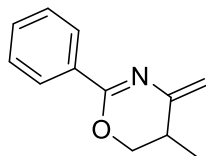

**2u**, 81%

**5-methyl-4-methylene-2-phenyl-5,6-dihydro-4H-1,3-oxazine (2u)**. Yellow oil (45.6 mg, 81%), (EtOAc/ Petroleum ether, 1/50-1/10, v/v). <sup>1</sup>H NMR (CDCl<sub>3</sub>, 400 MHz):  $\delta$  8.02 (d,  $J$  = 6.8 Hz, 2H), 7.44 (t,  $J$  = 7.2 Hz, 1H), 7.38 (t,  $J$  = 7.6 Hz, 2H), 5.08 (s, 1H), 4.70 (s, 1H), 4.36 (dd,  $J$  = 4.4 Hz,  $J$  = 6.0 Hz, 1H), 3.96 (t,  $J$  = 8.8 Hz, 1H), 2.70-2.62 (m, 1H), 1.20 (d,  $J$  = 6.8 Hz, 3H). <sup>13</sup>C {<sup>1</sup>H} NMR (CDCl<sub>3</sub>, 100 MHz):  $\delta$  155.5, 148.9, 132.9, 131.1, 128.2, 127.7, 104.2, 70.4, 30.4, 14.8. HRMS (ESI-TLQ)  $m/z$ : [2M + H]<sup>+</sup> calcd for C<sub>24</sub>H<sub>27</sub>N<sub>2</sub>O<sub>2</sub>, 375.2067; found, 375.2066.

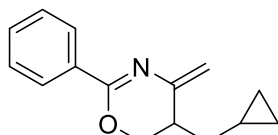

**2v**, 72%

**5-(cyclopropylmethyl)-4-methylene-2-phenyl-5,6-dihydro-4H-1,3-oxazine (2v)**. Yellow oil (48.8 mg, 72%), (EtOAc/ Petroleum ether, 1/50-1/10, v/v). <sup>1</sup>H NMR (CDCl<sub>3</sub>, 400 MHz):  $\delta$  8.02 (d,  $J$  = 7.2 Hz, 2H), 7.44 (t,  $J$  = 7.2 Hz, 1H), 7.39 (t,  $J$  = 7.6 Hz, 2H), 5.09 (s, 1H), 4.66 (s, 1H), 4.47 (dd,  $J$  = 4.0 Hz,  $J$  = 6.8 Hz, 1H), 4.31 (q,  $J$  = 5.2 Hz, 1H), 2.70-2.64 (m, 1H), 1.73-1.66 (m, 1H), 1.34-1.26 (m, 1H), 0.84-0.74 (m, 1H), 0.56-0.44 (m, 2H), 0.13-0.05 (m, 2H). <sup>13</sup>C {<sup>1</sup>H} NMR (CDCl<sub>3</sub>, 100 MHz):  $\delta$  155.4, 147.6, 132.9, 131.1, 128.2, 127.7, 105.4, 68.8, 37.0, 35.2, 8.8, 5.3, 4.3. HRMS (ESI-TLQ)  $m/z$ : [M + H]<sup>+</sup> calcd for C<sub>15</sub>H<sub>18</sub>NO, 228.1383; found, 228.1386.

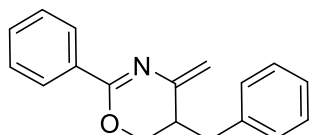

**2w**, 83%

**5-benzyl-4-methylene-2-phenyl-5,6-dihydro-4H-1,3-oxazine (2w)**. Yellow oil (43.8 mg, 83%), (EtOAc/ Petroleum ether, 1/50-1/10, v/v). <sup>1</sup>H NMR (CDCl<sub>3</sub>, 400 MHz):  $\delta$  8.04 (d,  $J$  = 7.2 Hz, 2H), 7.47 (t,  $J$  = 7.2 Hz, 1H), 7.41 (t,  $J$  = 7.6 Hz, 2H), 7.33 (t,  $J$  = 7.2 Hz, 2H), 7.24-7.21 (m, 3H), 5.11 (s, 2H), 4.64 (s, 1H), 4.23 (dd,  $J$  = 3.2 Hz,  $J$  = 7.6 Hz, 1H), 4.16 (dd,  $J$  = 4.4 Hz,  $J$  = 6.4 Hz, 1H), 3.02 (dd,  $J$  = 4.8 Hz,  $J$  = 7.6 Hz, 1H), 2.83-2.71 (m, 2H). <sup>13</sup>C {<sup>1</sup>H} NMR (CDCl<sub>3</sub>, 100 MHz):  $\delta$  155.6, 147.2, 139.0, 132.8, 131.2, 129.3, 128.7, 128.3, 127.8, 126.6, 106.0, 67.6, 38.3, 36.8. HRMS (ESI-TLQ)  $m/z$ : [2M + H]<sup>+</sup> calcd for C<sub>36</sub>H<sub>35</sub>N<sub>2</sub>O<sub>2</sub>, 527.2693; found, 527.2696.

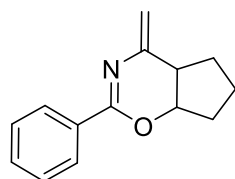

**2x**, 83%

**4-methylene-2-phenyl-4,4a,5,6,7,7a-hexahydrocyclopenta[e][1,3]oxazine (2x).**

Colorless oil (53.4 mg, 83%), (EtOAc/ Petroleum ether, 1/50-1/10, v/v). <sup>1</sup>H NMR (CDCl<sub>3</sub>, 400 MHz): δ 8.06 (d, *J* = 6.8 Hz, 2H), 7.44 (t, *J* = 7.2 Hz, 1H), 7.38 (t, *J* = 8.0 Hz, 2H), 5.06 (s, 1H), 4.57 (s, 1H), 3.93-3.86 (m, 1H), 2.31-2.19 (m, 2H), 2.15-2.08 (m, 1H), 1.98-1.89 (m, 1H), 1.84-1.73 (m, 2H), 1.59-1.49 (m, 1H). <sup>13</sup>C {<sup>1</sup>H} NMR (CDCl<sub>3</sub>, 100 MHz): δ 156.7, 149.7, 133.0, 131.1, 128.2, 128.1, 102.7, 80.4, 42.5, 28.6, 22.8, 19.0. HRMS (ESI-TLQ) *m/z*: [M + H]<sup>+</sup> calcd for C<sub>14</sub>H<sub>16</sub>NO, 214.1226; found, 214.1228.

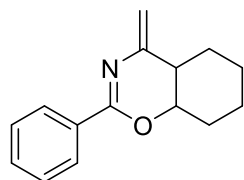

**2y**, 76%

**4-methylene-2-phenyl-4a,5,6,7,8a-hexahydro-4H-benzo[e][1,3]oxazine (2y).**

Yellow oil (51.6 mg, 76%), (EtOAc/ Petroleum ether, 1/50-1/10, v/v). <sup>1</sup>H NMR (CDCl<sub>3</sub>, 400 MHz): δ 8.03 (d, *J* = 7.2 Hz, 2H), 7.43 (t, *J* = 7.2 Hz, 1H), 7.38 (t, *J* = 7.6 Hz, 2H), 5.06 (s, 1H), 4.62 (s, 1H), 3.89-3.82 (m, 1H), 2.23 (d, *J* = 13.6 Hz, 2H), 2.15-2.08 (m, 1H), 1.91-1.84 (m, 2H), 1.59-1.49 (m, 1H), 1.45-1.33 (m, 2H), 1.31-1.21 (m, 1H). <sup>13</sup>C {<sup>1</sup>H} NMR (CDCl<sub>3</sub>, 100 MHz): δ 155.6, 148.6, 133.1, 131.0, 128.2, 127.8, 102.8, 78.3, 39.9, 32.0, 26.5, 25.4, 24.0. HRMS (ESI-TLQ) *m/z*: [M + H]<sup>+</sup> calcd for C<sub>15</sub>H<sub>18</sub>NO, 228.1383; found, 228.1383.

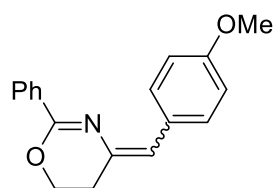

**2aa**, 8%

**4-(4-methoxybenzylidene)-2-phenyl-5,6-dihydro-4H-1,3-oxazine (2aa).**

Yellow oil (6.4 mg, 8%), (EtOAc/ Petroleum ether, 1/50-1/10, v/v). <sup>1</sup>H NMR (CDCl<sub>3</sub>, 400 MHz): δ 8.09 (d, *J* = 6.8 Hz, 2H), 7.92 (d, *J* = 8.8 Hz, 2H), 7.46-7.40 (m, 3H), 6.91 (d, *J* = 8.8 Hz, 2H), 5.76 (s, 1H), 4.51 (t, *J* = 6.0 Hz, 2H), 3.83 (s, 3H), 2.68 (t, *J* = 5.6 Hz, 2H). <sup>13</sup>C {<sup>1</sup>H} NMR (CDCl<sub>3</sub>, 100 MHz): δ 158.3, 155.5, 134.6, 133.4, 131.2, 131.0, 130.0, 128.3, 127.9, 118.9, 113.8, 66.1, 55.4, 28.8. HRMS (ESI-TLQ) *m/z*: [M + H]<sup>+</sup> calcd for C<sub>18</sub>H<sub>18</sub>NO<sub>2</sub>, 280.1332; found, 280.1332.



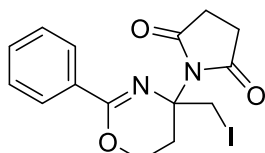

**3a**, 46%

**1-(4-(iodomethyl)-2-phenyl-5,6-dihydro-4H-1,3-oxazin-4-yl)pyrrolidine-2,5-dione (3a)**. Yellow oil (36.7 mg, 46%), (EtOAc/ Petroleum ether, 1/10-1/3, v/v).  $^1\text{H}$  NMR ( $\text{CDCl}_3$ , 400 MHz):  $\delta$  8.00 (d,  $J = 7.2$  Hz, 2H), 7.45 (t,  $J = 7.2$  Hz, 1H), 7.38 (t,  $J = 7.6$  Hz, 2H), 4.42-4.36 (m, 1H), 4.34-4.27 (m, 1H), 4.04 (dd,  $J = 10.0$  Hz,  $J = 4.4$  Hz, 2H), 2.98-2.92 (m, 1H), 2.69 (s, 4H), 2.44-2.36 (m, 1H).  $^{13}\text{C}$   $\{^1\text{H}\}$  NMR ( $\text{CDCl}_3$ , 100 MHz):  $\delta$  177.0, 157.6, 133.0, 131.4, 128.3, 128.0, 71.5, 62.3, 29.1, 28.6, 15.9. HRMS (ESI-TLQ)  $m/z$ :  $[\text{M} + \text{H}]^+$  calcd for  $\text{C}_{15}\text{H}_{16}\text{IN}_2\text{O}_3$ , 399.0200; found, 399.0201.

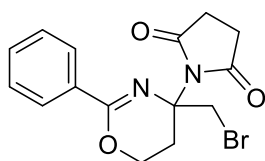

**3b**, 56%

**1-(4-(bromomethyl)-2-phenyl-5,6-dihydro-4H-1,3-oxazin-4-yl)pyrrolidine-2,5-dione (3b)**. Yellow oil (39.2 mg, 56%), (EtOAc/ Petroleum ether, 1/10-1/3, v/v).  $^1\text{H}$  NMR ( $\text{CDCl}_3$ , 400 MHz):  $\delta$  7.97 (d,  $J = 8.0$  Hz, 2H), 7.45 (t,  $J = 7.2$  Hz, 1H), 7.37 (t,  $J = 7.2$  Hz, 2H), 4.43-4.30 (m, 3H), 3.93 (d,  $J = 10.4$  Hz, 1H), 3.02-2.96 (m, 1H), 2.69 (s, 4H), 2.46-2.38 (m, 1H).  $^{13}\text{C}$   $\{^1\text{H}\}$  NMR ( $\text{CDCl}_3$ , 100 MHz):  $\delta$  177.1, 157.6, 133.0, 131.4, 128.2, 128.0, 72.3, 62.2, 38.2, 28.6, 28.4. HRMS (ESI-TLQ)  $m/z$ :  $[\text{M} + \text{H}]^+$  calcd for  $\text{C}_{15}\text{H}_{16}\text{BrN}_2\text{O}_3$ , 351.0339; found, 351.0335.

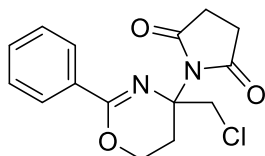

**3c**, 57%

**1-(4-(chloromethyl)-2-phenyl-5,6-dihydro-4H-1,3-oxazin-4-yl)pyrrolidine-2,5-dione (3c)**. Colorless oil (35.2 mg, 57%), (EtOAc/ Petroleum ether, 1/10-1/3, v/v).  $^1\text{H}$  NMR ( $\text{CDCl}_3$ , 400 MHz):  $\delta$  7.97 (d,  $J = 7.2$  Hz, 2H), 7.45 (t,  $J = 7.2$  Hz, 1H), 7.37 (t,  $J = 8.0$  Hz, 2H), 4.47-4.35 (m, 3H), 3.97 (d,  $J = 11.6$  Hz, 1H), 3.05-2.99 (m, 1H), 2.69 (s, 4H), 2.44-2.37 (m, 1H).  $^{13}\text{C}$   $\{^1\text{H}\}$  NMR ( $\text{CDCl}_3$ , 100 MHz):  $\delta$  177.1, 157.7, 133.1, 131.4, 128.3, 128.0, 72.9, 62.2, 48.5, 28.6, 27.7. HRMS (ESI-TLQ)  $m/z$ :  $[\text{M} + \text{H}]^+$  calcd for  $\text{C}_{15}\text{H}_{16}\text{ClN}_2\text{O}_3$ , 307.0844; found, 307.0845.

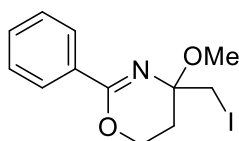

**4a**, 89%

**4-(iodomethyl)-4-methoxy-2-phenyl-5,6-dihydro-4H-1,3-oxazine (4a)**. Colorless oil (59.0 mg, 89%), (EtOAc/ Petroleum ether, 1/50-1/20, v/v).  $^1\text{H}$  NMR ( $\text{CDCl}_3$ , 400

MHz):  $\delta$  7.98 (d,  $J = 7.2$  Hz, 2H), 7.45 (t,  $J = 6.8$  Hz, 1H), 7.38 (t,  $J = 7.2$  Hz, 2H), 4.44-4.38 (m, 1H), 4.30-4.25 (m, 1H), 3.69 (d,  $J = 11.2$  Hz, 1H), 3.42 (s, 3H), 3.25 (d,  $J = 11.2$  Hz, 1H), 2.21-2.09 (m, 2H).  $^{13}\text{C}$   $\{^1\text{H}\}$  NMR ( $\text{CDCl}_3$ , 100 MHz):  $\delta$  157.0, 133.2, 131.2, 128.2, 127.8, 80.2, 62.6, 48.8, 31.1, 12.9. HRMS (ESI-TLQ)  $m/z$ :  $[\text{M} + \text{H}]^+$  calcd for  $\text{C}_{12}\text{H}_{15}\text{INO}_2$ , 332.0142; found, 332.0144.

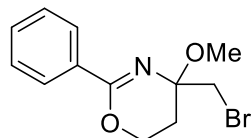

**4b**, 70%

**4-(bromomethyl)-4-methoxy-2-phenyl-5,6-dihydro-4H-1,3-oxazine (4b)**. Yellow oil (39.6 mg, 70%), (EtOAc/ Petroleum ether, 1/50-1/20, v/v).  $^1\text{H}$  NMR ( $\text{CDCl}_3$ , 400 MHz):  $\delta$  7.98 (d,  $J = 7.2$  Hz, 2H), 7.46 (t,  $J = 7.2$  Hz, 1H), 7.38 (t,  $J = 8.0$  Hz, 2H), 4.46-4.40 (m, 1H), 4.35-4.29 (m, 1H), 3.87 (d,  $J = 11.2$  Hz, 1H), 3.44 (s, 3H), 3.33 (d,  $J = 11.2$  Hz, 1H), 2.21-2.08 (m, 2H).  $^{13}\text{C}$   $\{^1\text{H}\}$  NMR ( $\text{CDCl}_3$ , 100 MHz):  $\delta$  157.4, 133.2, 131.3, 128.2, 127.8, 80.8, 62.6, 49.0, 36.6, 29.9. HRMS (ESI-TLQ)  $m/z$ :  $[\text{M} + \text{H}]^+$  calcd for  $\text{C}_{12}\text{H}_{15}\text{BrNO}_2$ , 284.0281; found, 284.0282.

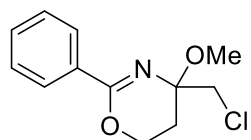

**4c**, 72%

**4-(chloromethyl)-4-methoxy-2-phenyl-5,6-dihydro-4H-1,3-oxazine (4c)**. Colorless oil (34.6 mg, 72%), (EtOAc/ Petroleum ether, 1/50-1/20, v/v).  $^1\text{H}$  NMR ( $\text{CDCl}_3$ , 400 MHz):  $\delta$  7.98 (d,  $J = 7.2$  Hz, 2H), 7.45 (t,  $J = 7.2$  Hz, 1H), 7.38 (t,  $J = 8.0$  Hz, 2H), 4.46-4.40 (m, 1H), 4.36-4.31 (m, 1H), 3.98 (d,  $J = 12.0$  Hz, 1H), 3.44 (s, 3H), 3.41 (d,  $J = 12.4$  Hz, 1H), 2.19-2.04 (m, 2H).  $^{13}\text{C}$   $\{^1\text{H}\}$  NMR ( $\text{CDCl}_3$ , 100 MHz):  $\delta$  157.5, 133.2, 131.3, 128.2, 127.8, 81.3, 62.5, 49.1, 47.2, 29.1. HRMS (ESI-TLQ)  $m/z$ :  $[\text{M} + \text{H}]^+$  calcd for  $\text{C}_{12}\text{H}_{15}\text{ClNO}_2$ , 240.0786; found, 240.0788.

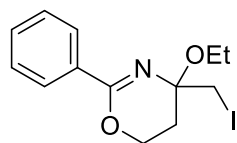

**5a**, 79%

**4-ethoxy-4-(iodomethyl)-2-phenyl-5,6-dihydro-4H-1,3-oxazine (5a)**. Yellow oil (Methods A, 54.7 mg, 79%), (EtOAc/ Petroleum ether, 1/50-1/20, v/v).  $^1\text{H}$  NMR ( $\text{CDCl}_3$ , 400 MHz):  $\delta$  7.97 (d,  $J = 7.6$  Hz, 2H), 7.45 (t,  $J = 7.2$  Hz, 1H), 7.37 (t,  $J = 8.0$  Hz, 2H), 4.45-4.39 (m, 1H), 3.90-3.83 (m, 1H), 3.70 (d,  $J = 11.2$  Hz, 1H), 3.66-3.58 (m, 1H), 3.27 (d,  $J = 11.2$  Hz, 1H), 2.21-2.15 (m, 1H), 2.13-2.06 (m, 1H), 1.20 (t,  $J = 7.2$  Hz, 3H).  $^{13}\text{C}$   $\{^1\text{H}\}$  NMR ( $\text{CDCl}_3$ , 100 MHz):  $\delta$  156.7, 133.2, 131.2, 128.2, 127.7, 80.0, 62.6, 56.5, 31.6, 15.8, 14.0. HRMS (ESI-TLQ)  $m/z$ :  $[\text{M} + \text{H}]^+$  calcd for  $\text{C}_{13}\text{H}_{17}\text{INO}_2$ , 346.0298; found, 346.0300.

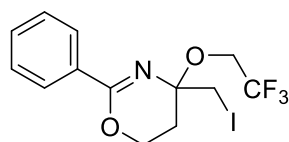

**5b**, 86%

**4-(iodomethyl)-2-phenyl-4-(2,2,2-trifluoroethoxy)-5,6-dihydro-4H-1,3-oxazine**

**(5b)**. Yellow oil (Methods A, 68.5 mg, 86%), (EtOAc/ Petroleum ether, 1/50-1/20, v/v). <sup>1</sup>H NMR (CDCl<sub>3</sub>, 400 MHz): δ 7.98 (d, *J* = 7.6 Hz, 2H), 7.48 (t, *J* = 7.2 Hz, 1H), 7.40 (t, *J* = 7.6 Hz, 2H), 4.44-4.38 (m, 1H), 4.34-4.25 (m, 2H), 4.00-3.91 (m, 1H), 3.53 (d, *J* = 11.2 Hz, 1H), 3.30 (d, *J* = 11.2 Hz, 1H), 2.23 (t, *J* = 5.6 Hz, 2H). <sup>13</sup>C {<sup>1</sup>H} NMR (CDCl<sub>3</sub>, 100 MHz): δ 158.2, 132.6, 131.7, 128.3, 127.9, 124.2 (d, *J* = 276.1 Hz), 81.0, 62.5, 59.3 (q, *J* = 34.6 Hz), 31.1, 12.2. <sup>19</sup>F NMR (CDCl<sub>3</sub>, 564 MHz): δ -73.9. HRMS (ESI-TLQ) *m/z*: [M + H]<sup>+</sup> calcd for C<sub>13</sub>H<sub>14</sub>F<sub>3</sub>INO<sub>2</sub>, 400.0016; found, 400.0018.

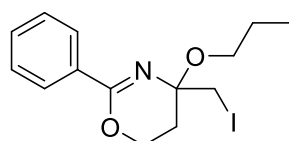

**5c**, 76%

**4-(iodomethyl)-2-phenyl-4-propoxy-5,6-dihydro-4H-1,3-oxazine (5c)**. Yellow oil

(Methods B, 54.5 mg, 76%), (EtOAc/ Petroleum ether, 1/50-1/20, v/v). <sup>1</sup>H NMR (CDCl<sub>3</sub>, 400 MHz): δ 7.97 (d, *J* = 7.2 Hz, 2H), 7.45 (t, *J* = 7.2 Hz, 1H), 7.38 (t, *J* = 8.0 Hz, 2H), 4.46-4.39 (m, 1H), 4.32-4.26 (m, 1H), 3.78-3.72 (m, 1H), 3.69 (d, *J* = 10.8 Hz, 1H), 3.55-3.49 (m, 1H), 3.28 (d, *J* = 10.8 Hz, 1H), 2.22-2.16 (m, 1H), 2.12-2.05 (m, 1H), 1.63-1.54 (m, 2H), 0.92 (t, *J* = 7.6 Hz, 3H). <sup>13</sup>C {<sup>1</sup>H} NMR (CDCl<sub>3</sub>, 100 MHz): δ 156.8, 133.3, 131.1, 128.2, 127.8, 79.9, 62.7, 31.6, 23.5, 14.0, 11.0. HRMS (ESI-TLQ) *m/z*: [M + H]<sup>+</sup> calcd for C<sub>14</sub>H<sub>19</sub>INO<sub>2</sub>, 360.0455; found, 360.0453.

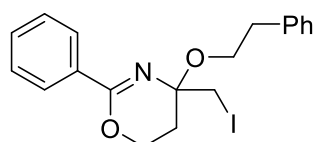

**5d**, 89%

**4-(iodomethyl)-4-phenethoxy-2-phenyl-5,6-dihydro-4H-1,3-oxazine (5d)**. Colorless oil

(Methods B, 72.8 mg, 89%), (EtOAc/ Petroleum ether, 1/50-1/20, v/v). <sup>1</sup>H NMR (CDCl<sub>3</sub>, 400 MHz): δ 7.93 (d, *J* = 7.2 Hz, 2H), 7.45 (t, *J* = 7.2 Hz, 1H), 7.37 (t, *J* = 7.6 Hz, 2H), 7.21 (d, *J* = 4.4 Hz, 4H), 7.18-7.12 (m, 1H), 4.33-4.21 (m, 2H), 4.06 (dd, *J* = 7.6 Hz, *J* = 8.8 Hz, 1H), 3.78 (dd, *J* = 7.6 Hz, *J* = 6.8 Hz, 1H), 3.65 (d, *J* = 10.8 Hz, 1H), 2.92-2.86 (m, 2H), 2.18-2.13 (m, 1H), 2.10-2.03 (m, 1H). <sup>13</sup>C {<sup>1</sup>H} NMR (CDCl<sub>3</sub>, 100 MHz): δ 157.0, 139.2, 133.2, 131.2, 129.1, 128.3, 128.2, 127.8, 126.2, 80.2, 62.6, 61.9, 36.8, 31.5, 13.9. HRMS (ESI-TLQ) *m/z*: [M + H]<sup>+</sup> calcd for C<sub>19</sub>H<sub>21</sub>INO<sub>2</sub>, 422.0611; found, 422.0608.

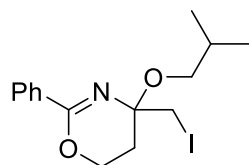

**5e**, 69%

**4-(iodomethyl)-4-isobutoxy-2-phenyl-5,6-dihydro-4H-1,3-oxazine (5e).** Colorless oil (Methods B, 51.4 mg, 69%), (EtOAc/ Petroleum ether, 1/50-1/20, v/v).  $^1\text{H}$  NMR ( $\text{CDCl}_3$ , 400 MHz):  $\delta$  7.98-7.96 (m, 2H), 7.47-7.42 (m, 1H), 7.39-7.36 (m, 2H), 4.46-4.40 (m, 1H), 4.32-4.27 (m, 1H), 3.67 (d,  $J = 10.8$  Hz, 1H), 3.55 (dd,  $J = 7.2$  Hz,  $J = 1.6$  Hz, 1H), 3.33 (dd,  $J = 6.0$  Hz,  $J = 2.4$  Hz, 1H), 3.28 (d,  $J = 10.8$  Hz, 1H), 2.23-2.17 (m, 1H), 2.11-2.04 (m, 1H), 1.86-1.76 (m, 1H), 0.92 (d,  $J = 6.8$  Hz, 3H), 0.88 (d,  $J = 6.8$  Hz, 3H).  $^{13}\text{C}$   $\{^1\text{H}\}$  NMR ( $\text{CDCl}_3$ , 100 MHz):  $\delta$  156.8, 133.4 131.1, 128.2, 127.7, 79.7, 67.5, 62.7, 31.7, 28.9, 19.7, 14.1. HRMS (ESI-TLQ)  $m/z$ :  $[\text{M} + \text{H}]^+$  calcd for  $\text{C}_{15}\text{H}_{21}\text{INO}_2$ , 374.0611; found, 374.0610.

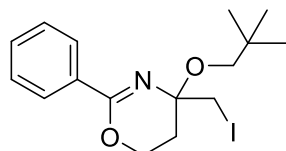

**5f**, 71%

**4-(iodomethyl)-4-(neopentyloxy)-2-phenyl-5,6-dihydro-4H-1,3-oxazine (5f).** Yellow oil (Methods B, 55.1 mg, 71%), (EtOAc/ Petroleum ether, 1/50-1/20, v/v).  $^1\text{H}$  NMR ( $\text{CDCl}_3$ , 400 MHz):  $\delta$  7.96 (d,  $J = 7.2$  Hz, 2H), 7.45 (t,  $J = 7.2$  Hz, 1H), 7.38 (t,  $J = 7.6$  Hz, 2H), 4.47-4.41 (m, 1H), 4.33-4.28 (m, 1H), 3.66 (d,  $J = 10.8$  Hz, 1H), 3.45 (d,  $J = 8.4$  Hz, 1H), 3.29 (d,  $J = 10.8$  Hz, 1H), 3.19 (d,  $J = 8.0$  Hz, 1H), 2.24-2.19 (m, 1H), 2.08-2.01 (m, 1H), 0.89 (s, 9H).  $^{13}\text{C}$   $\{^1\text{H}\}$  NMR ( $\text{CDCl}_3$ , 100 MHz):  $\delta$  156.8, 133.5 131.1, 128.2, 127.8, 79.4, 70.7, 62.8, 31.9, 31.7, 27.0, 14.2. HRMS (ESI-TLQ)  $m/z$ :  $[\text{M} + \text{H}]^+$  calcd for  $\text{C}_{16}\text{H}_{23}\text{INO}_2$ , 388.0768; found, 388.0765.

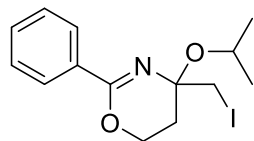

**5g**, 58%

**4-(iodomethyl)-4-isopropoxy-2-phenyl-5,6-dihydro-4H-1,3-oxazine (5g).** Yellow oil (Methods B, 41.6 mg, 58%), (EtOAc/ Petroleum ether, 1/50-1/20, v/v).  $^1\text{H}$  NMR ( $\text{CDCl}_3$ , 400 MHz):  $\delta$  7.98 (d,  $J = 7.2$  Hz, 2H), 7.45 (t,  $J = 7.2$  Hz, 1H), 7.38 (t,  $J = 7.6$  Hz, 2H), 4.44-4.34 (m, 2H), 4.32-4.27 (m, 1H), 3.64 (d,  $J = 10.8$  Hz, 1H), 3.33 (d,  $J = 10.8$  Hz, 1H), 2.14-2.09 (m, 2H), 1.28 (d,  $J = 6.0$  Hz, 3H), 1.07 (d,  $J = 6.0$  Hz, 3H).  $^{13}\text{C}$   $\{^1\text{H}\}$  NMR ( $\text{CDCl}_3$ , 100 MHz):  $\delta$  156.8, 133.3 131.1, 128.2, 127.7, 80.4, 64.4, 62.6, 32.2, 24.8, 24.7, 15.5. HRMS (ESI-TLQ)  $m/z$ :  $[\text{M} + \text{H}]^+$  calcd for  $\text{C}_{14}\text{H}_{19}\text{INO}_2$ , 360.0455; found, 360.0453.

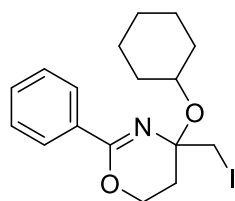

**5h**, 60%

**4-(cyclohexyloxy)-4-(iodomethyl)-2-phenyl-5,6-dihydro-4H-1,3-oxazine (5h).**

Yellow oil (Methods B, 49.9 mg, 60%), (EtOAc/ Petroleum ether, 1/50-1/20, v/v).  $^1\text{H}$  NMR ( $\text{CDCl}_3$ , 400 MHz):  $\delta$  7.96 (d,  $J = 6.8$  Hz, 2H), 7.47-7.44 (m, 1H), 7.39 (t,  $J = 7.6$  Hz, 2H), 4.45-4.38 (m, 1H), 4.33-4.27 (m, 1H), 4.05-3.98 (m, 1H), 3.63 (d,  $J = 10.8$  Hz, 1H), 3.35 (d,  $J = 10.4$  Hz, 1H), 2.17-2.08 (m, 2H), 2.02-1.98 (m, 1H), 1.79-1.59 (m, 3H), 1.51 (t,  $J = 3.6$  Hz, 1H), 1.42-1.36 (m, 1H), 1.33-1.28 (m, 1H), 1.27-1.20 (m, 2H), 1.18-1.09 (m, 1H).  $^{13}\text{C}$   $\{^1\text{H}\}$  NMR ( $\text{CDCl}_3$ , 100 MHz):  $\delta$  156.8, 133.4, 131.1, 128.2, 127.7, 80.3, 70.2, 62.7, 35.0, 34.9, 32.2, 25.7, 24.9, 24.6, 15.8. HRMS (ESI-TLQ)  $m/z$ :  $[\text{M} + \text{H}]^+$  calcd for  $\text{C}_{17}\text{H}_{23}\text{INO}_2$ , 400.0768; found, 400.0766.

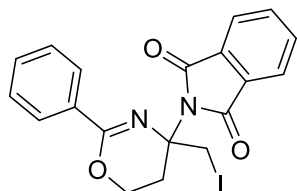

**5i**, 26%

**2-(4-(iodomethyl)-2-phenyl-5,6-dihydro-4H-1,3-oxazin-4-yl)isoindoline-1,3-dione (5i).**

Yellow oil (Methods C, 23.5 mg, 26%), (EtOAc/ Petroleum ether, 1/50-1/20, v/v).  $^1\text{H}$  NMR ( $\text{CDCl}_3$ , 400 MHz):  $\delta$  8.05 (d,  $J = 7.2$  Hz, 2H), 7.84-7.80 (m, 2H), 7.74-7.70 (m, 2H), 7.46 (t,  $J = 7.2$  Hz, 1H), 7.39 (t,  $J = 7.6$  Hz, 2H), 4.48-4.42 (m, 1H), 4.40-4.34 (m, 1H), 4.21 (d,  $J = 10.4$  Hz, 1H), 4.06 (d,  $J = 10.4$  Hz, 1H), 3.14-3.08 (m, 1H), 2.53-2.46 (m, 1H).  $^{13}\text{C}$   $\{^1\text{H}\}$  NMR ( $\text{CDCl}_3$ , 100 MHz):  $\delta$  168.3, 157.5, 134.3, 133.1, 131.7, 131.4, 128.3, 128.1, 123.3, 71.3, 62.4, 29.6, 16.6. HRMS (ESI-TLQ)  $m/z$ :  $[\text{M} + \text{H}]^+$  calcd for  $\text{C}_{19}\text{H}_{16}\text{IN}_2\text{O}_3$ , 447.0200; found, 447.0197.

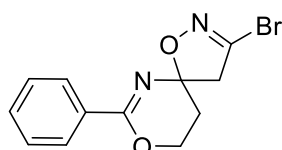

**6**, 45%

**3-bromo-7-phenyl-1,8-dioxo-2,6-diazaspiro[4.5]deca-2,6-diene (6).**

Colorless oil (26.6 mg, 45%), (EtOAc/ Petroleum ether, 1/50-1/10, v/v).  $^1\text{H}$  NMR ( $\text{CDCl}_3$ , 400 MHz):  $\delta$  7.98 (d,  $J = 7.2$  Hz, 2H), 7.47 (t,  $J = 7.2$  Hz, 1H), 7.38 (t,  $J = 8.0$  Hz, 2H), 4.58-4.52 (m, 1H), 4.47-4.41 (m, 1H), 3.41 (d,  $J = 17.6$  Hz, 1H), 3.15 (d,  $J = 17.2$  Hz, 1H), 2.40-2.34 (m, 1H), 2.21-2.14 (m, 1H).  $^{13}\text{C}$   $\{^1\text{H}\}$  NMR ( $\text{CDCl}_3$ , 100 MHz):  $\delta$  158.5, 136.9, 132.6, 131.7, 128.3, 128.0, 92.7, 62.6, 53.7, 30.8. HRMS (ESI-TLQ)  $m/z$ :  $[\text{M} + \text{H}]^+$  calcd for  $\text{C}_{12}\text{H}_{12}\text{BrN}_2\text{O}_2$ , 295.0077; found, 295.0076.

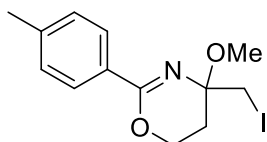

**7b**, 75%

**4-(iodomethyl)-4-methoxy-2-(p-tolyl)-5,6-dihydro-4H-1,3-oxazine (7b).** Yellow oil (51.9 mg, 75%), (EtOAc/ Petroleum ether, 1/50-1/20, v/v).  $^1\text{H}$  NMR ( $\text{CDCl}_3$ , 400 MHz):  $\delta$  7.86 (d,  $J = 8.0$  Hz, 2H), 7.18 (d,  $J = 8.0$  Hz, 2H), 4.42-4.36 (m, 1H), 4.28-4.23 (m, 1H), 3.68 (d,  $J = 11.2$  Hz, 1H), 3.41 (s, 3H), 3.24 (d,  $J = 11.2$  Hz, 1H), 2.38 (s, 3H), 2.20-2.08 (m, 2H).  $^{13}\text{C}$   $\{^1\text{H}\}$  NMR ( $\text{CDCl}_3$ , 100 MHz):  $\delta$  157.1, 141.5, 130.4, 128.9, 127.7, 80.2, 62.6, 48.8, 31.1, 21.6, 13.0. HRMS (ESI-TLQ)  $m/z$ :  $[\text{M} + \text{H}]^+$  calcd for  $\text{C}_{13}\text{H}_{17}\text{INO}_2$ , 346.0298; found, 346.0297.

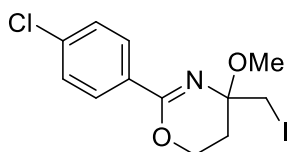

**7e**, 90%

**2-(4-chlorophenyl)-4-(iodomethyl)-4-methoxy-5,6-dihydro-4H-1,3-oxazine (7e).** Yellow oil (65.5 mg, 90%), (EtOAc/ Petroleum ether, 1/50-1/20, v/v).  $^1\text{H}$  NMR ( $\text{CDCl}_3$ , 400 MHz):  $\delta$  7.91 (d,  $J = 8.8$  Hz, 2H), 7.34 (d,  $J = 8.8$  Hz, 2H), 4.43-4.37 (m, 1H), 4.29-4.24 (m, 1H), 3.66 (d,  $J = 10.8$  Hz, 1H), 3.40 (s, 3H), 3.24 (d,  $J = 11.2$  Hz, 1H), 2.20-2.08 (m, 2H).  $^{13}\text{C}$   $\{^1\text{H}\}$  NMR ( $\text{CDCl}_3$ , 100 MHz):  $\delta$  156.0, 137.4, 131.5, 129.1, 128.4, 80.1, 62.7, 48.8, 31.0, 12.6. HRMS (ESI-TLQ)  $m/z$ :  $[\text{M} + \text{H}]^+$  calcd for  $\text{C}_{12}\text{H}_{14}\text{ClINO}_2$ , 365.9752; found, 365.9752.

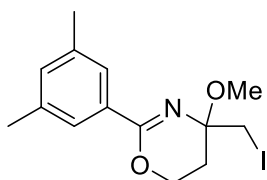

**7i**, 41%

**2-(3,5-dimethylphenyl)-4-(iodomethyl)-4-methoxy-5,6-dihydro-4H-1,3-oxazine (7i).** Yellow oil (29.4 mg, 41%), (EtOAc/ Petroleum ether, 1/50-1/20, v/v).  $^1\text{H}$  NMR ( $\text{CDCl}_3$ , 400 MHz):  $\delta$  7.58 (s, 2H), 7.09 (s, 1H), 4.43-4.37 (m, 1H), 4.29-4.23 (m, 1H), 3.70 (d,  $J = 10.8$  Hz, 1H), 3.42 (s, 3H), 3.24 (d,  $J = 11.2$  Hz, 1H), 2.34 (s, 6H), 2.20-2.08 (m, 2H).  $^{13}\text{C}$   $\{^1\text{H}\}$  NMR ( $\text{CDCl}_3$ , 100 MHz):  $\delta$  157.4, 137.8, 133.1, 133.0, 125.5, 80.2, 62.6, 48.9, 31.1, 21.4, 13.0. HRMS (ESI-TLQ)  $m/z$ :  $[\text{M} + \text{H}]^+$  calcd for  $\text{C}_{14}\text{H}_{19}\text{INO}_2$ , 360.0455; found, 360.0453.

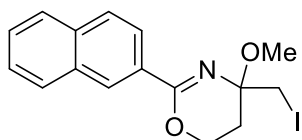

**7q**, 91%

**4-(iodomethyl)-4-methoxy-2-(naphthalen-2-yl)-5,6-dihydro-4H-1,3-oxazine (7q).**

Yellow oil (69.6 mg, 91%), (EtOAc/ Petroleum ether, 1/50-1/20, v/v). <sup>1</sup>H NMR (CDCl<sub>3</sub>, 400 MHz): δ 8.46 (s, 1H), 8.10 (d, *J* = 8.4 Hz, 1H), 7.91 (d, *J* = 7.2 Hz, 1H), 7.84 (t, *J* = 5.2 Hz, 2H), 7.55-7.48 (m, 2H), 4.50-4.45 (m, 1H), 4.36-4.31 (m, 1H), 3.74 (d, *J* = 11.2 Hz, 1H), 3.47 (s, 3H), 3.30 (d, *J* = 11.2 Hz, 1H), 2.26-2.14 (m, 2H). <sup>13</sup>C {<sup>1</sup>H} NMR (CDCl<sub>3</sub>, 100 MHz): δ 157.0, 134.9, 132.8, 130.5, 129.1, 128.2, 127.9, 127.8, 127.5, 126.5, 124.6, 80.4, 62.8, 48.9, 31.2, 12.9. HRMS (ESI-TLQ) *m/z*: [M + H]<sup>+</sup> calcd for C<sub>16</sub>H<sub>17</sub>INO<sub>2</sub>, 382.0298; found, 382.0297.

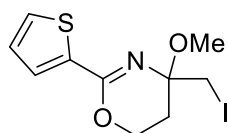

**7r**, 56%

**4-(iodomethyl)-4-methoxy-2-(thiophen-2-yl)-5,6-dihydro-4H-1,3-oxazine (7r).**

Yellow oil (38.0 mg, 56%), (EtOAc/ Petroleum ether, 1/50-1/20, v/v). <sup>1</sup>H NMR (CDCl<sub>3</sub>, 400 MHz): δ 7.57 (dd, *J* = 1.2 Hz, *J* = 2.4 Hz, 1H), 7.39 (dd, *J* = 1.2 Hz, *J* = 4.0 Hz, 1H), 7.03 (dd, *J* = 3.6 Hz, *J* = 1.2 Hz, 1H), 4.43-4.37 (m, 1H), 4.28-4.23 (m, 1H), 3.67 (d, *J* = 11.2 Hz, 1H), 3.40 (s, 3H), 3.23 (d, *J* = 11.2 Hz, 1H), 2.21-2.07 (m, 2H). <sup>13</sup>C {<sup>1</sup>H} NMR (CDCl<sub>3</sub>, 100 MHz): δ 153.7, 137.4, 129.7, 129.3, 127.5, 80.1, 62.9, 48.9, 31.4, 12.7. HRMS (ESI-TLQ) *m/z*: [M + H]<sup>+</sup> calcd for C<sub>10</sub>H<sub>13</sub>INO<sub>2</sub>S, 337.9706; found, 337.9706.

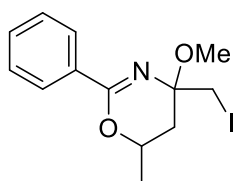

**7t**, 79%, dr = 5:1

**4-(iodomethyl)-4-methoxy-6-methyl-2-phenyl-5,6-dihydro-4H-1,3-oxazine (7t).**

Yellow oil (pure mainly product 23.7 mg, 34%), (EtOAc/ Petroleum ether, 1/50-1/20, v/v). <sup>1</sup>H NMR (CDCl<sub>3</sub>, 400 MHz): δ 8.02 (d, *J* = 7.2 Hz, 2H), 7.46 (t, *J* = 7.2 Hz, 1H), 7.38 (t, *J* = 7.6 Hz, 2H), 4.52-4.44 (m, 1H), 3.71 (d, *J* = 10.8 Hz, 1H), 3.38 (s, 3H), 3.26 (d, *J* = 10.8 Hz, 1H), 2.32 (dd, *J* = 2.4 Hz, *J* = 11.2 Hz, 1H), 1.55 (t, *J* = 13.2 Hz, 1H), 1.43 (d, *J* = 6.4 Hz, 3H). <sup>13</sup>C {<sup>1</sup>H} NMR (CDCl<sub>3</sub>, 100 MHz): δ 158.1, 133.3, 131.2, 128.2, 127.9, 81.0, 69.1, 49.4, 39.7, 20.8, 14.0. HRMS (ESI-TLQ) *m/z*: [M + H]<sup>+</sup> calcd for C<sub>13</sub>H<sub>17</sub>INO<sub>2</sub>, 346.0298; found, 346.0297.

## References

1. (a) Mou, X.-Q.; Rong, F.-M.; Zhang, H.; Chen, G.; He, G. Copper(I)-Catalyzed Enantioselective Intramolecular Aminotrifluoromethylation of *O*-Homoallyl Benzimidates. *Org. Lett.*, **2019**, 21, 4657-4661; (b) Dong, W.; Fang, Z.-Y.; Cao, T.-Y.; Cao, J.-H.; Zhao, Z.-Q.; Zhang, L.-L.; Li, W.; Qi, L.; Wang, L.-J. Copper-Catalyzed Aminosulfonylation of *O*-Homoallyl Benzimidates with Sodium Sulfinates to Access Sulfonylated 1,3-Oxazines. *Org. Lett.* **2021**, 23, 15, 5809-5814; (c) Zhang L.-L.; Qi L.; Chen J M.; Dong, W.; Fang, Z.-Y.; Cao, T.-Y.; Li, W.; Wang, L.-J. Preparation of selenyl 1, 3-oxazines via PhICl<sub>2</sub>/Cu<sub>2</sub>O-promoted aminoselenation of *O*-homoallyl benzimidates with diselenides. *Chem. Commun.*, **2021**, 57, 12655-12658; (d) Mou, X. Q.; Ren, L. C.; Zhang, M.; Wang, M.; Jin, Y. F.; Guan, Q. X.; Cai, A.; Zhang, S. M.; Ren, H.; Zhang, Y.; Chen, Y. Z. Complementary Copper-Catalyzed and Electrochemical Aminosulfonylation of *O*-Homoallyl Benzimidates and *N*-Alkenyl Amidines with Sodium Sulfinates. *Org. Lett.* **2022**, 24, 1405-1411.
2. Fricke P.-J.; Stasko J.-L.; Robbins D.-T.; Gardner A.-C.; Stash J.; Ferraro M.-J.; Fennie M.-W. Copper-catalyzed hydroamination of propargyl imidates. *Tetrahedron Letters*, **2017**, 58, 4510-4513.



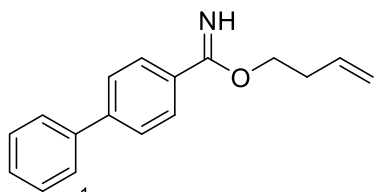

<sup>1</sup>H NMR of **1g**, 27%

CDCl<sub>3</sub>, 600 MHz

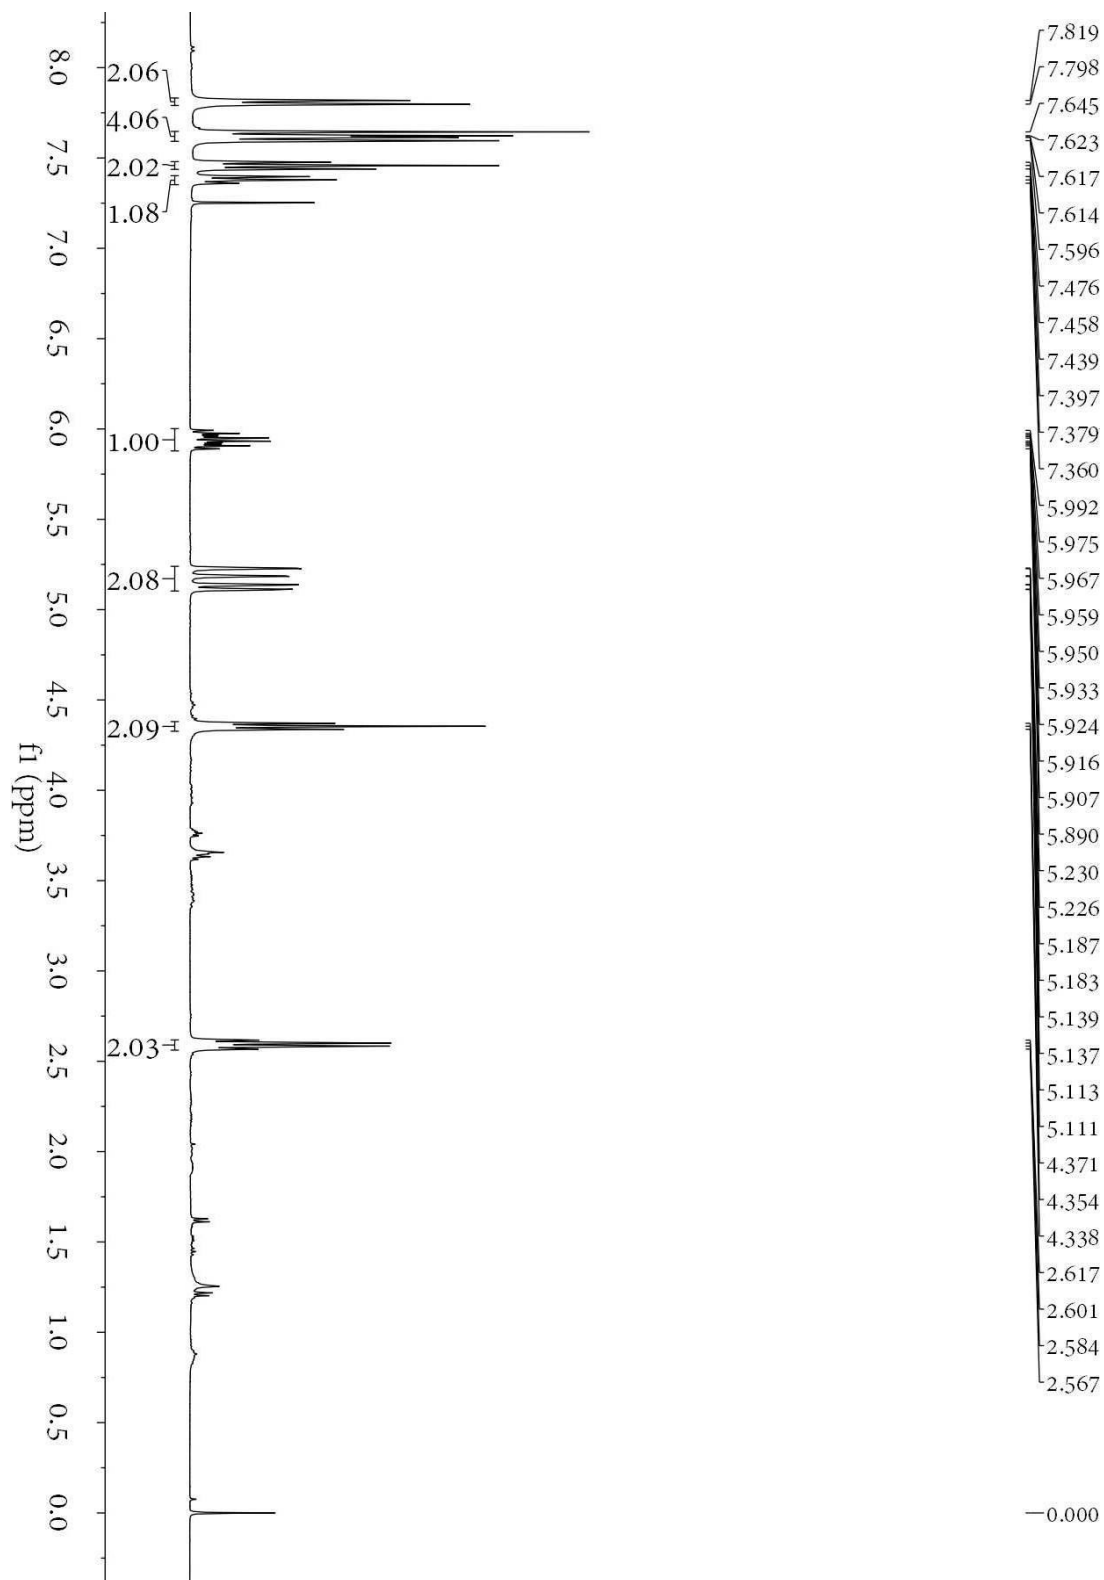

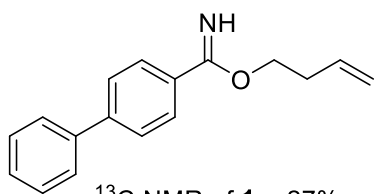

<sup>13</sup>C NMR of **1g**, 27%  
CDCl<sub>3</sub>, 150 MHz

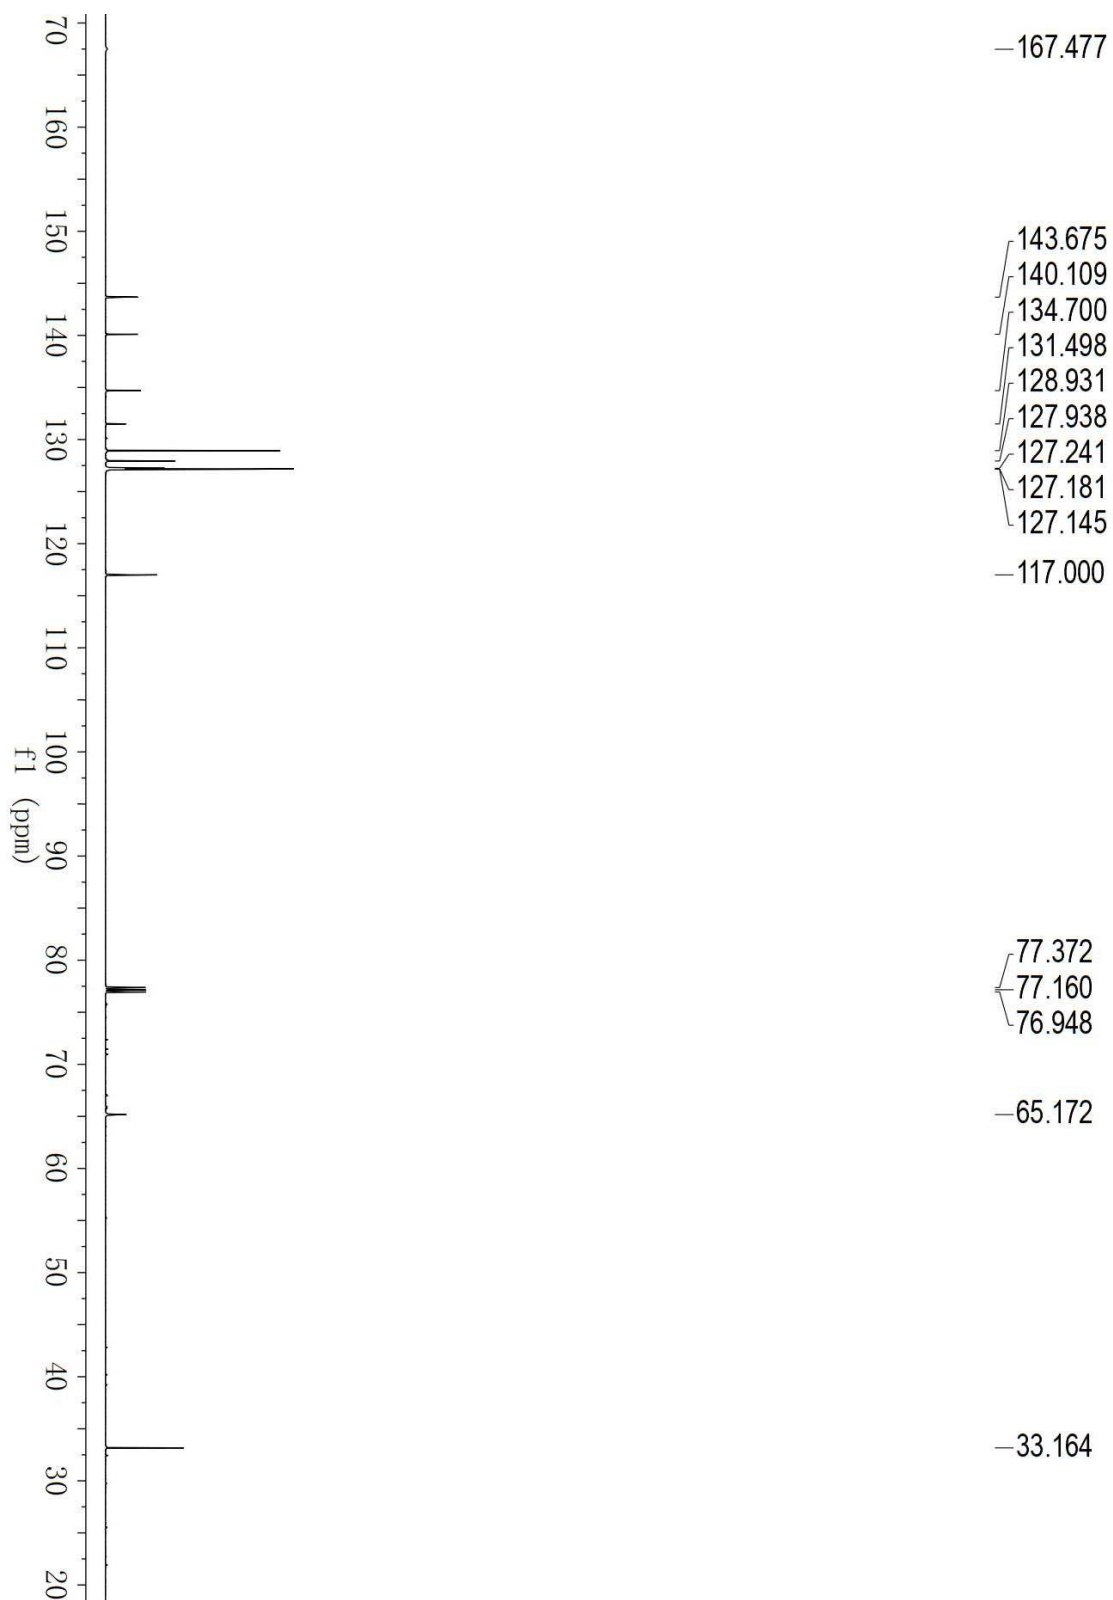

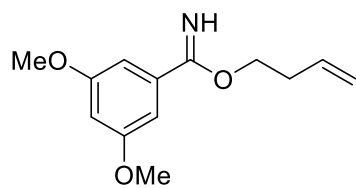

$^1\text{H}$  NMR of **1m**, 29%  
 $\text{CDCl}_3$ , 400 MHz

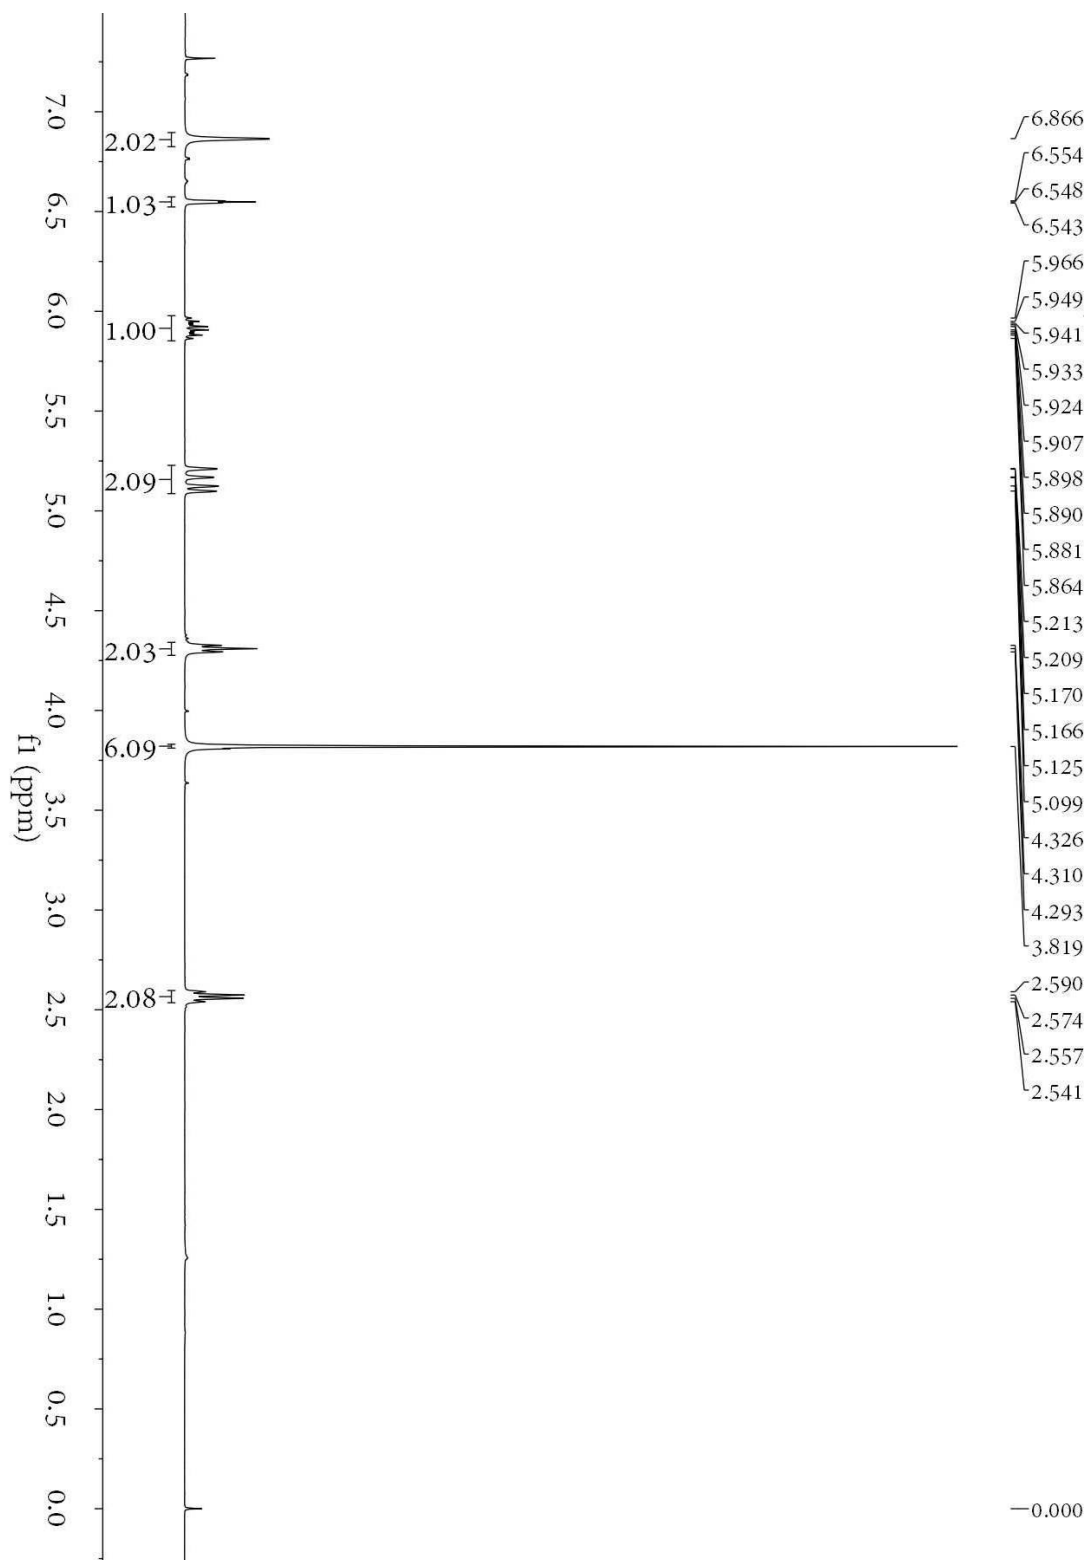

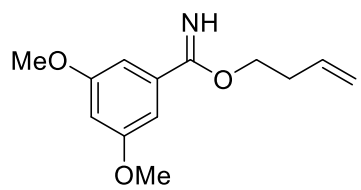

<sup>13</sup>C NMR of **1m**, 29%  
CDCl<sub>3</sub>, 100 MHz

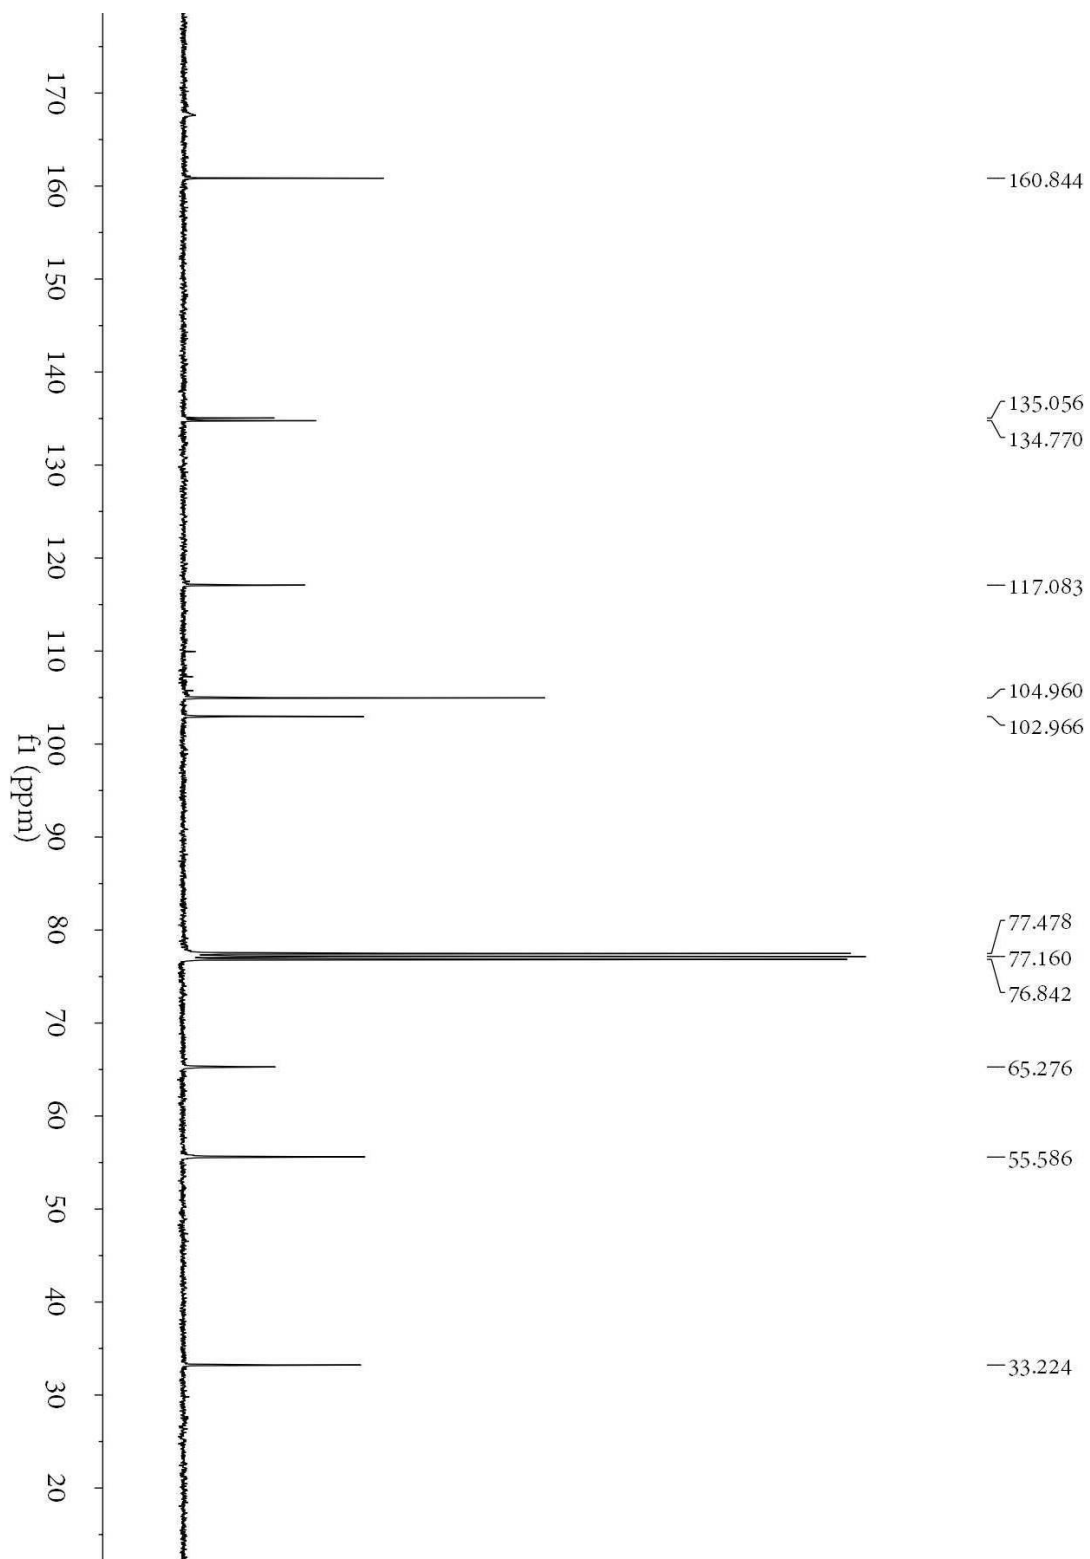

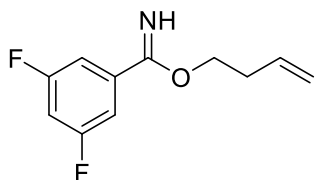

<sup>1</sup>H NMR of **1n**, 12%

CDCl<sub>3</sub>, 400 MHz

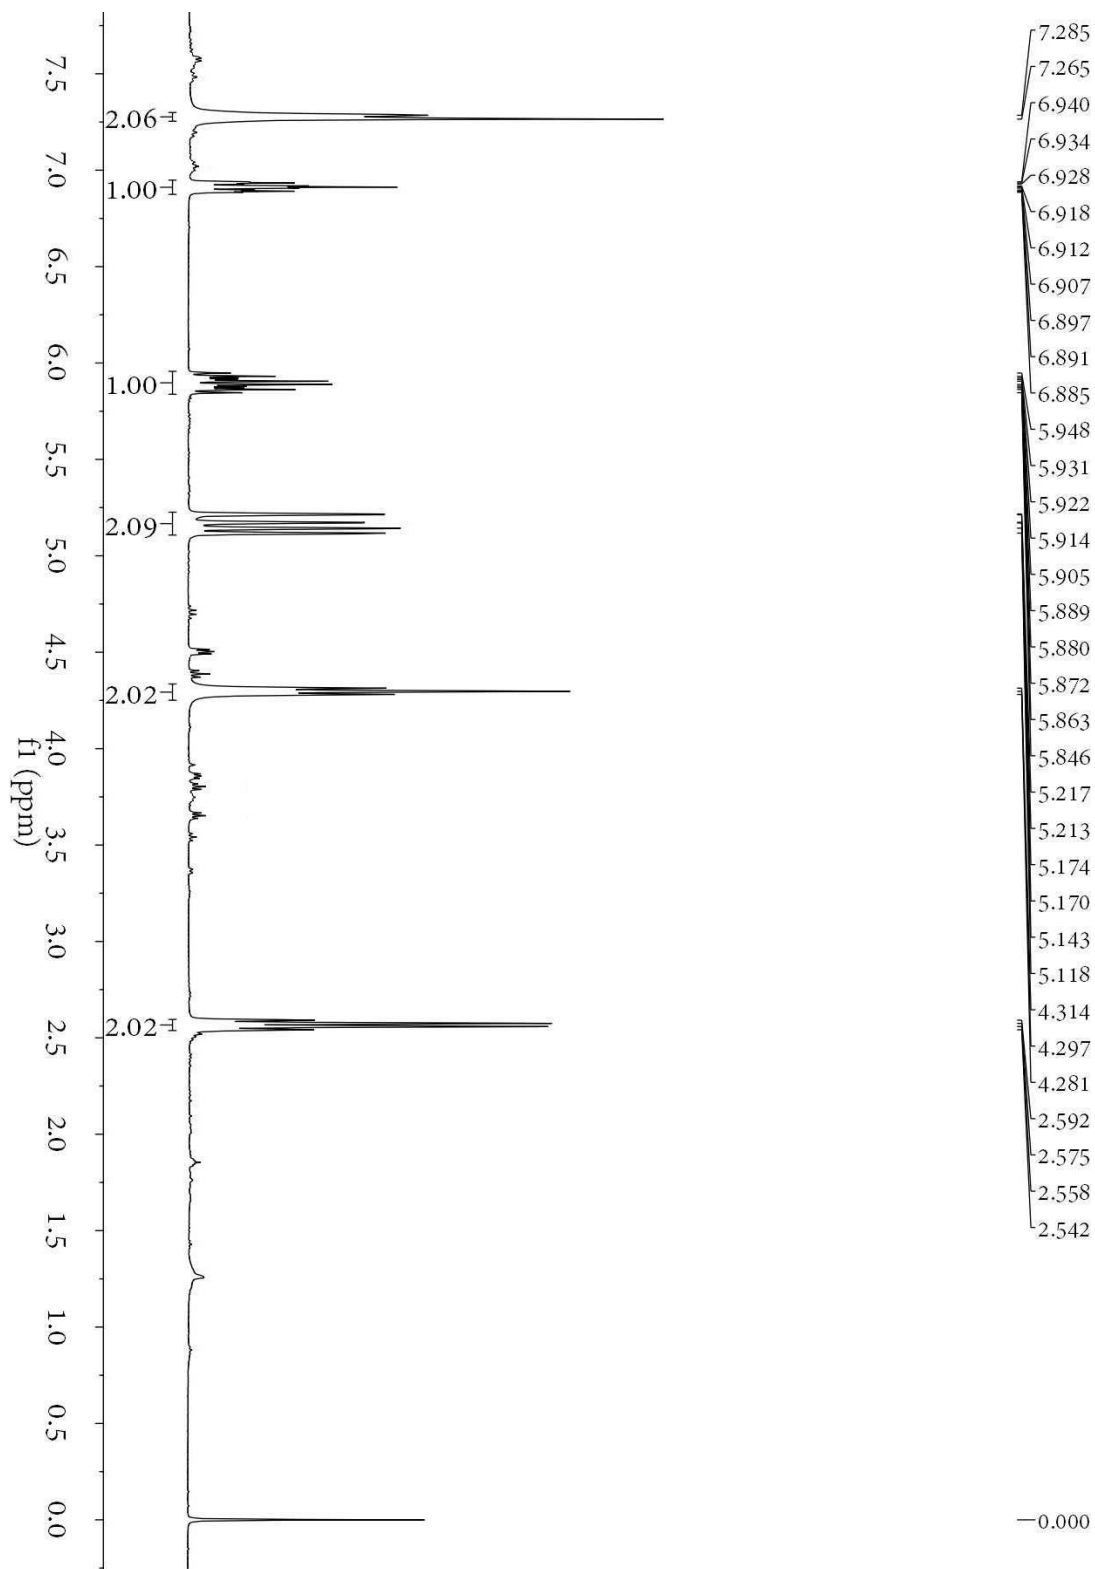

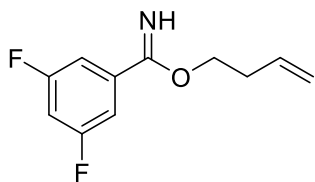

$^{13}\text{C}$  NMR of **1n**, 12%  
 $\text{CDCl}_3$ , 100 MHz

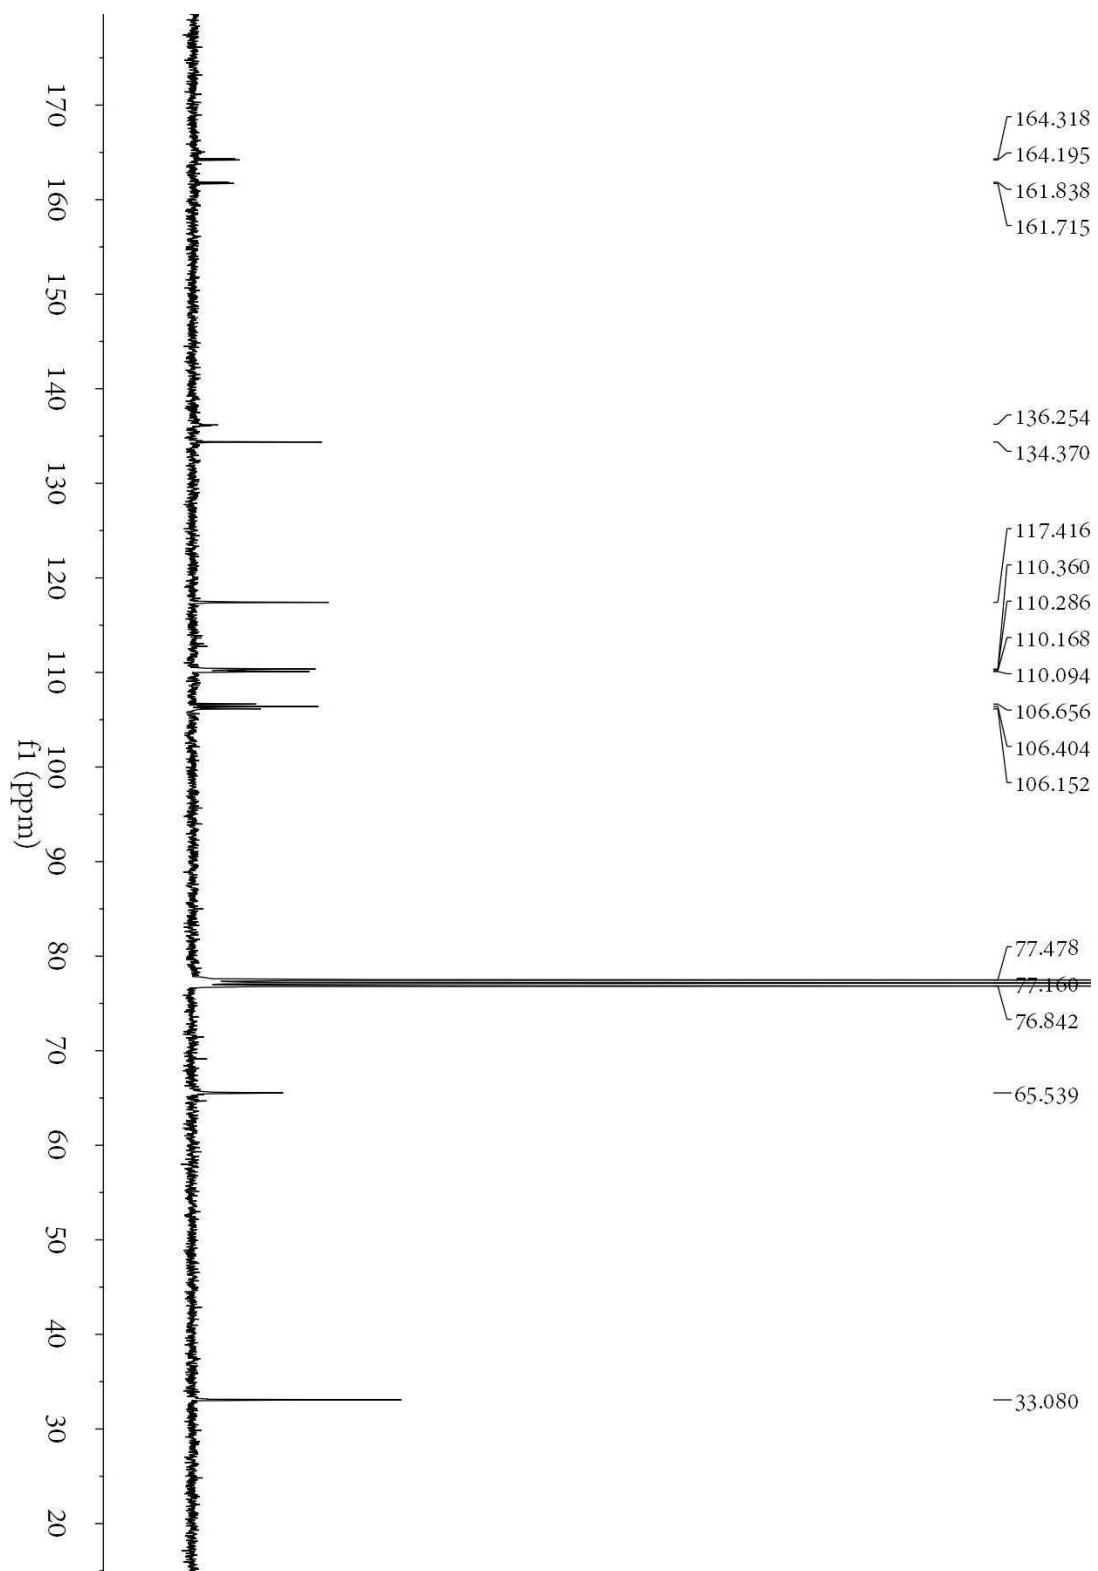

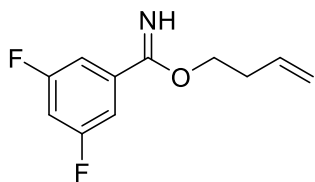

<sup>19</sup>F NMR of **1n**, 12%  
CDCl<sub>3</sub>, 564 MHz

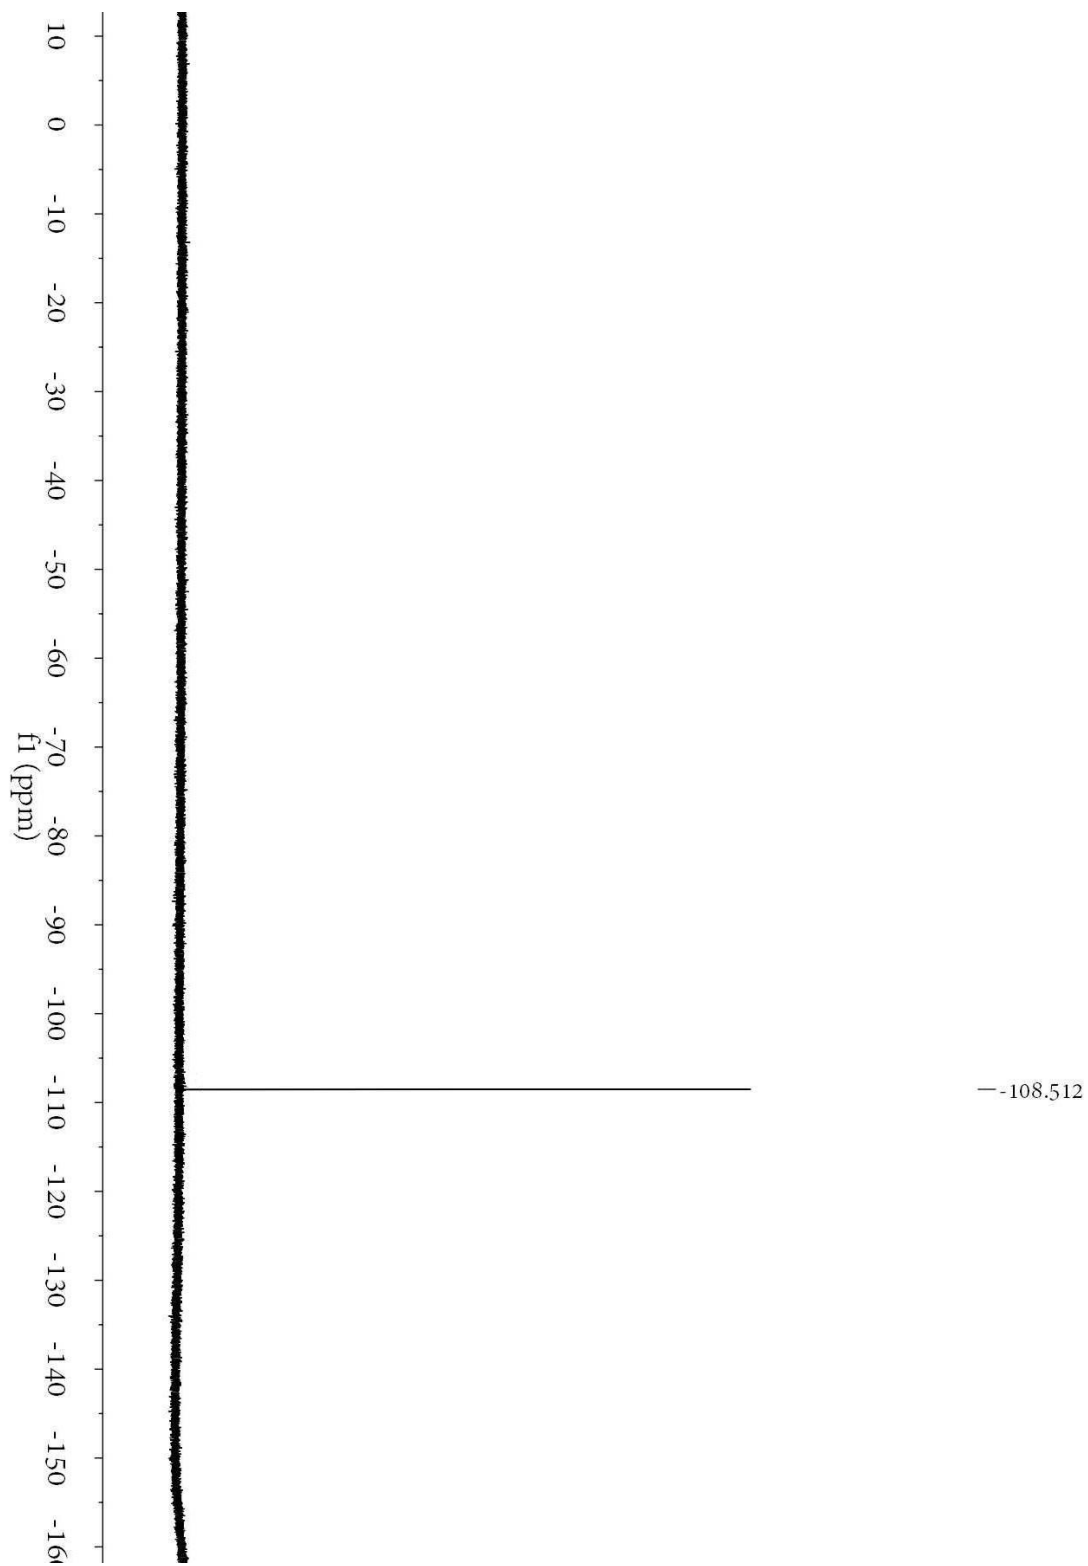

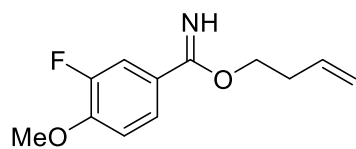

$^1\text{H}$  NMR of **1o**, 35%  
 $\text{CDCl}_3$ , 400 MHz

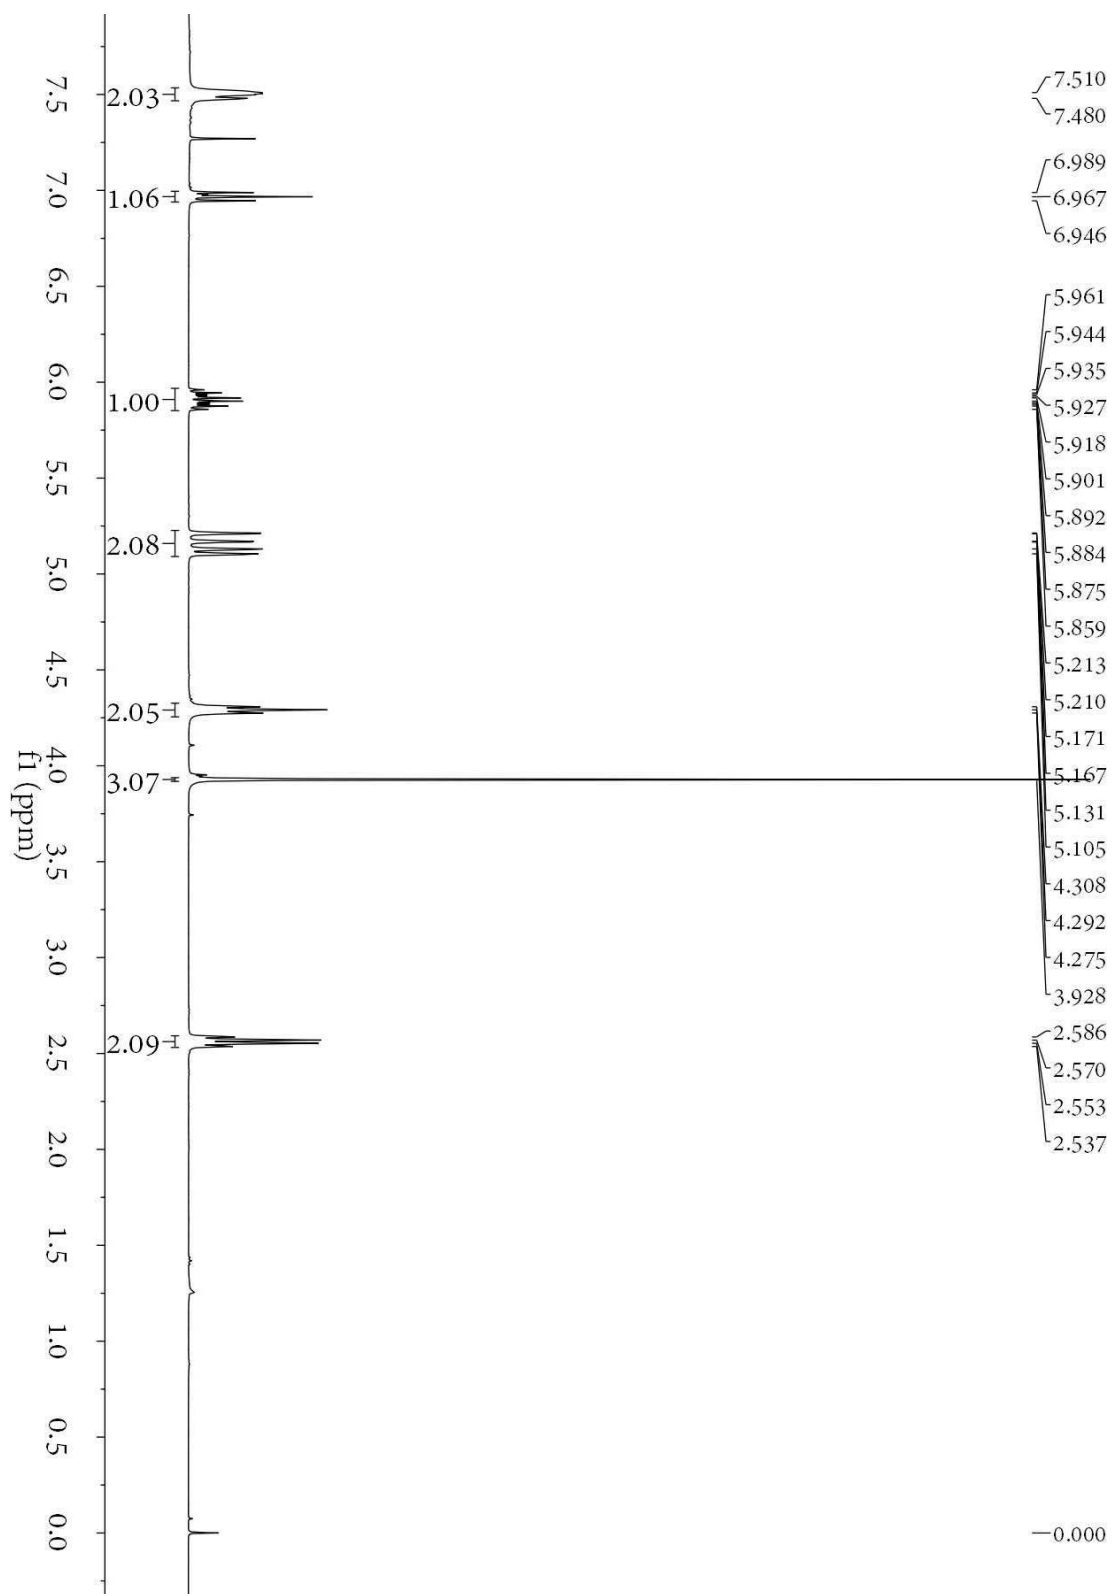



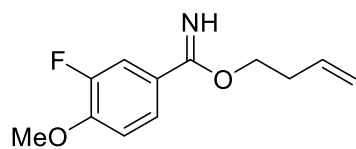

$^{13}\text{C}$  NMR of **1o**, 35%  
 $\text{CDCl}_3$ , 100 MHz

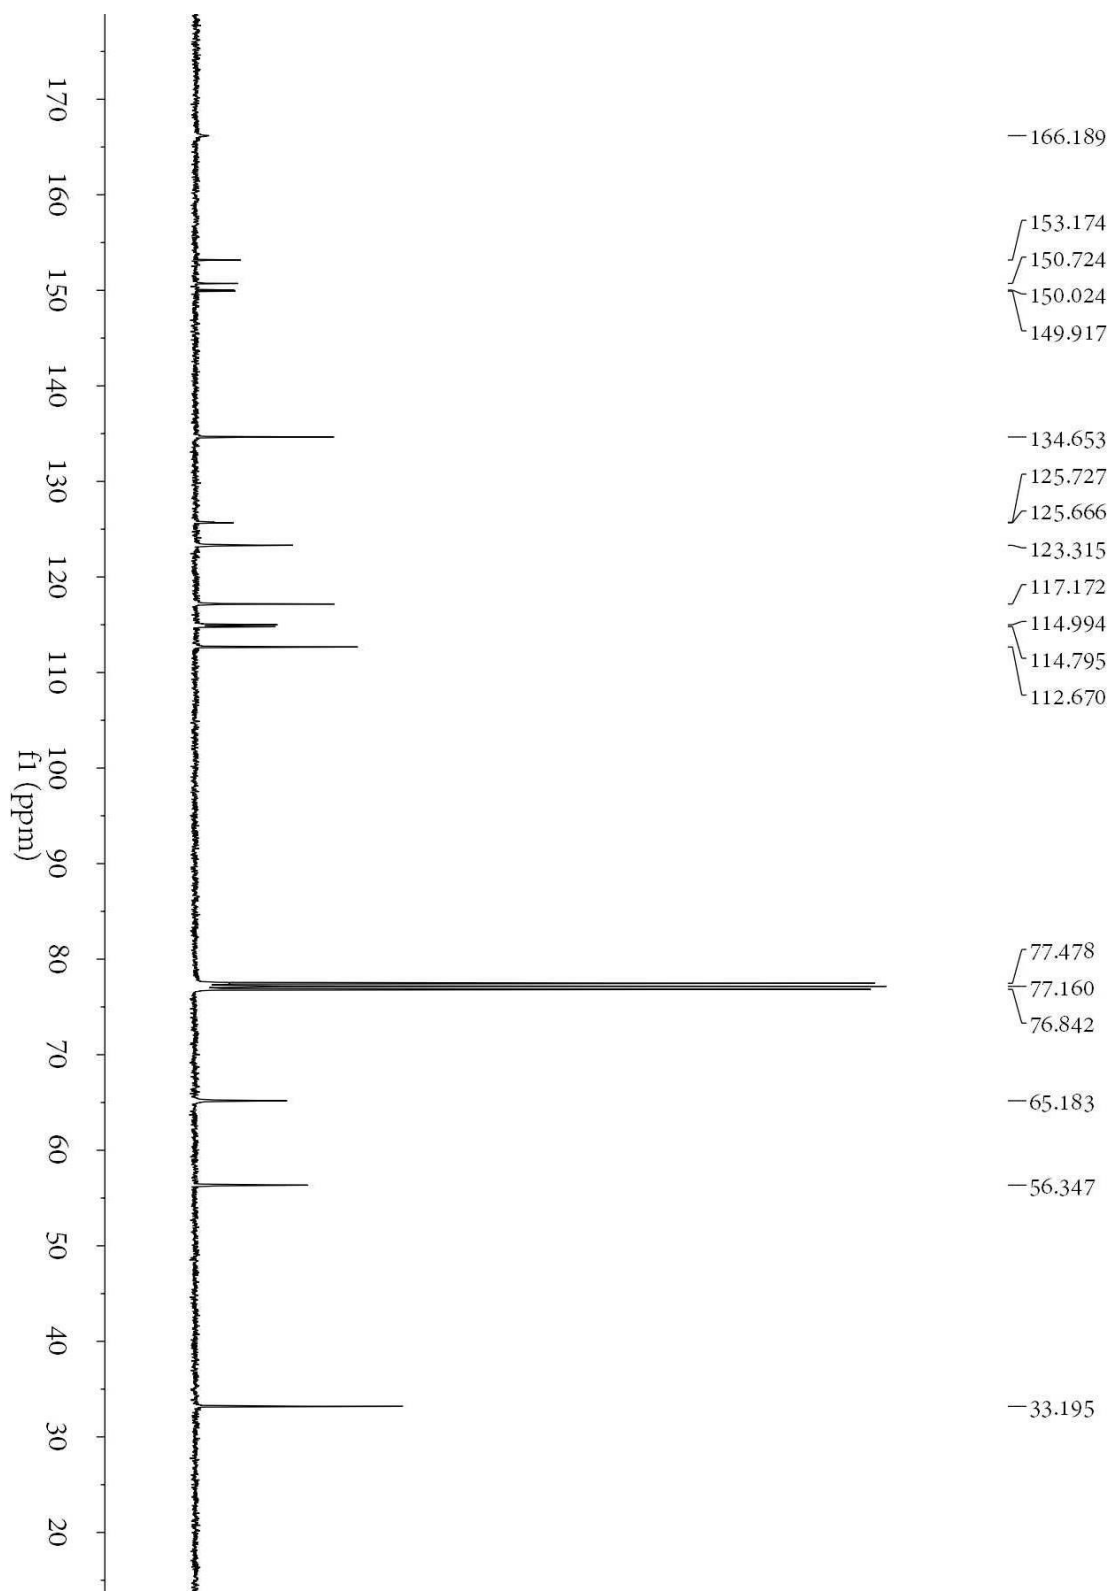

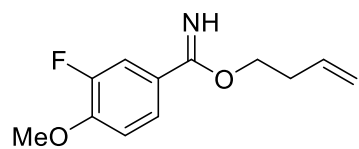

$^{19}\text{F}$  NMR of **1o**, 35%  
 $\text{CDCl}_3$ , 564 MHz

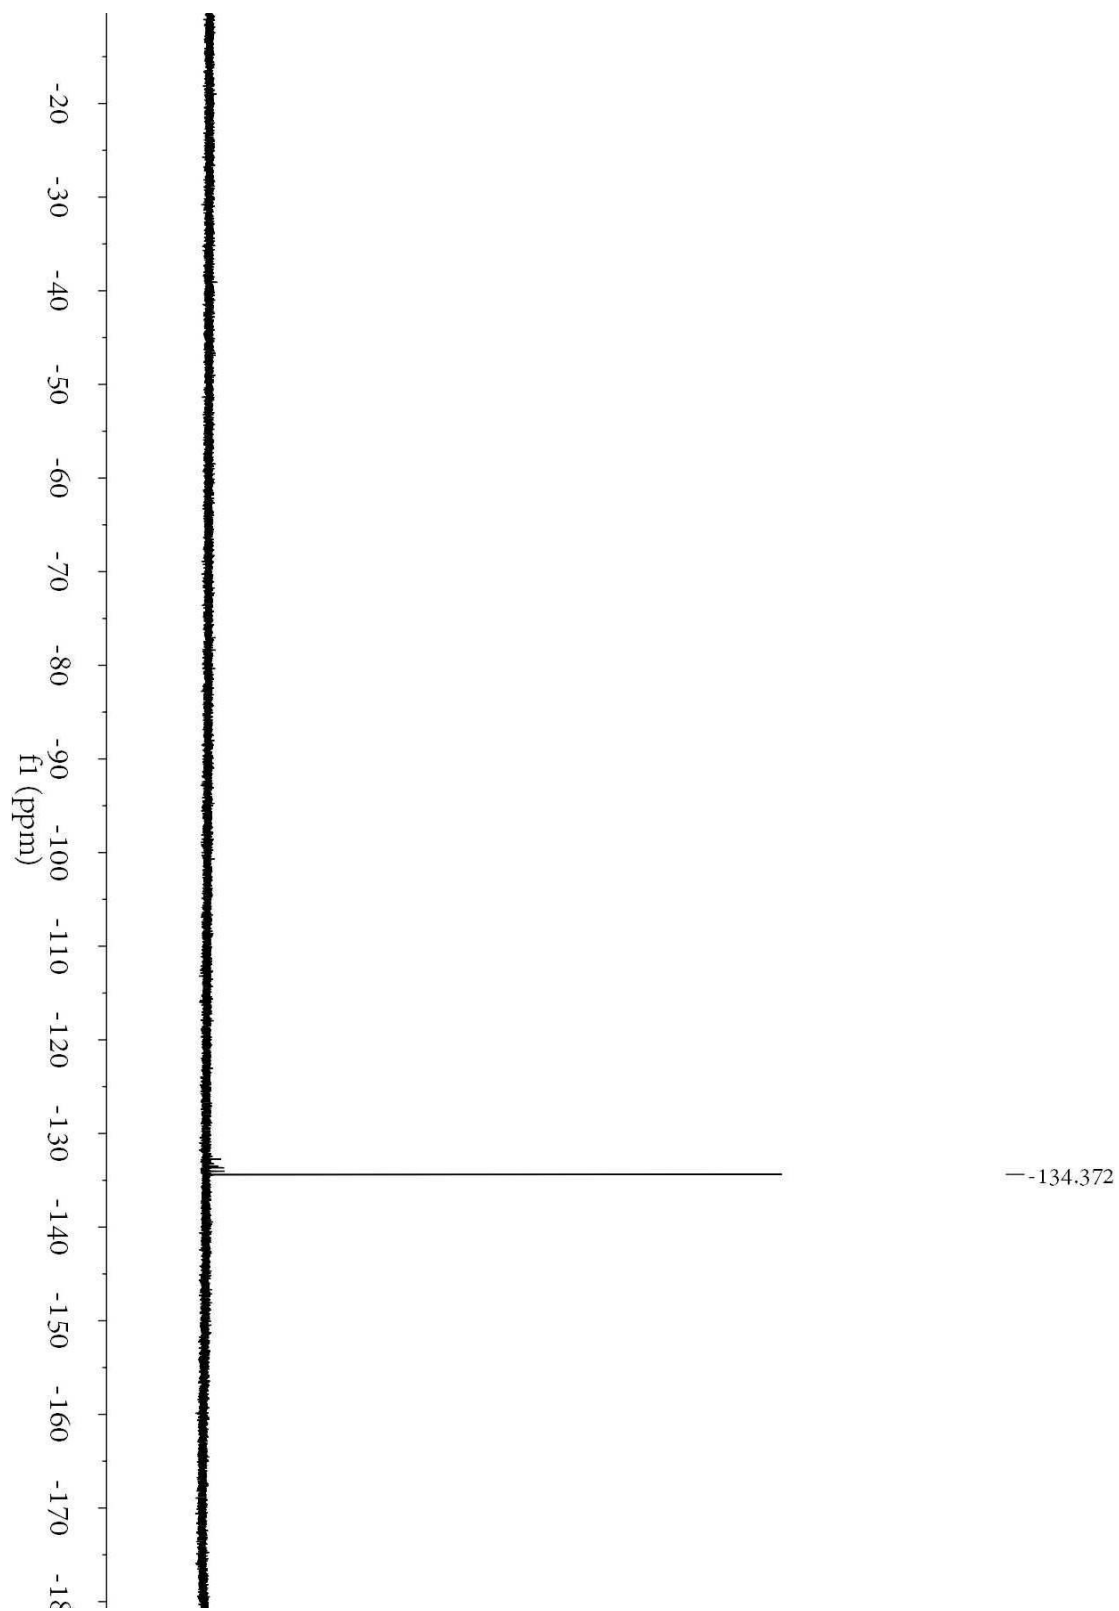

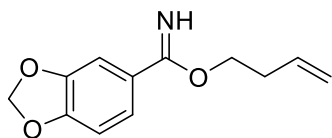

$^1\text{H}$  NMR of **1p**, 29%

$\text{CDCl}_3$ , 400 MHz

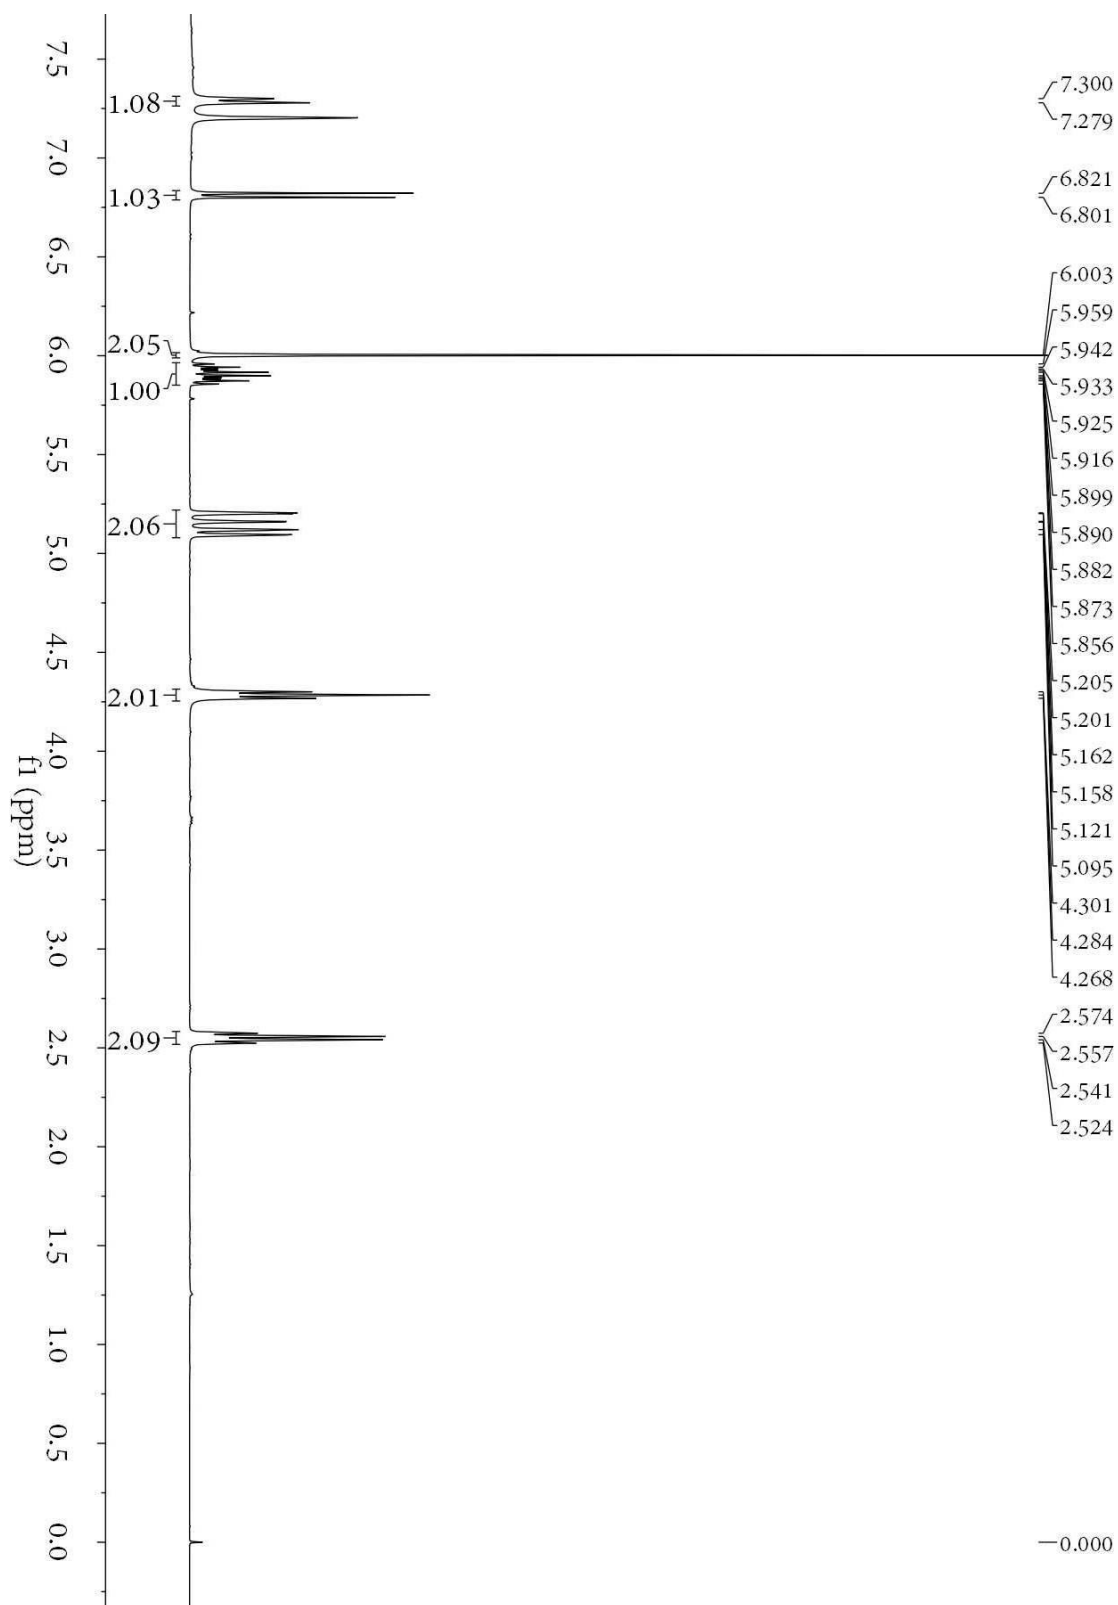

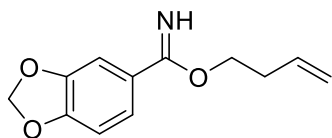

$^{13}\text{C}$  NMR of **1p**, 29%

$\text{CDCl}_3$ , 100 MHz

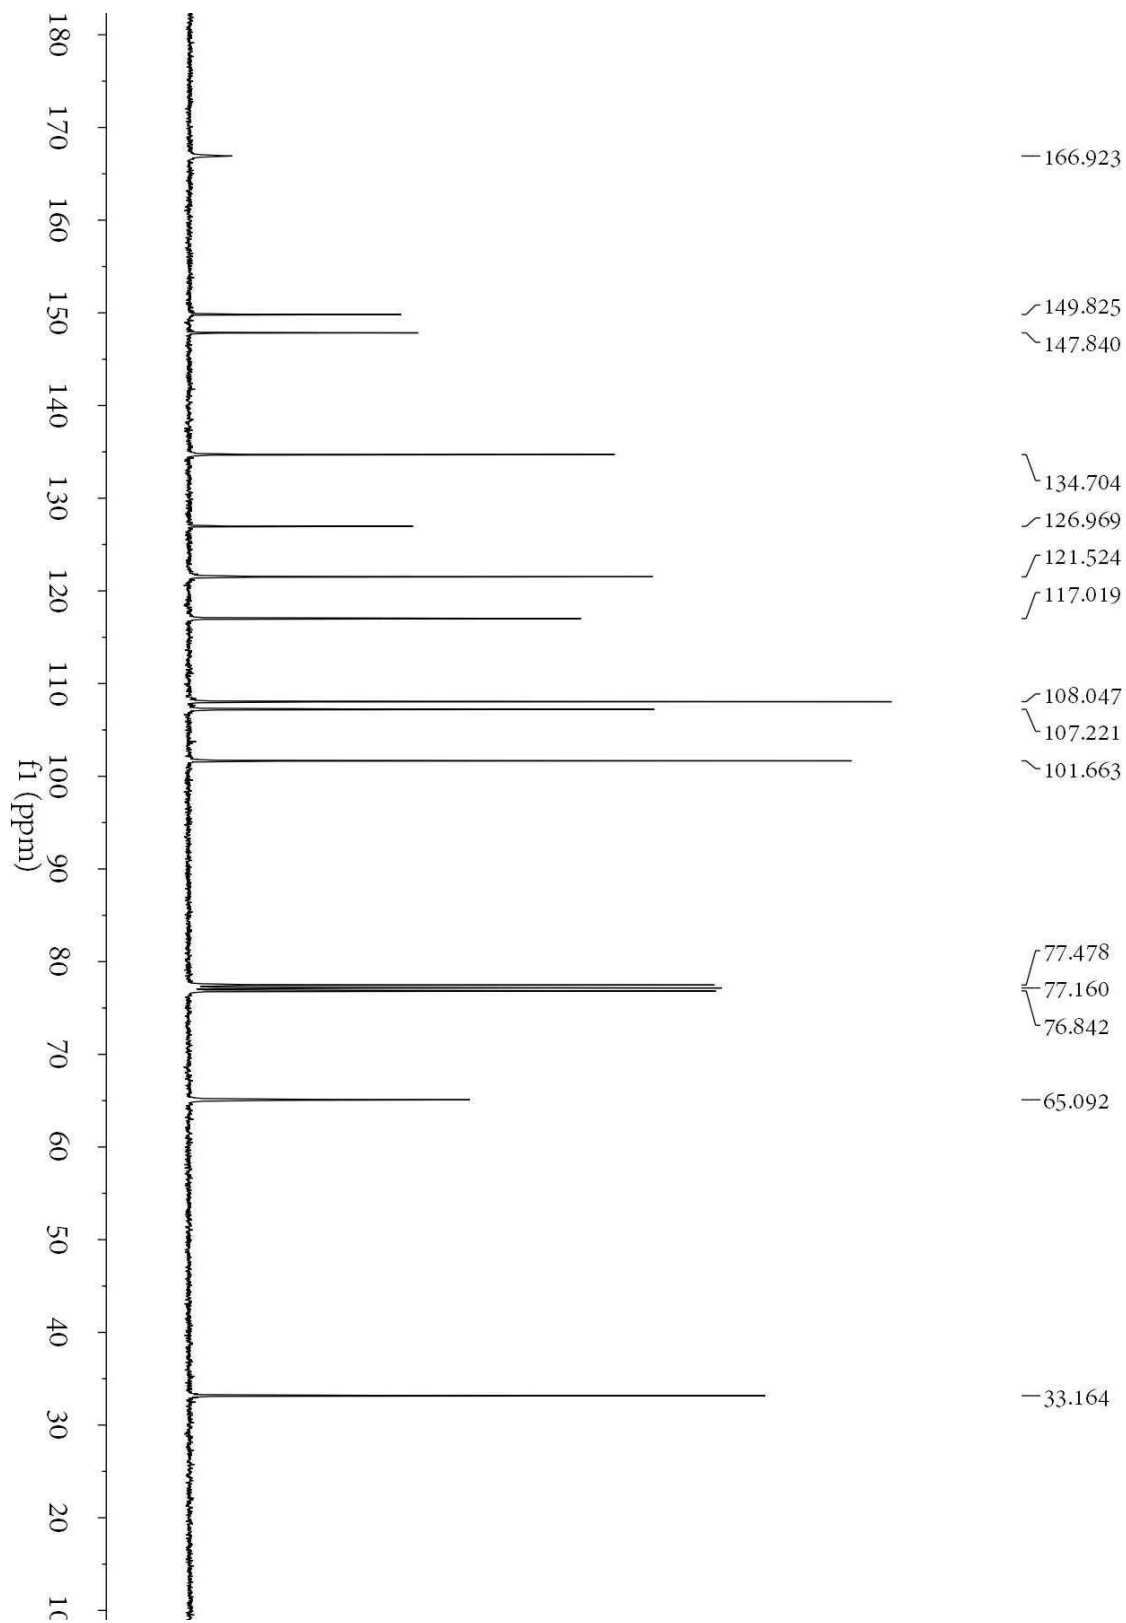

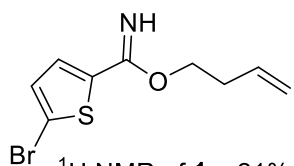

<sup>1</sup>H NMR of **1s**, 21%  
CDCl<sub>3</sub>, 400 MHz

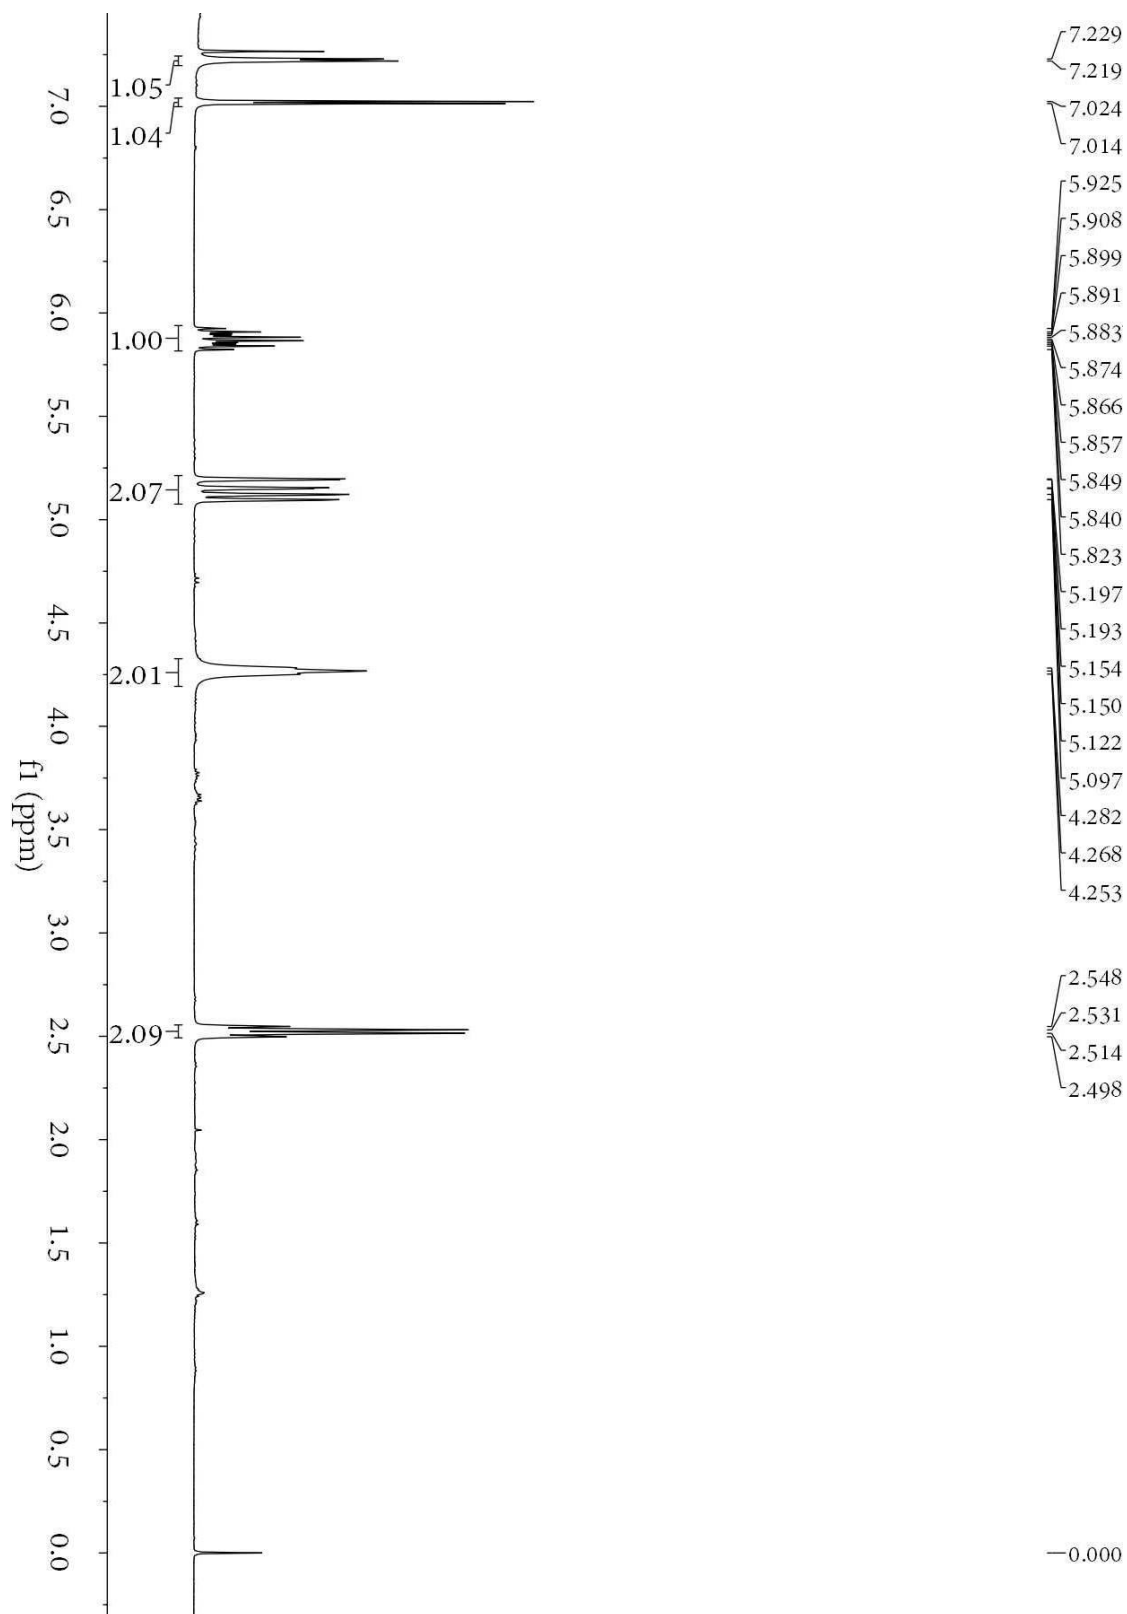

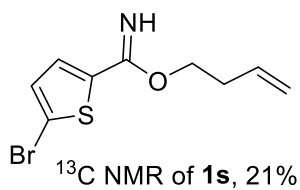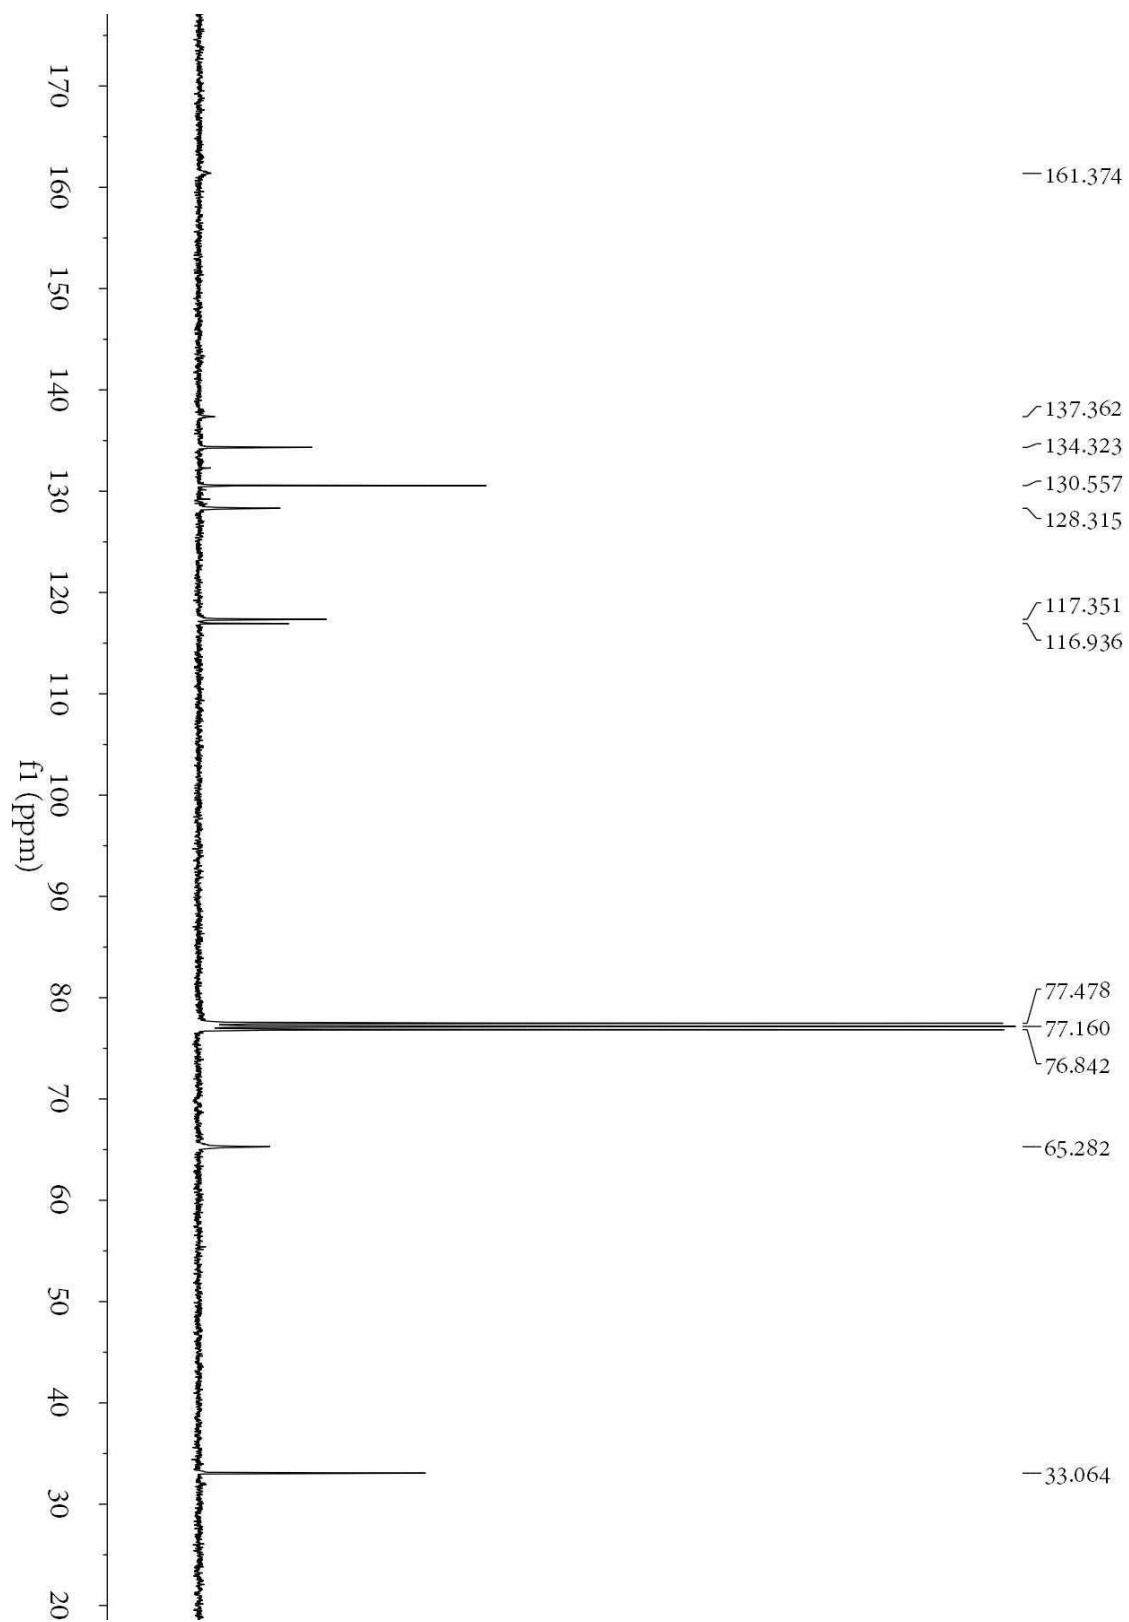

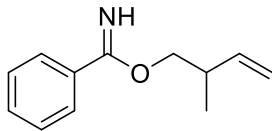

<sup>1</sup>H NMR of **1u**, 21%  
CDCl<sub>3</sub>, 600 MHz

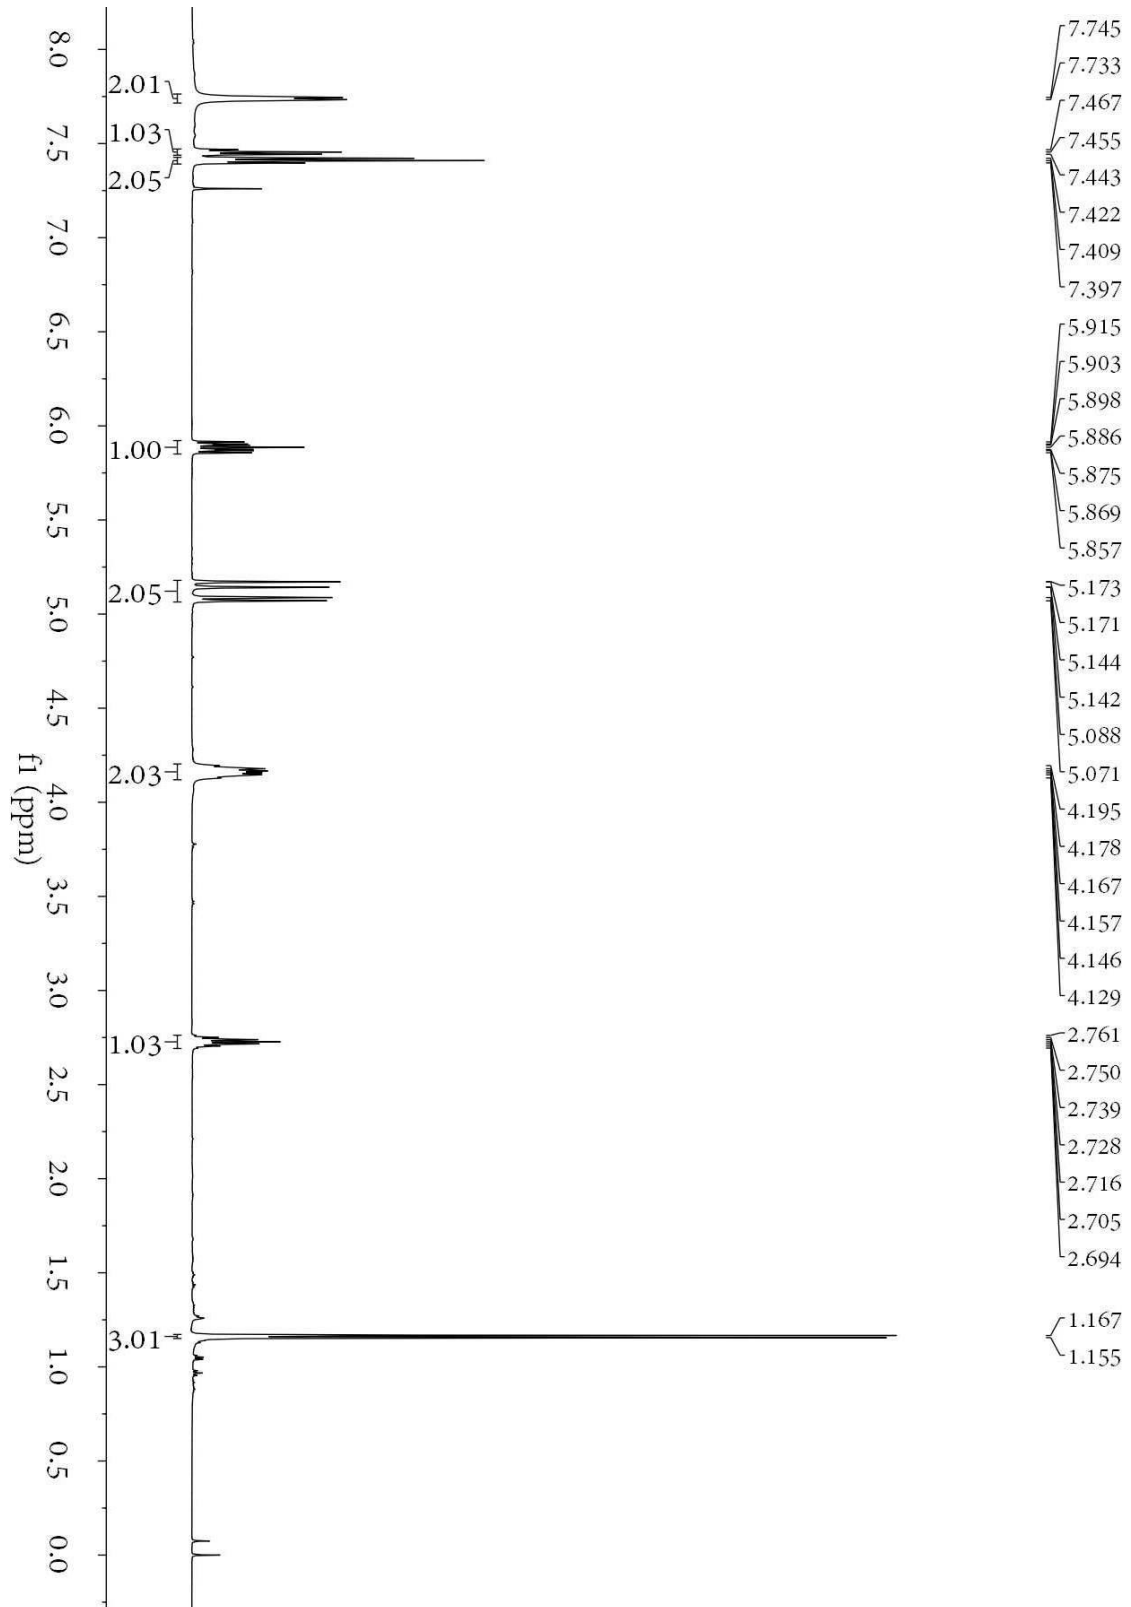

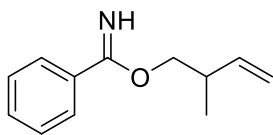

$^{13}\text{C}$  NMR of **1u**, 21%  
 $\text{CDCl}_3$ , 150 MHz

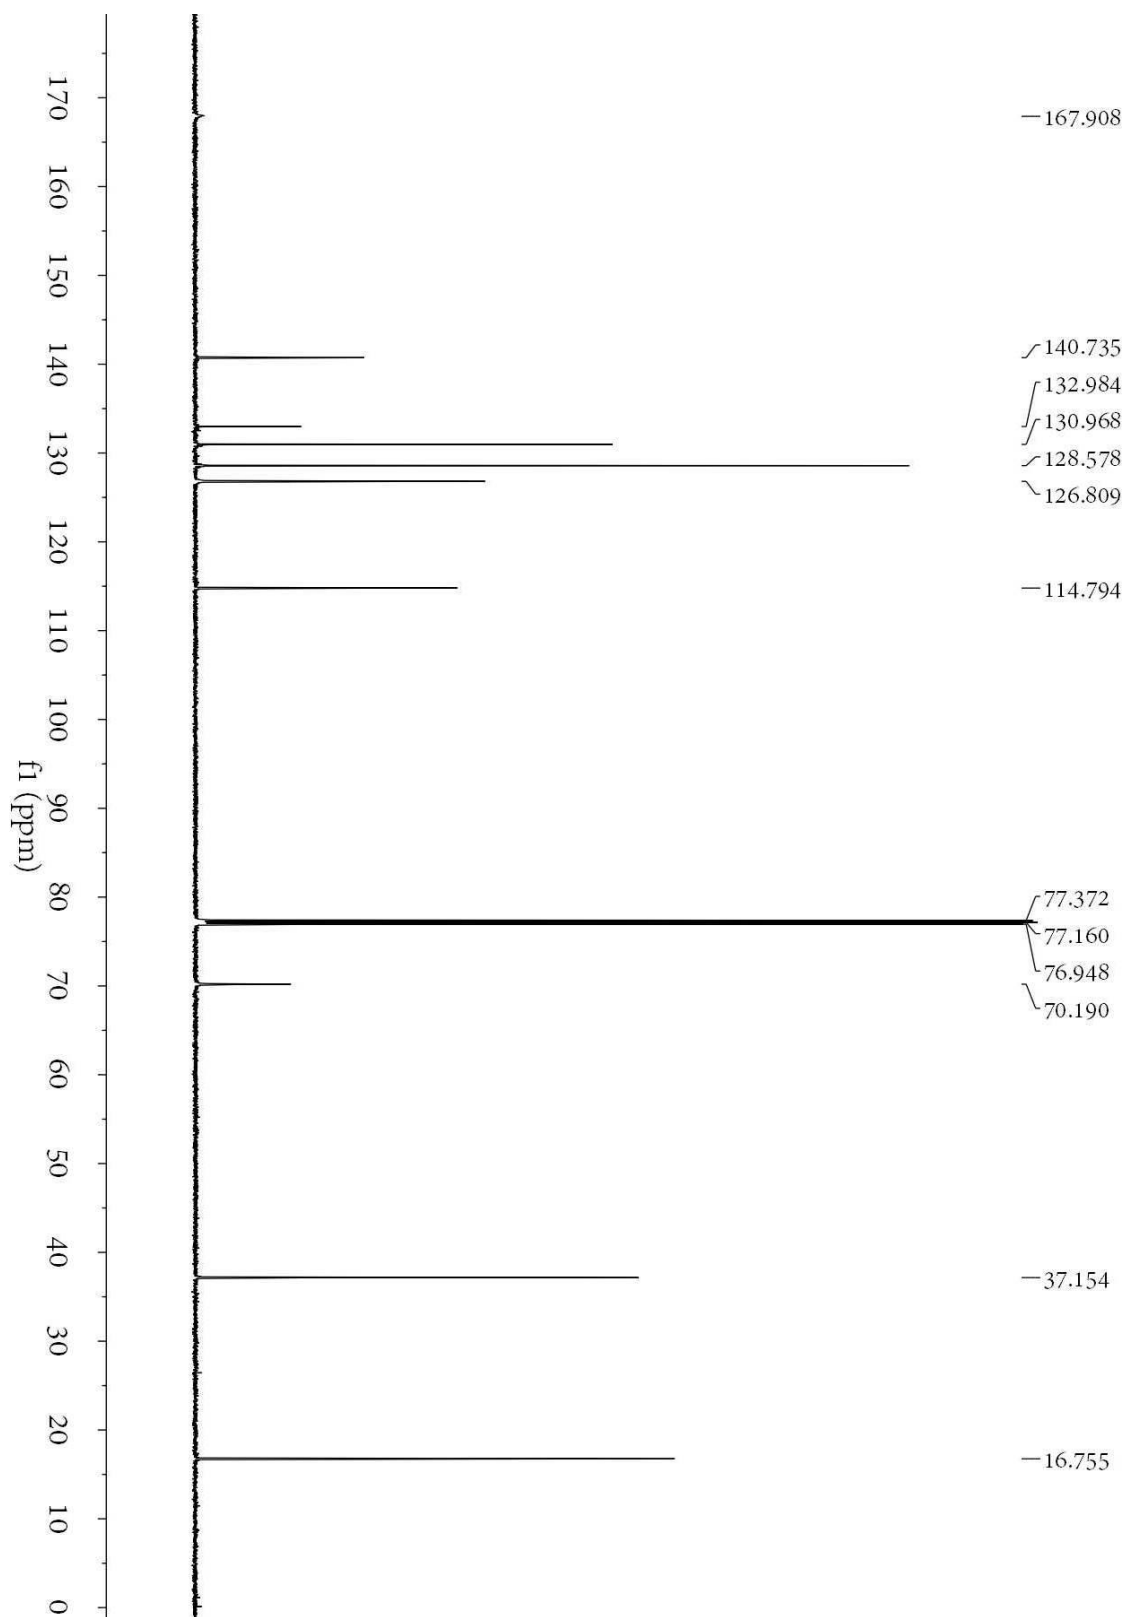



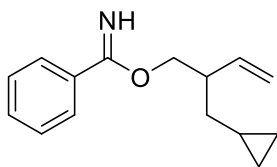

$^1\text{H}$  NMR of **1v**, 37%

$\text{CDCl}_3$ , 400 MHz

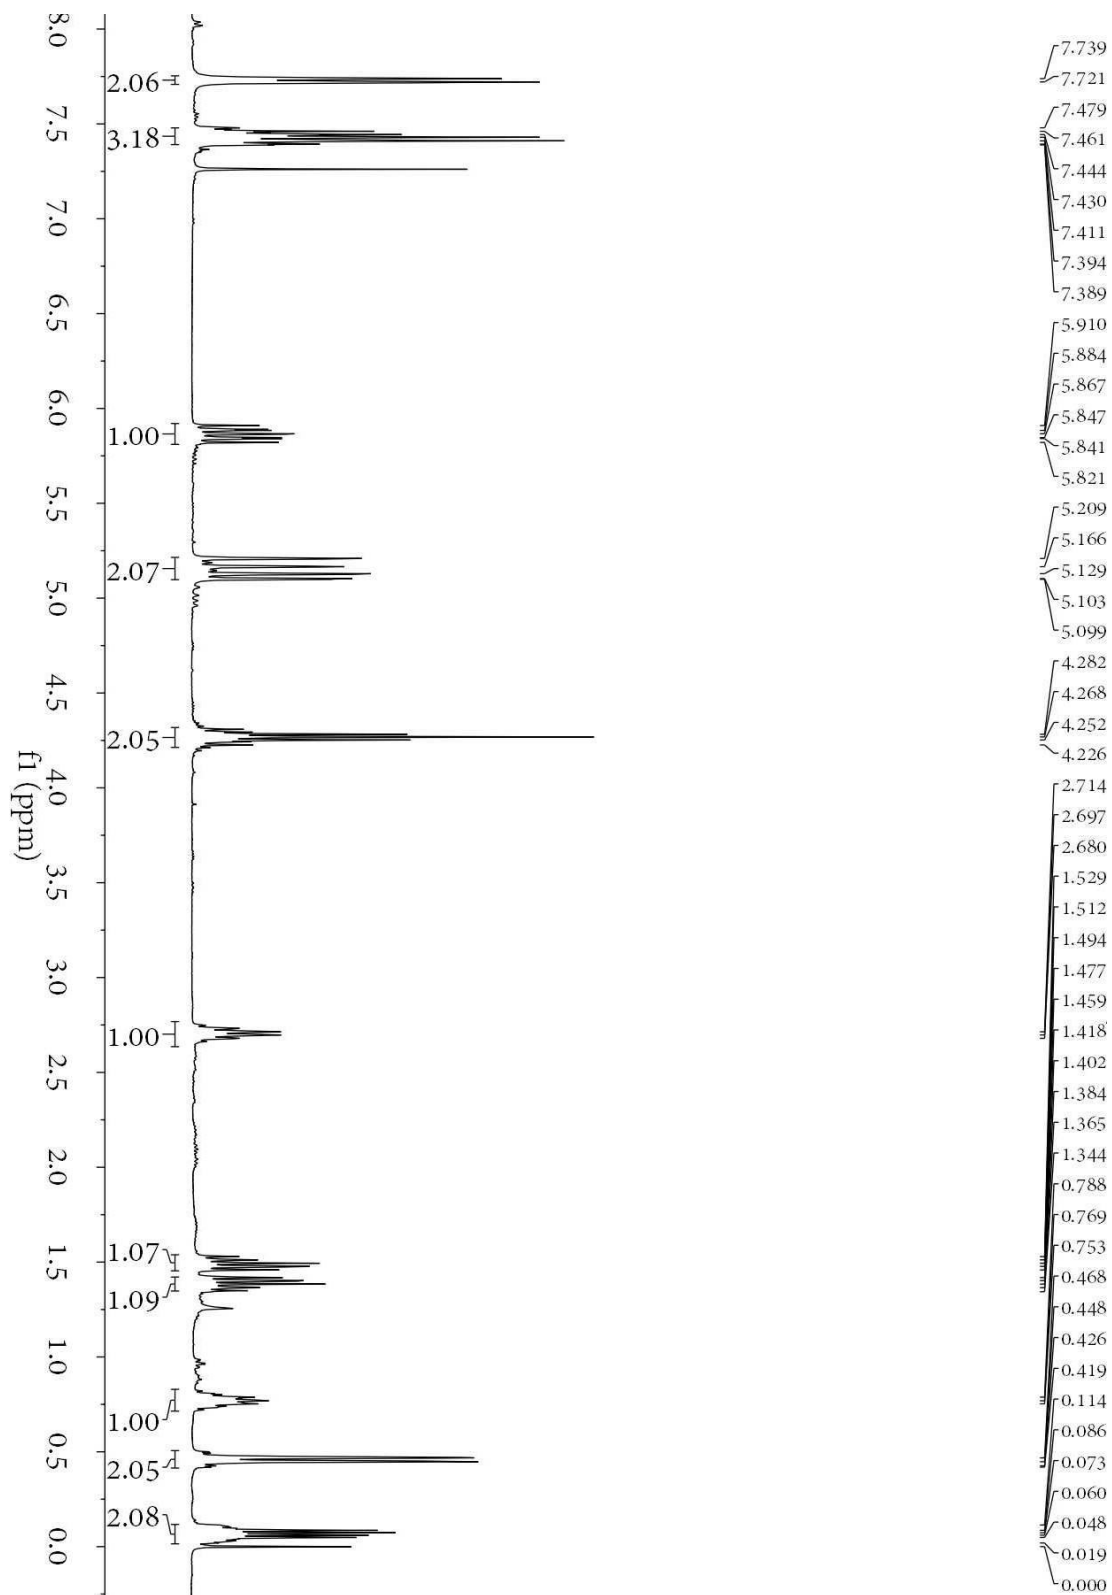

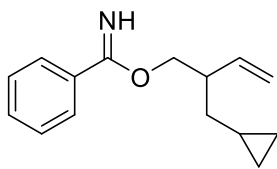

$^{13}\text{C}$  NMR of **1v**, 37%  
 $\text{CDCl}_3$ , 100 MHz

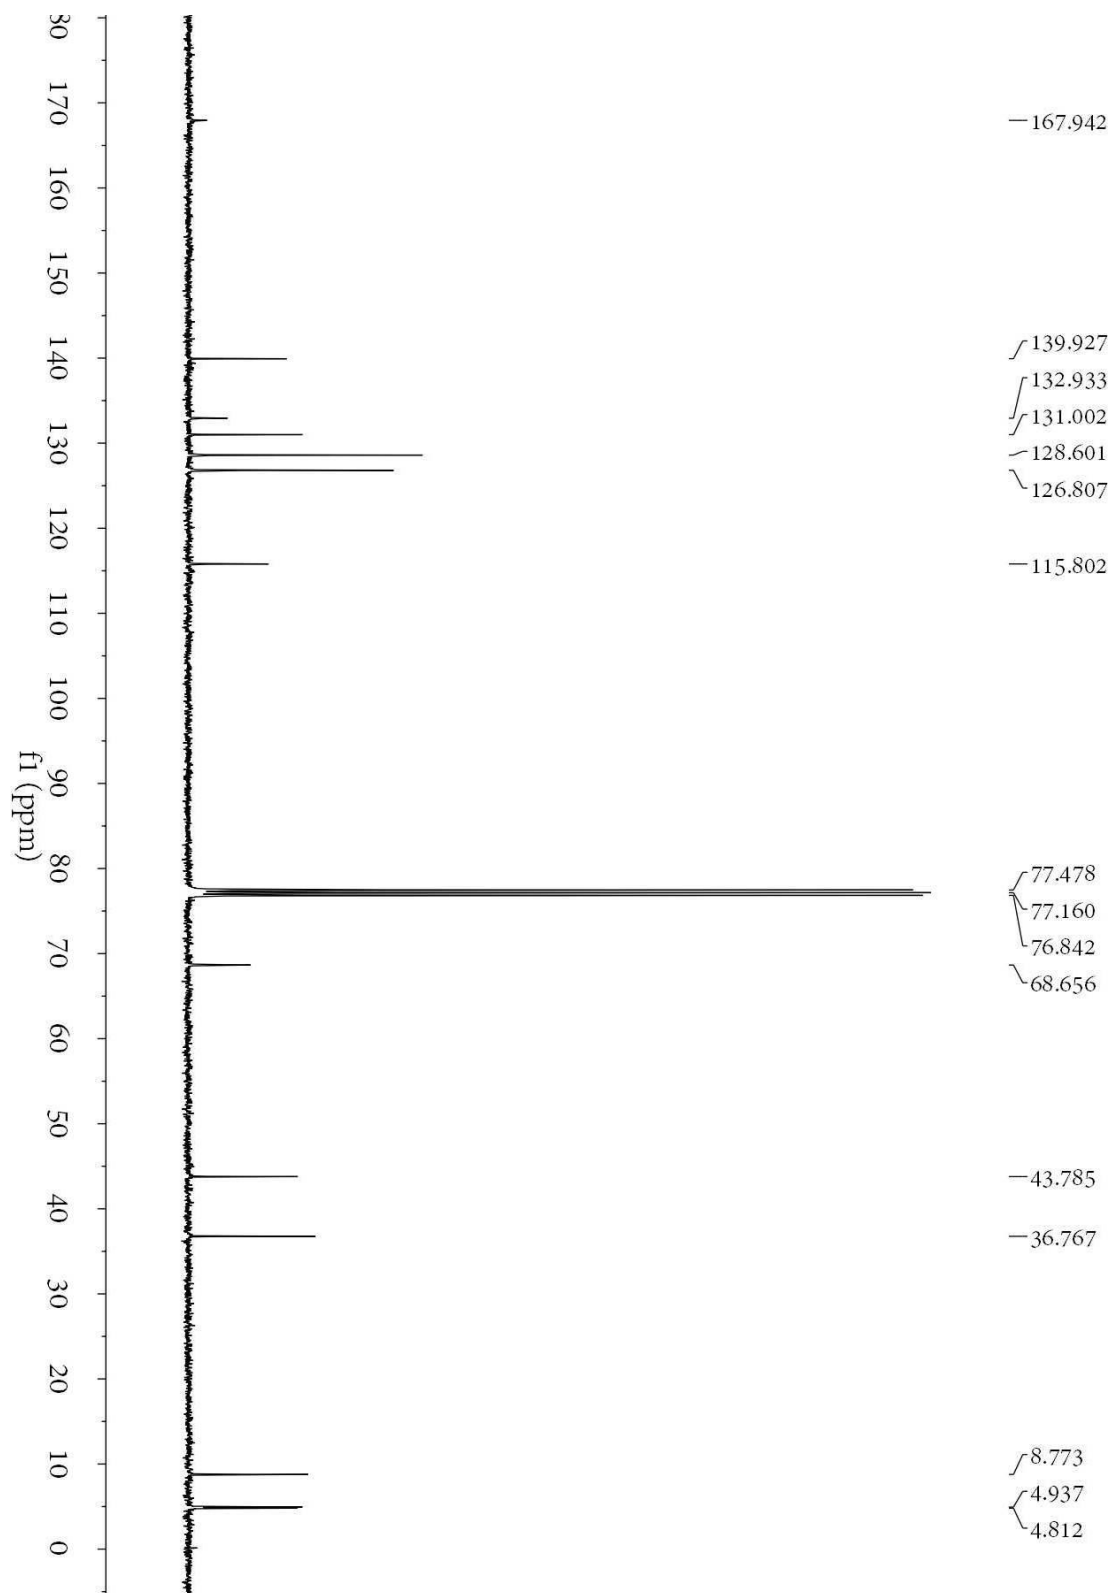

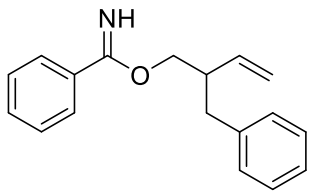

$^1\text{H}$  NMR of **1w**, 48%  
 $\text{CDCl}_3$ , 600 MHz

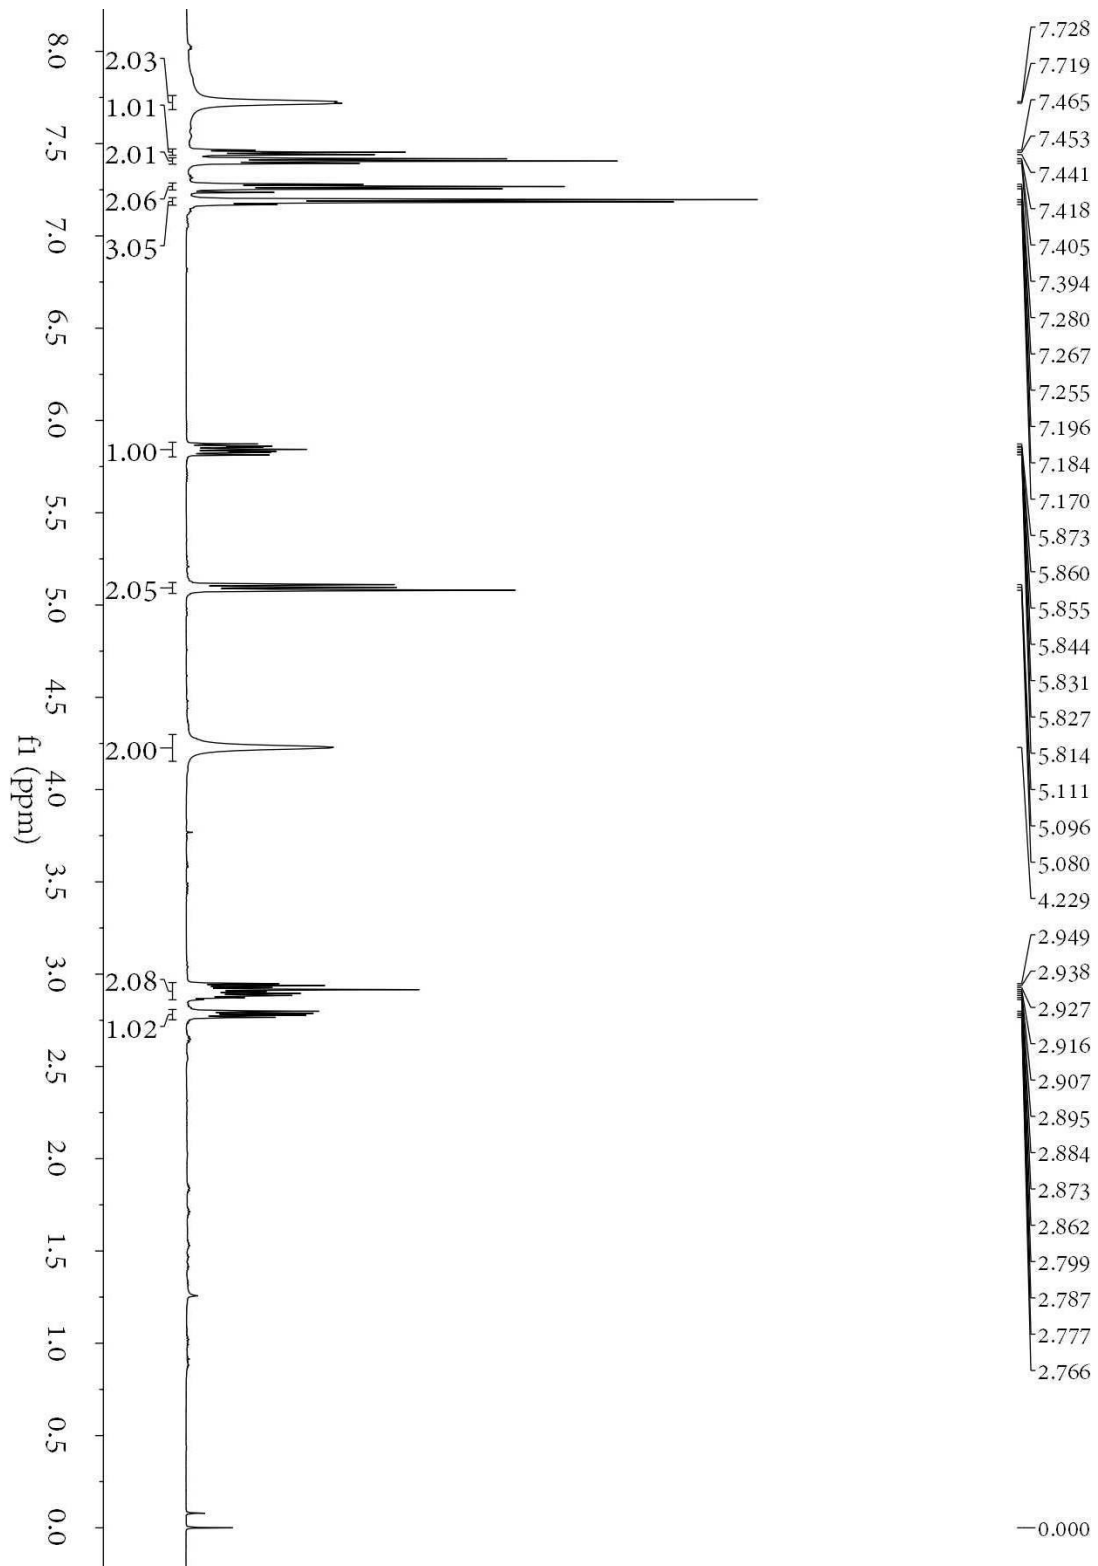

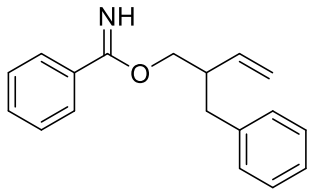

$^{13}\text{C}$  NMR of **1w**, 48%

$\text{CDCl}_3$ , 150 MHz

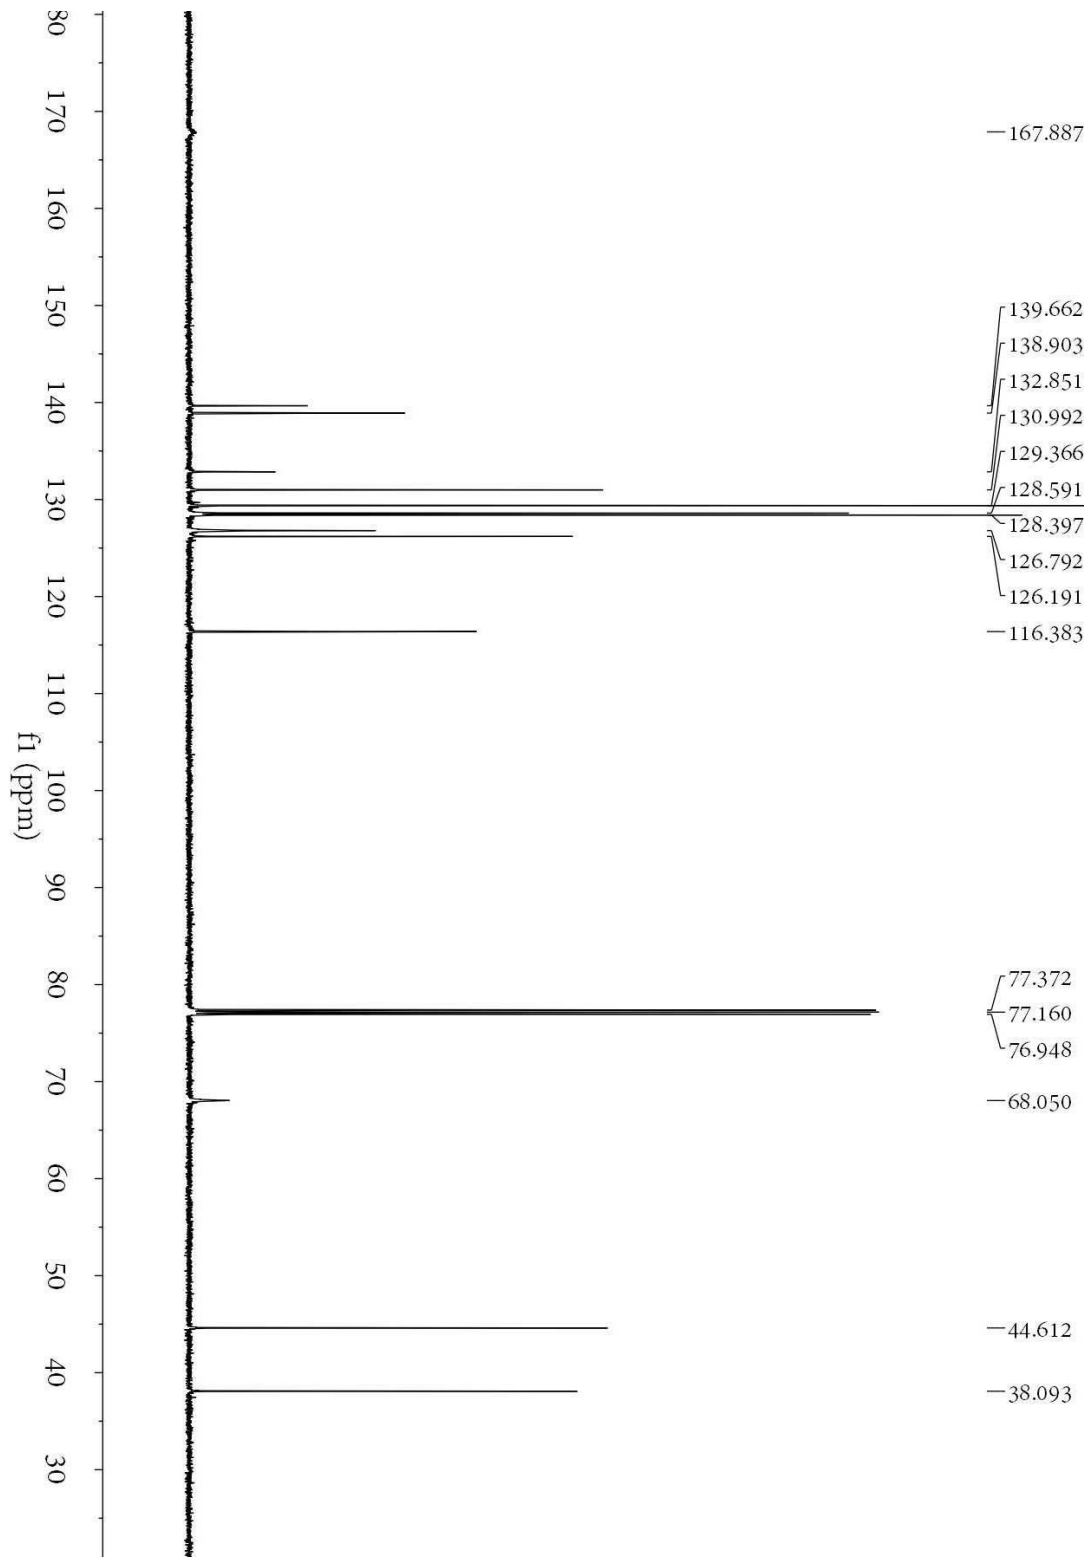

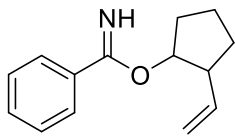

$^1\text{H}$  NMR of **1x**, 27%  
 $\text{CDCl}_3$ , 400 MHz

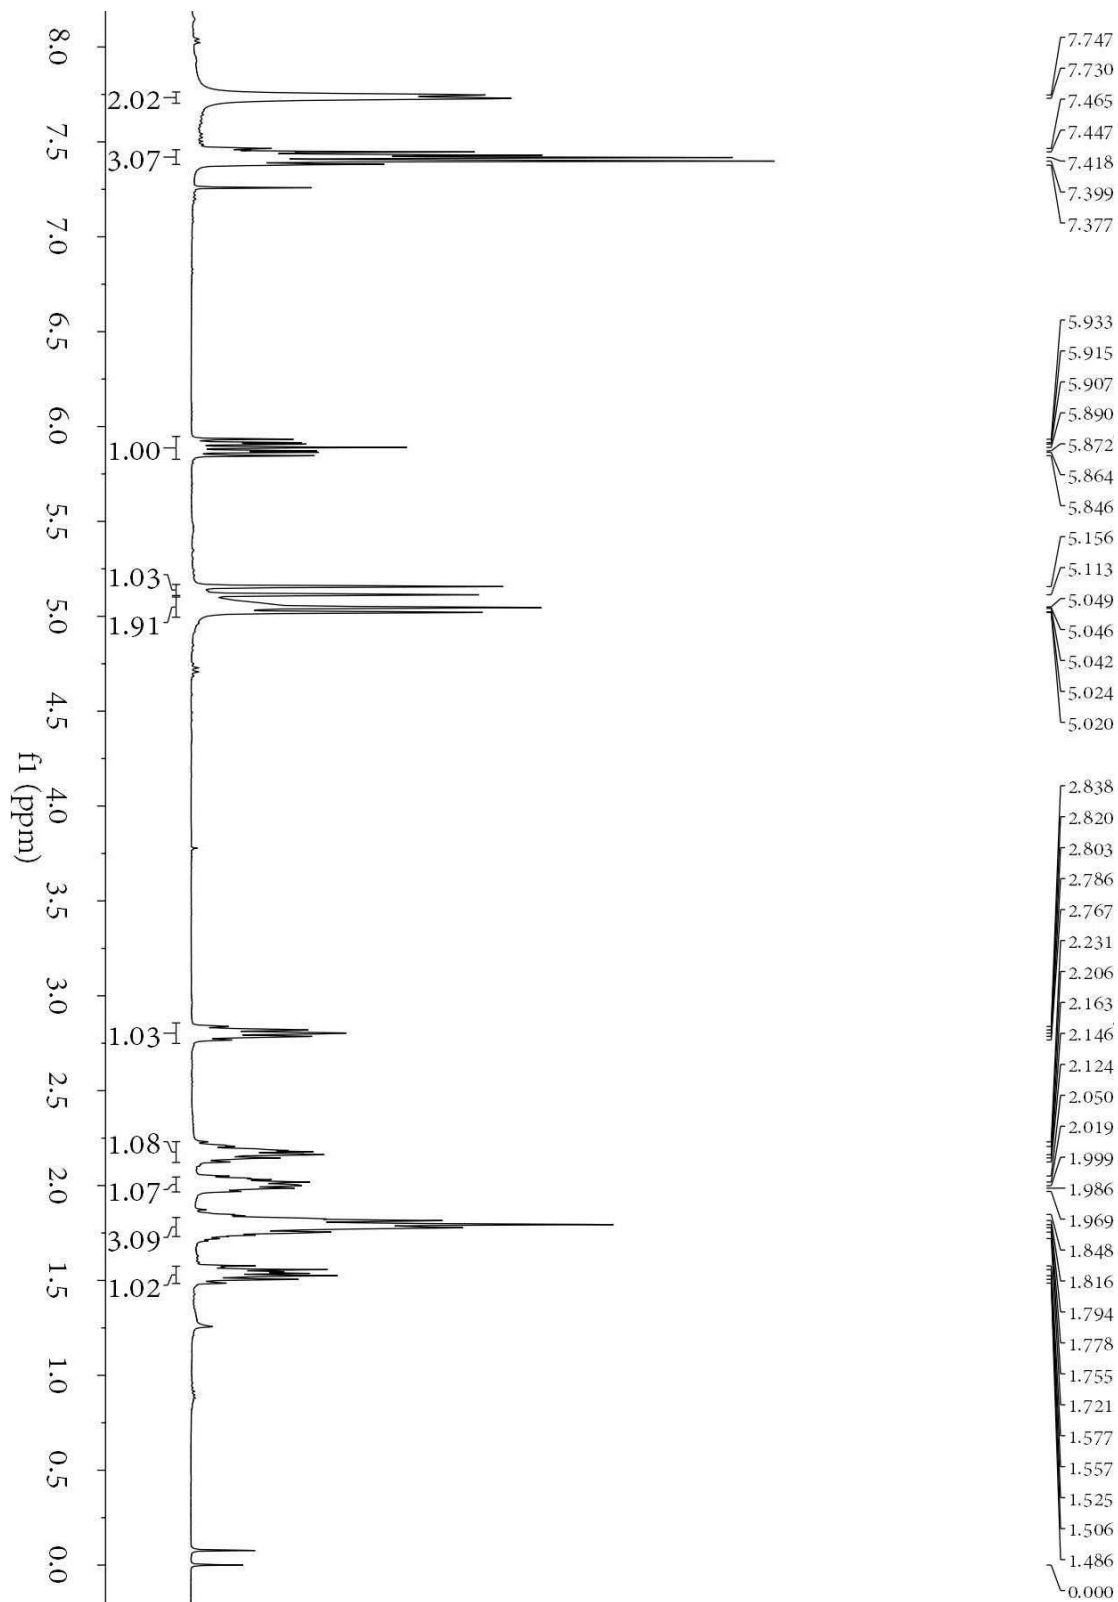

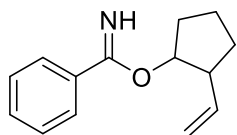

$^{13}\text{C}$  NMR of **1x**, 27%  
 $\text{CDCl}_3$ , 100 MHz

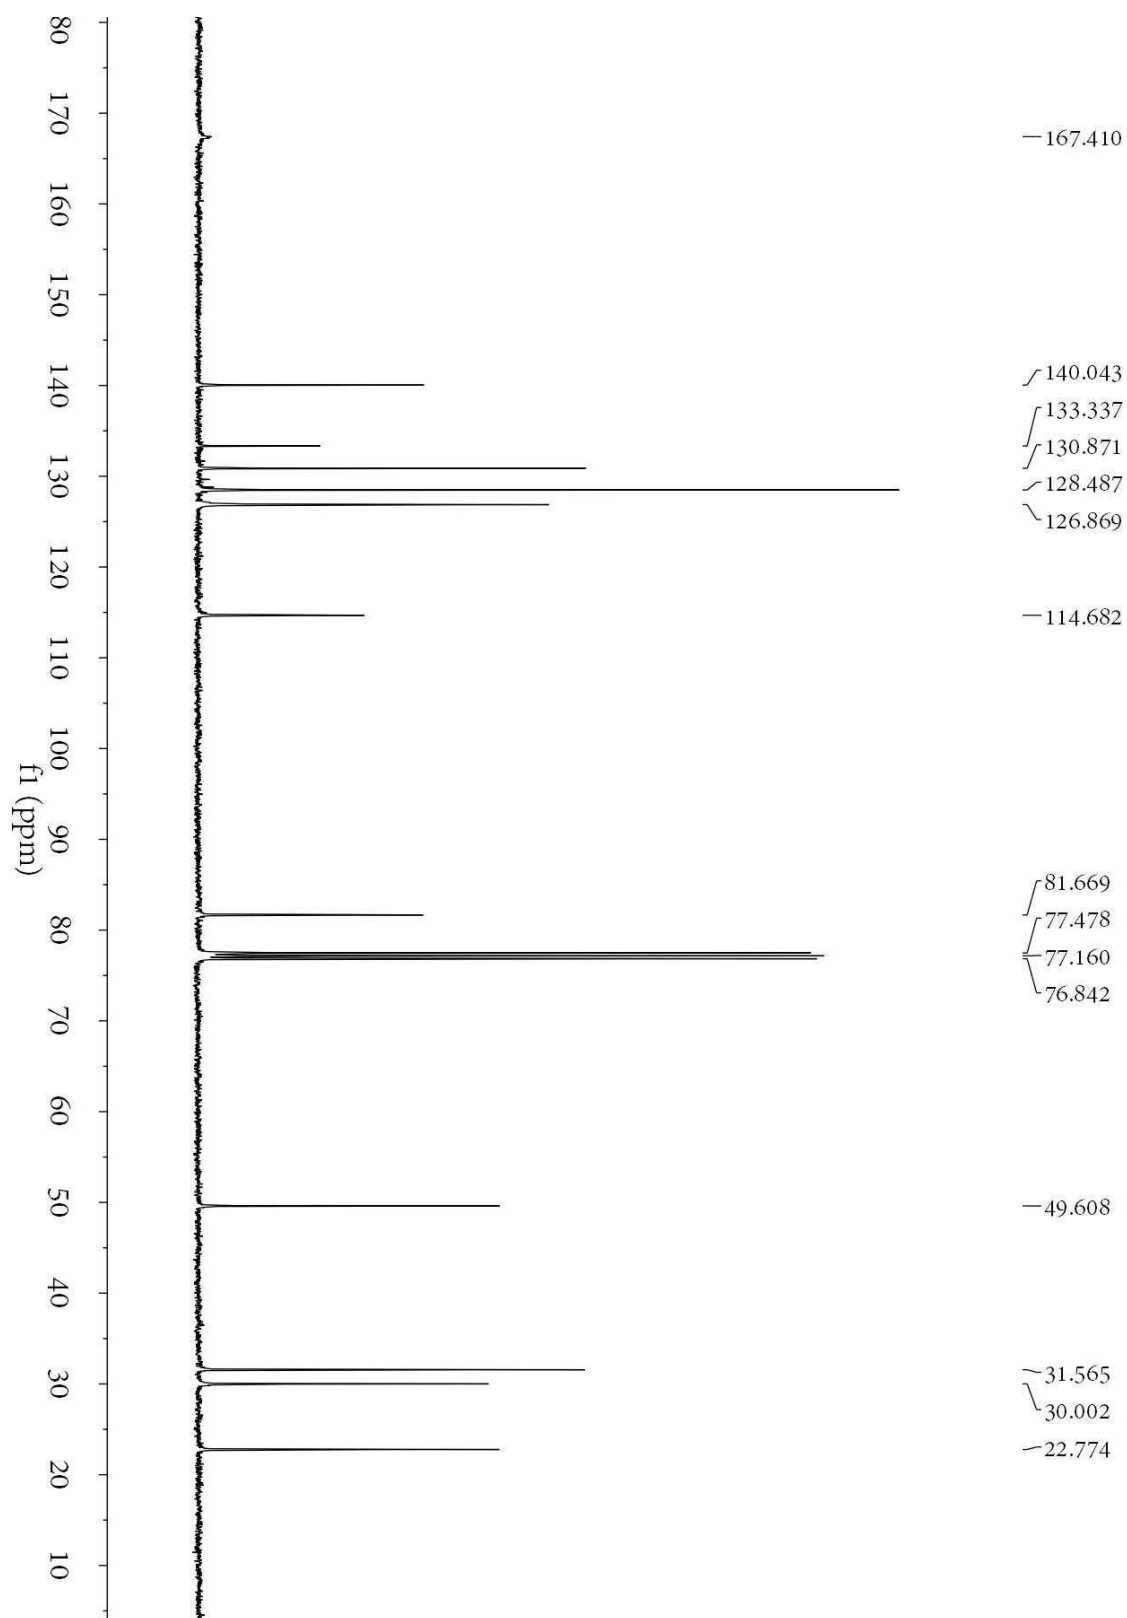

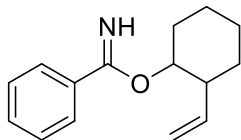

$^1\text{H}$  NMR of **1y**, 43%  
 $\text{CDCl}_3$ , 400 MHz

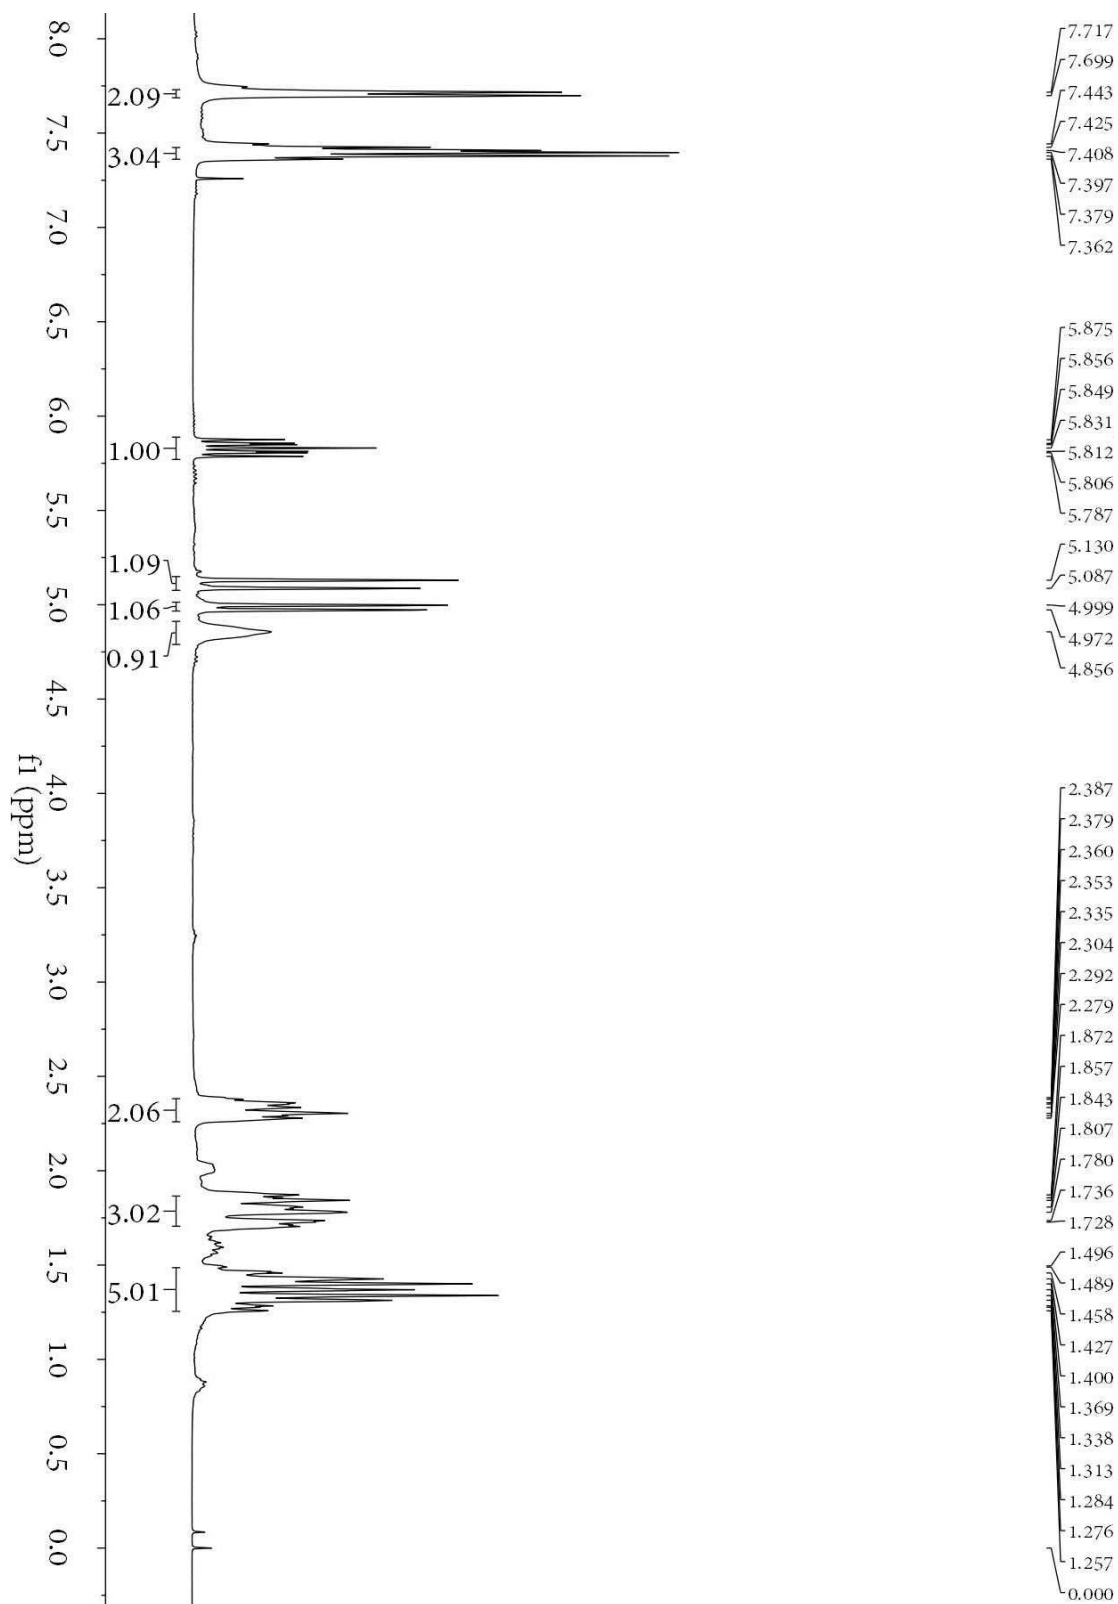

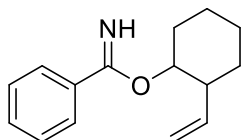

$^{13}\text{C}$  NMR of **1y**, 43%  
 $\text{CDCl}_3$ , 100 MHz

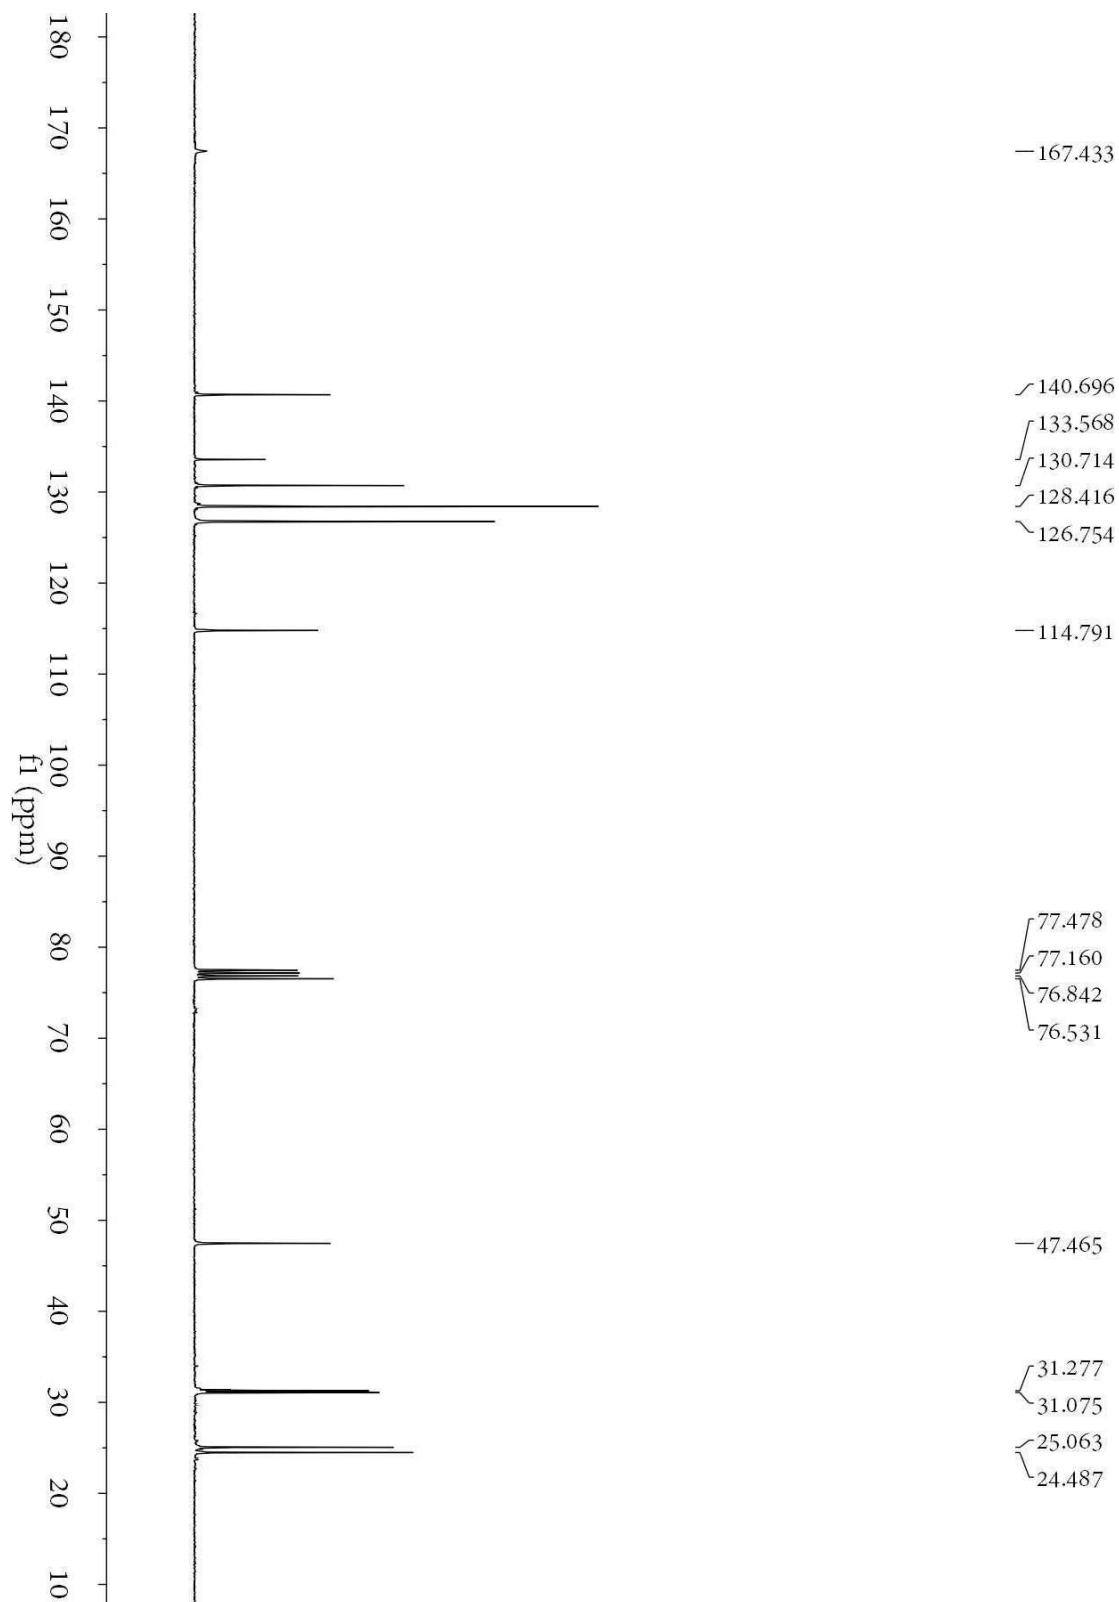



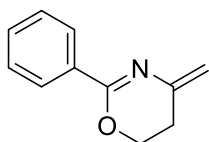

$^1\text{H}$  NMR of **2a**, 86%  
 $\text{CDCl}_3$ , 400 MHz

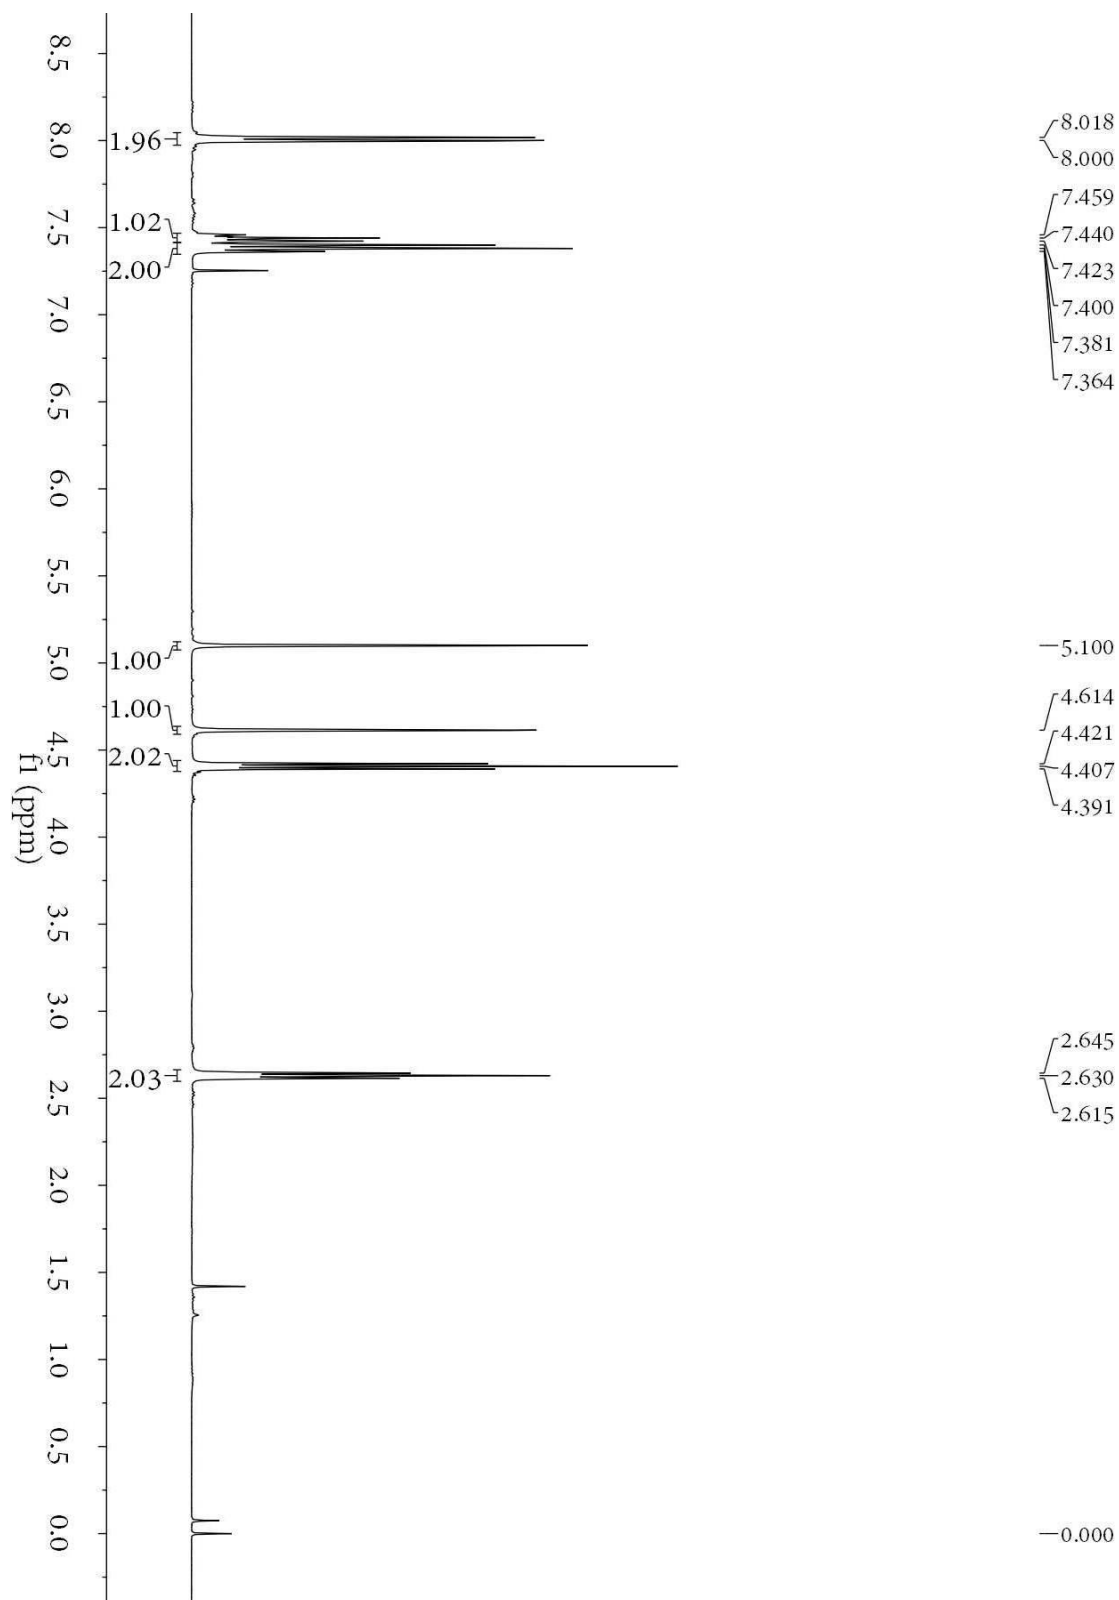

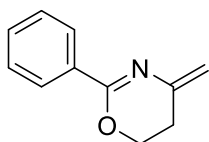

$^{13}\text{C}$  NMR of **2a**, 86%  
 $\text{CDCl}_3$ , 100 MHz

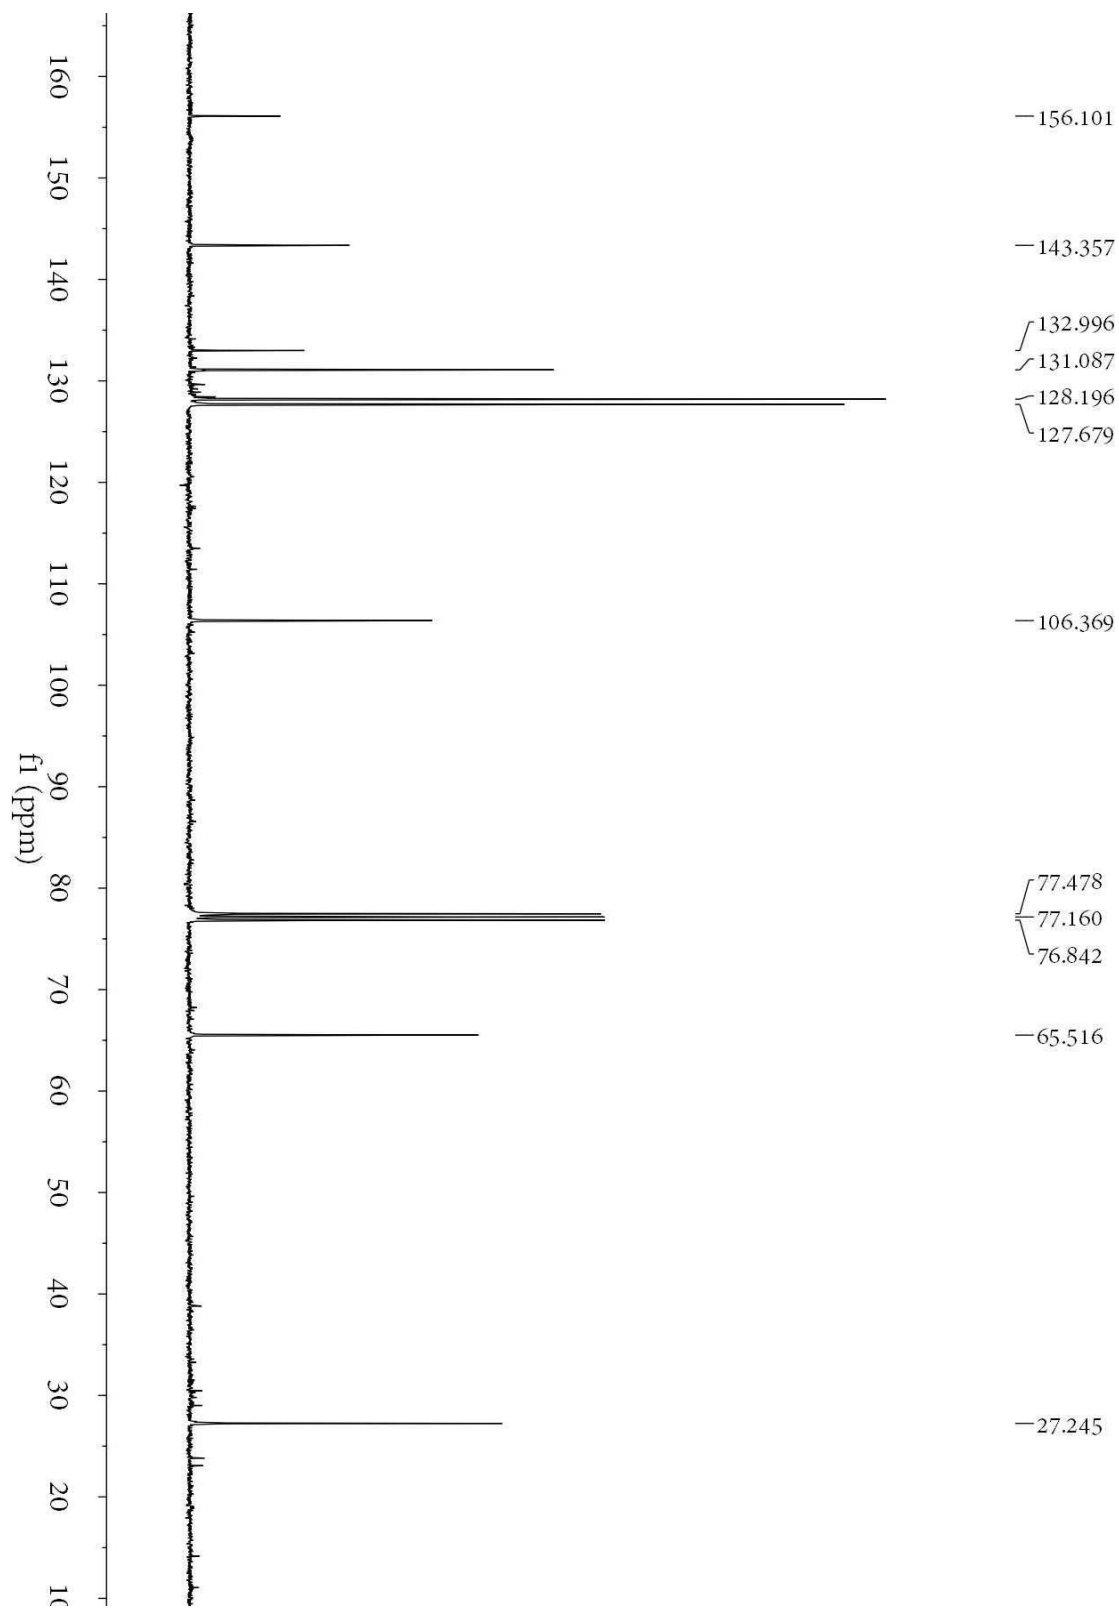

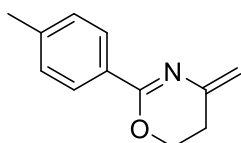

$^1\text{H}$  NMR of **2b**, 82%  
 $\text{CDCl}_3$ , 400 MHz

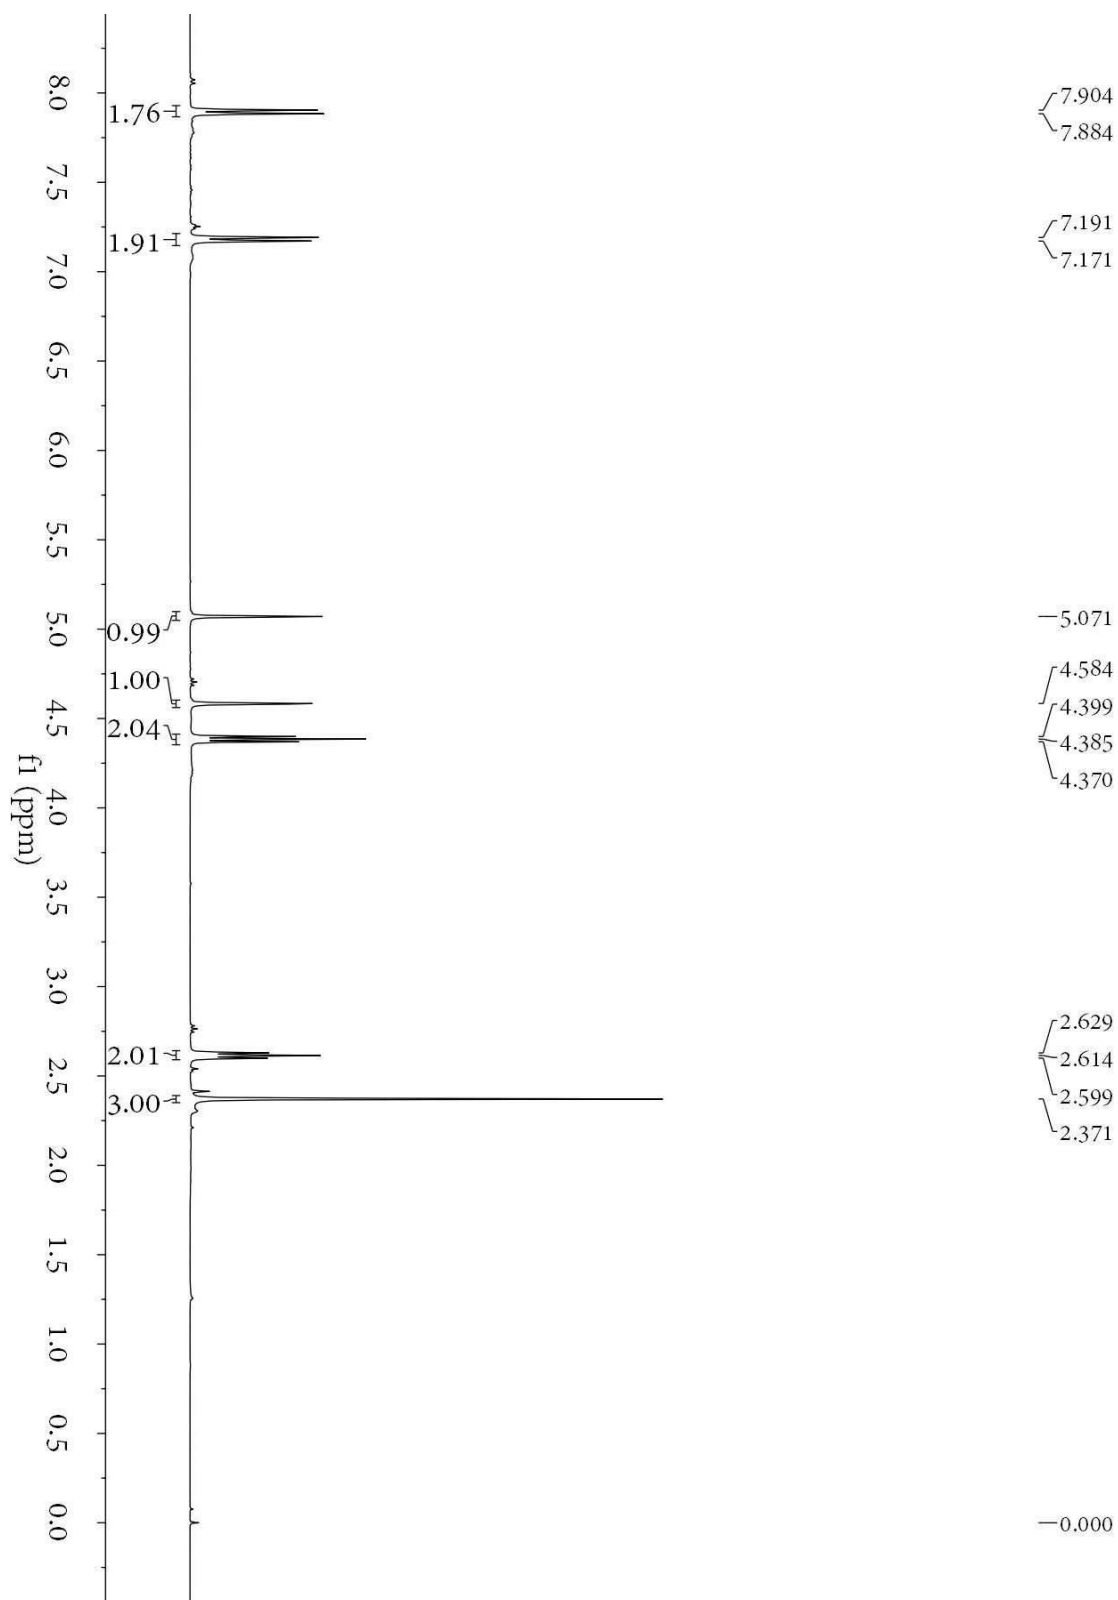

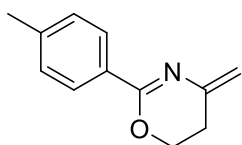

$^{13}\text{C}$  NMR of **2b**, 82%  
 $\text{CDCl}_3$ , 100 MHz

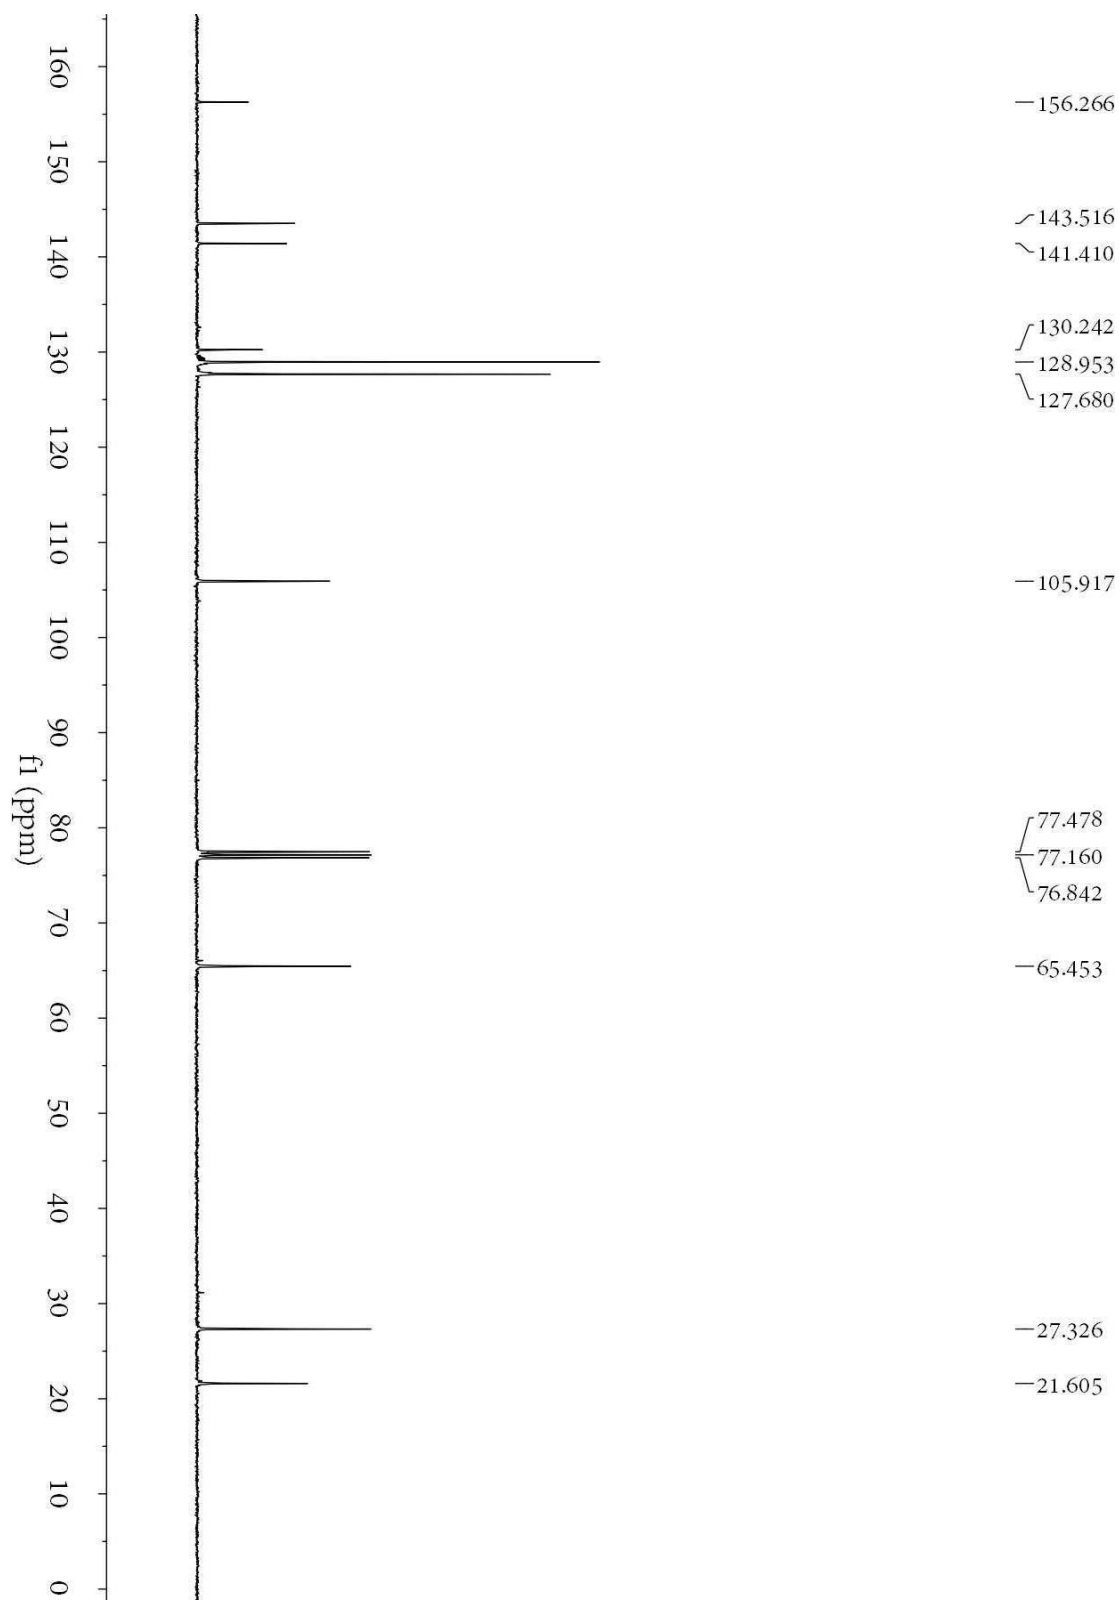

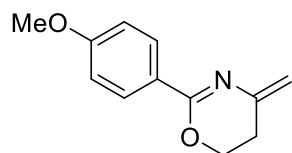

$^1\text{H}$  NMR of **2c**, 81%

$\text{CDCl}_3$ , 400 MHz

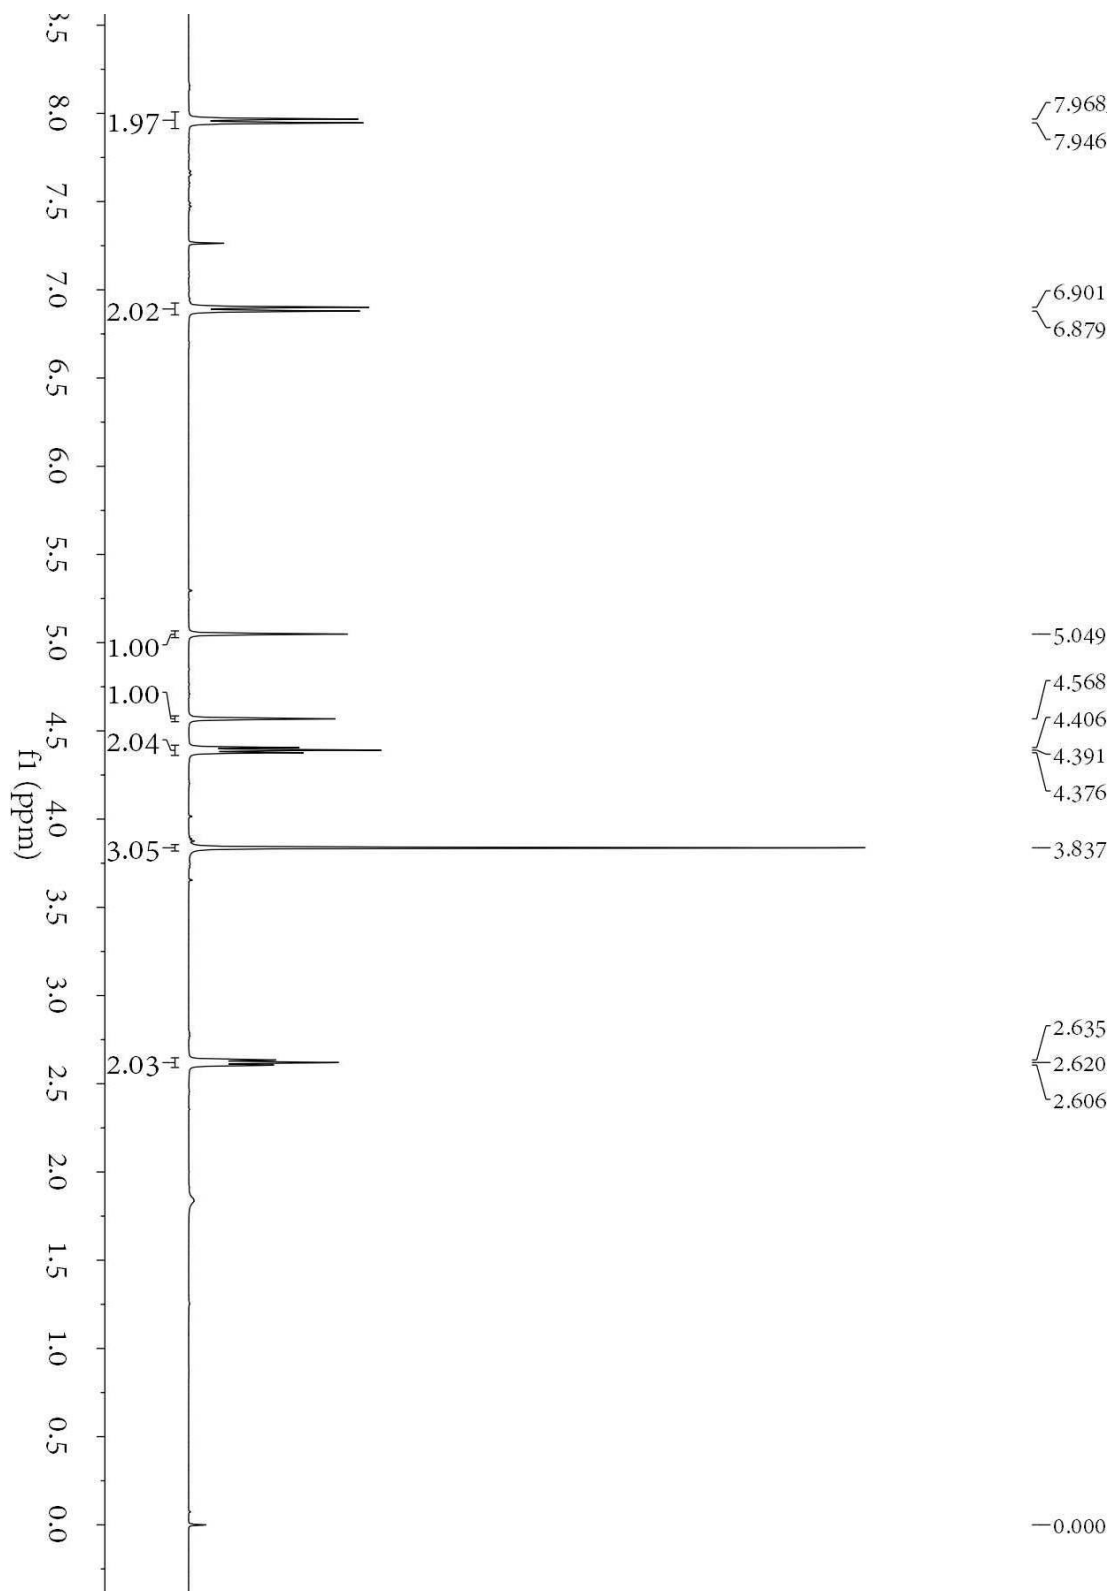

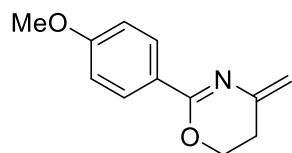

$^{13}\text{C}$  NMR of **2c**, 81%  
 $\text{CDCl}_3$ , 100 MHz

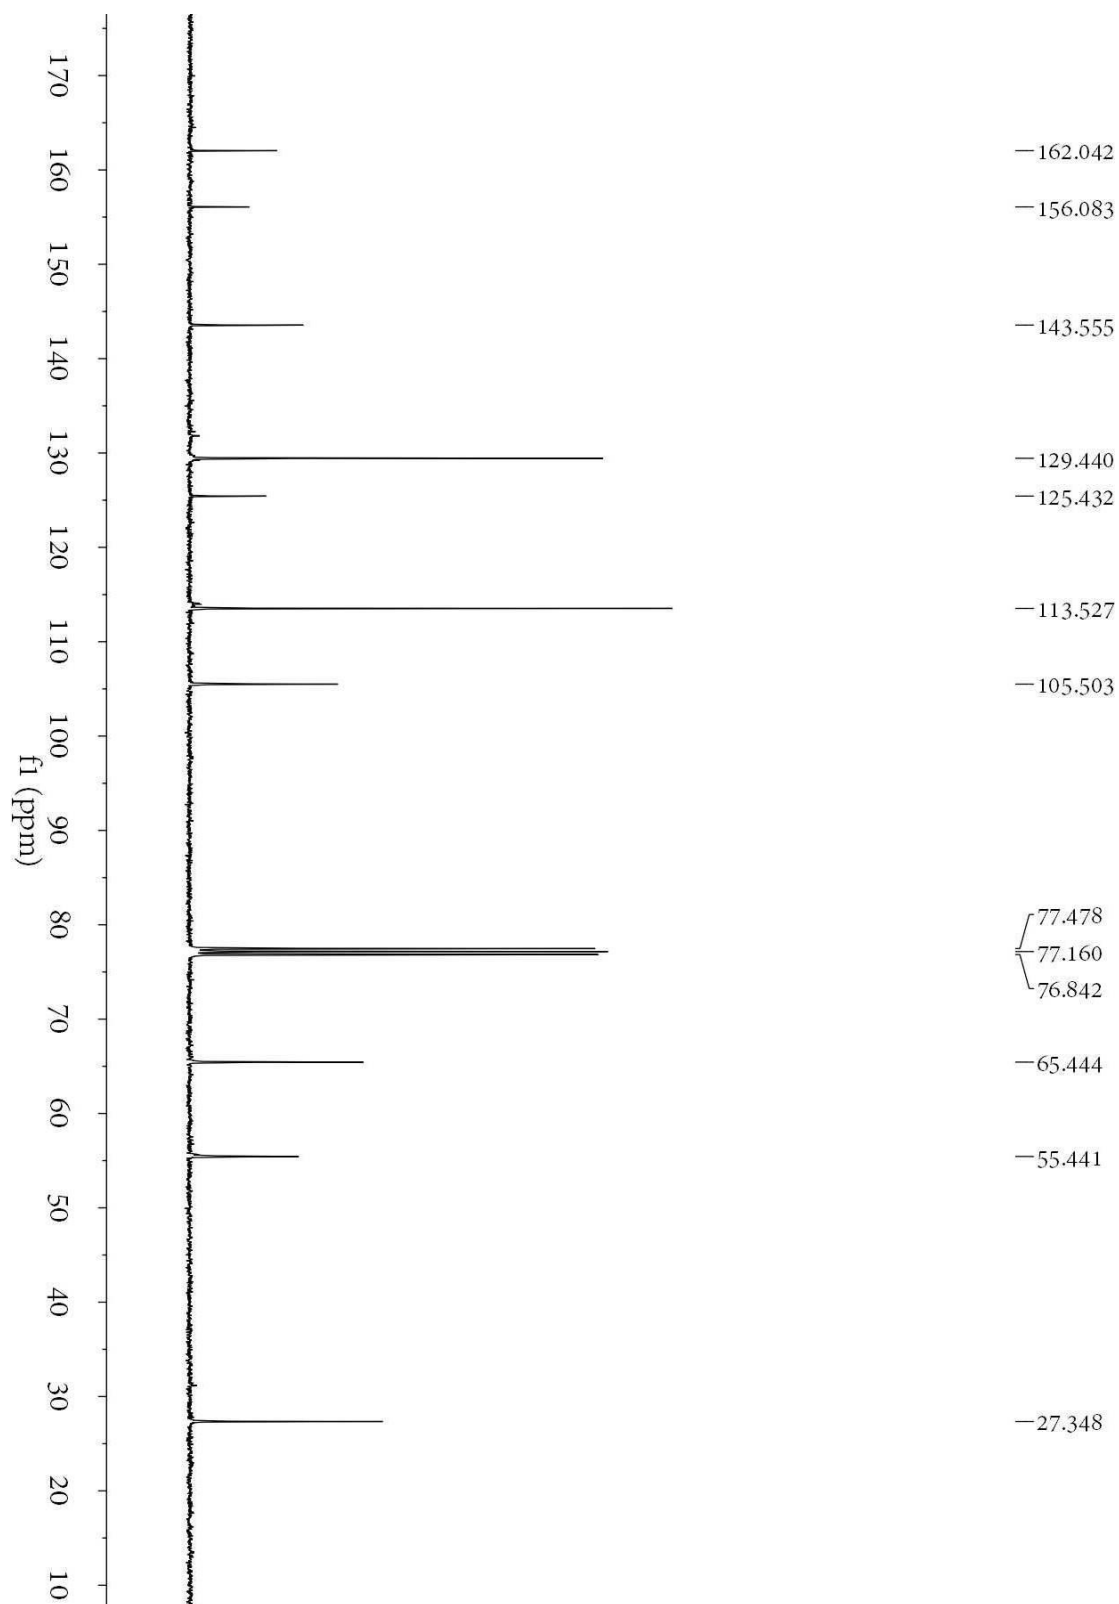

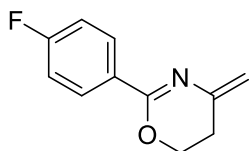

<sup>1</sup>H NMR of **2d**, 59%

CDCl<sub>3</sub>, 400 MHz

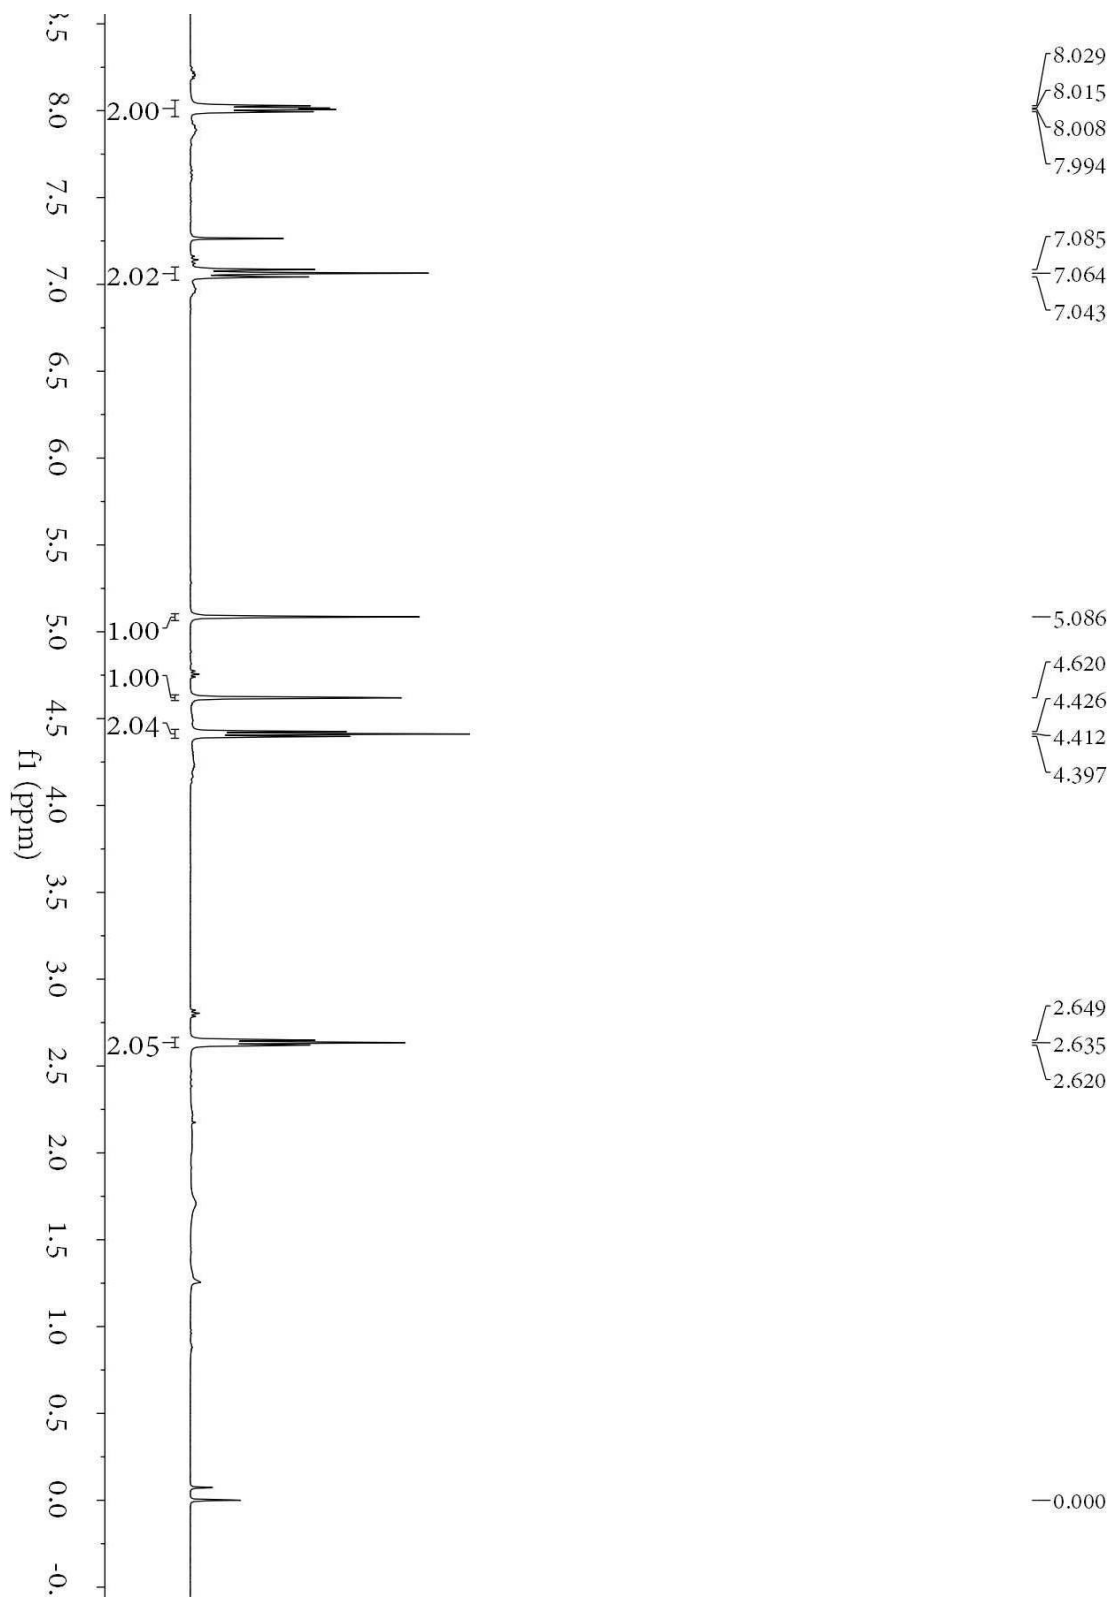

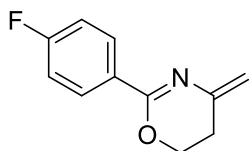

$^{13}\text{C}$  NMR of **2d**, 59%  
 $\text{CDCl}_3$ , 100 MHz

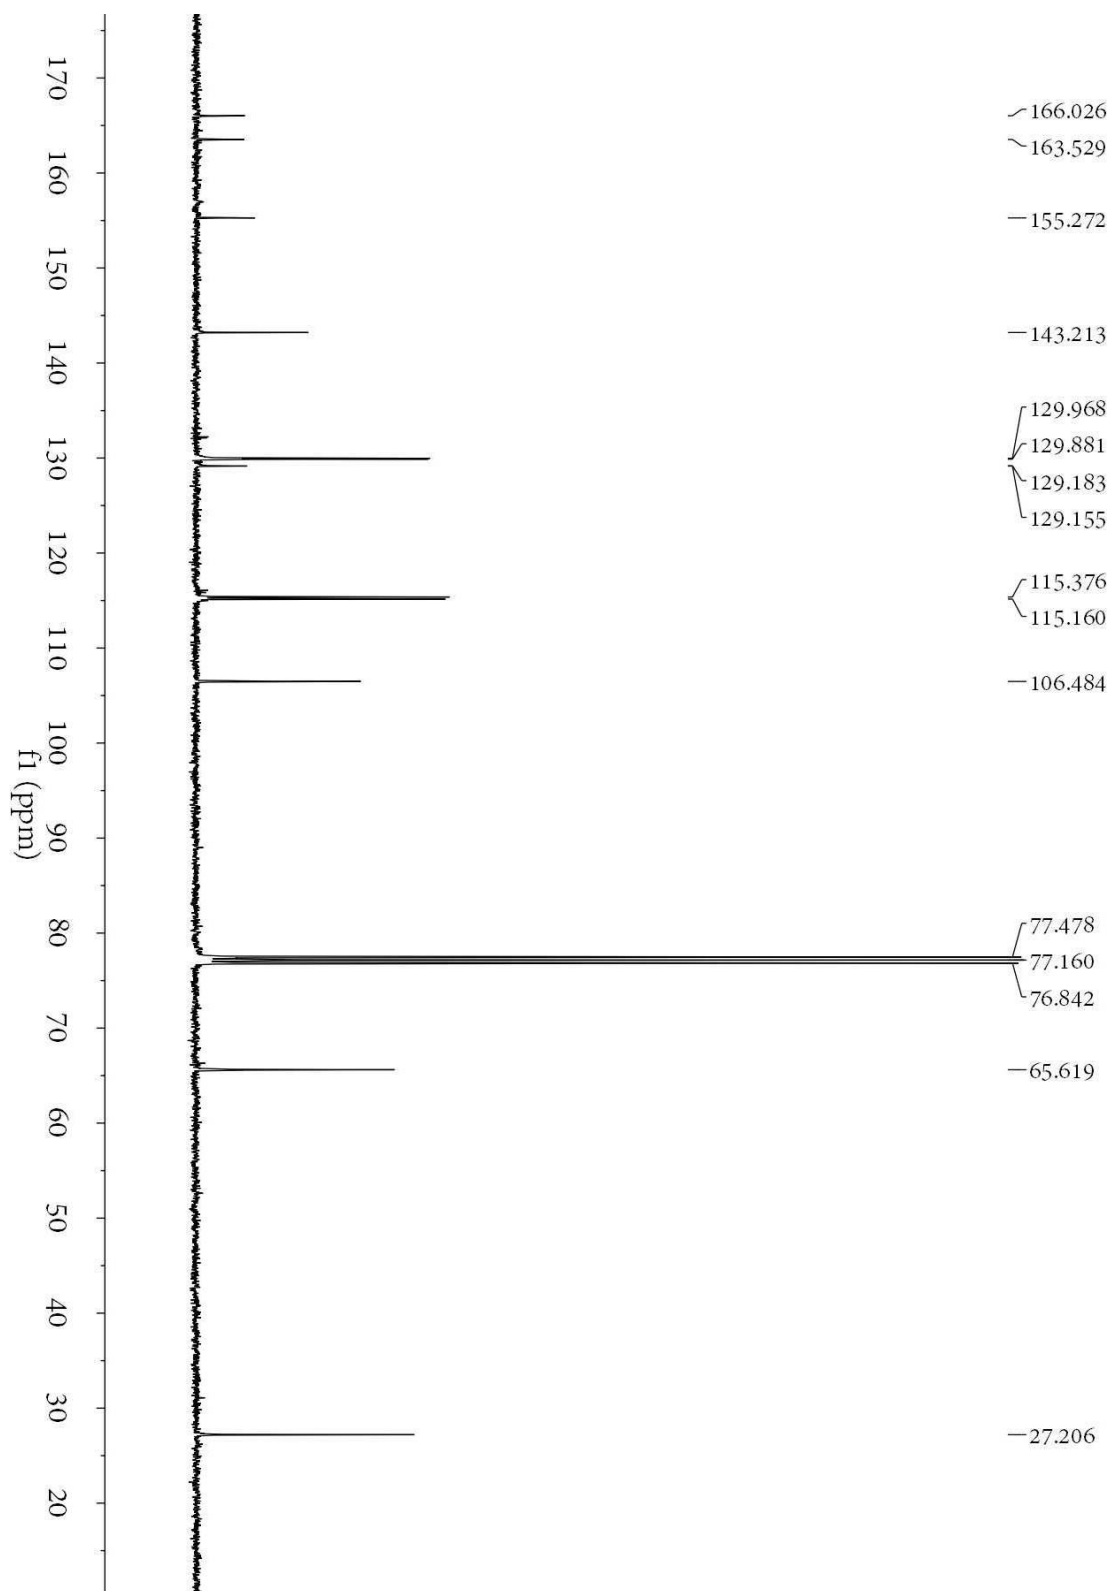



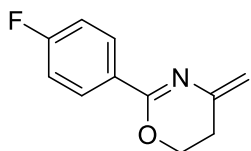

$^{19}\text{F}$  NMR of **2d**, 59%  
 $\text{CDCl}_3$ , 564 MHz

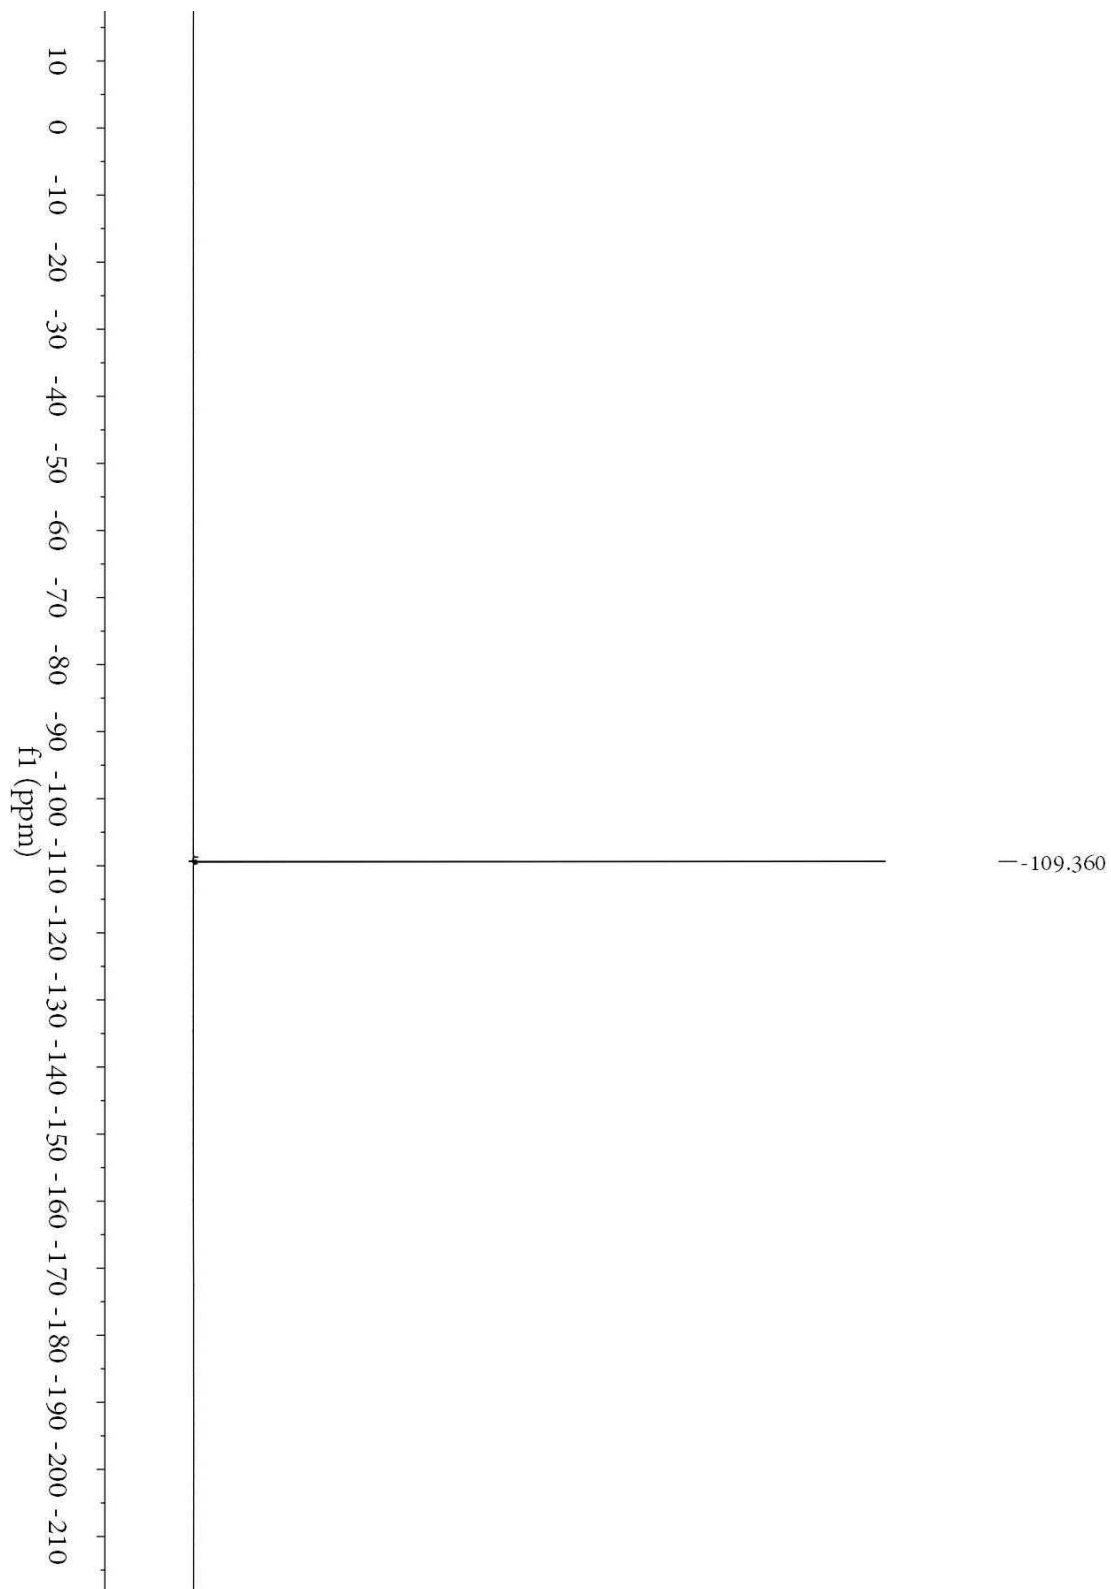

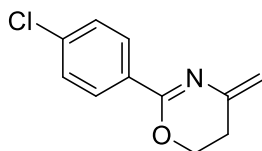

$^1\text{H}$  NMR of **2e**, 75%  
 $\text{CDCl}_3$ , 400 MHz

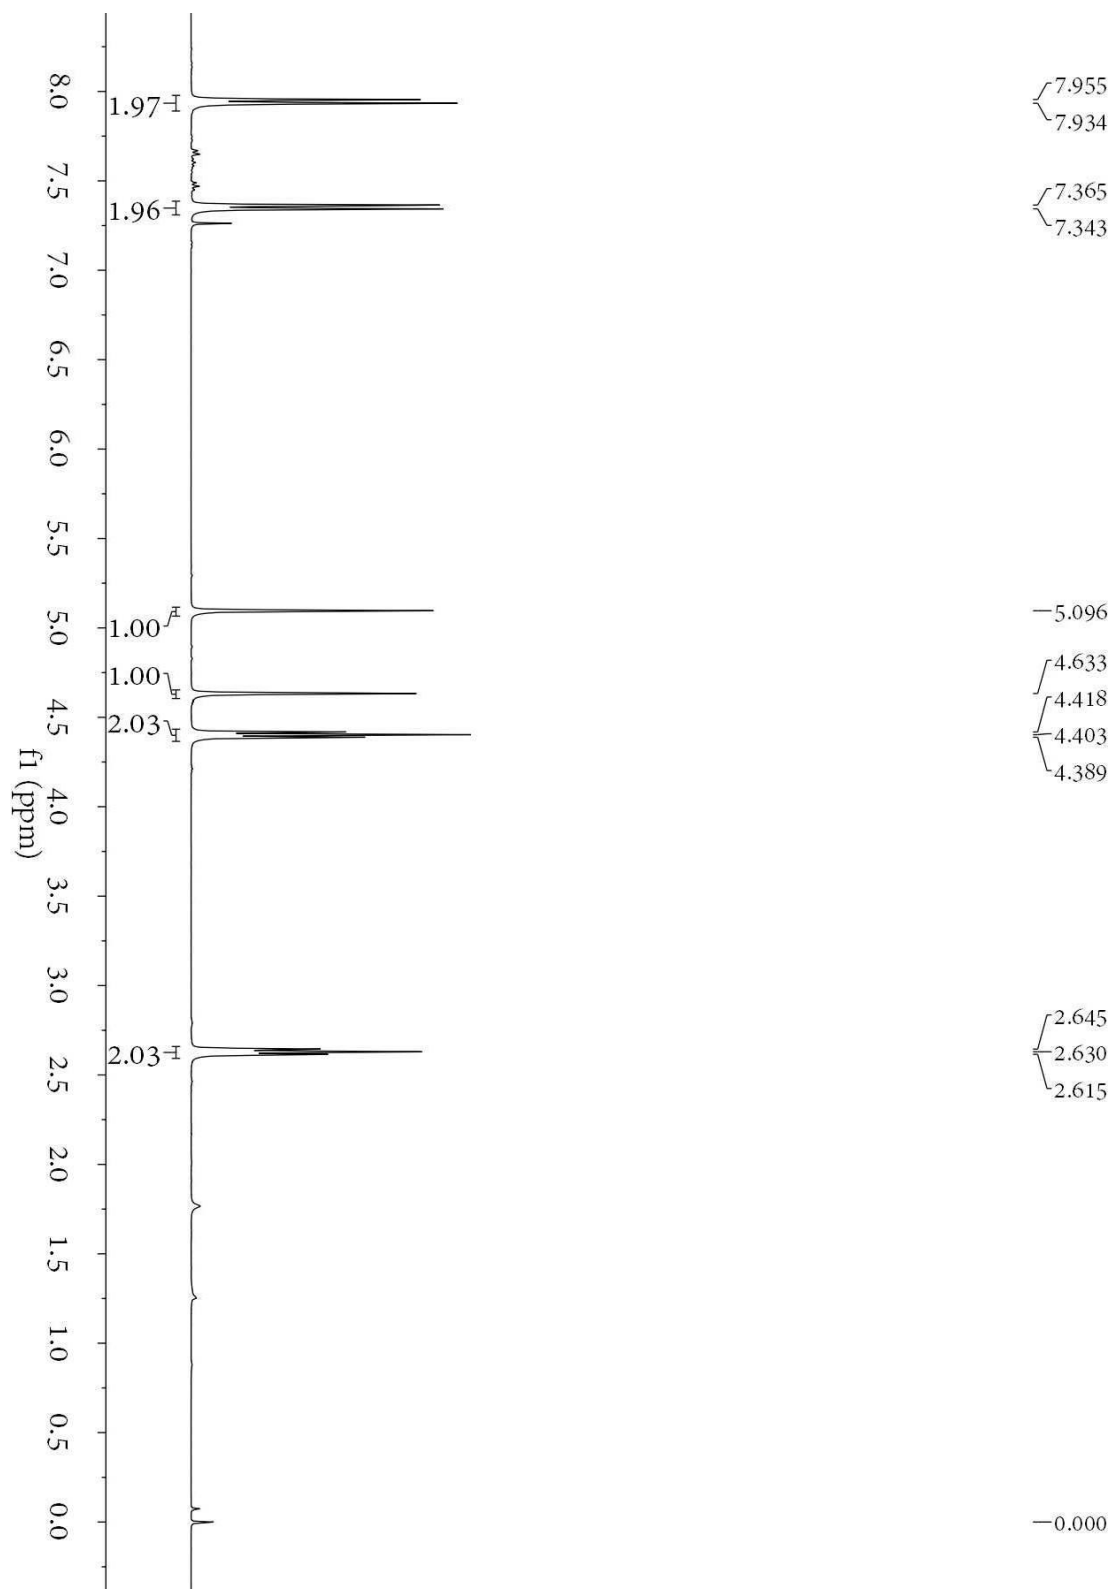

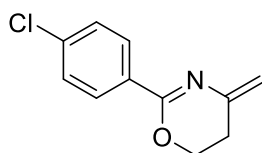

$^{13}\text{C}$  NMR of **2e**, 75%

$\text{CDCl}_3$ , 100 MHz

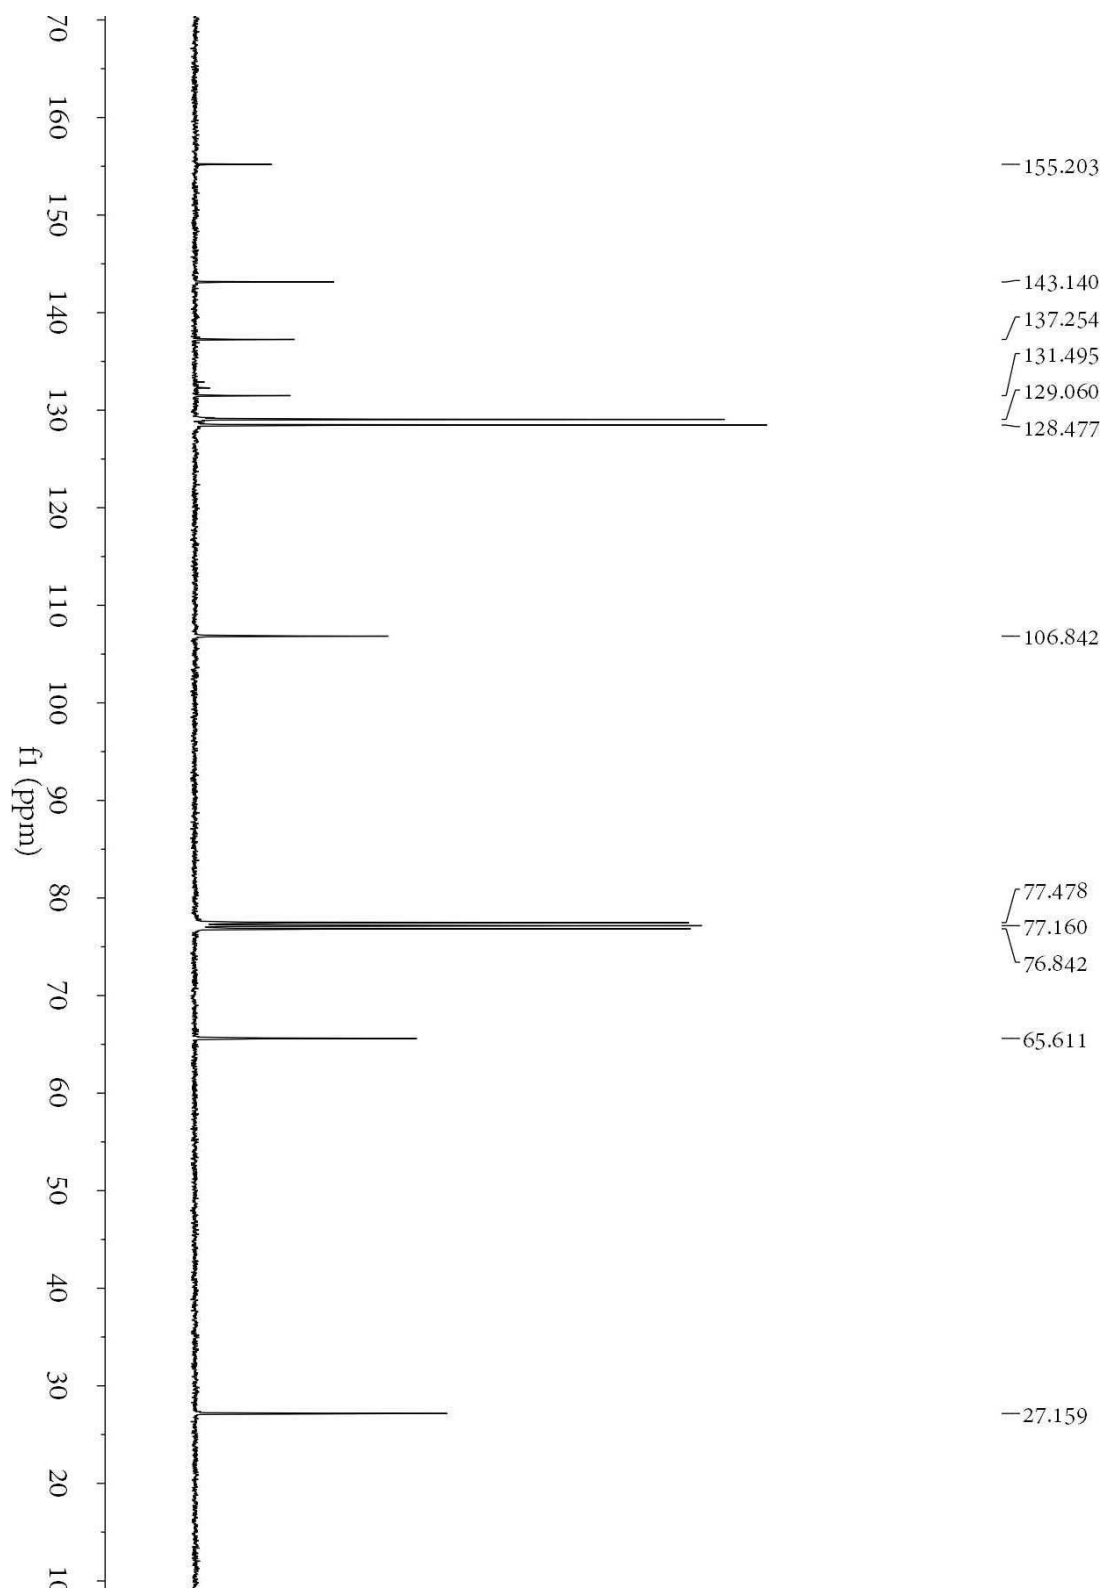

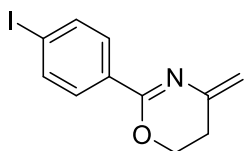

$^1\text{H}$  NMR of **2f**, 30%  
 $\text{CDCl}_3$ , 400 MHz

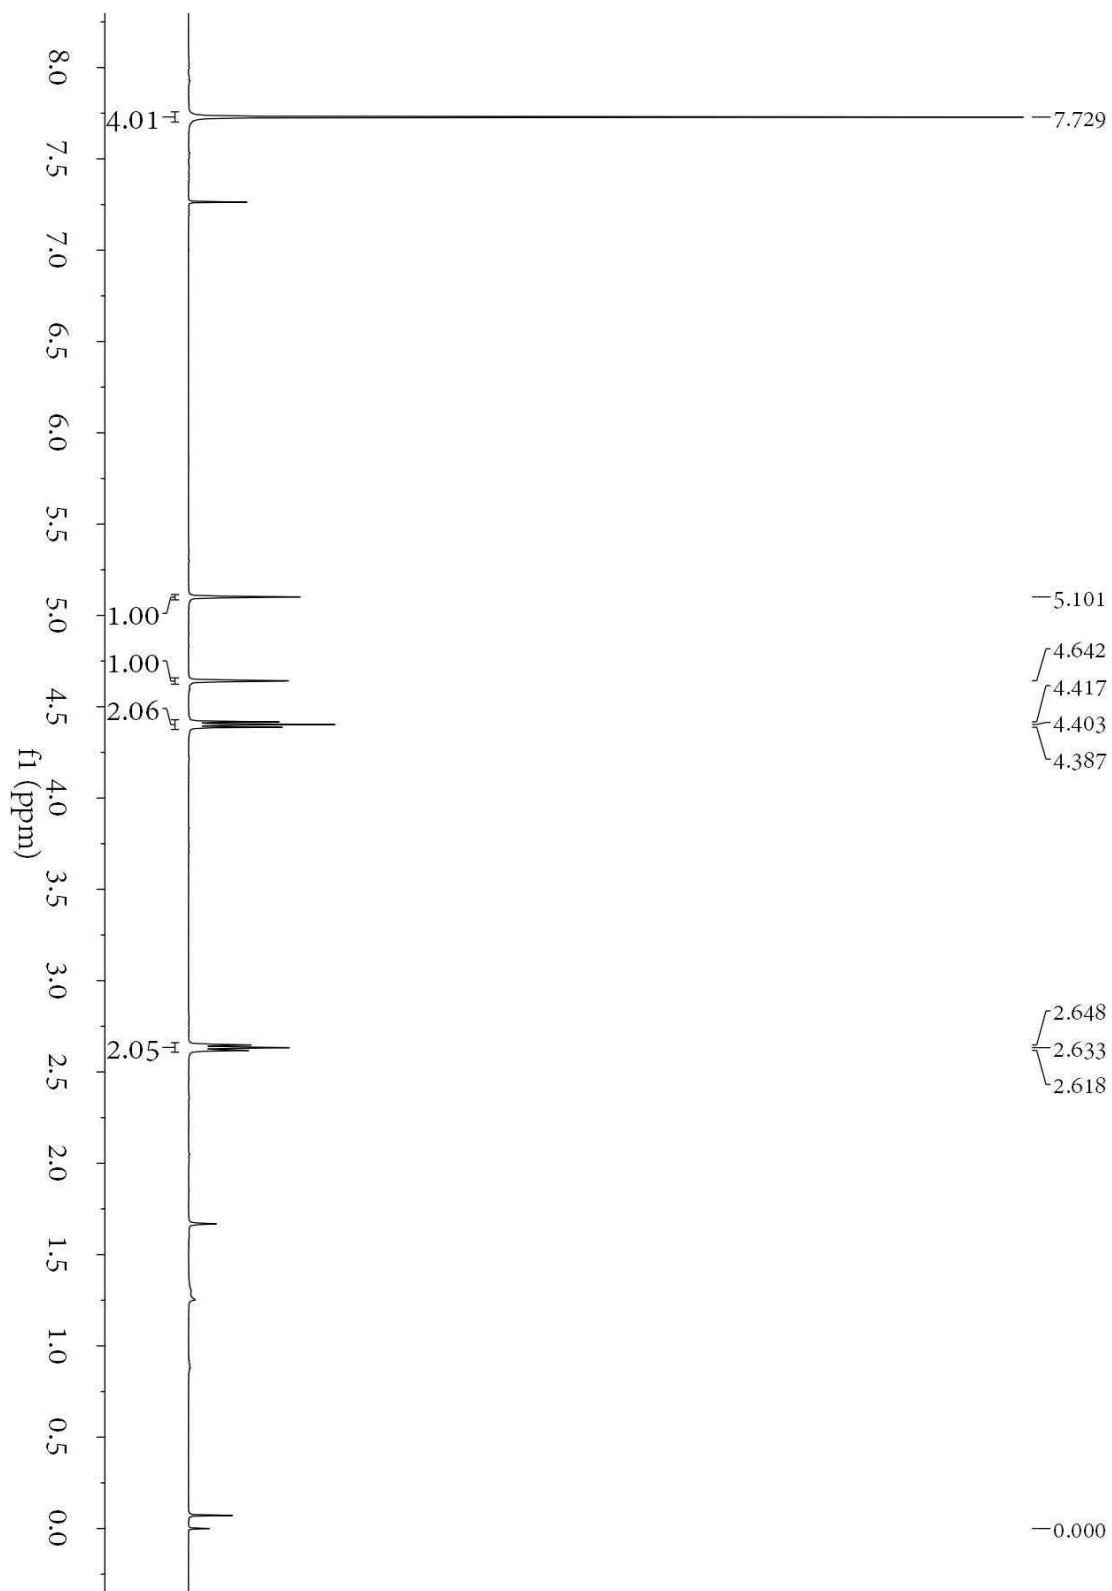

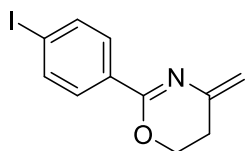

$^{13}\text{C}$  NMR of **2f**, 30%  
 $\text{CDCl}_3$ , 100 MHz

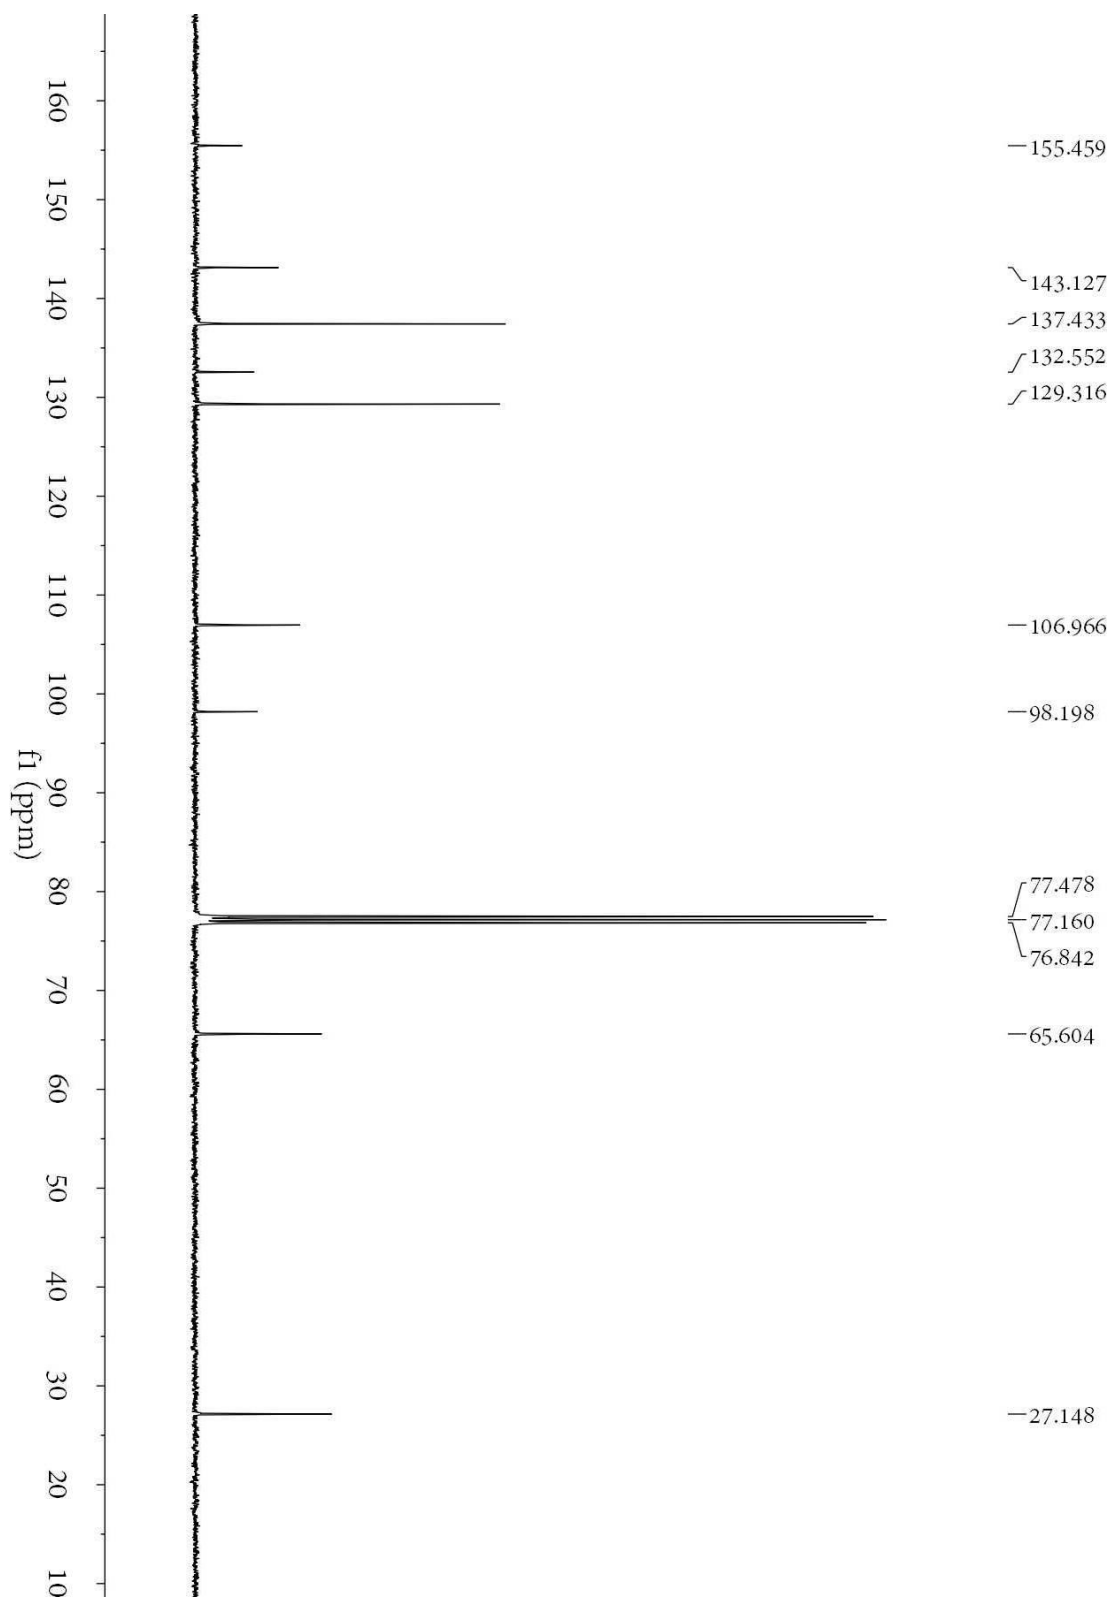

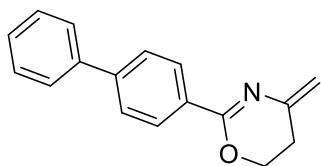

$^1\text{H}$  NMR of **2g**, 72%

$\text{CDCl}_3$ , 400 MHz

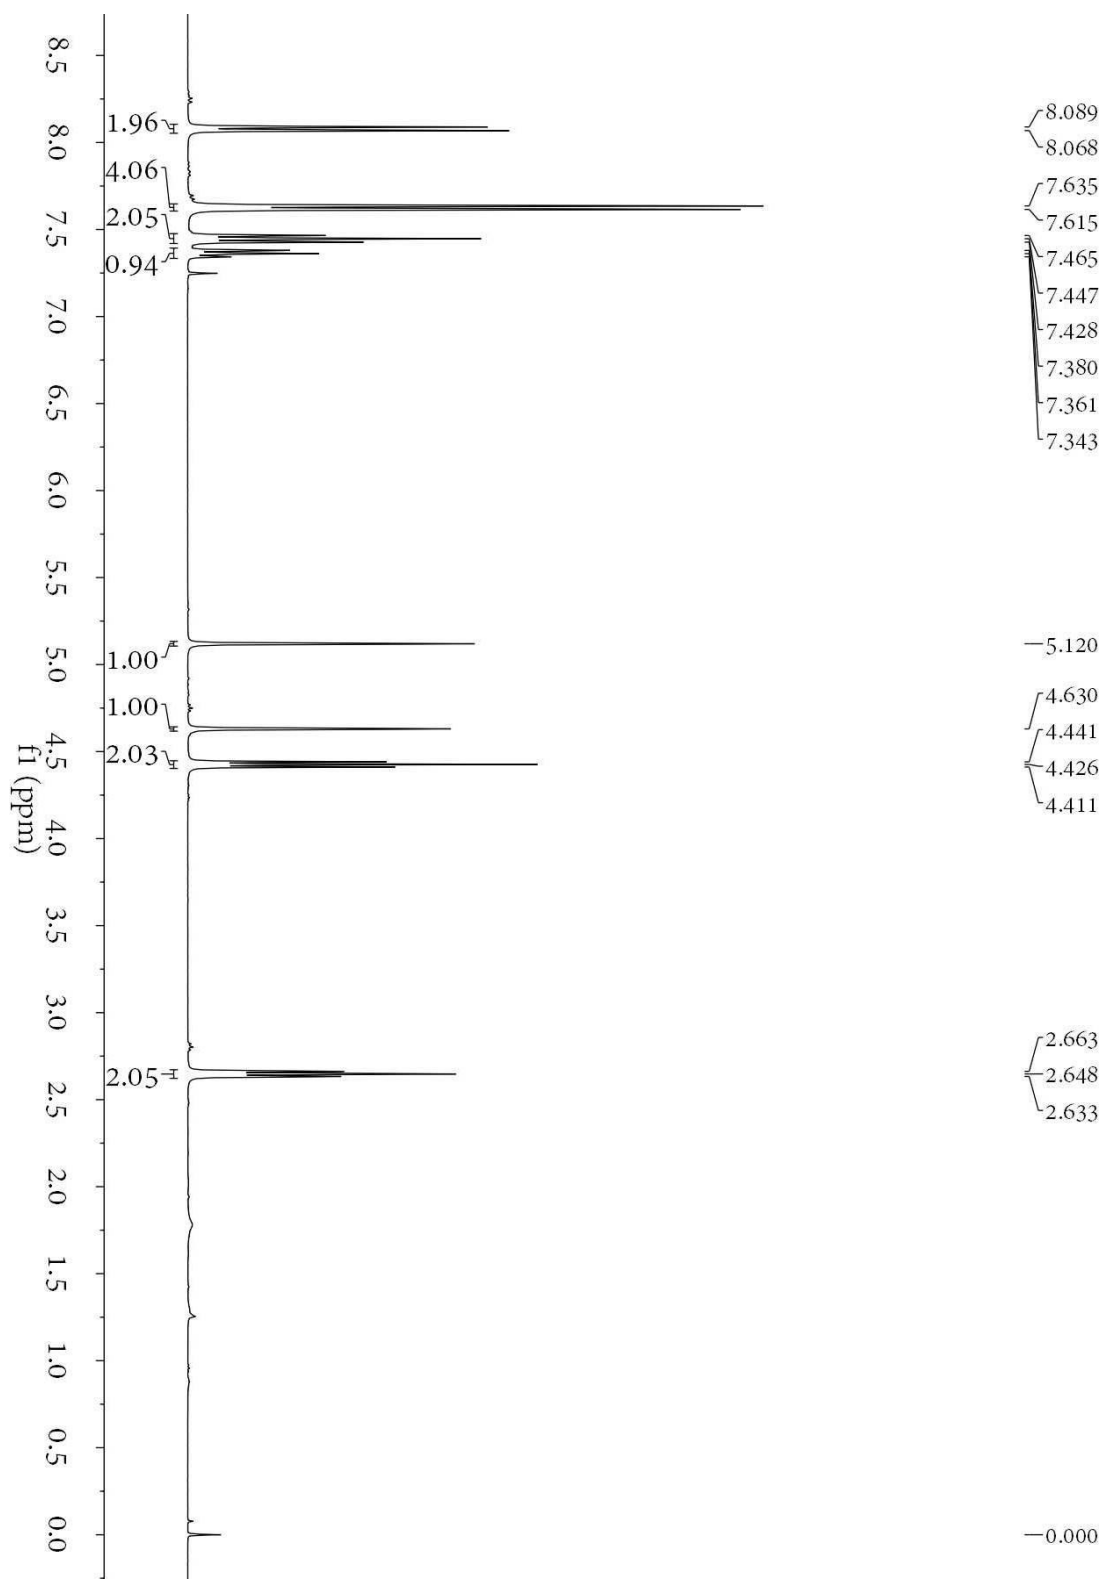

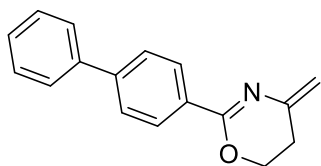

$^{13}\text{C}$  NMR of **2g**, 72%

$\text{CDCl}_3$ , 100 MHz

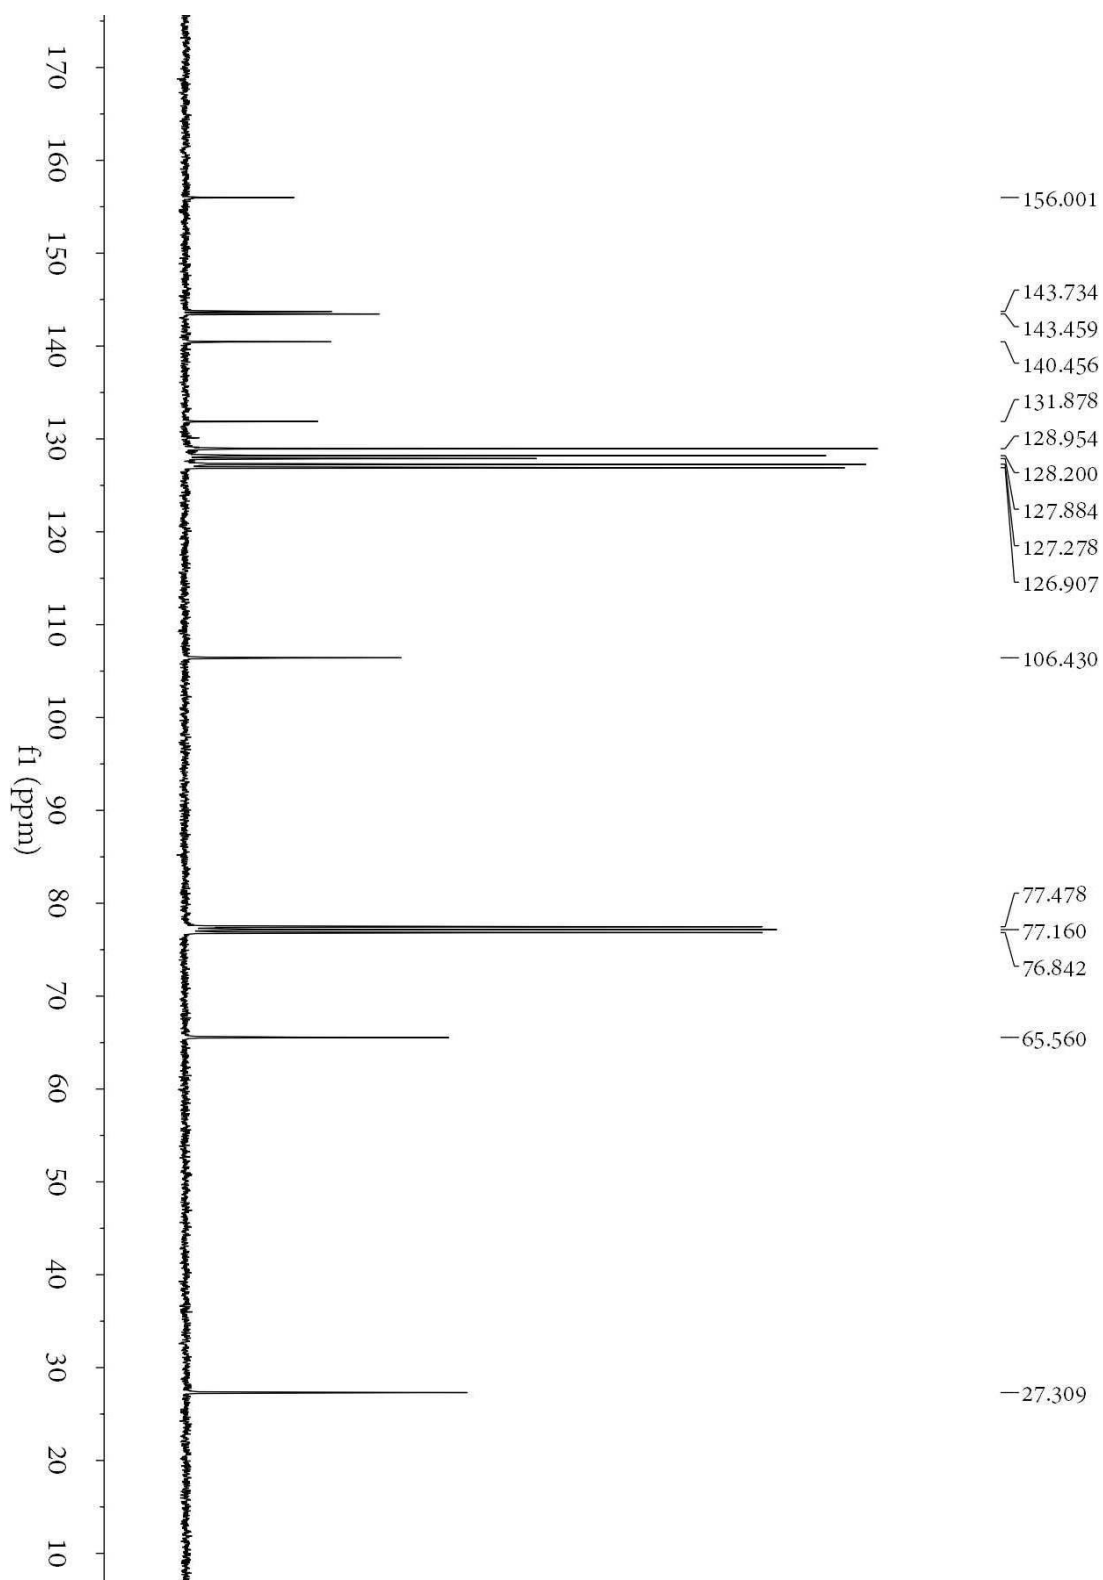

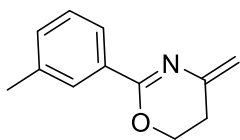

$^1\text{H}$  NMR of **2h**, 93%  
 $\text{CDCl}_3$ , 400 MHz

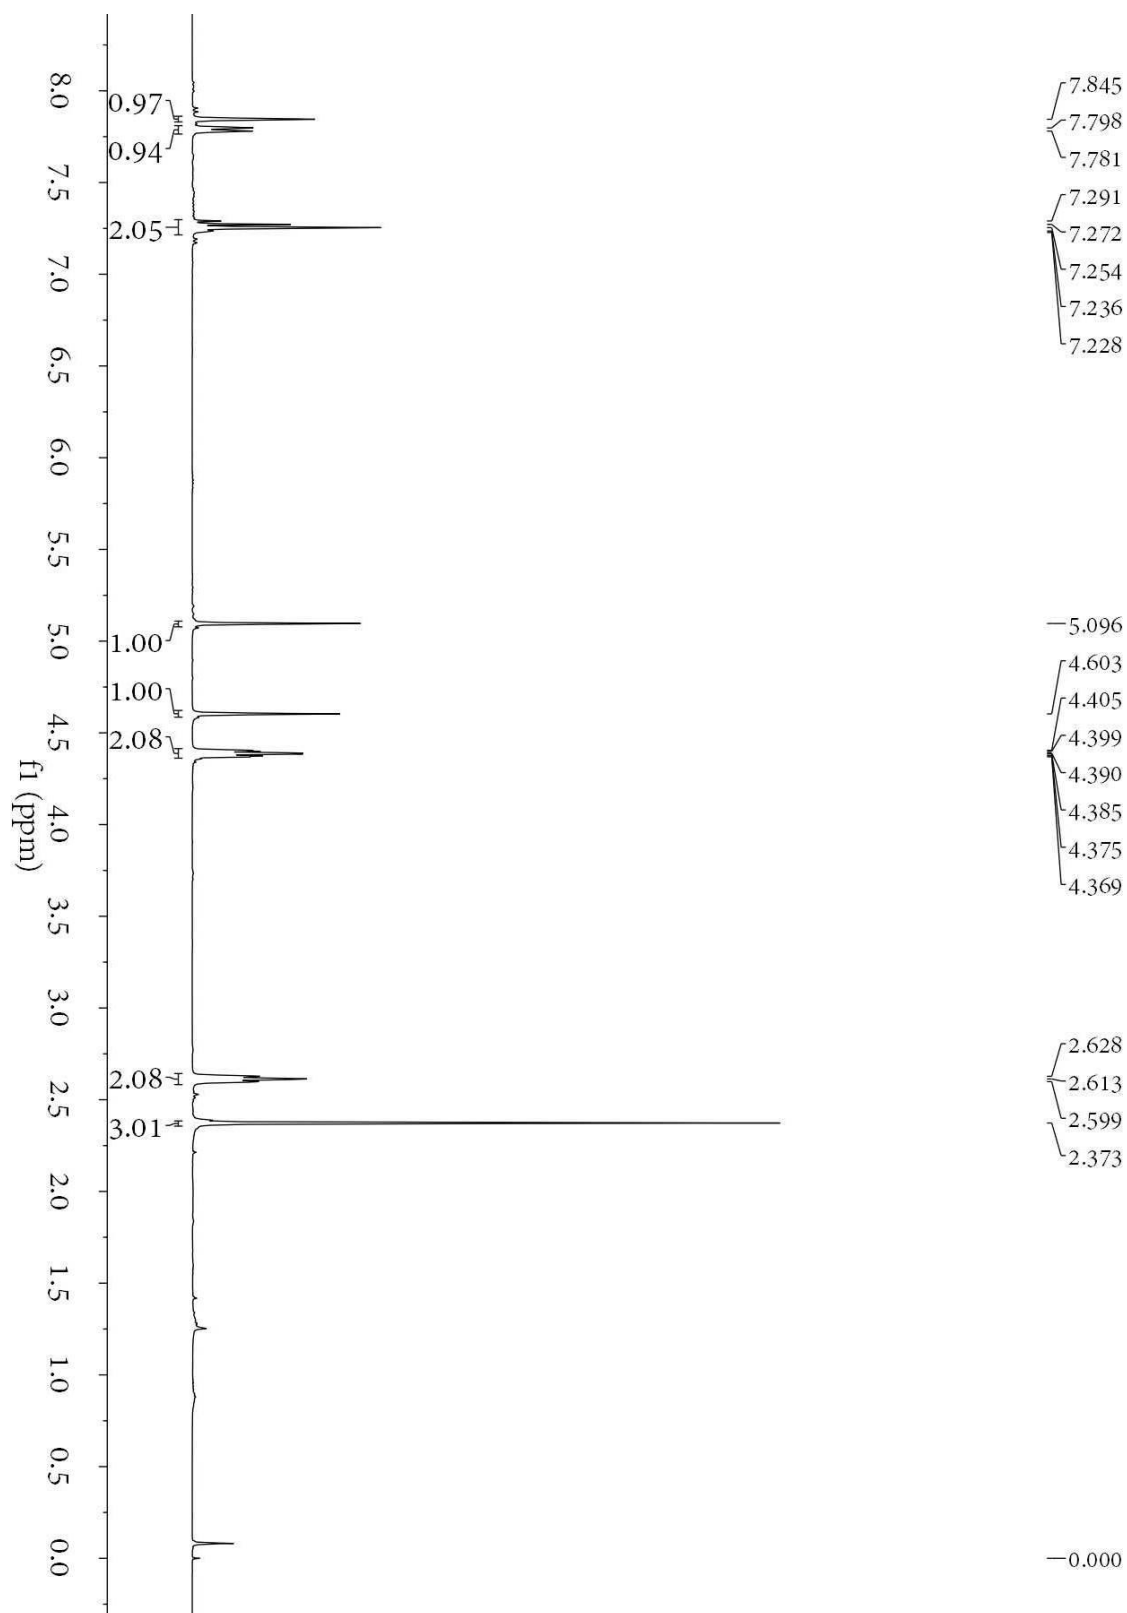



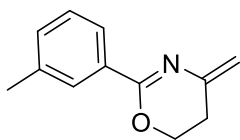

$^{13}\text{C}$  NMR of **2h**, 93%  
 $\text{CDCl}_3$ , 100 MHz

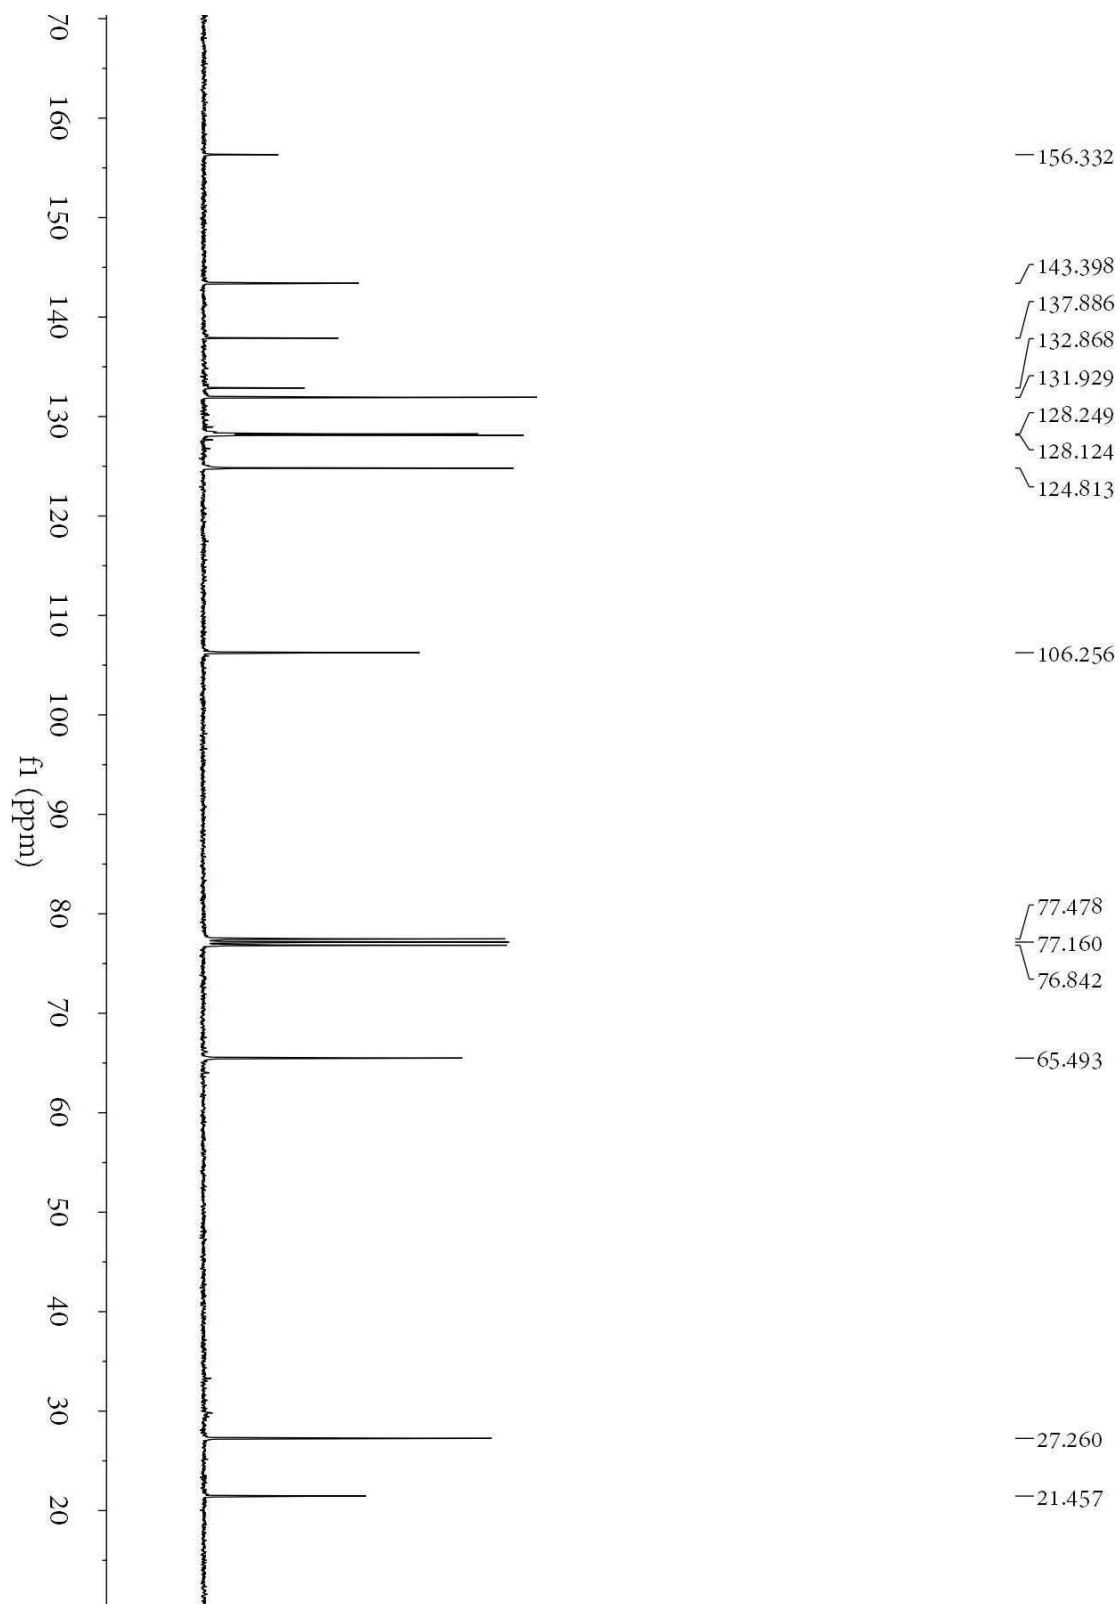

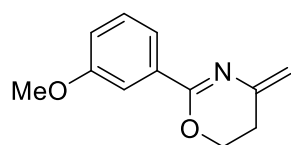

<sup>1</sup>H NMR of **2i**, 71%  
CDCl<sub>3</sub>, 400 MHz

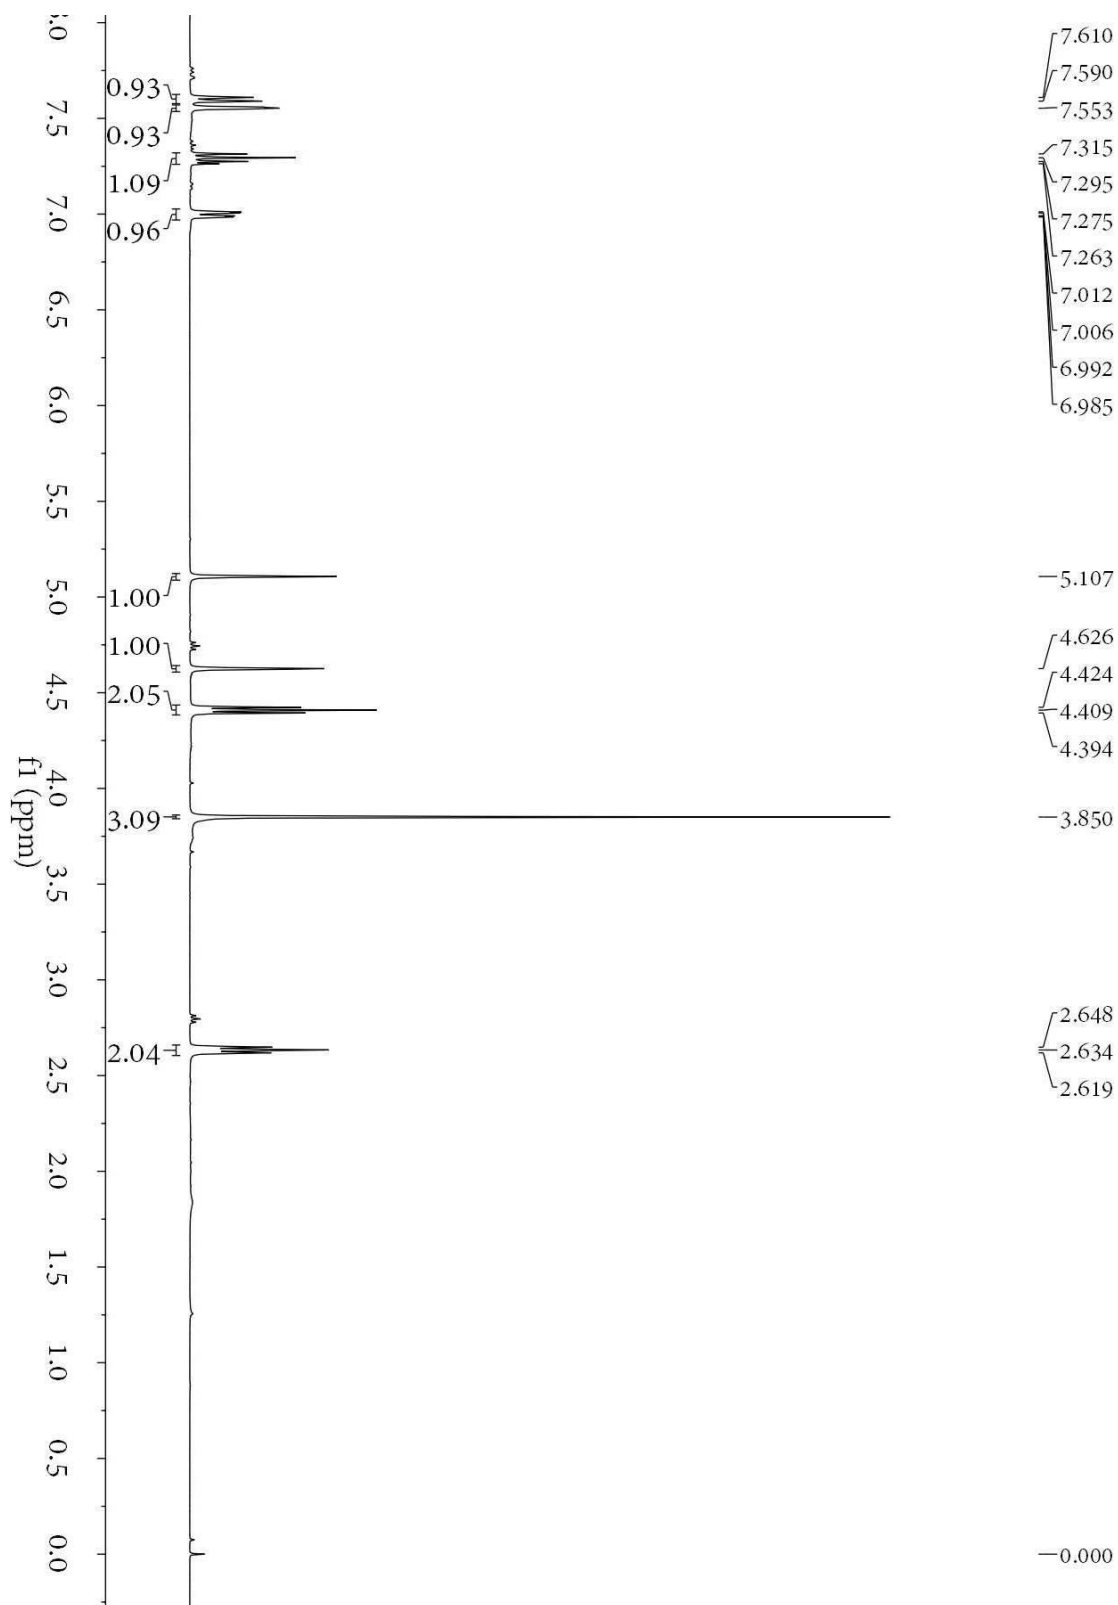

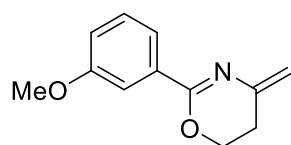

$^{13}\text{C}$  NMR of **2i**, 71%  
 $\text{CDCl}_3$ , 100 MHz

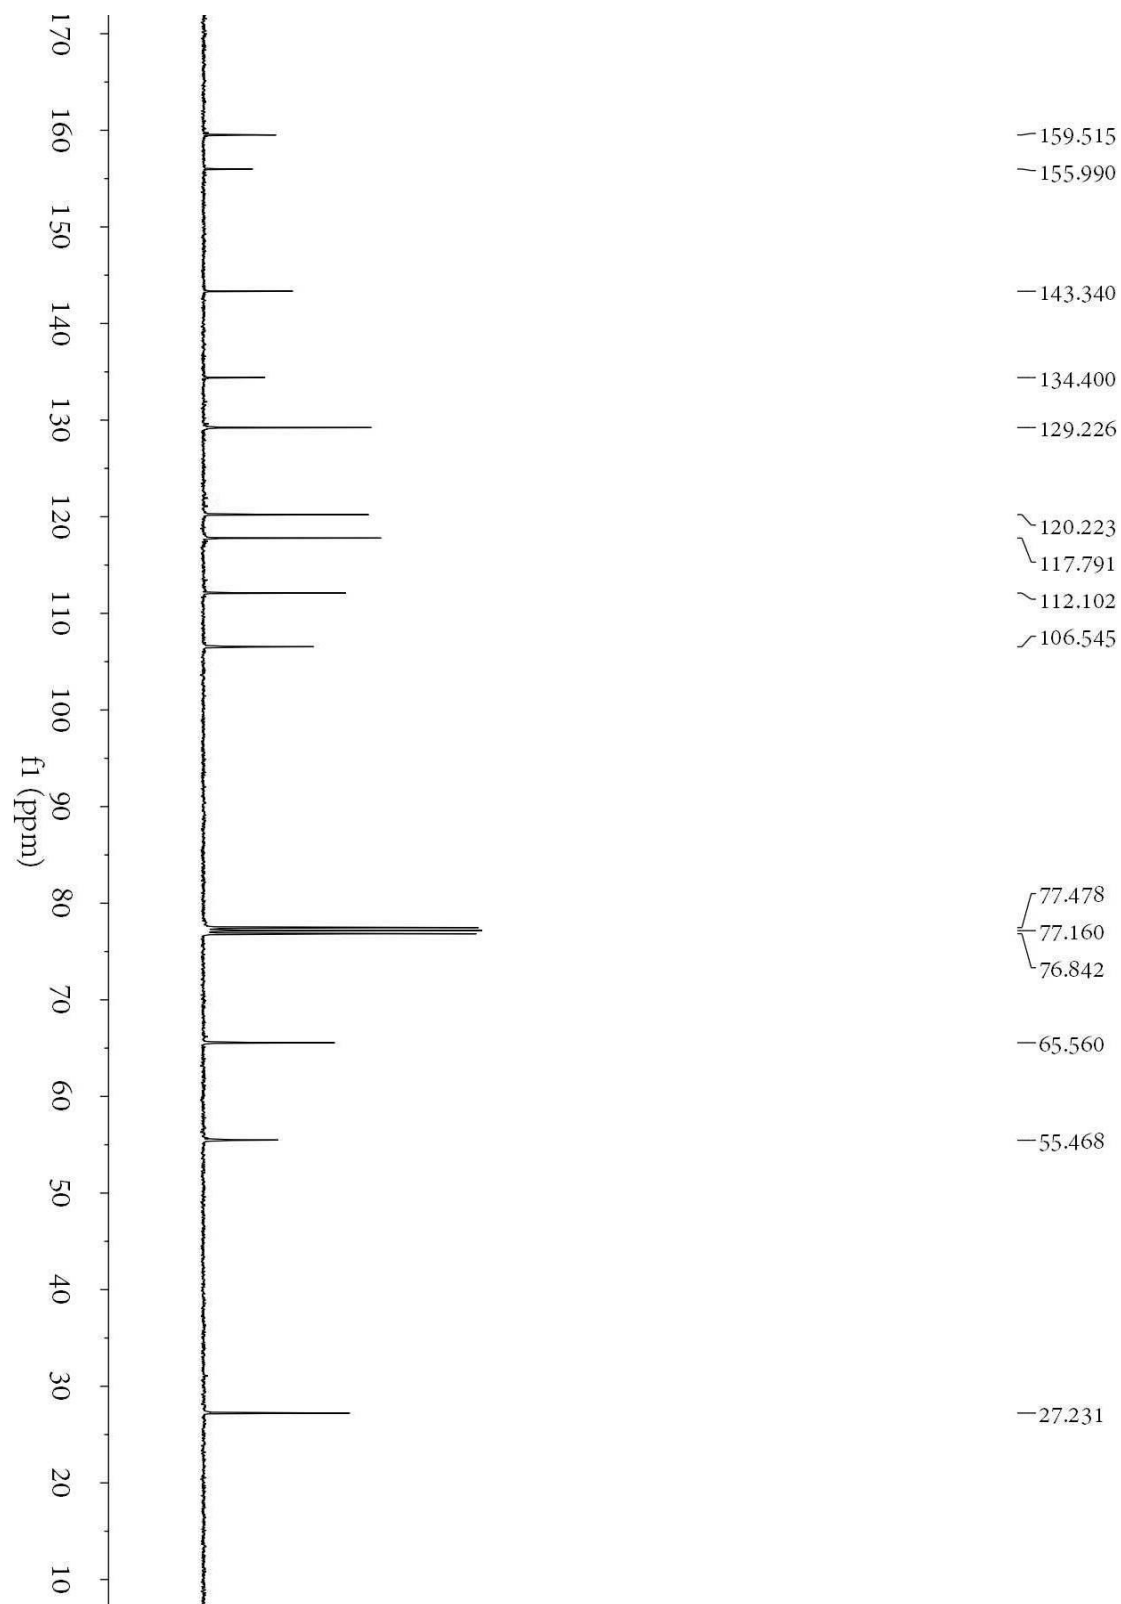

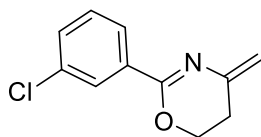

$^1\text{H}$  NMR of **2j**, 83%  
 $\text{CDCl}_3$ , 400 MHz

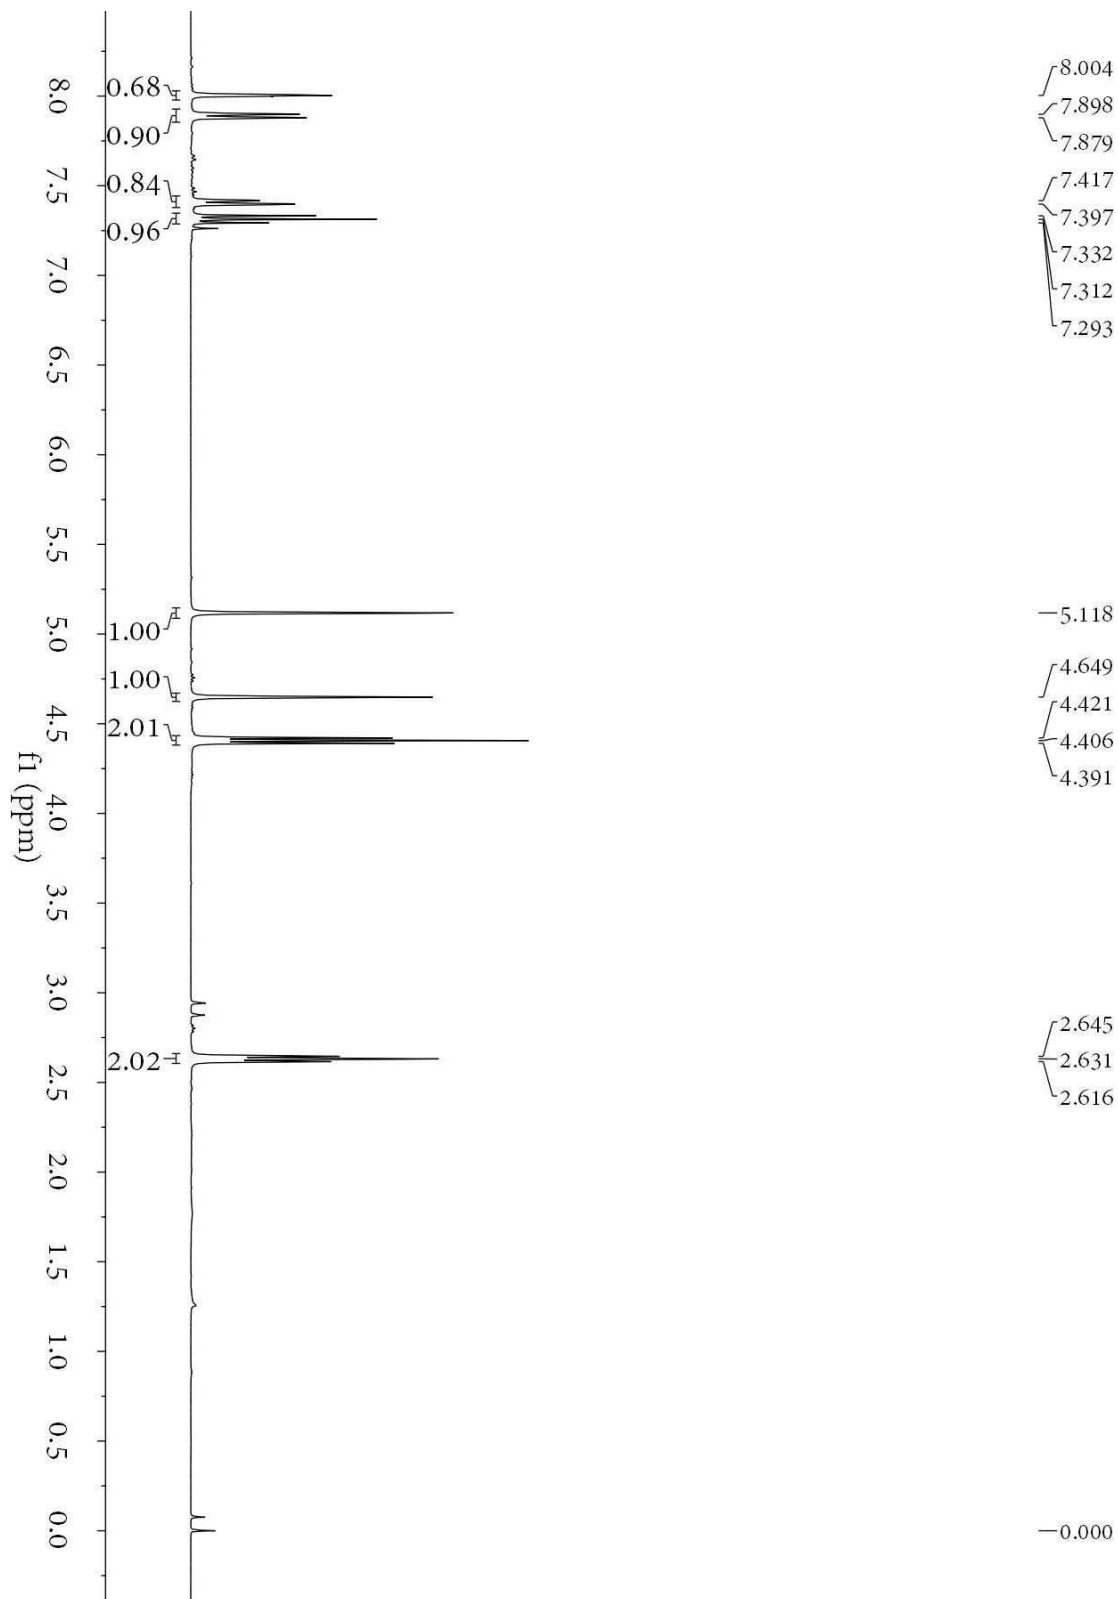

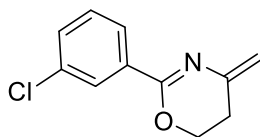

$^{13}\text{C}$  NMR of **2j**, 83%  
 $\text{CDCl}_3$ , 100 MHz

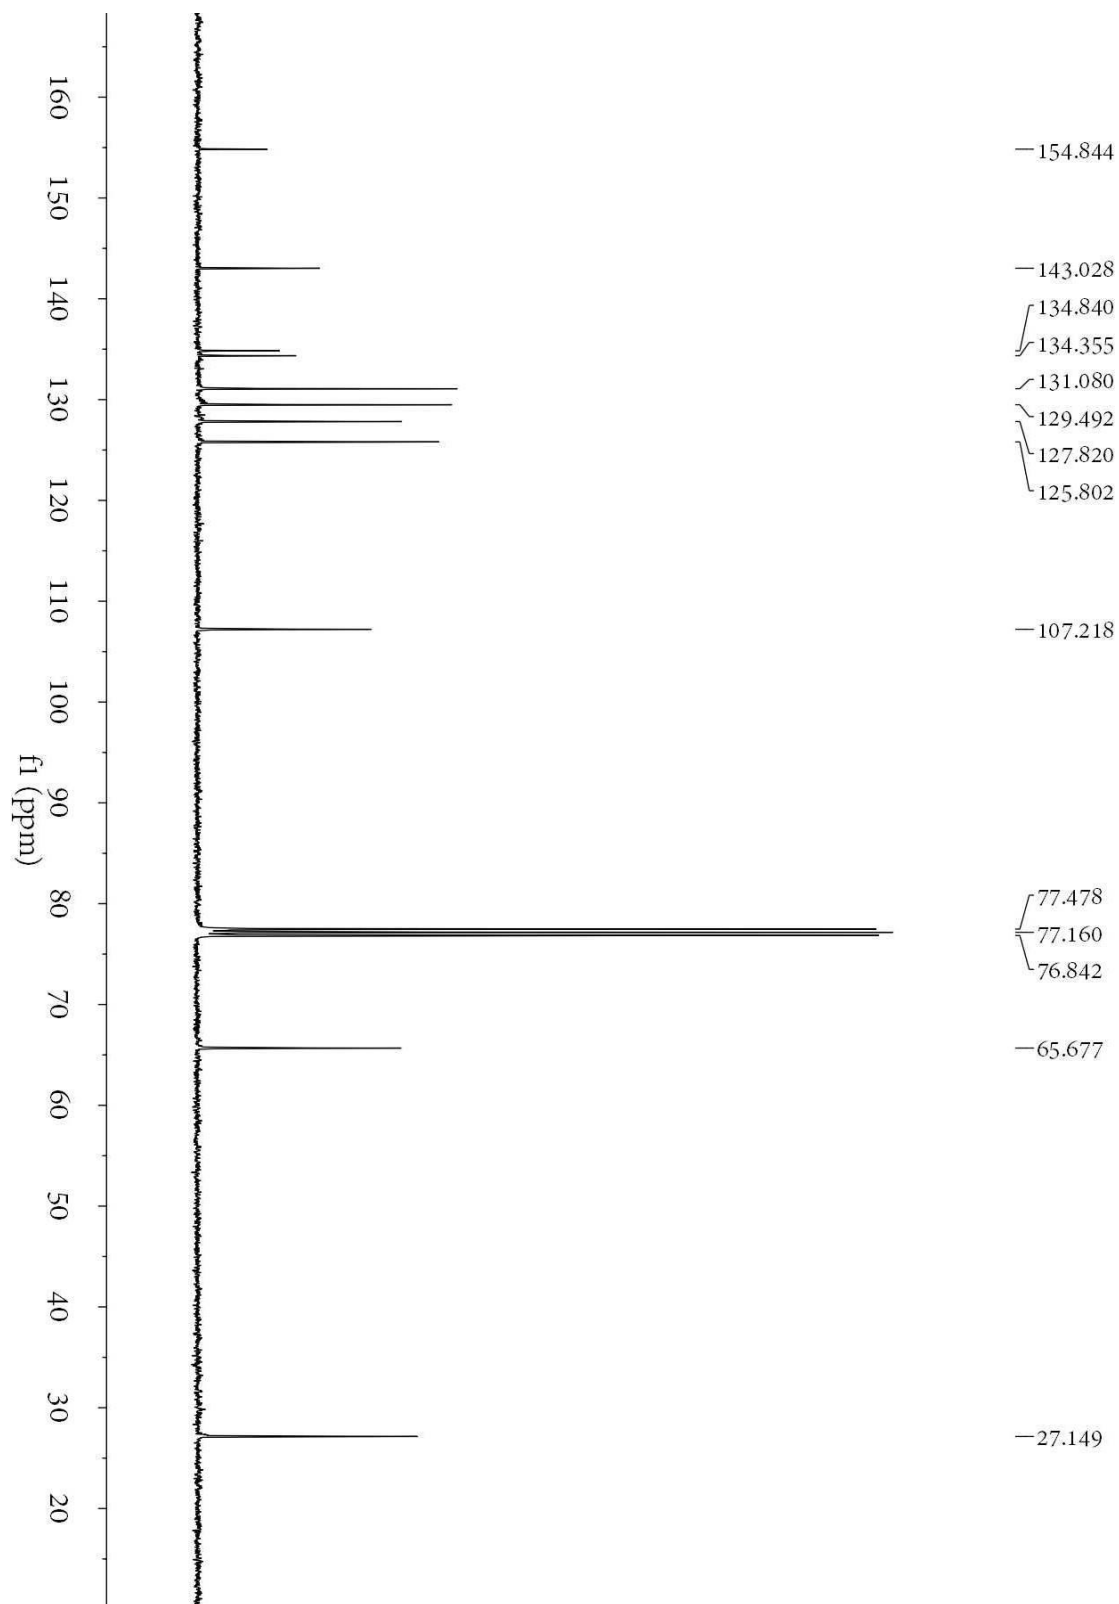

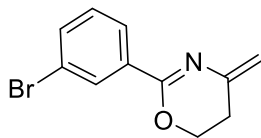

$^1\text{H}$  NMR of **2k**, 77%  
 $\text{CDCl}_3$ , 400 MHz

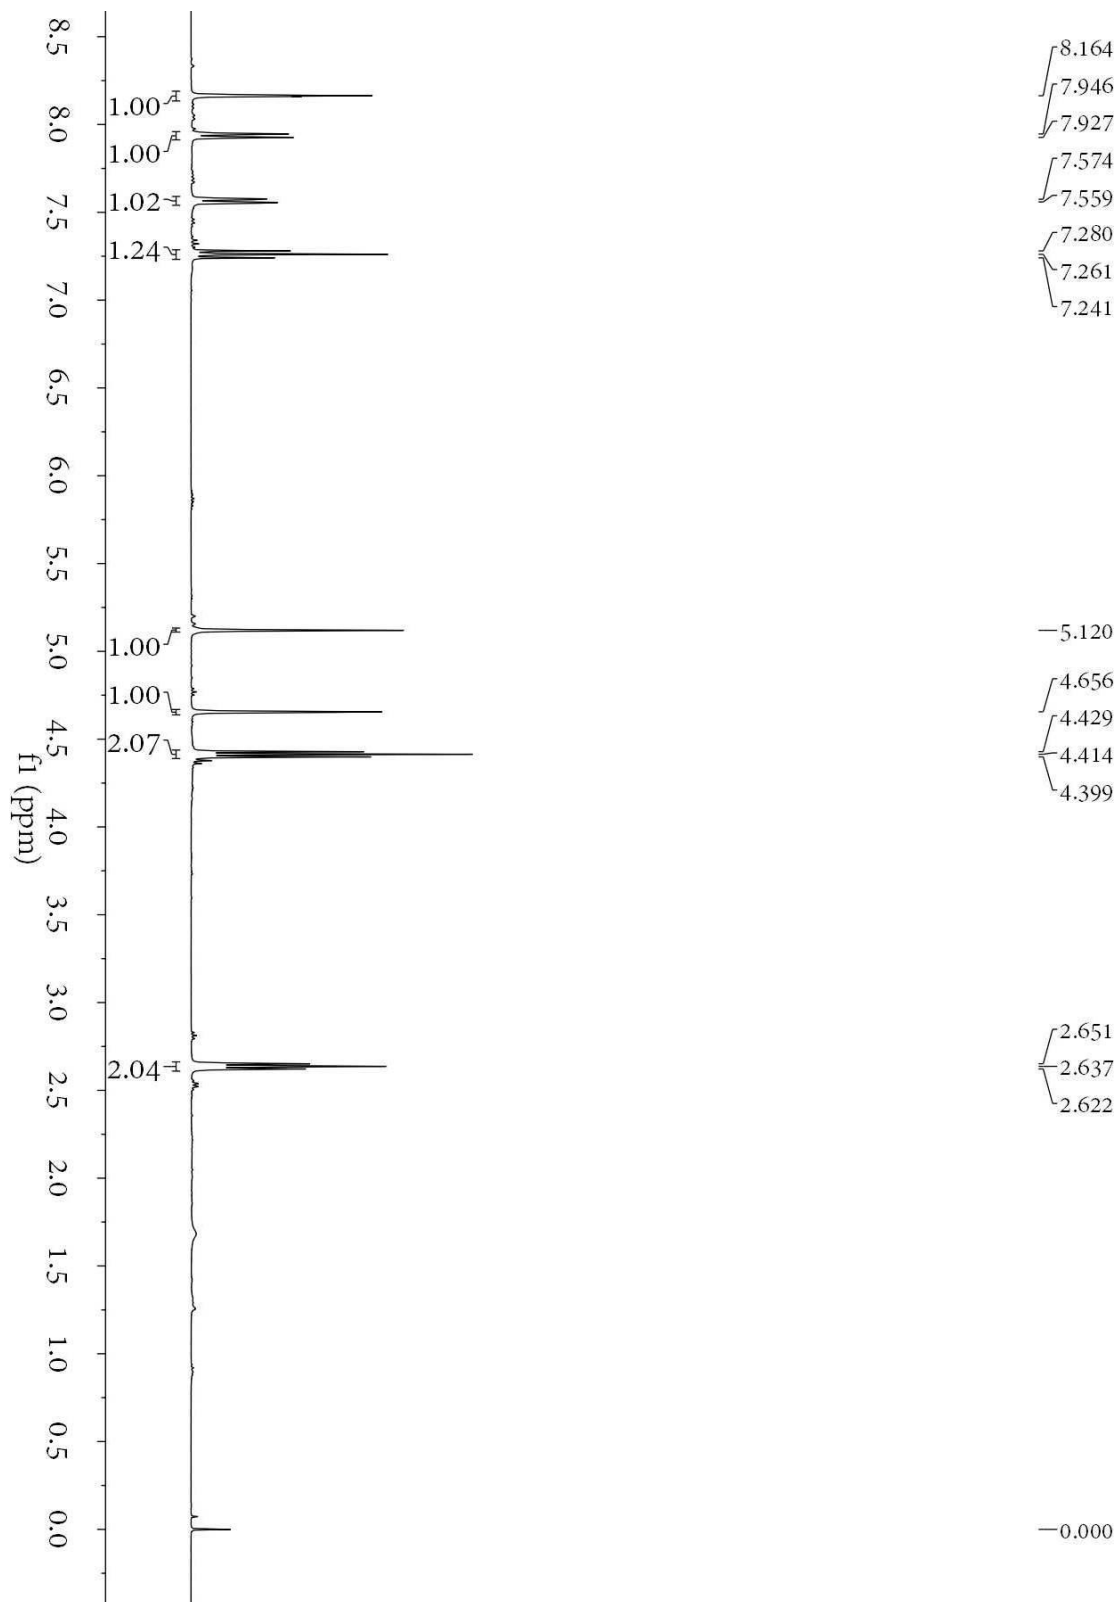

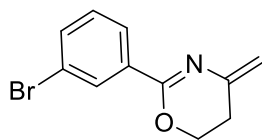

$^{13}\text{C}$  NMR of **2k**, 77%  
 $\text{CDCl}_3$ , 100 MHz

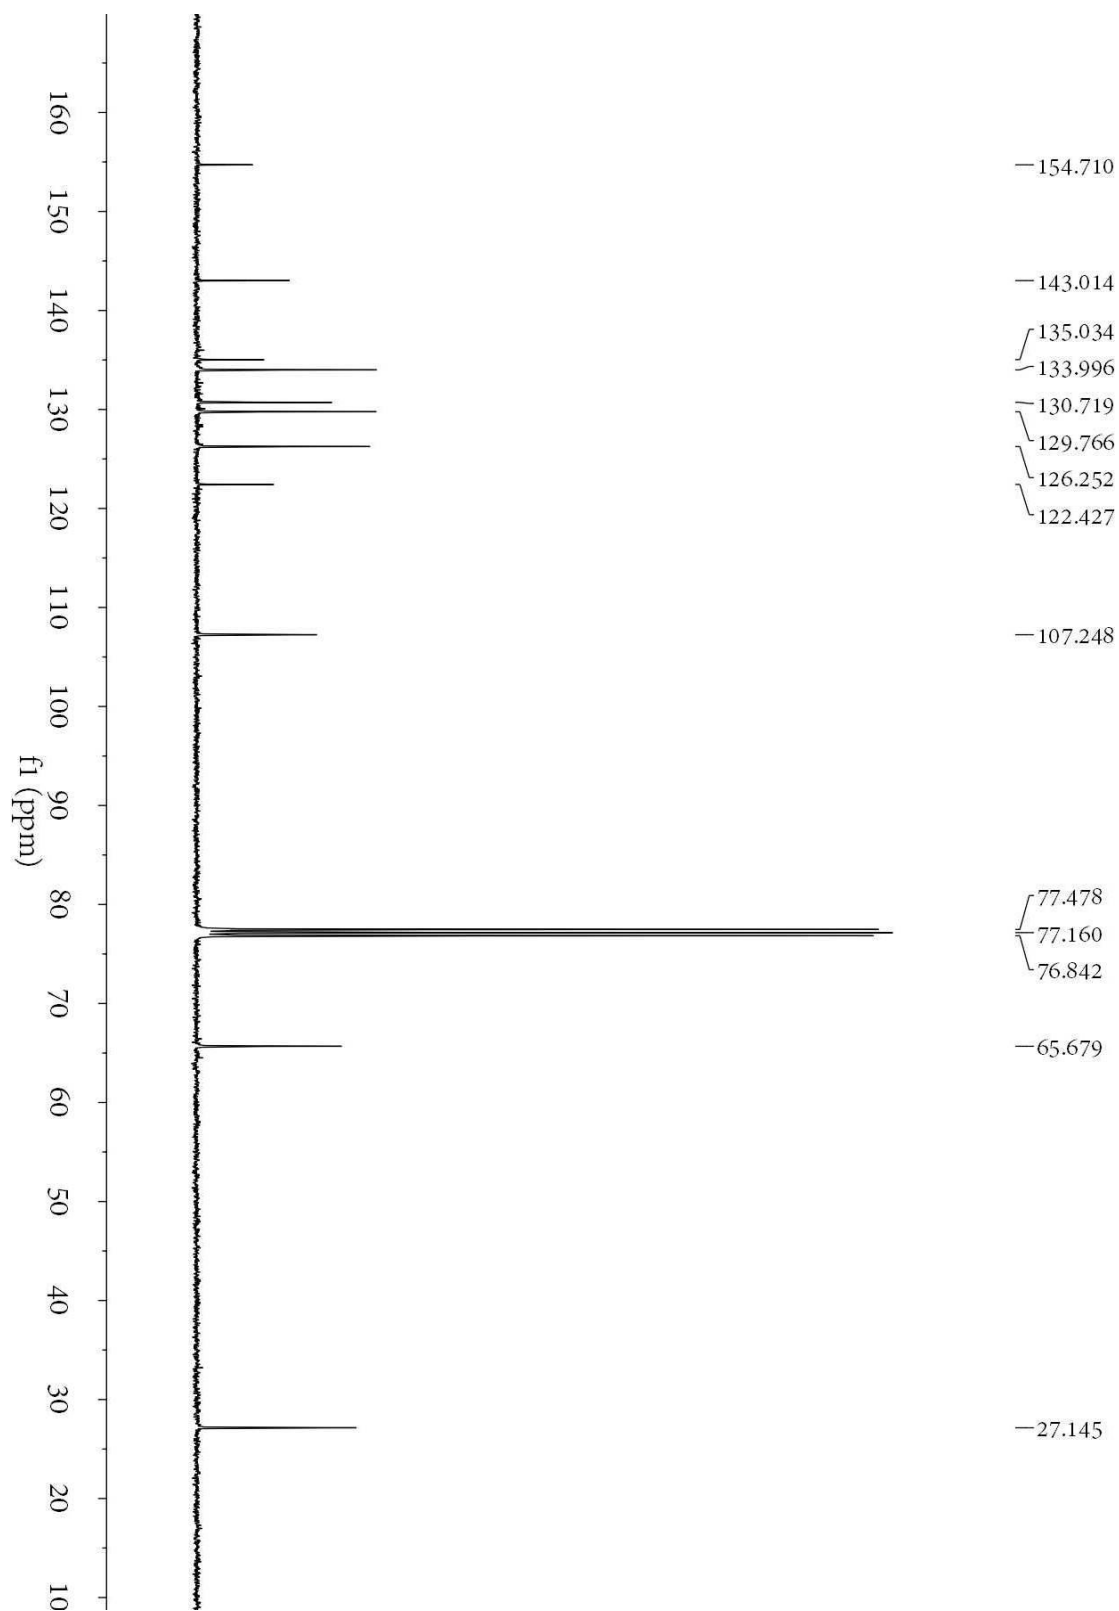

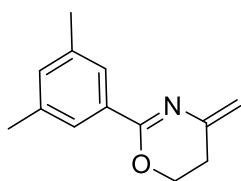

$^1\text{H}$  NMR of **2I**, 82%  
 $\text{CDCl}_3$ , 400 MHz

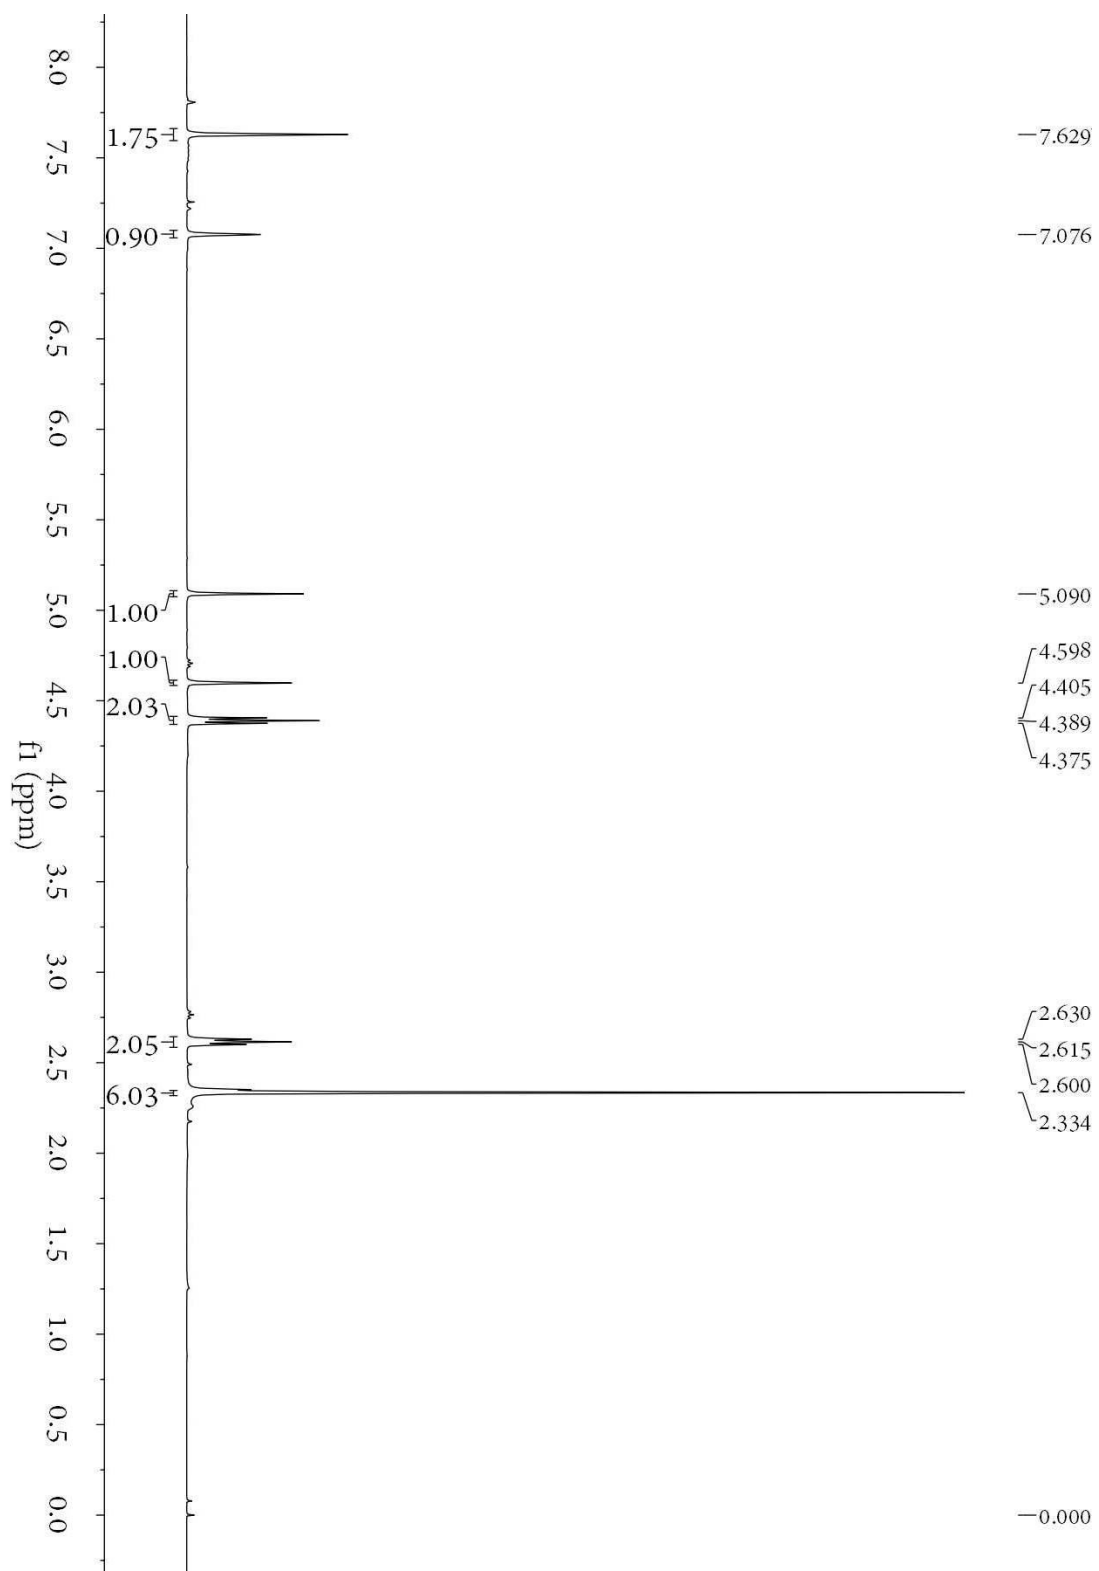



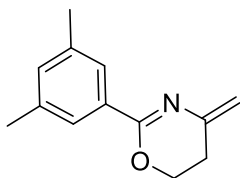

$^{13}\text{C}$  NMR of **21**, 82%  
CDCl<sub>3</sub>, 100 MHz

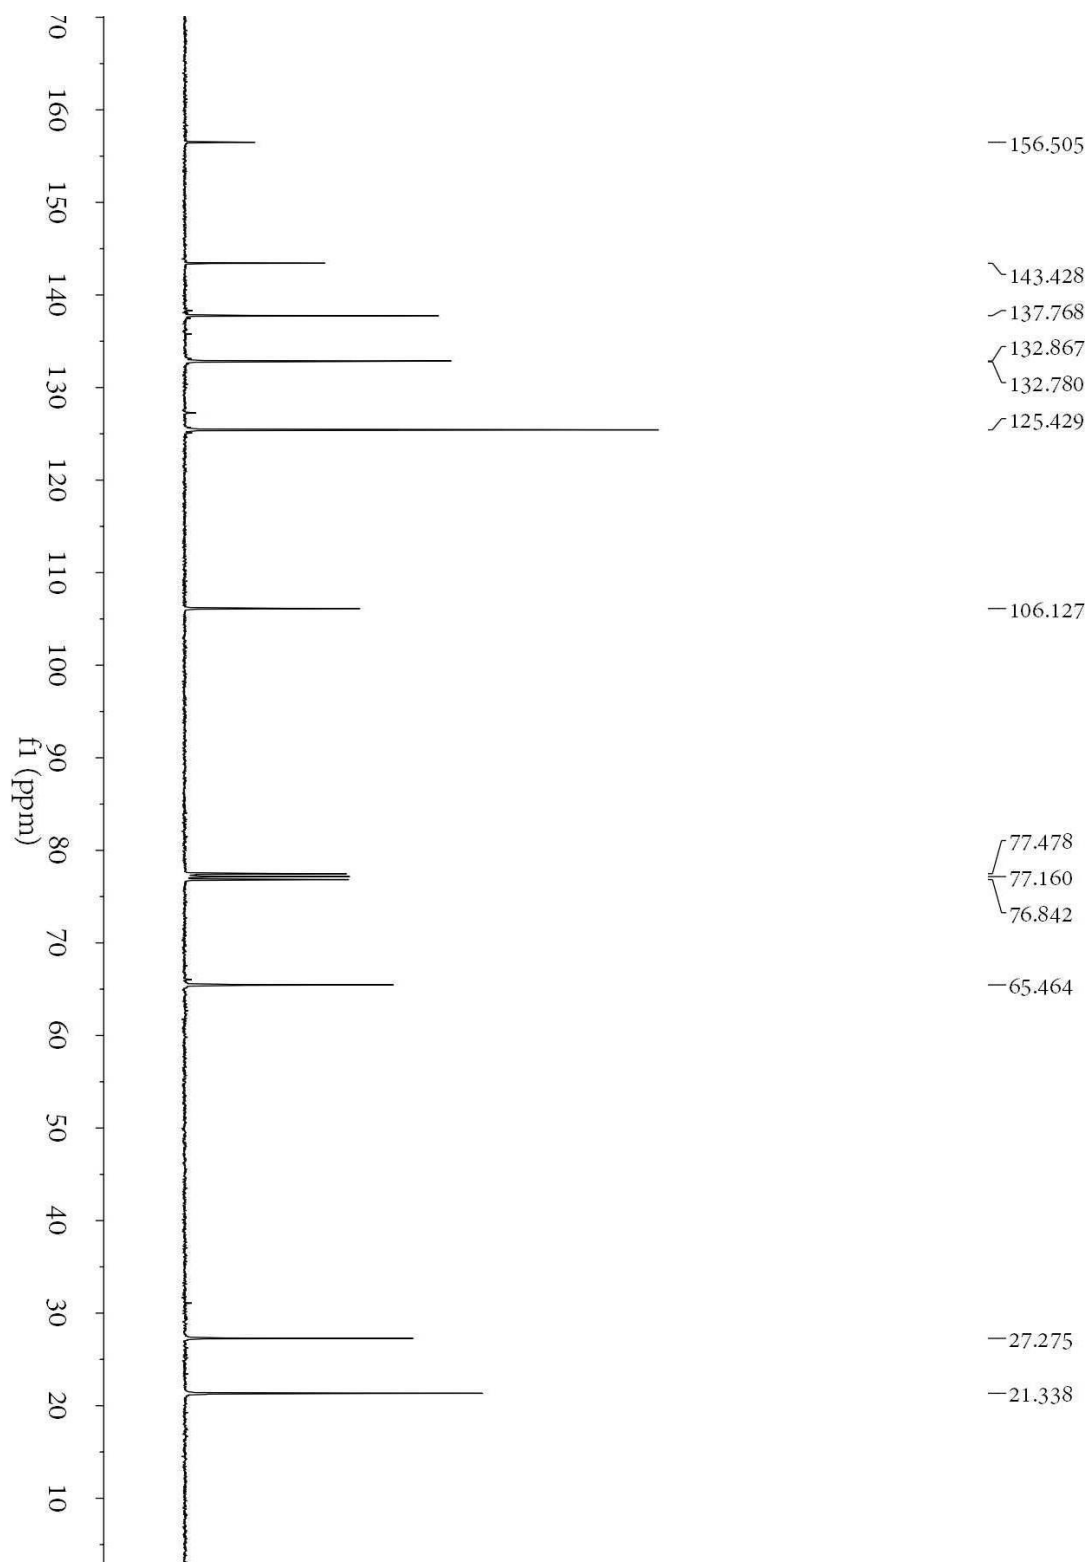

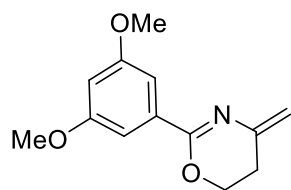

$^1\text{H}$  NMR of **2m**, 58%  
 $\text{CDCl}_3$ , 400 MHz

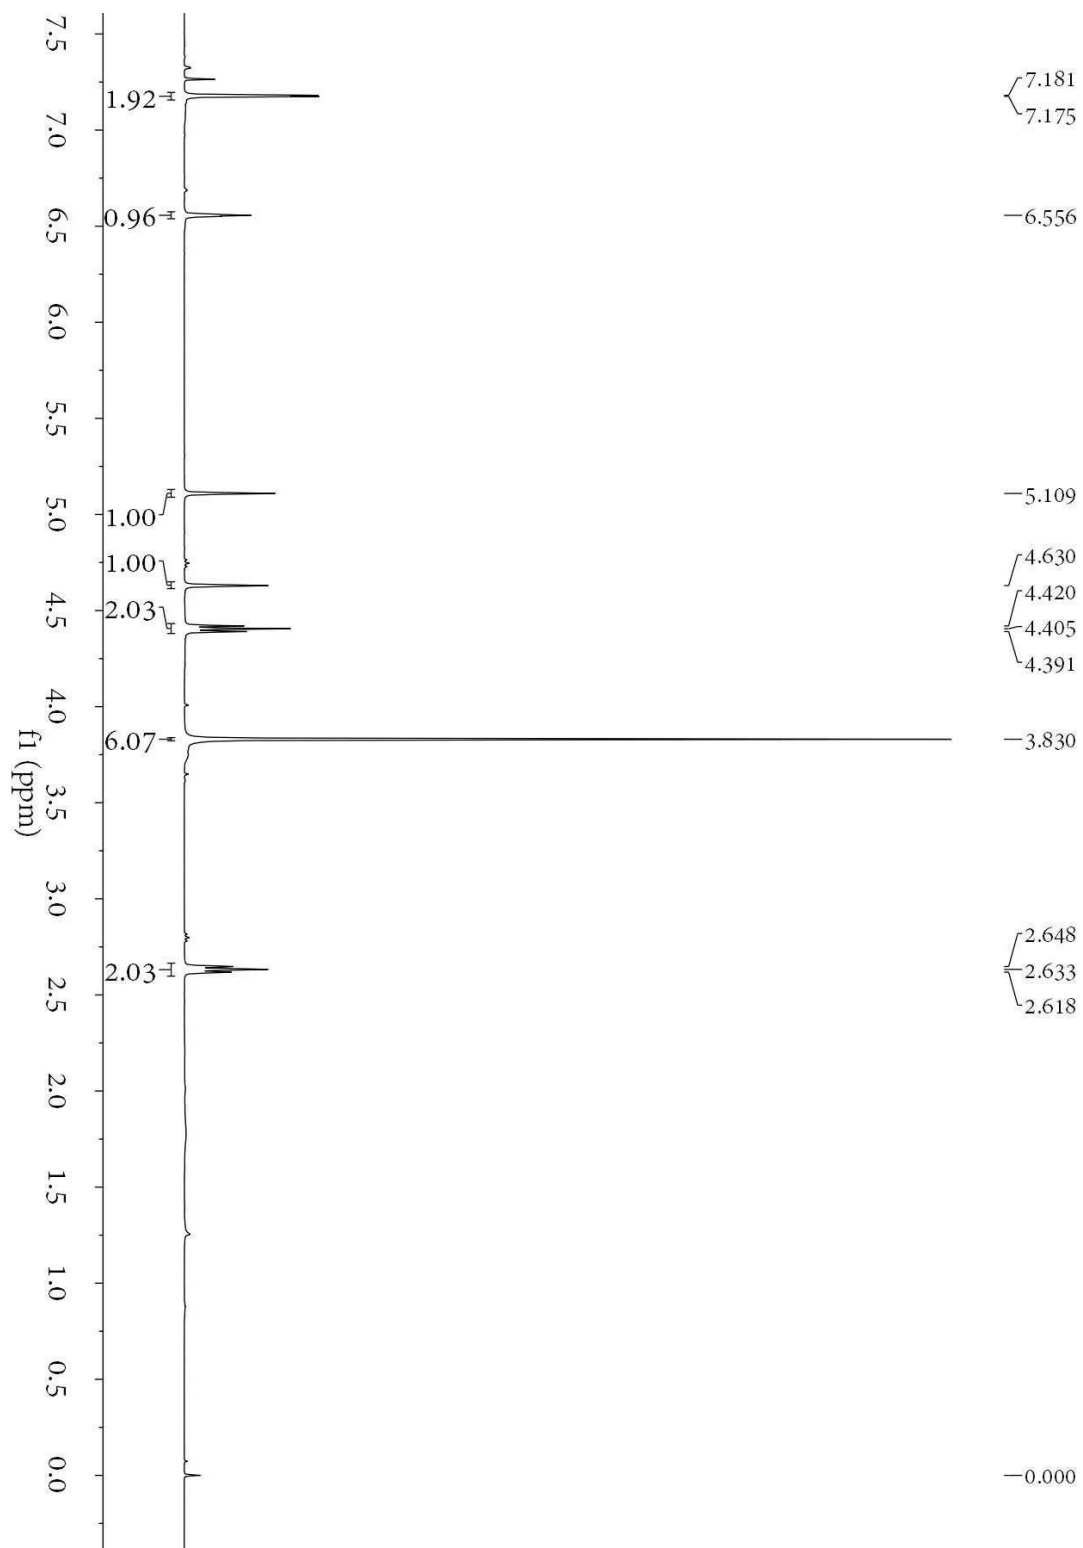

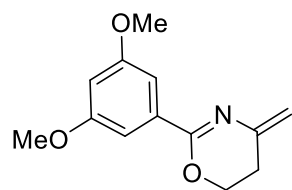

$^{13}\text{C}$  NMR of **2m**, 58%  
 $\text{CDCl}_3$ , 100 MHz

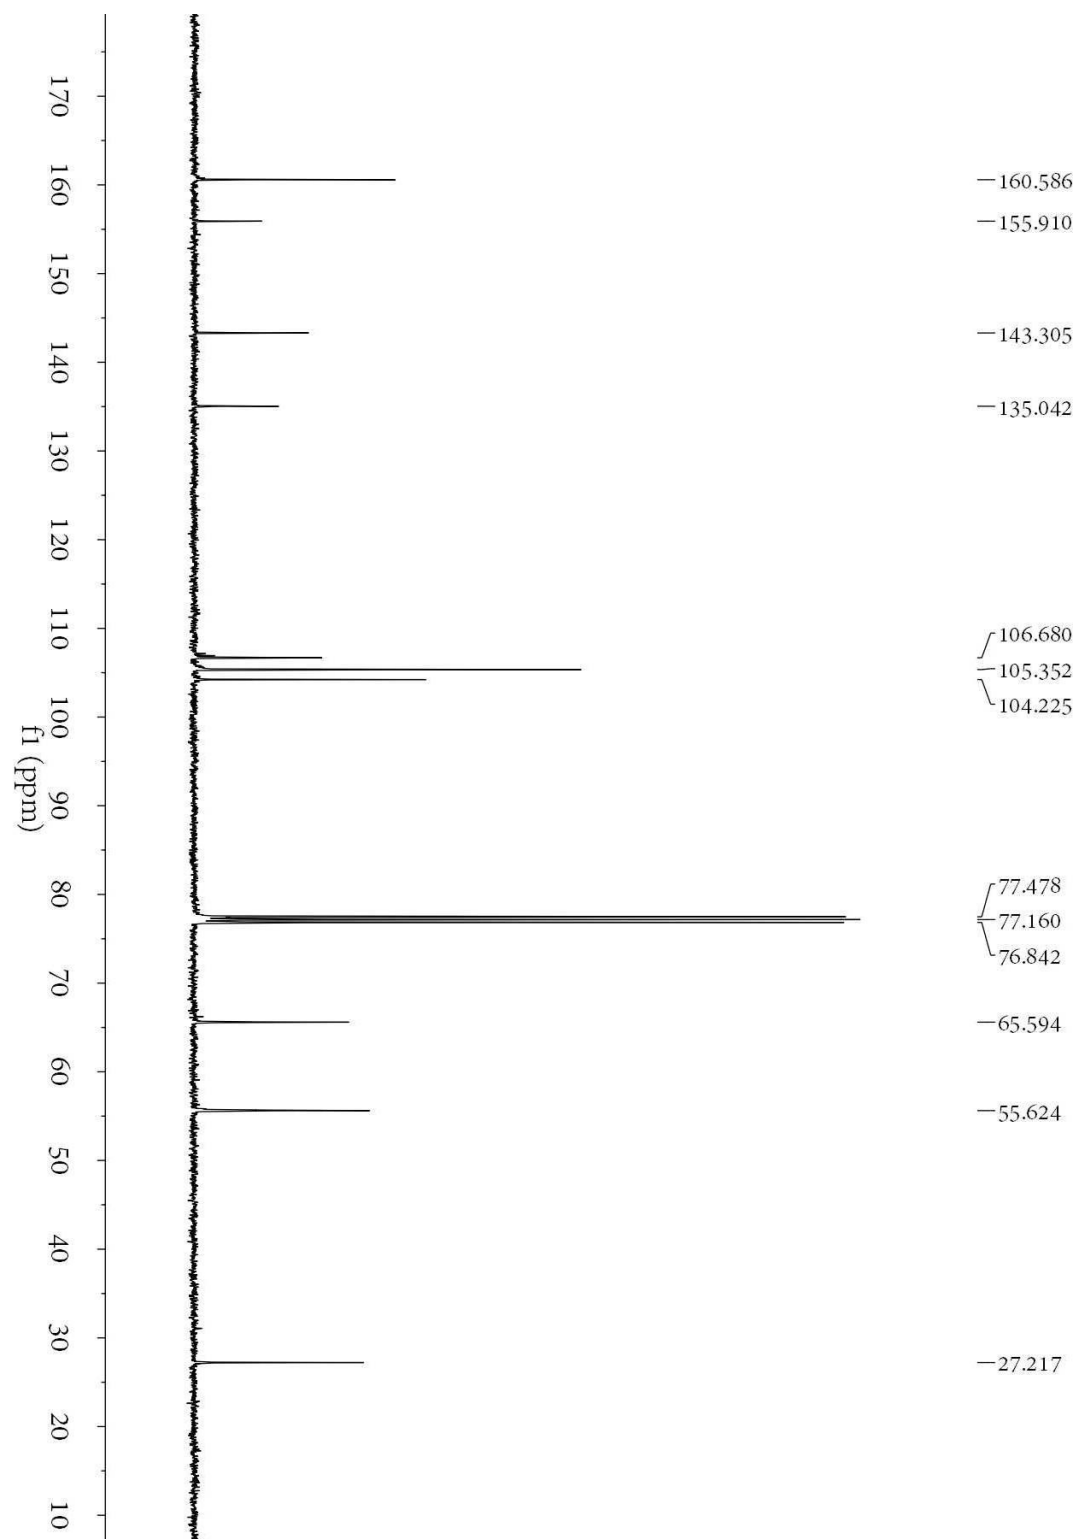

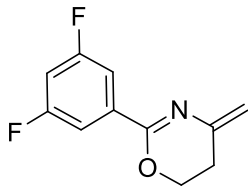

$^1\text{H}$  NMR of **2n**, 62%  
 $\text{CDCl}_3$ , 400 MHz

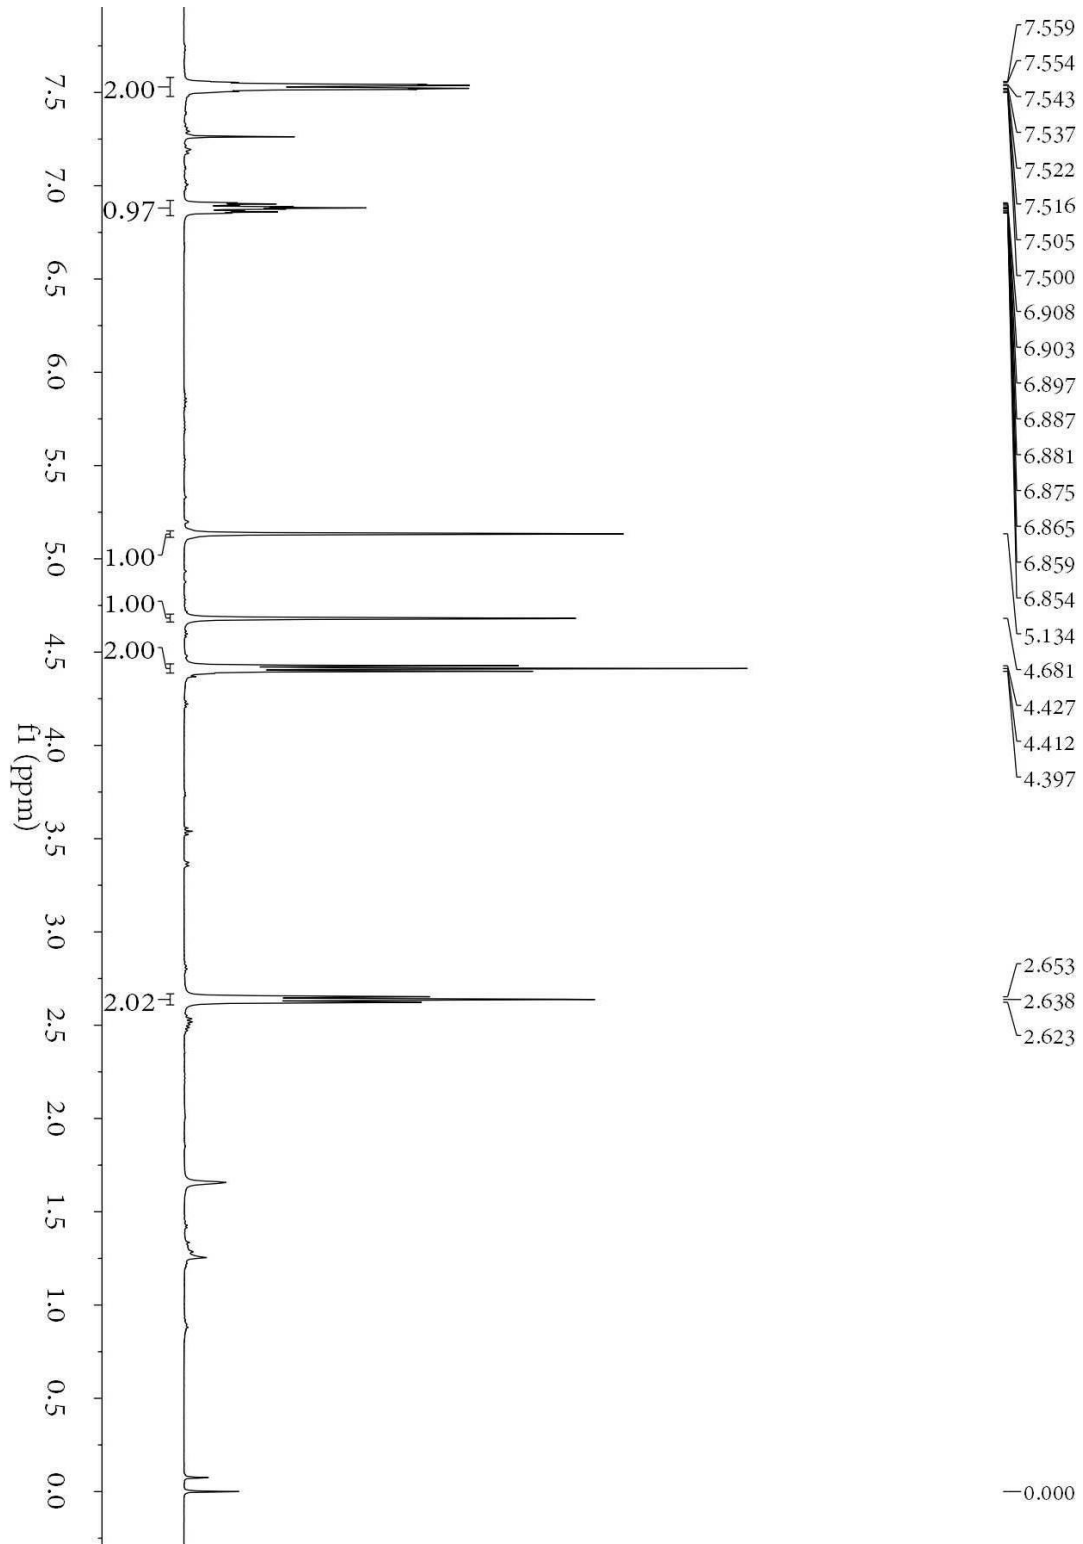

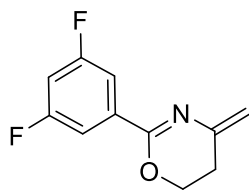

$^{13}\text{C}$  NMR of **2n**, 62%

$\text{CDCl}_3$ , 100 MHz

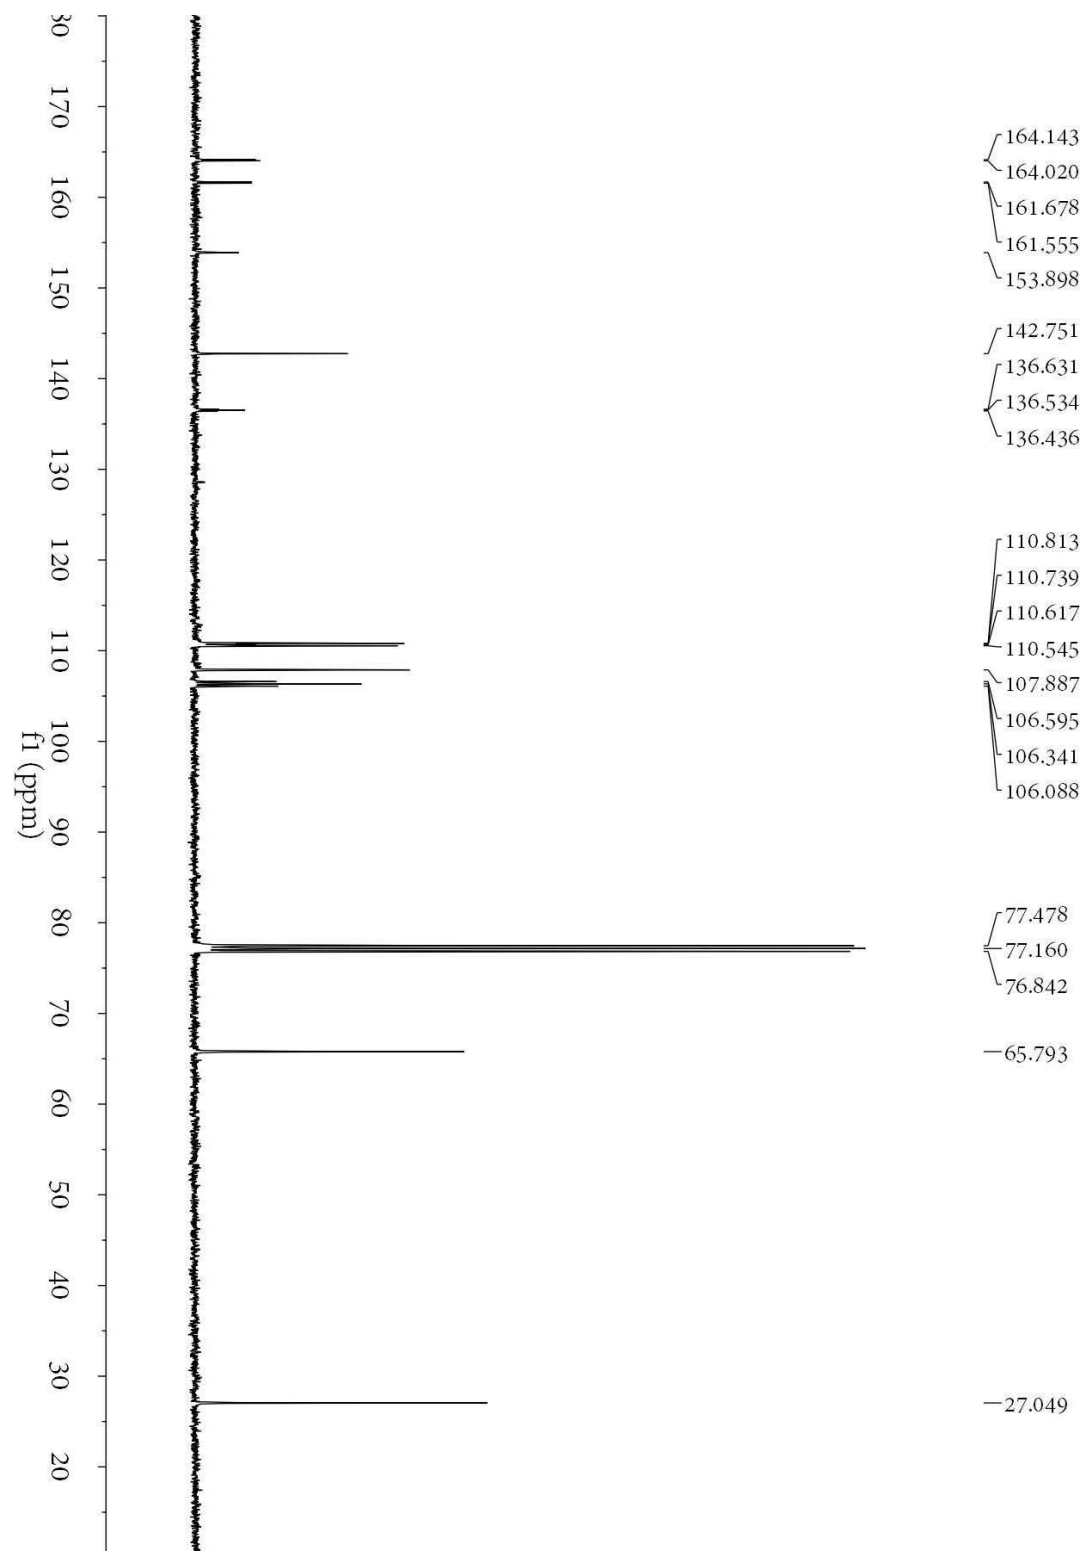

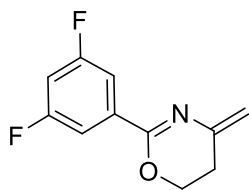

$^{19}\text{F}$  NMR of **2n**, 62%  
 $\text{CDCl}_3$ , 564 MHz

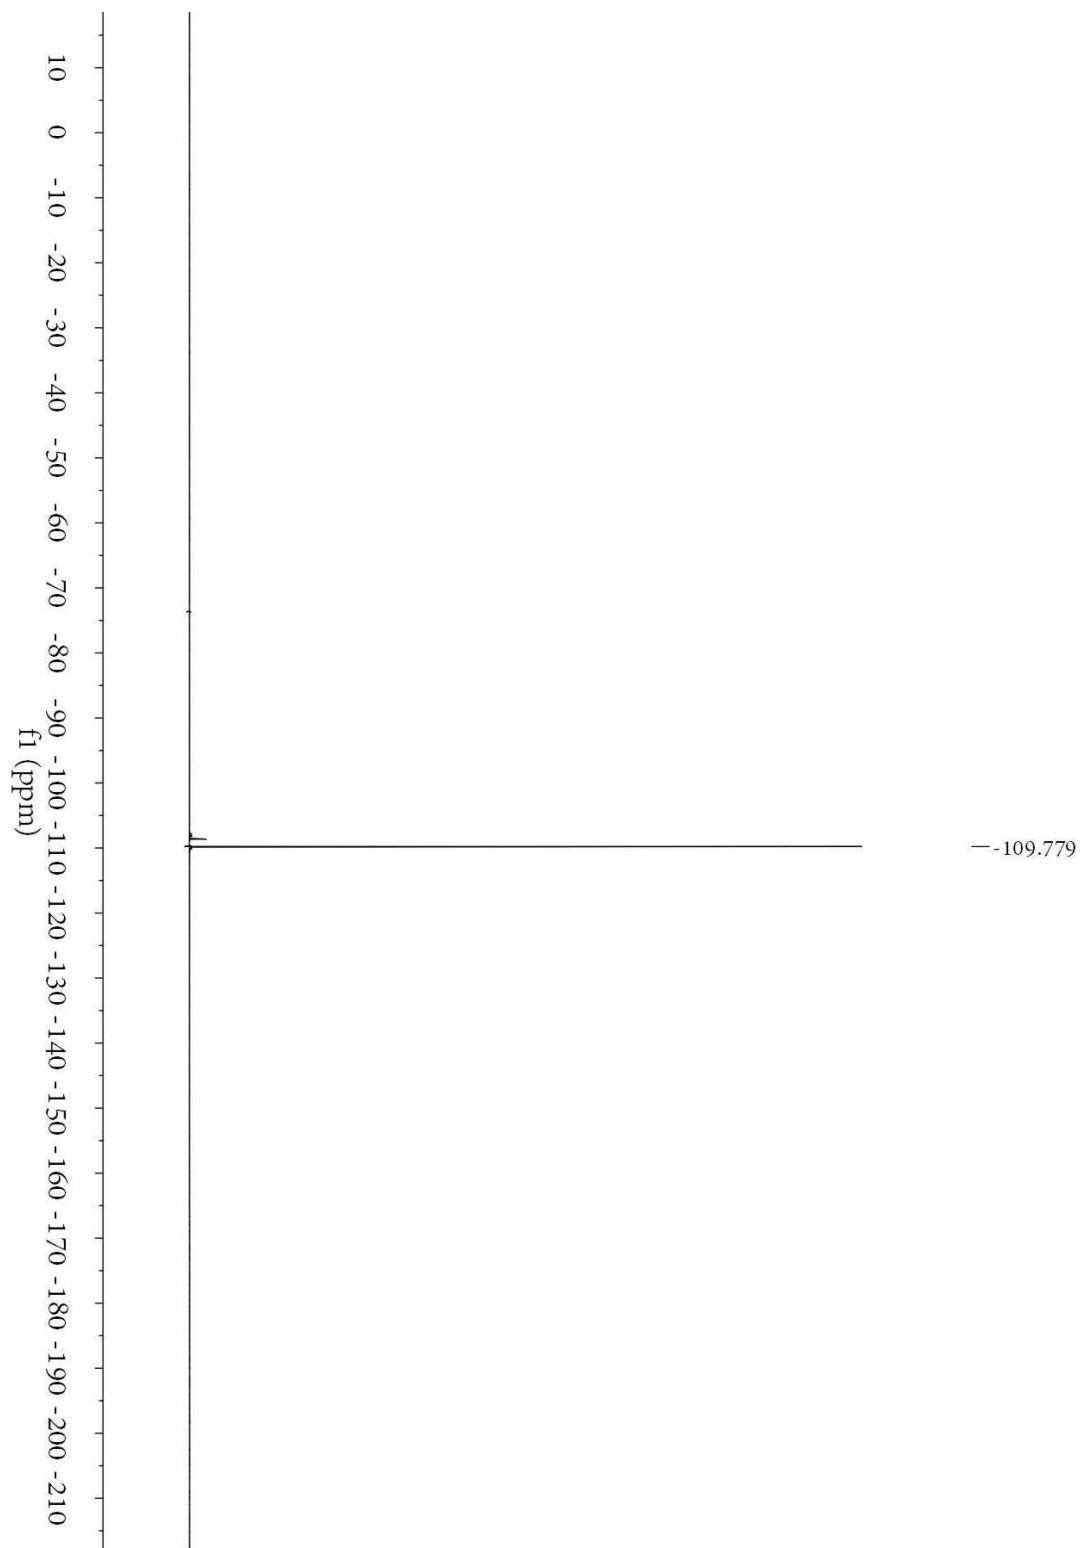

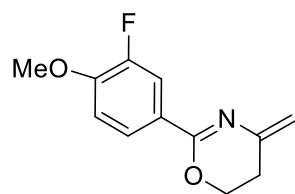

$^1\text{H}$  NMR of **2o**, 75%  
 $\text{CDCl}_3$ , 400 MHz

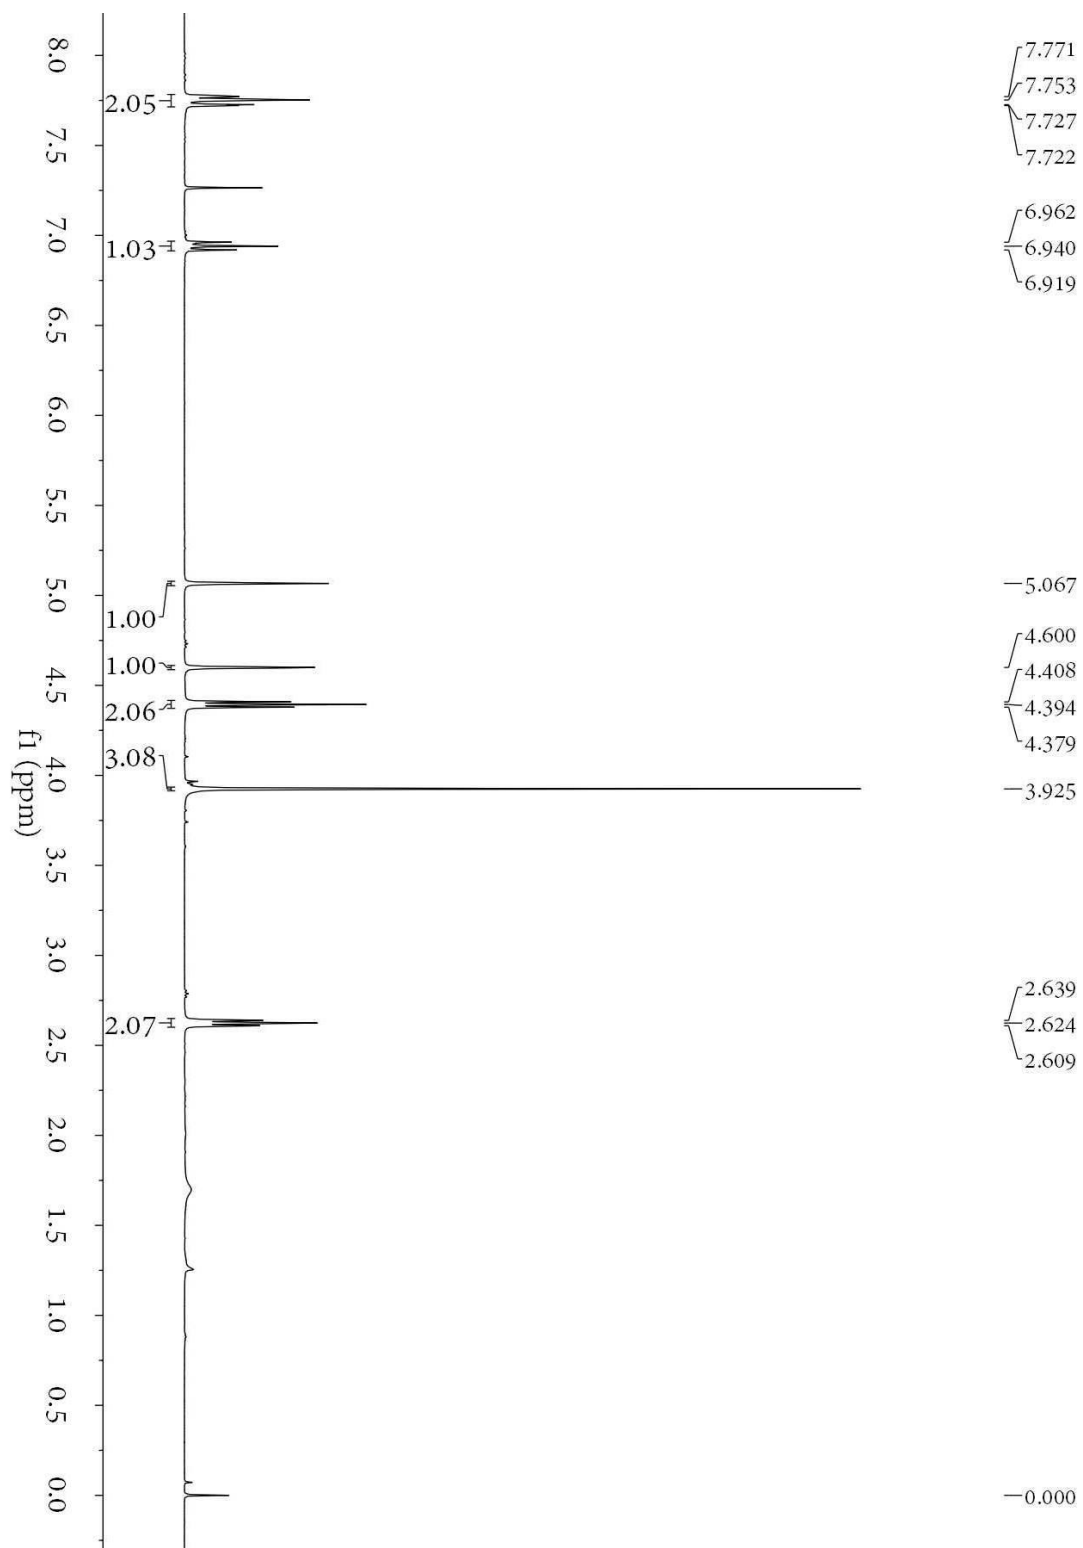

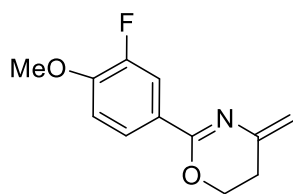

$^{13}\text{C}$  NMR of **2o**, 75%

$\text{CDCl}_3$ , 100 MHz

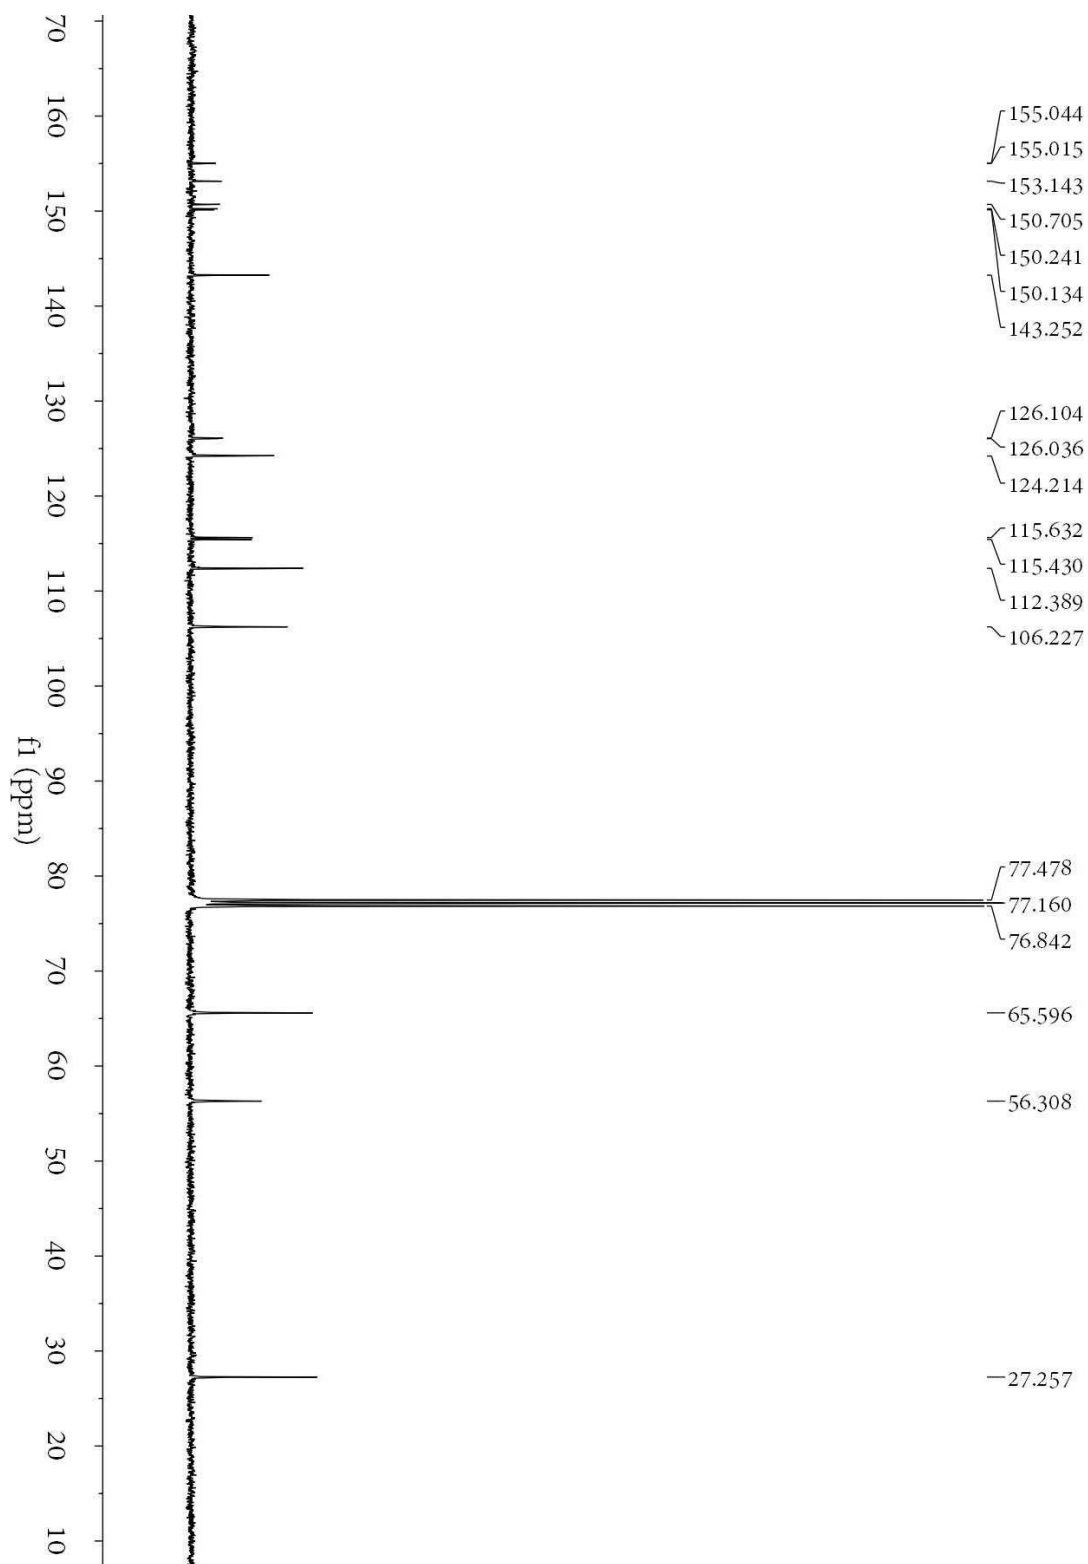



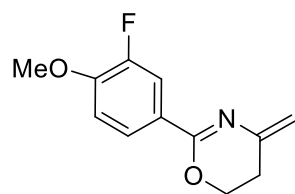

$^{19}\text{F}$  NMR of **2o**, 75%  
 $\text{CDCl}_3$ , 564 MHz

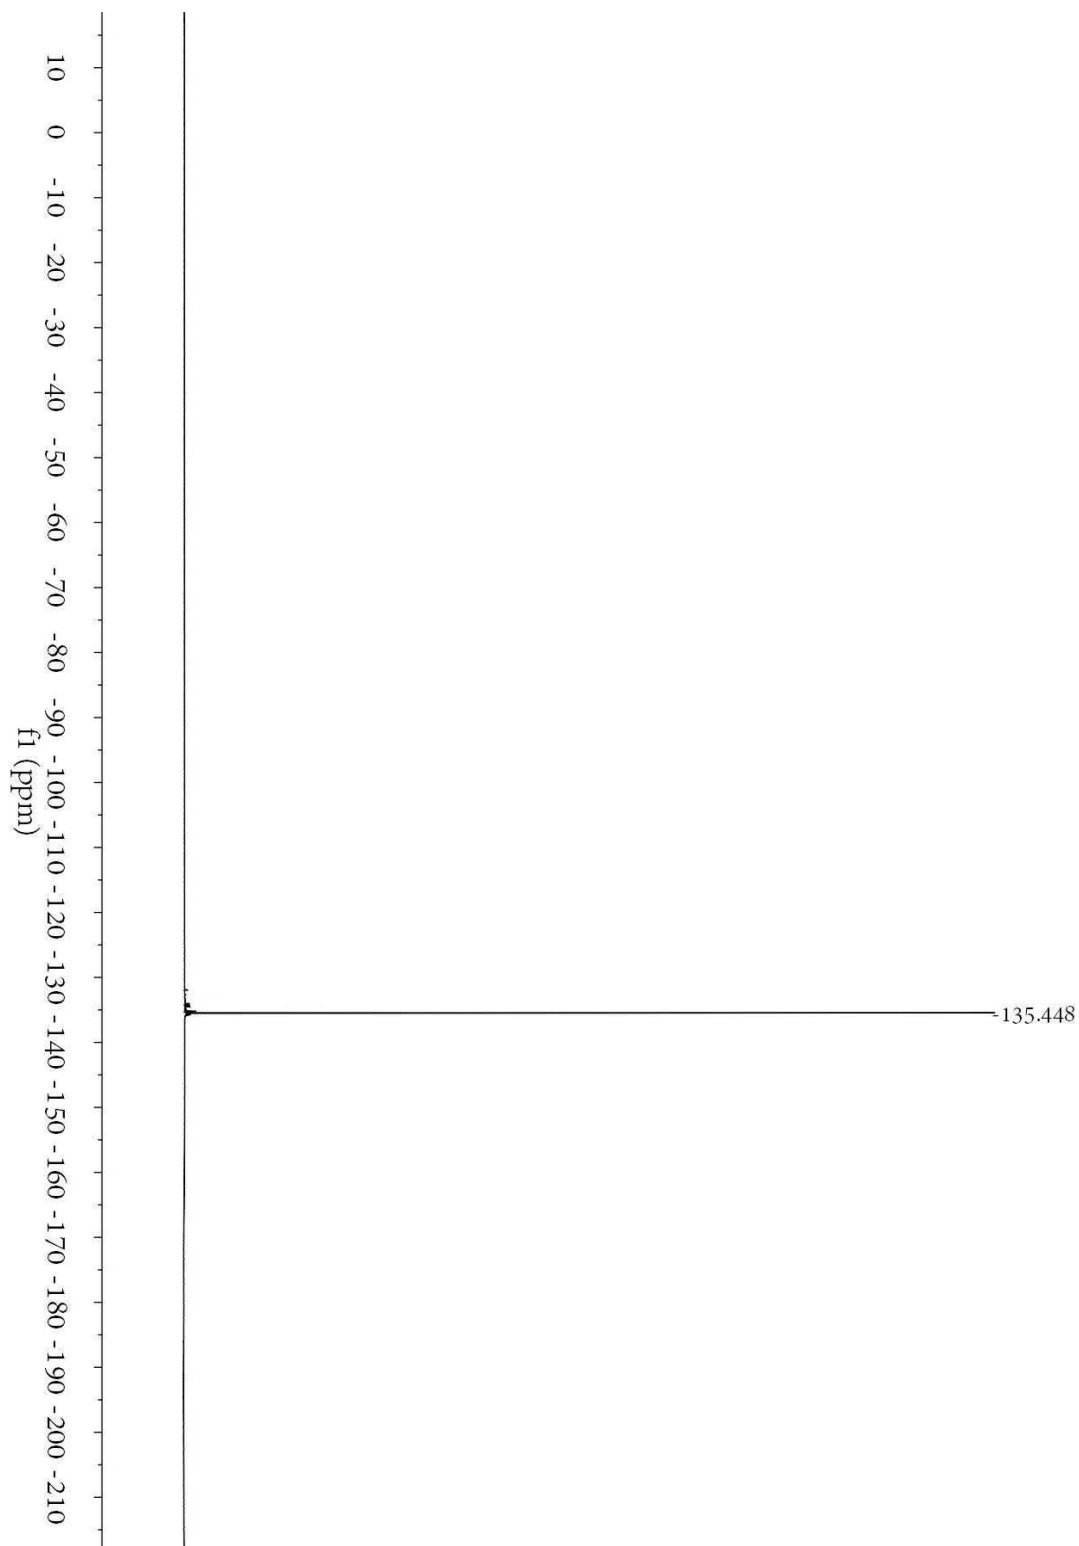

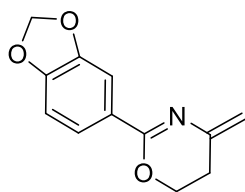

$^1\text{H}$  NMR of **2p**, 73%  
 $\text{CDCl}_3$ , 400 MHz

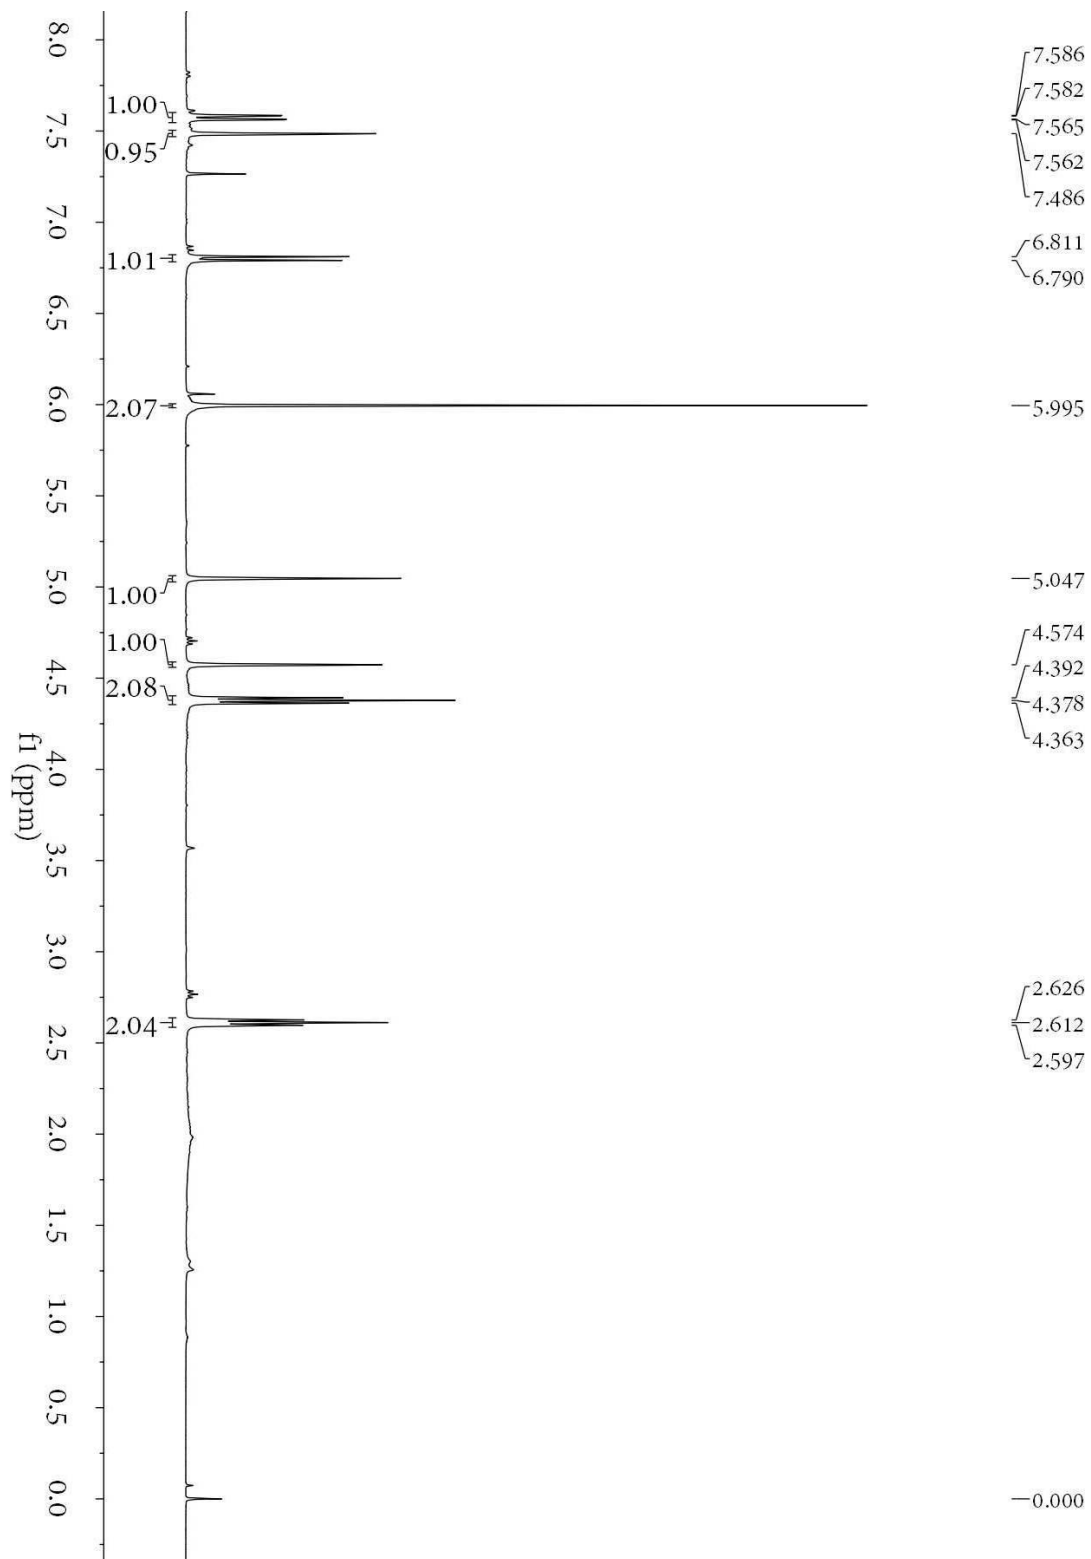

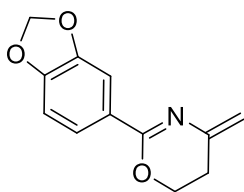

$^{13}\text{C}$  NMR of **2p**, 73%  
CDCl<sub>3</sub>, 100 MHz

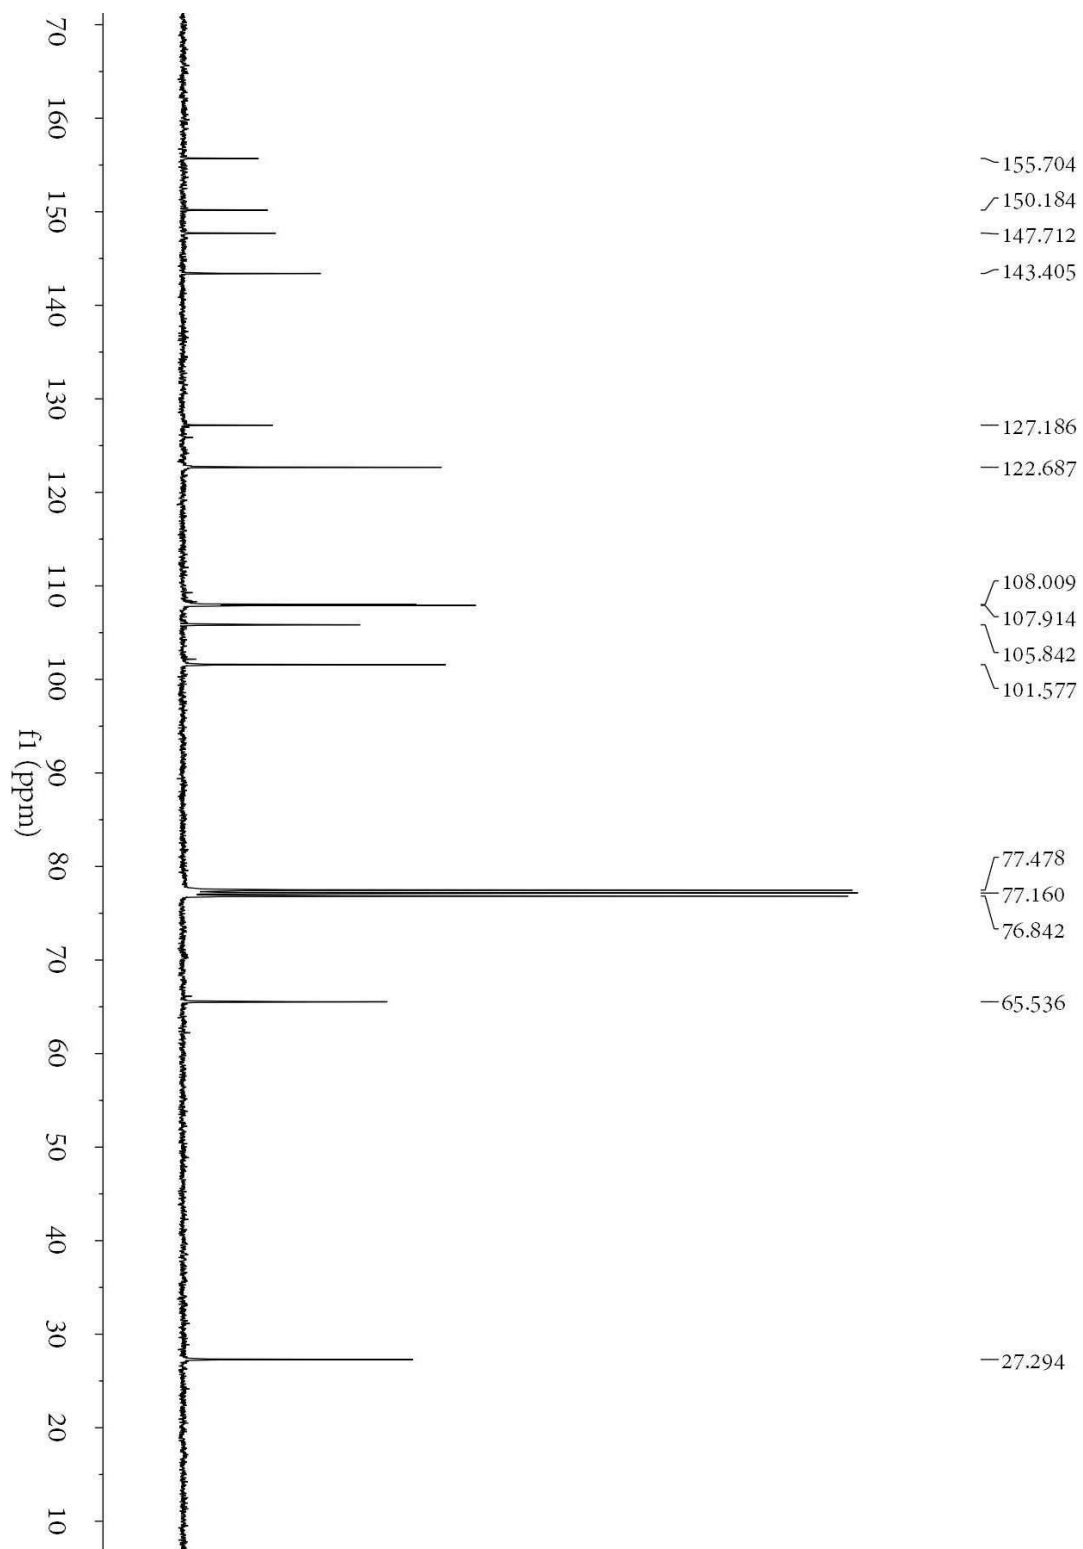

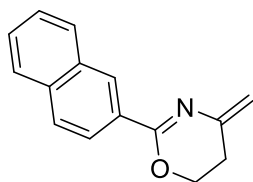

$^1\text{H}$  NMR of **2q**, 72%  
 $\text{CDCl}_3$ , 400 MHz

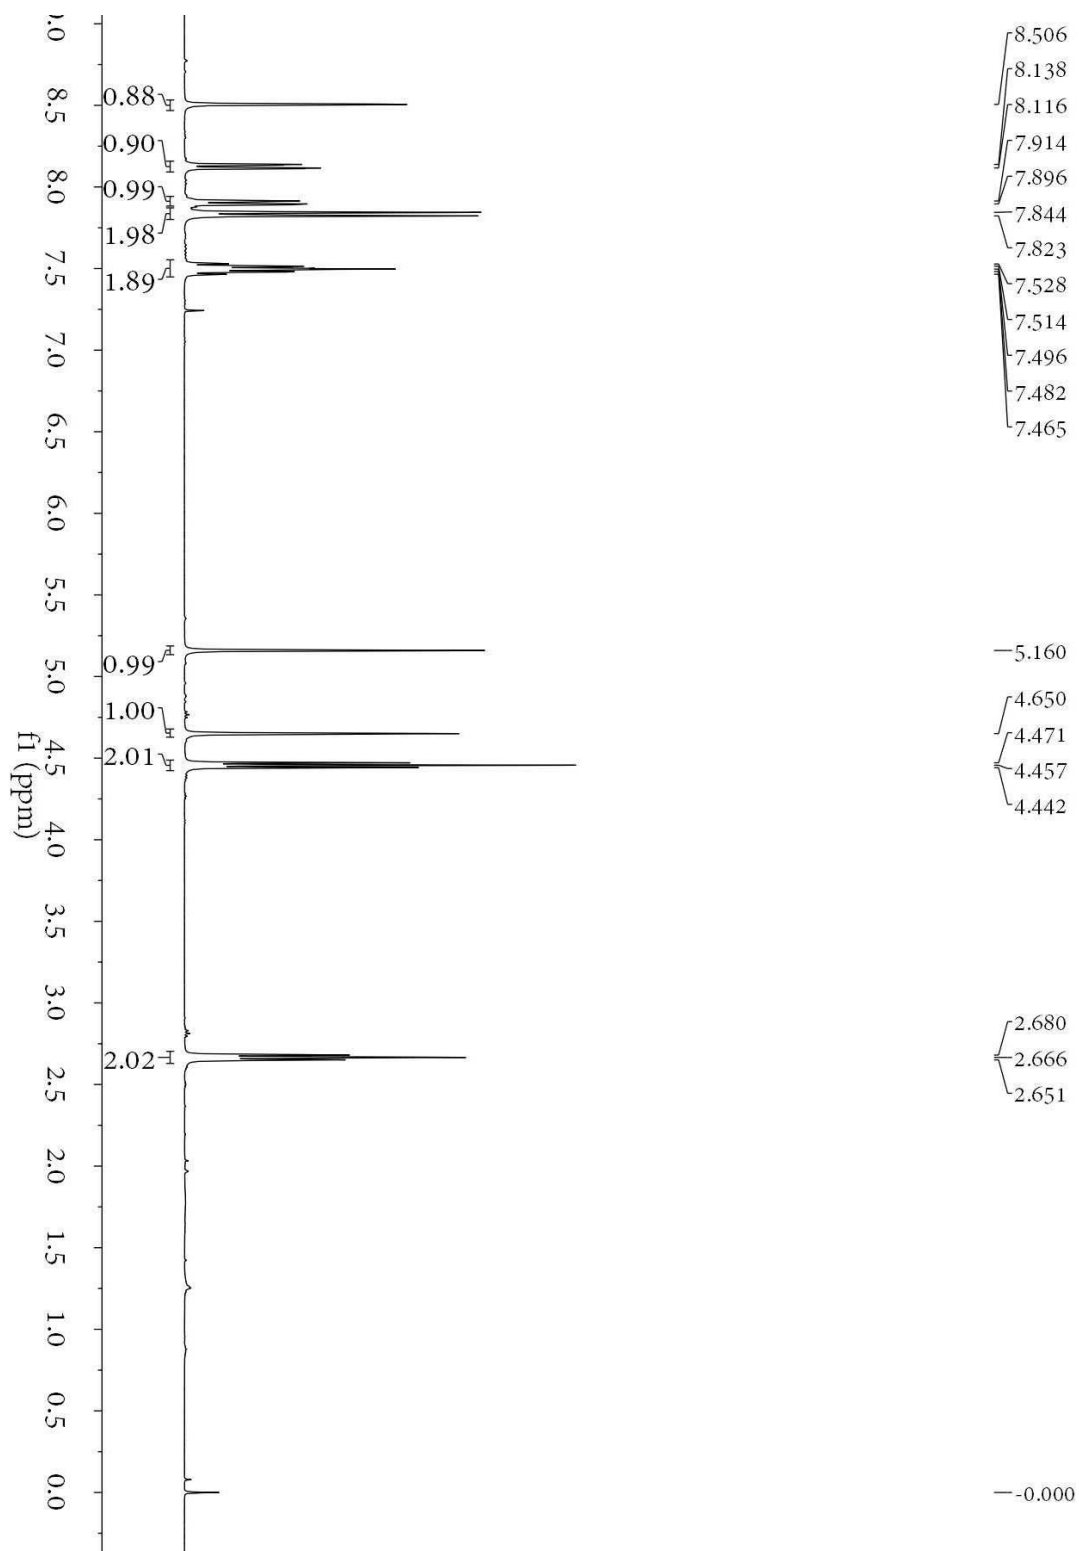

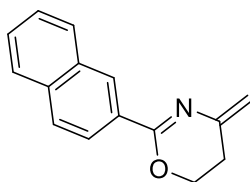

$^{13}\text{C}$  NMR of **2q**, 72%  
 $\text{CDCl}_3$ , 100 MHz

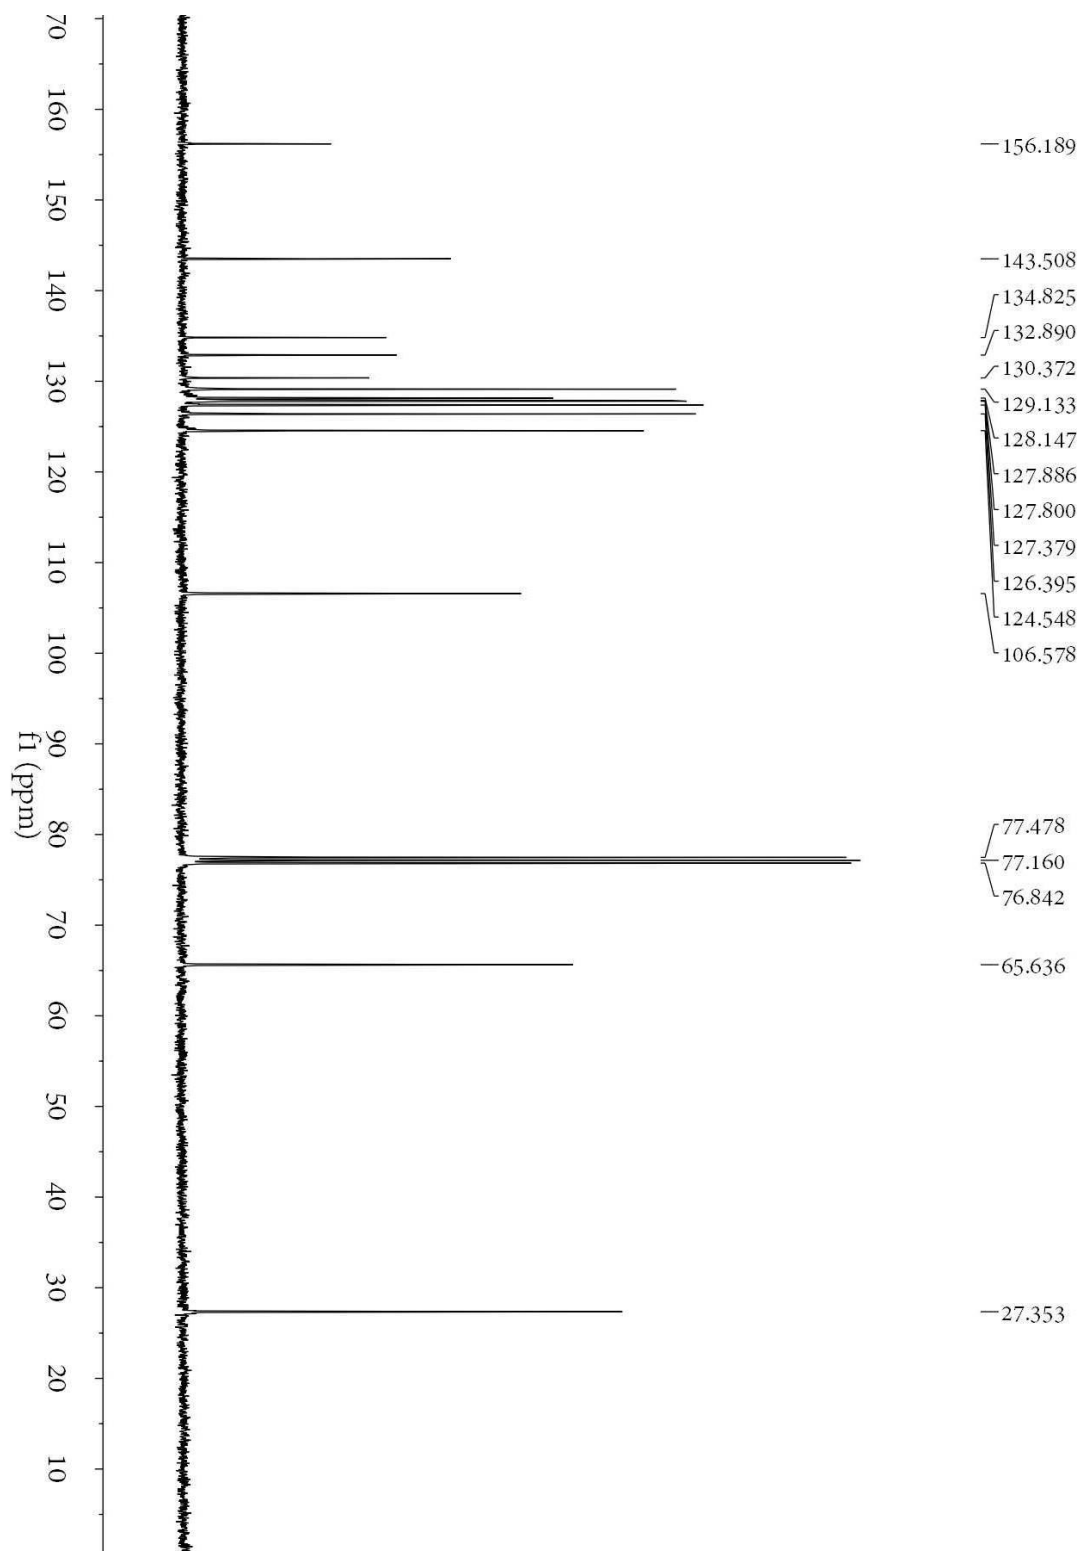

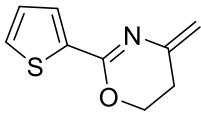

$^1\text{H}$  NMR of **2r**, 81%  
 $\text{CDCl}_3$ , 400 MHz

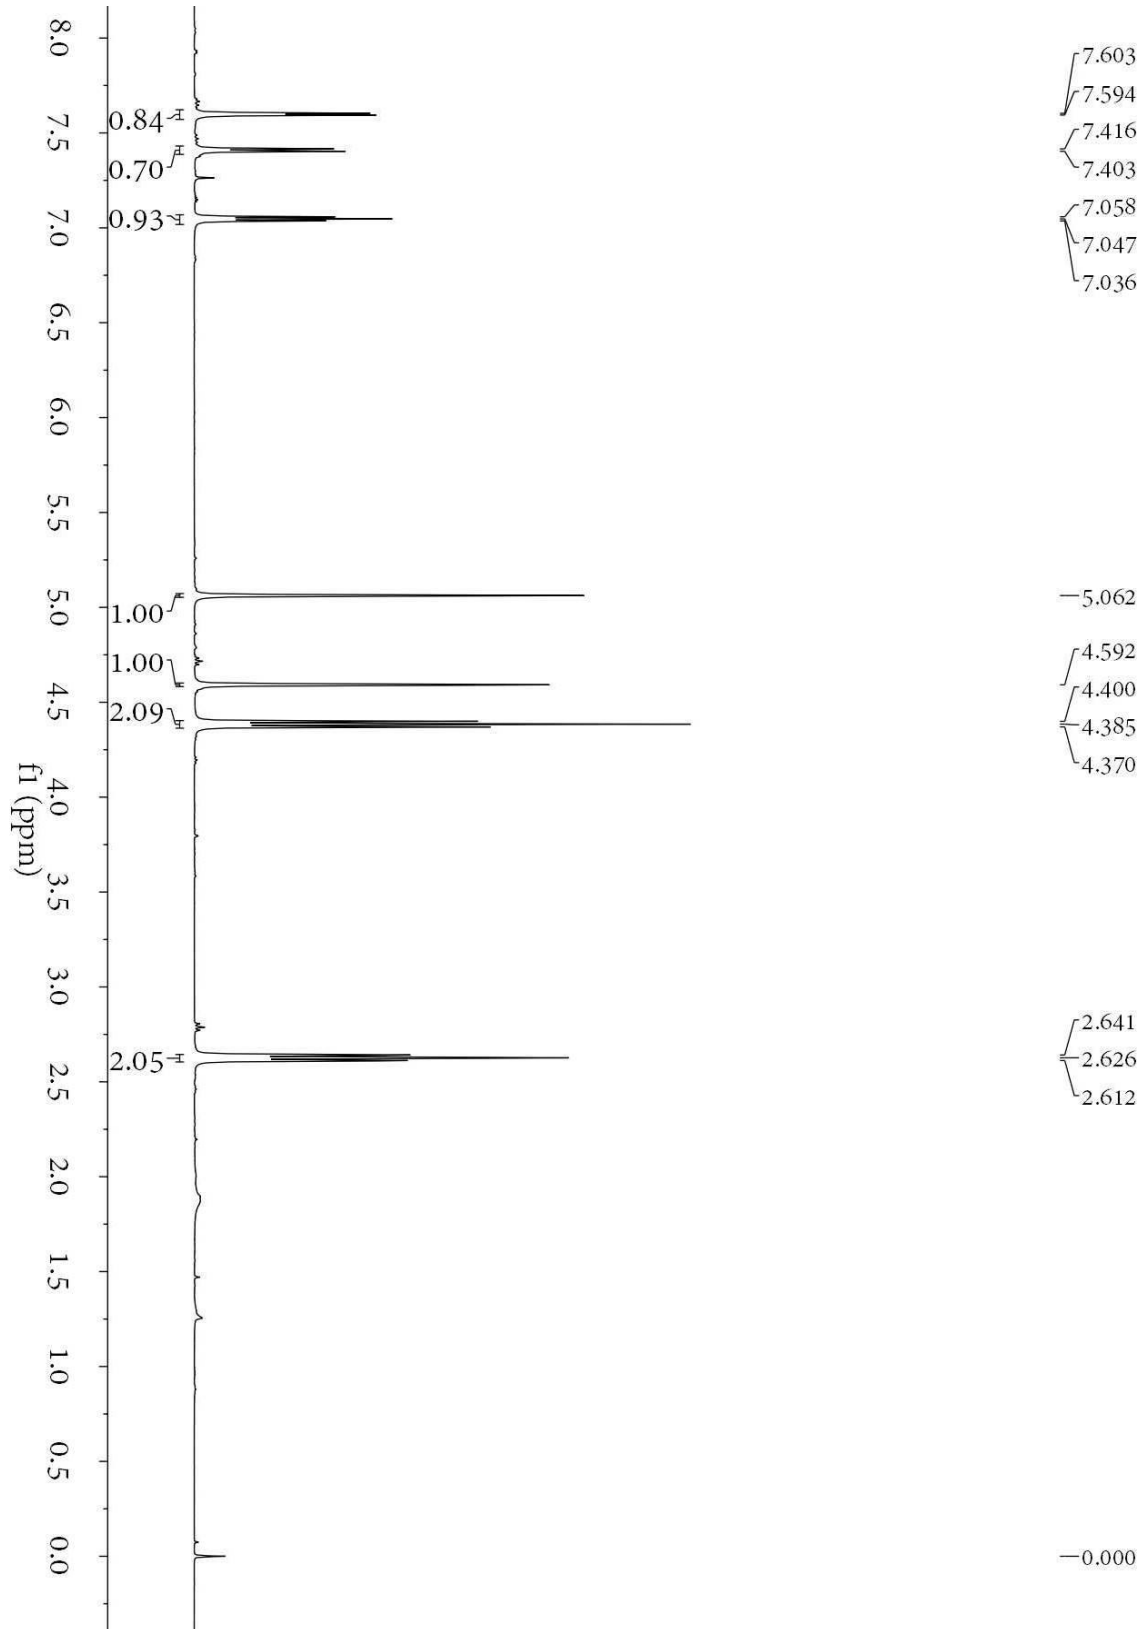

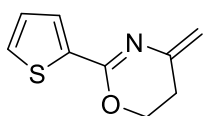

$^{13}\text{C}$  NMR of **2r**, 81%  
 $\text{CDCl}_3$ , 100 MHz

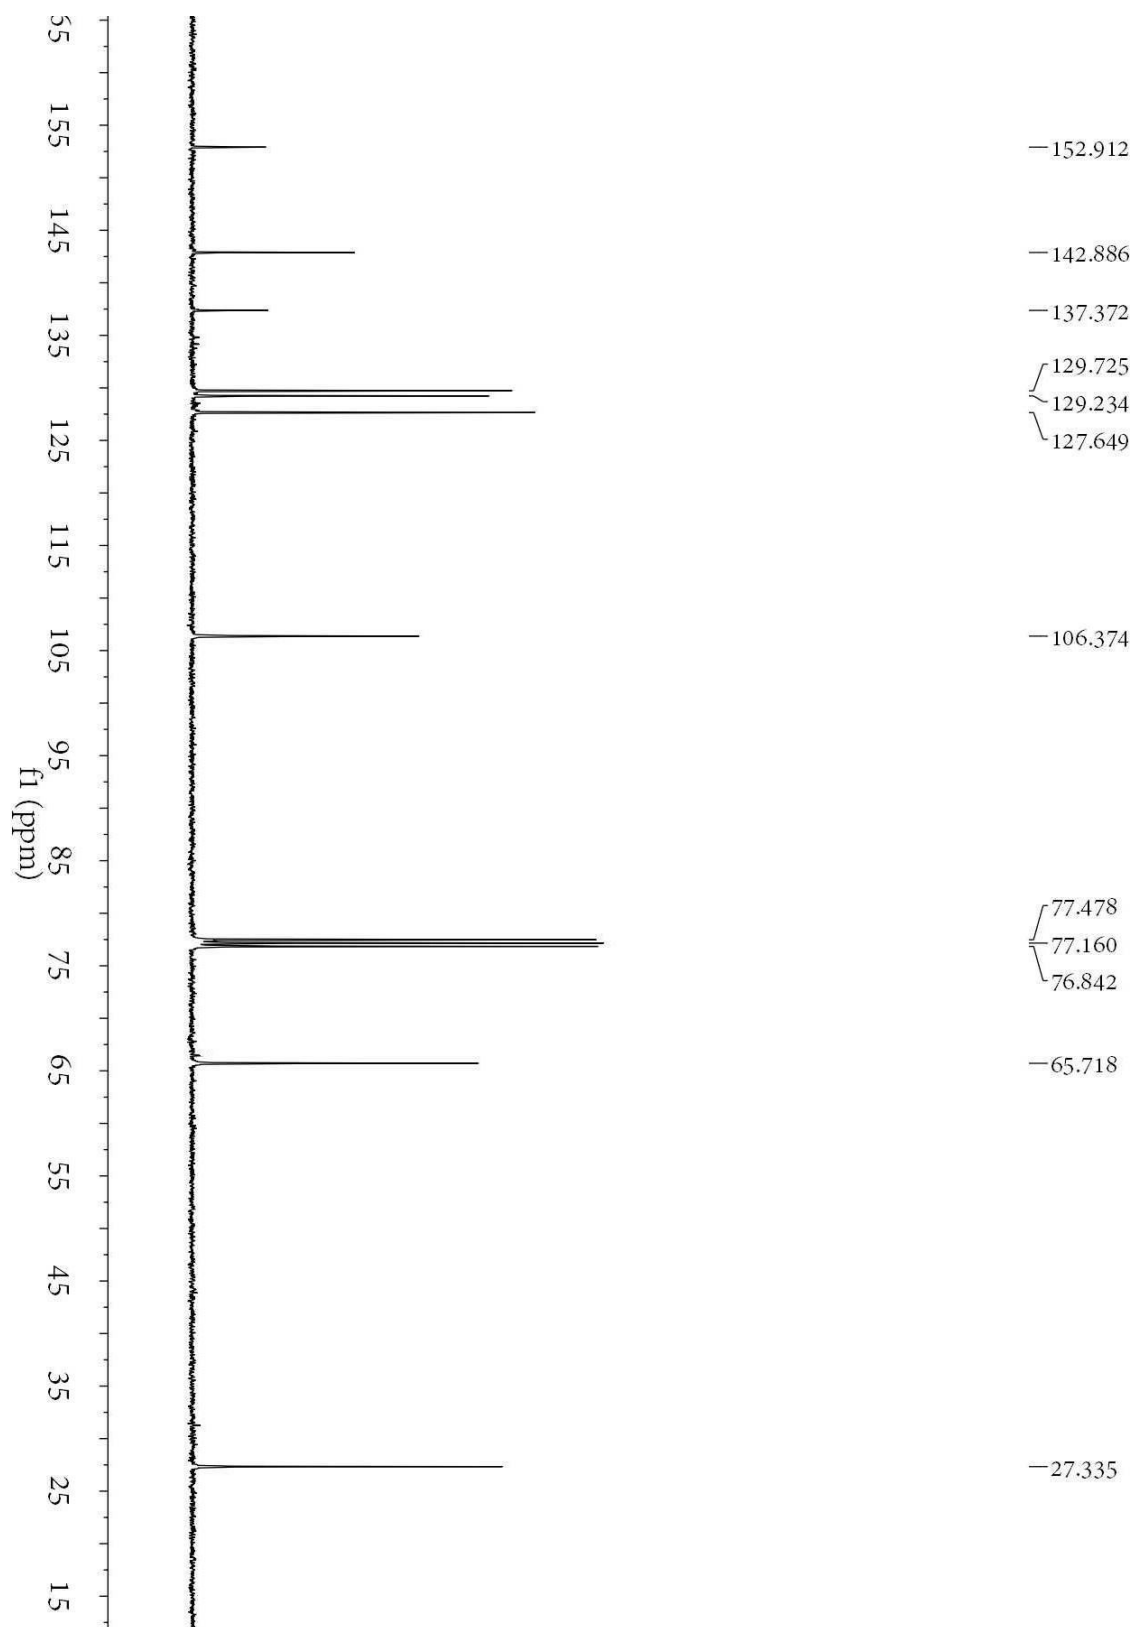

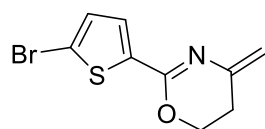

$^1\text{H}$  NMR of **2s**, 63%  
 $\text{CDCl}_3$ , 400 MHz

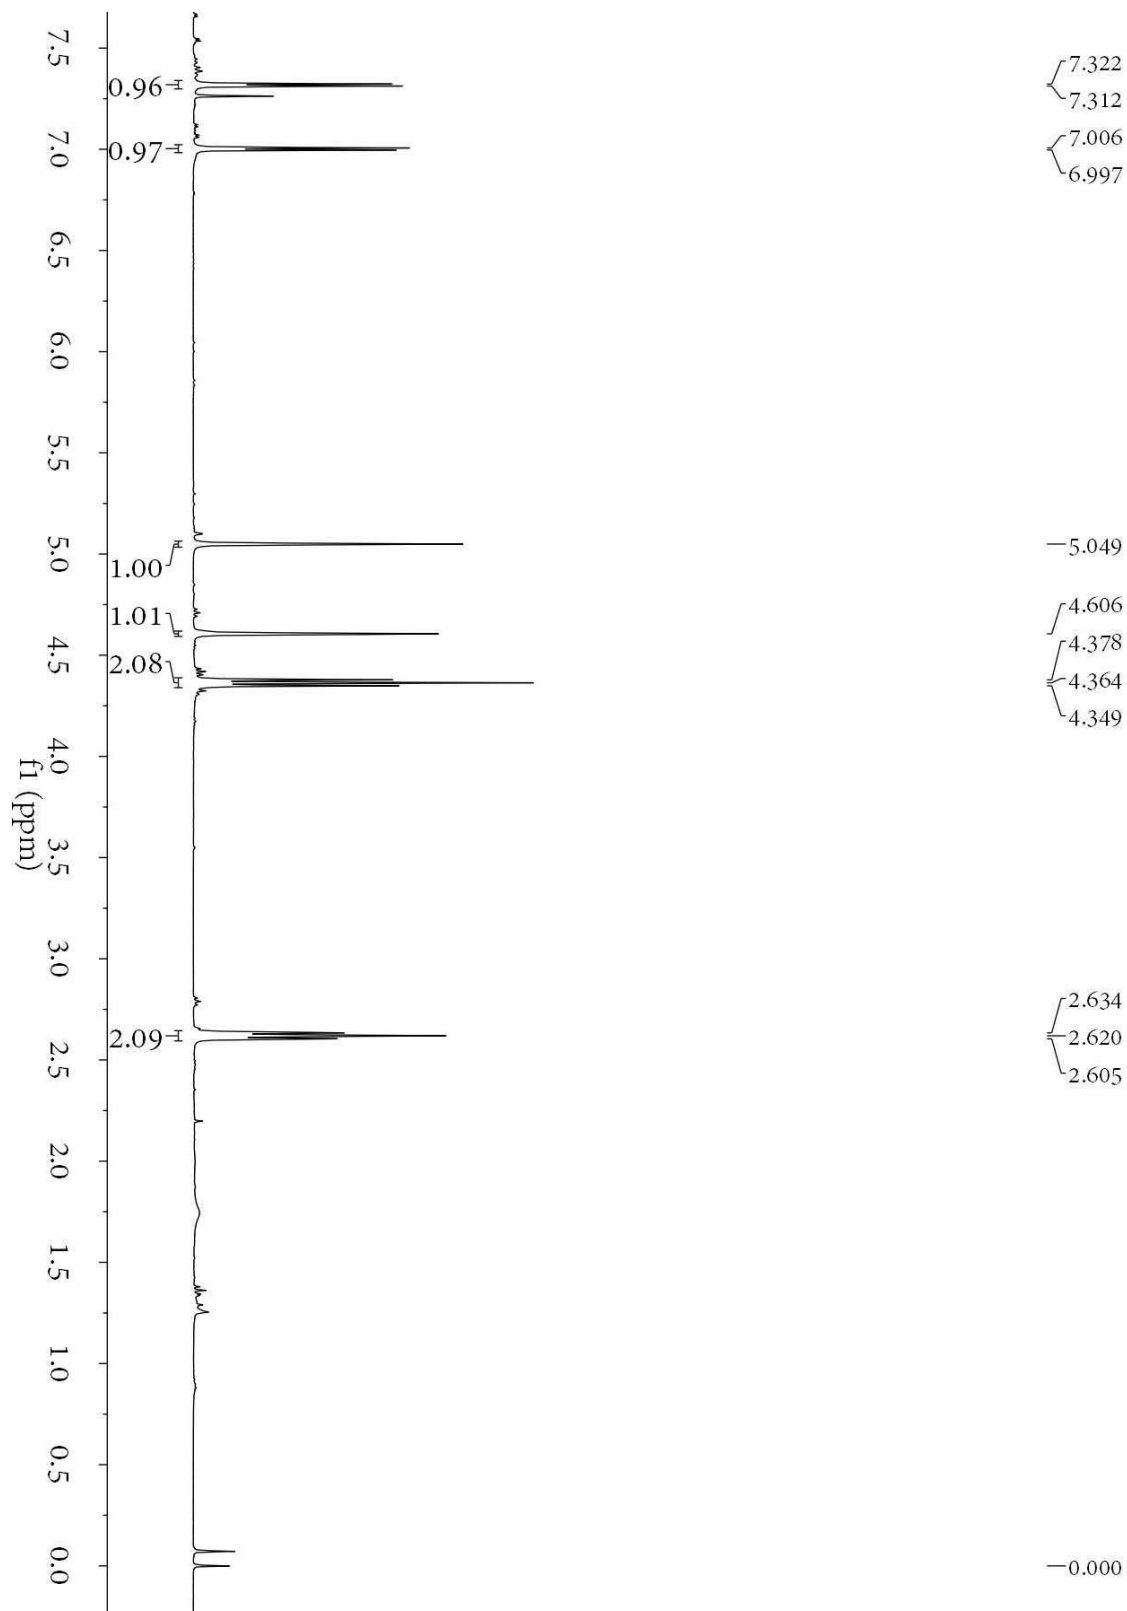



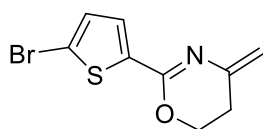

$^{13}\text{C}$  NMR of **2s**, 63%  
 $\text{CDCl}_3$ , 100 MHz

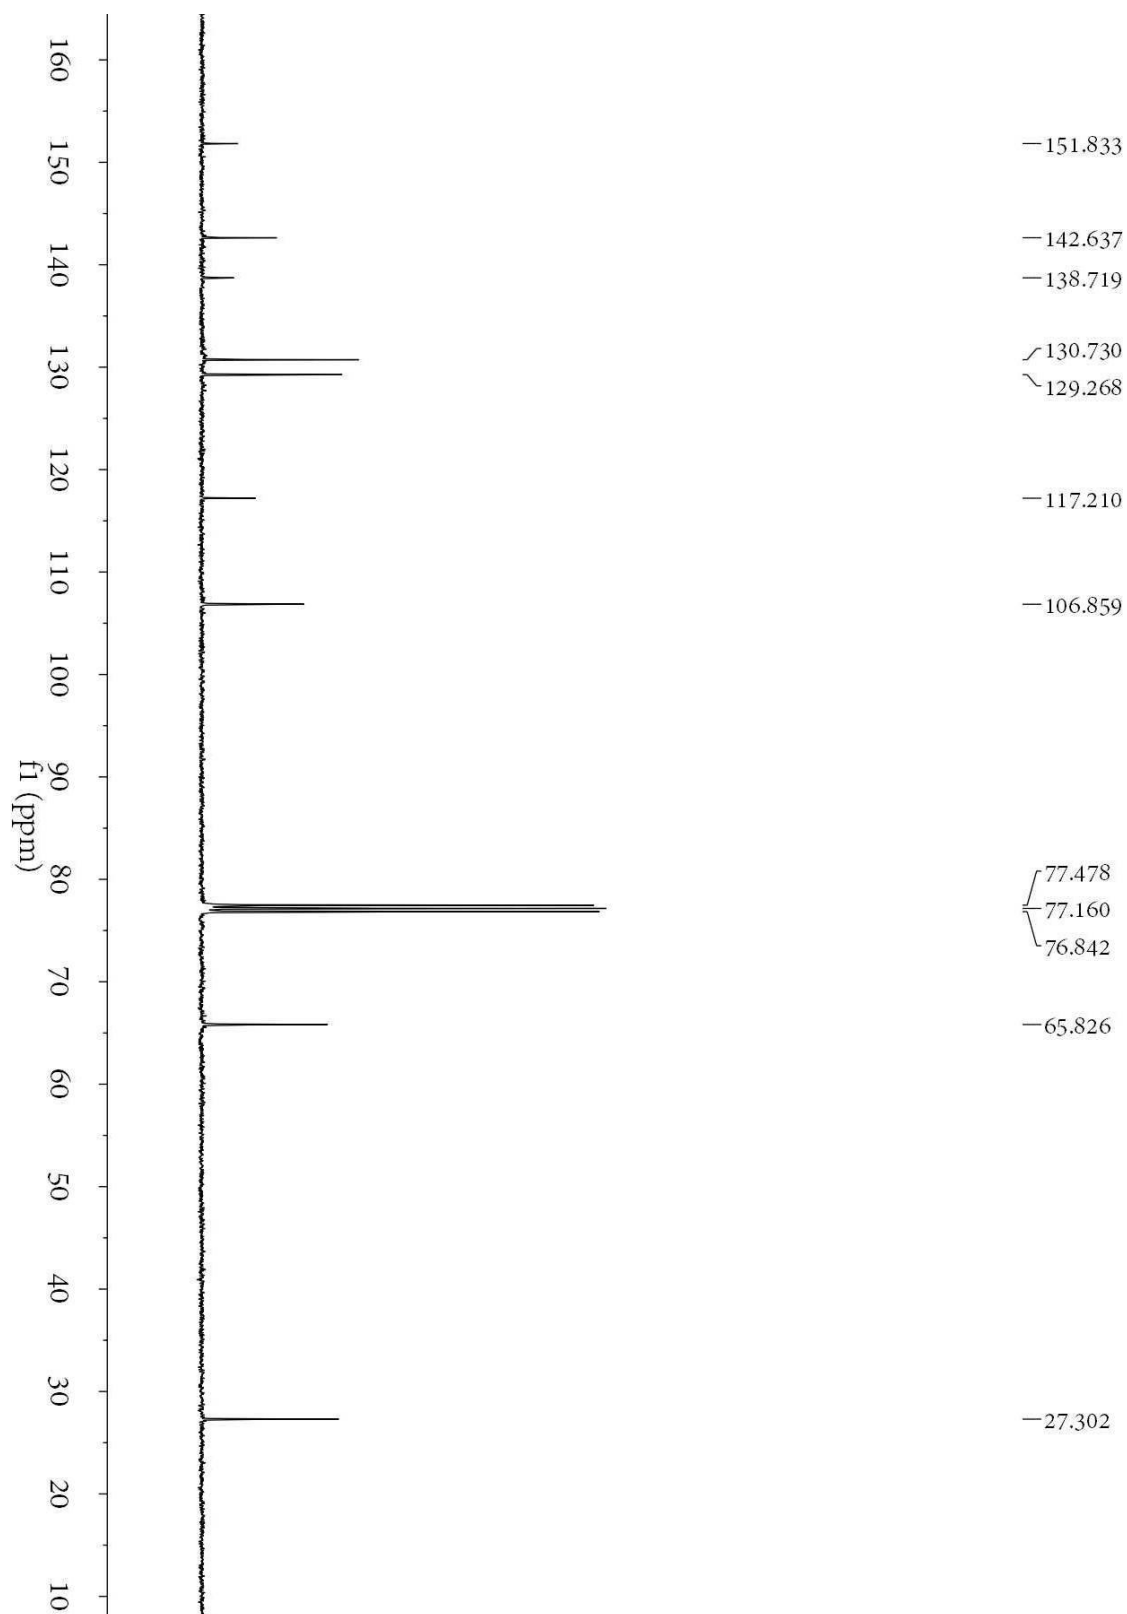

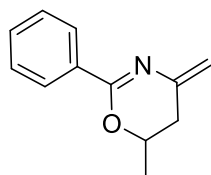

$^1\text{H}$  NMR of **2t**, 85%  
 $\text{CDCl}_3$ , 400 MHz

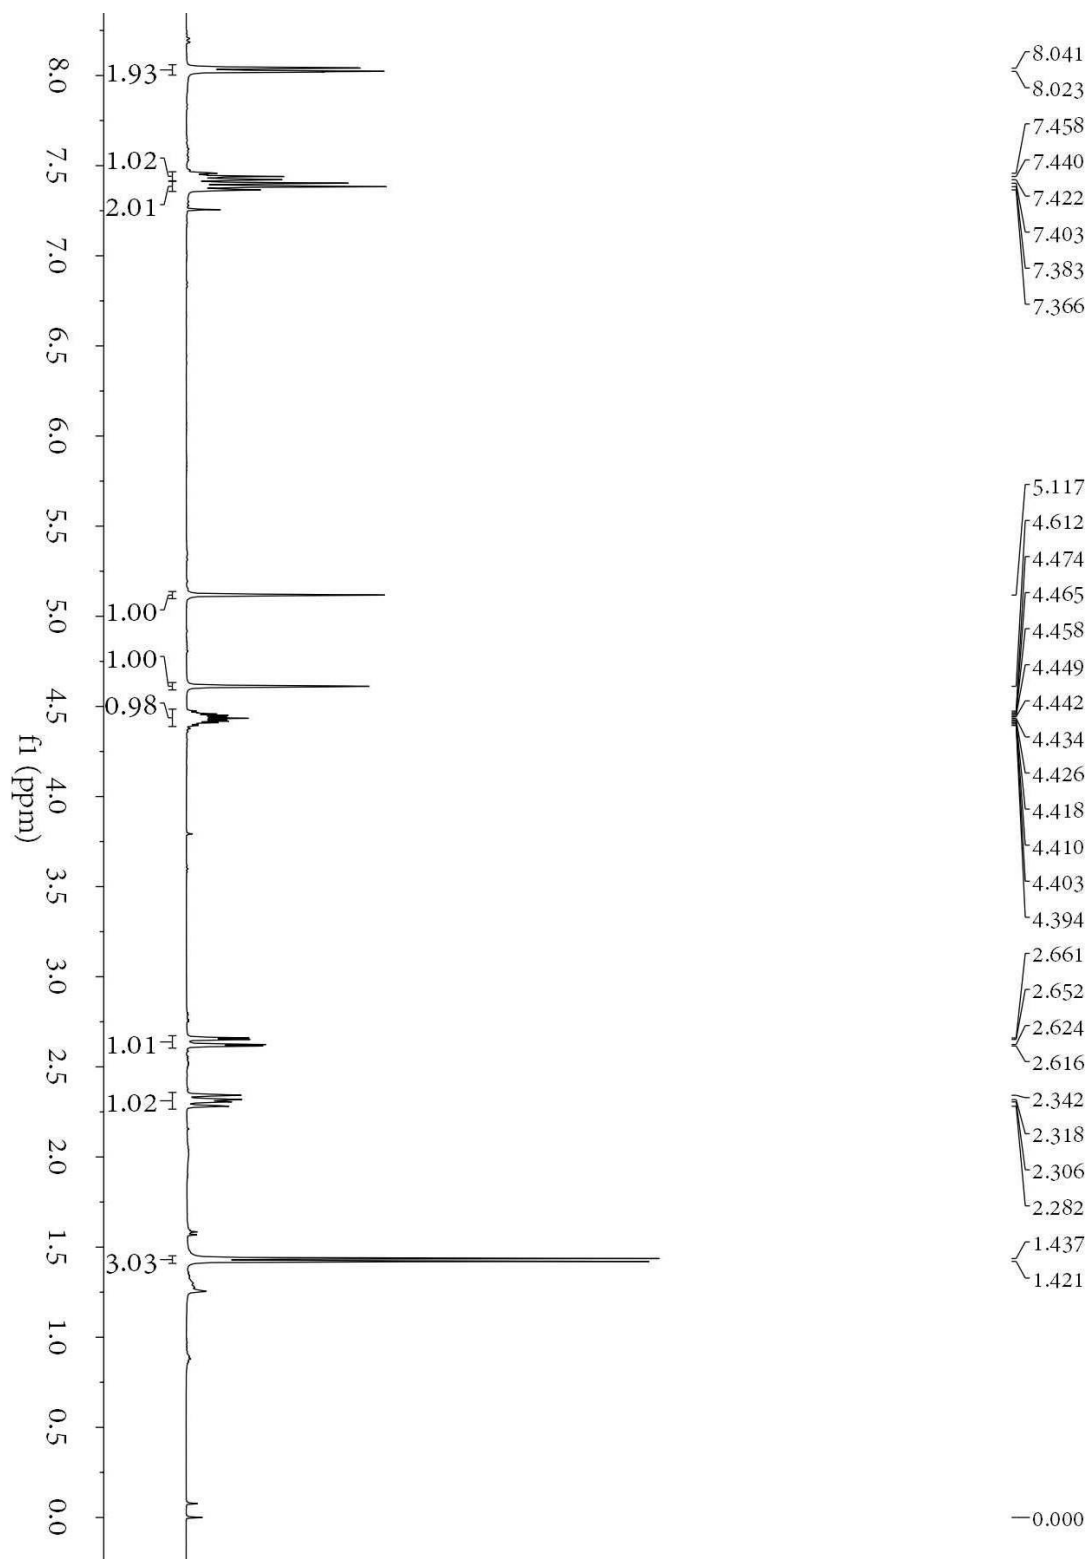

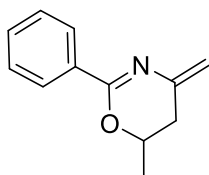

$^{13}\text{C}$  NMR of **2t**, 85%  
 $\text{CDCl}_3$ , 100 MHz

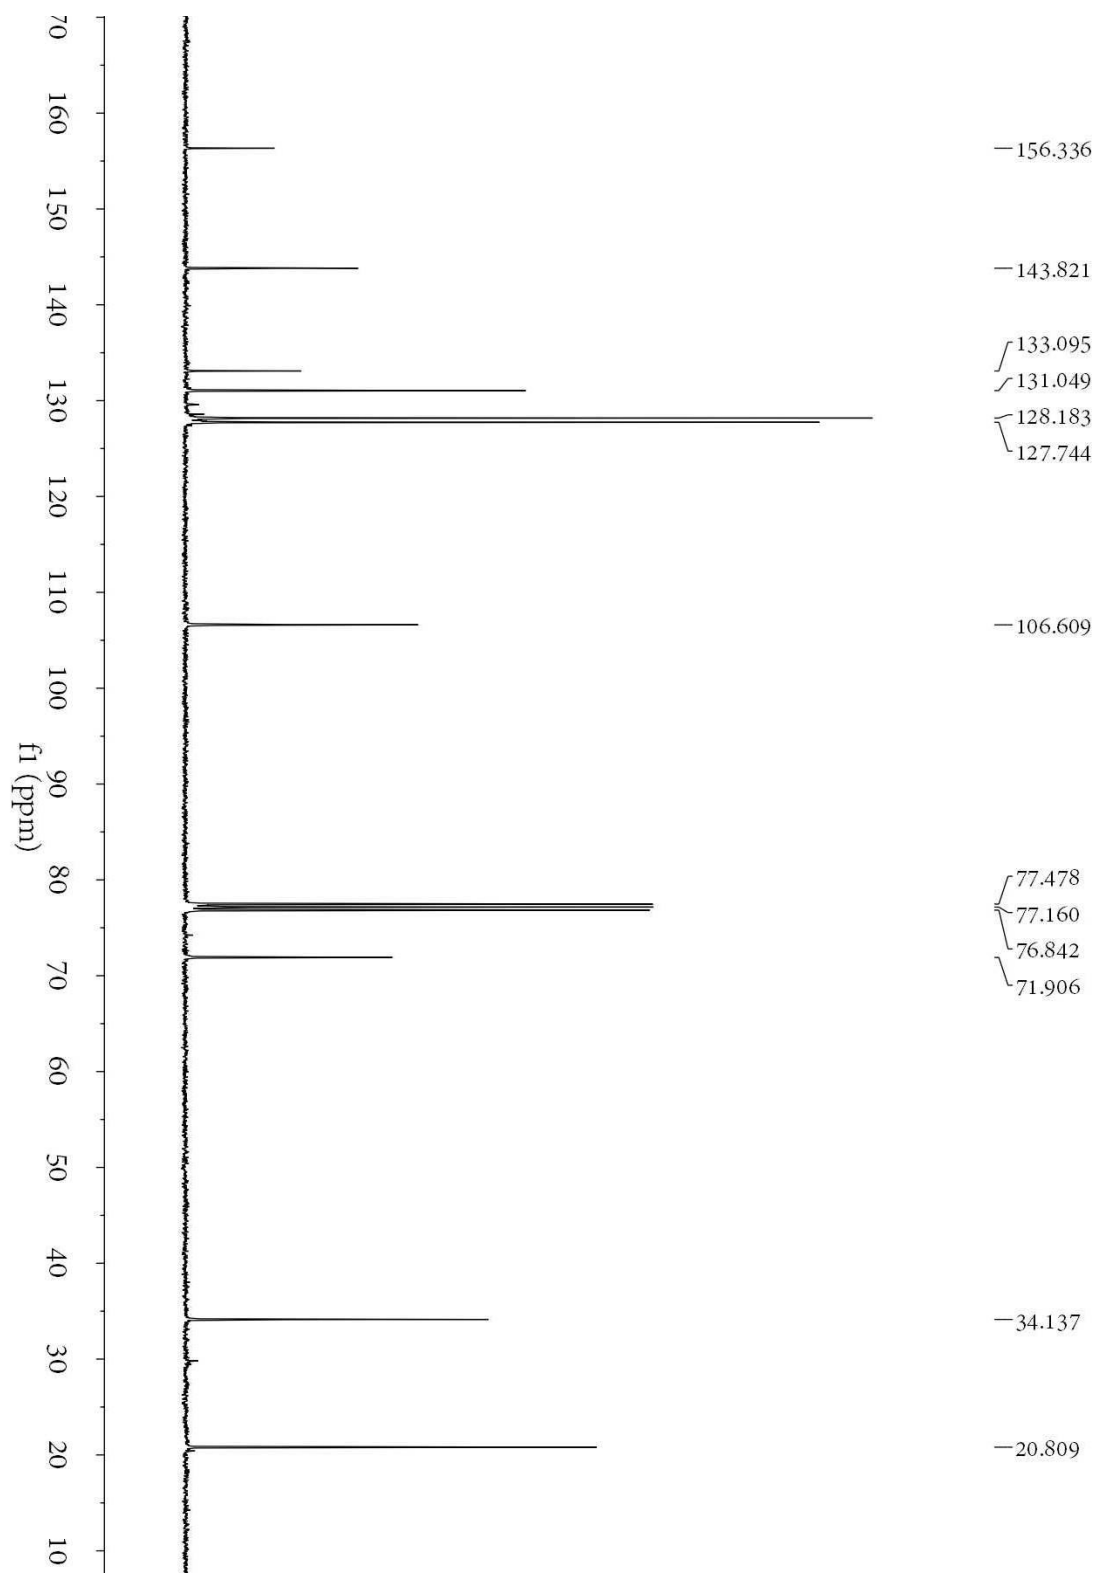

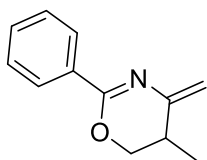

$^1\text{H}$  NMR of **2u**, 81%  
 $\text{CDCl}_3$ , 400 MHz

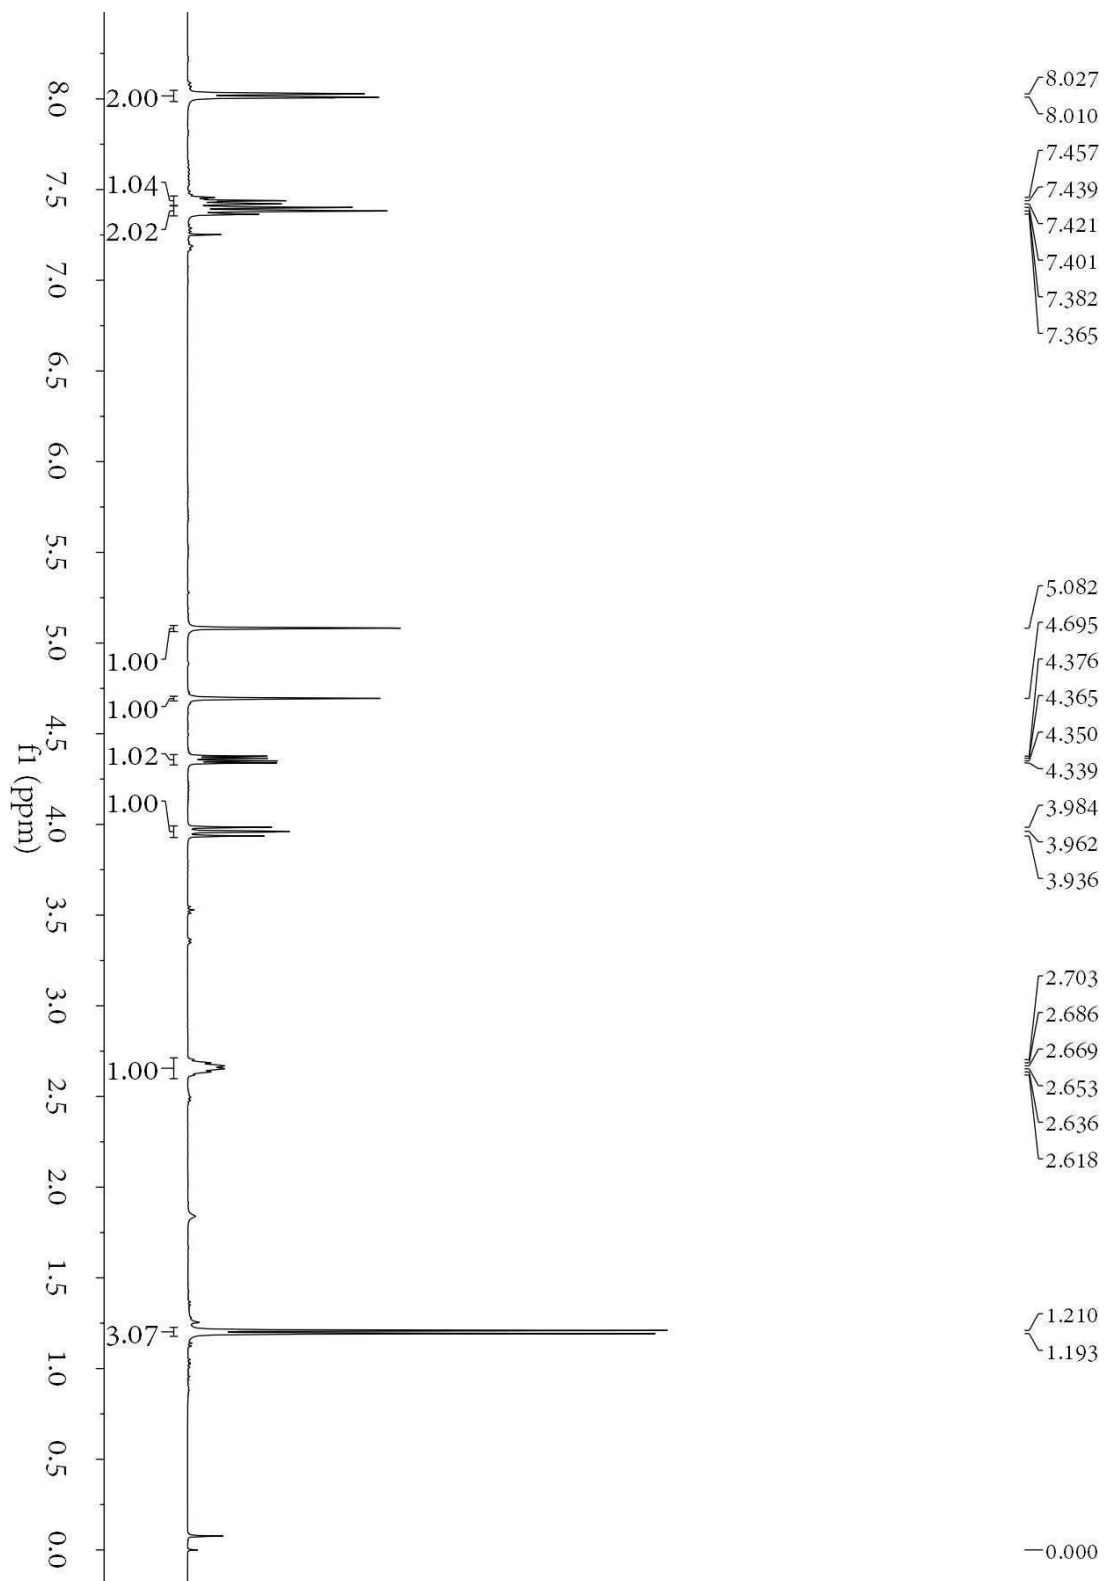

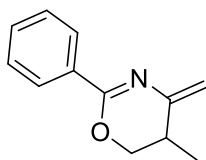

$^{13}\text{C}$  NMR of **2u**, 81%  
 $\text{CDCl}_3$ , 100 MHz

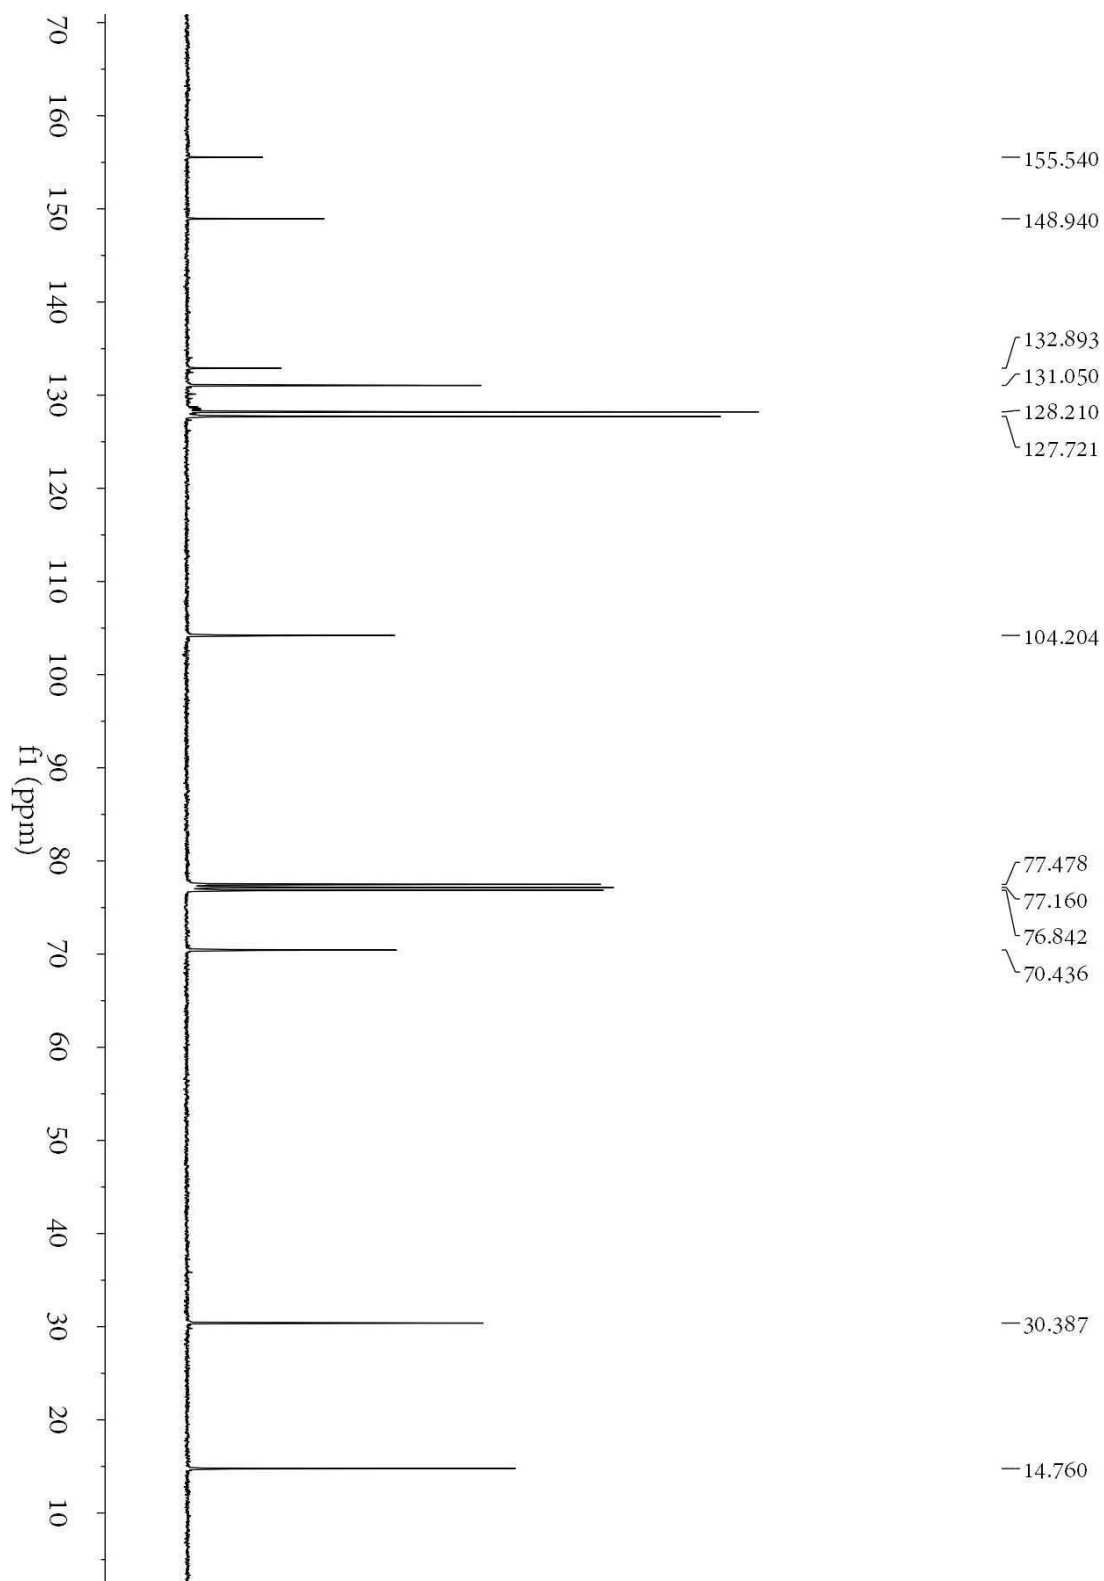

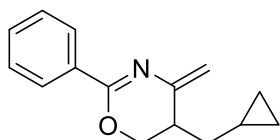

$^1\text{H}$  NMR of **2v**, 72%  
 $\text{CDCl}_3$ , 400 MHz

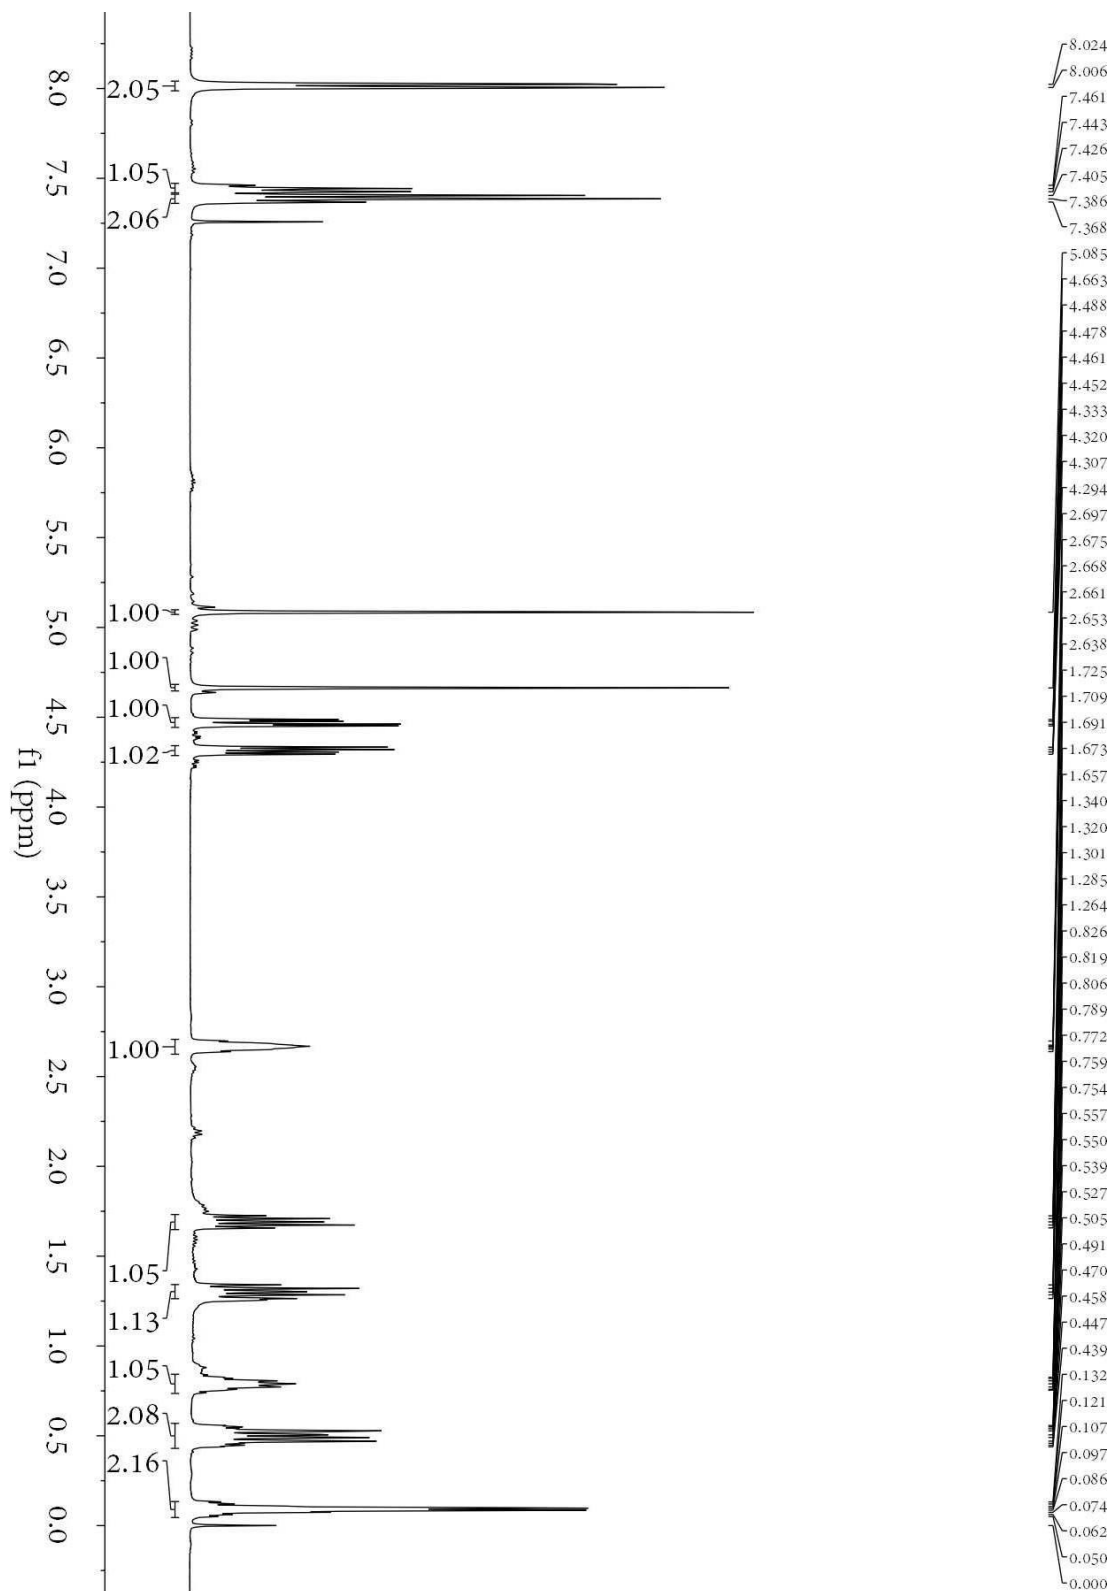

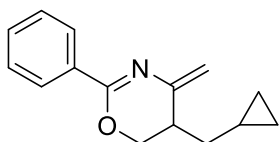

$^{13}\text{C}$  NMR of **2v**, 72%  
 $\text{CDCl}_3$ , 100 MHz

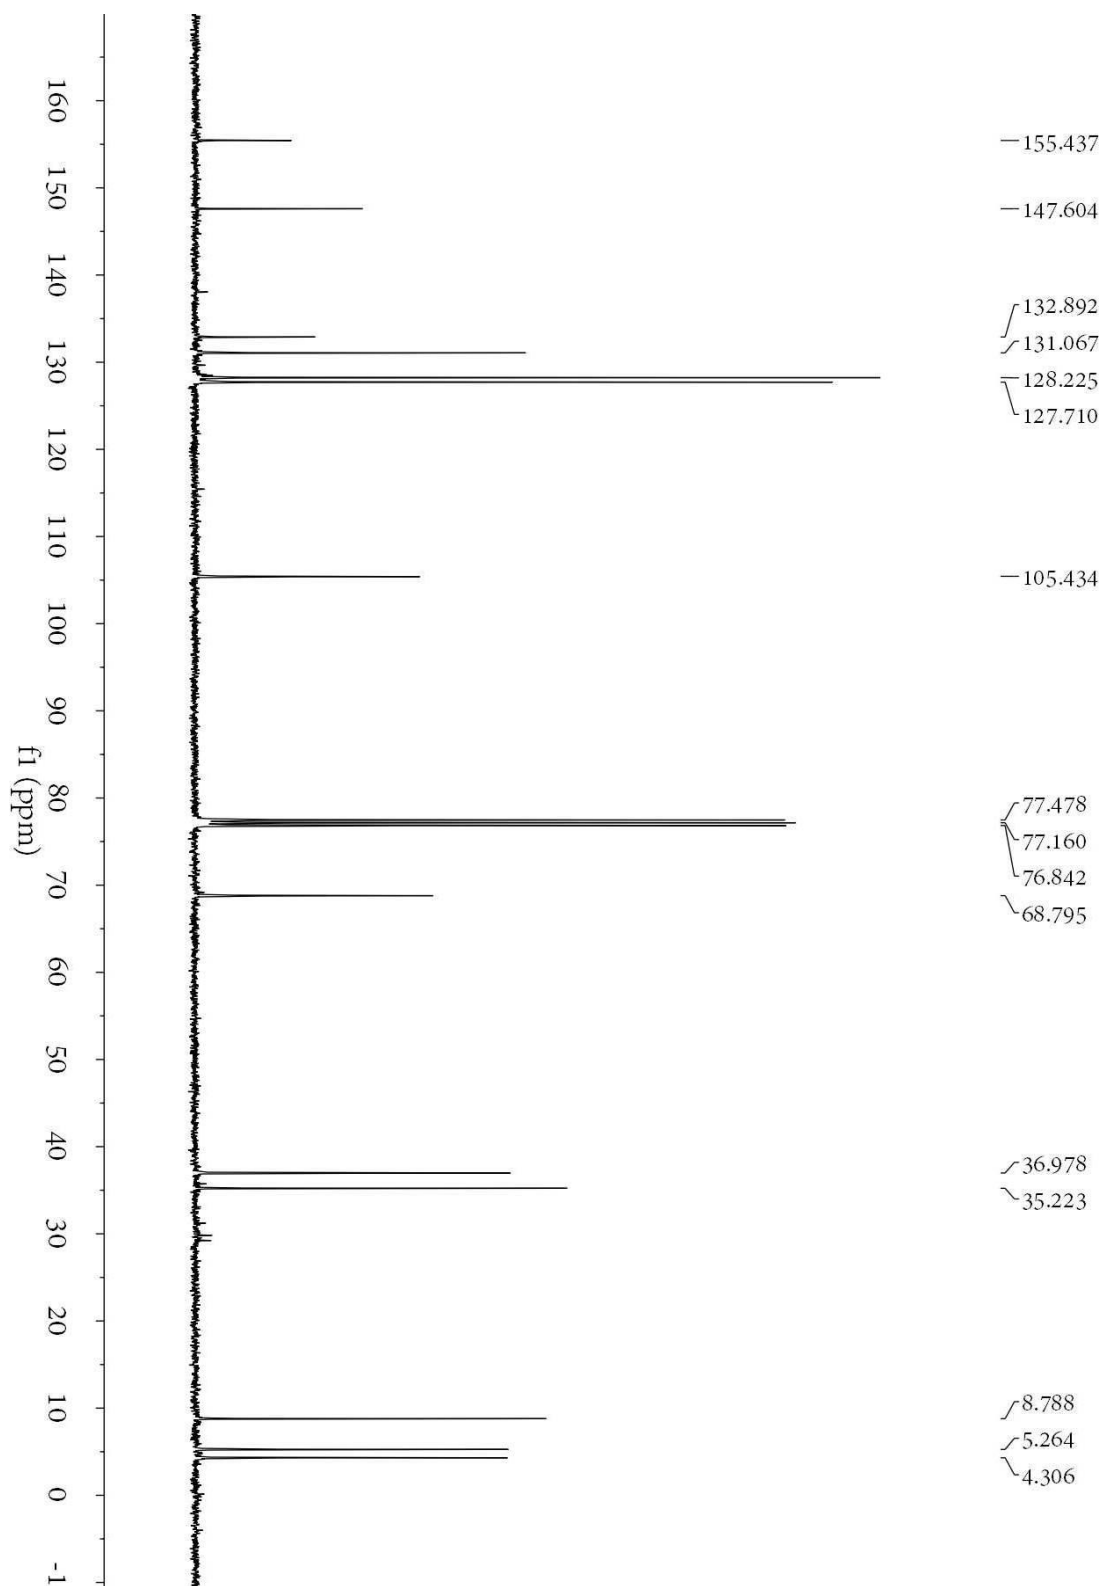

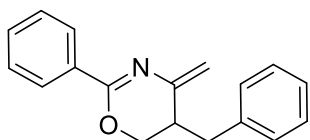

$^1\text{H}$  NMR of **2w**, 83%  
 $\text{CDCl}_3$ , 400 MHz

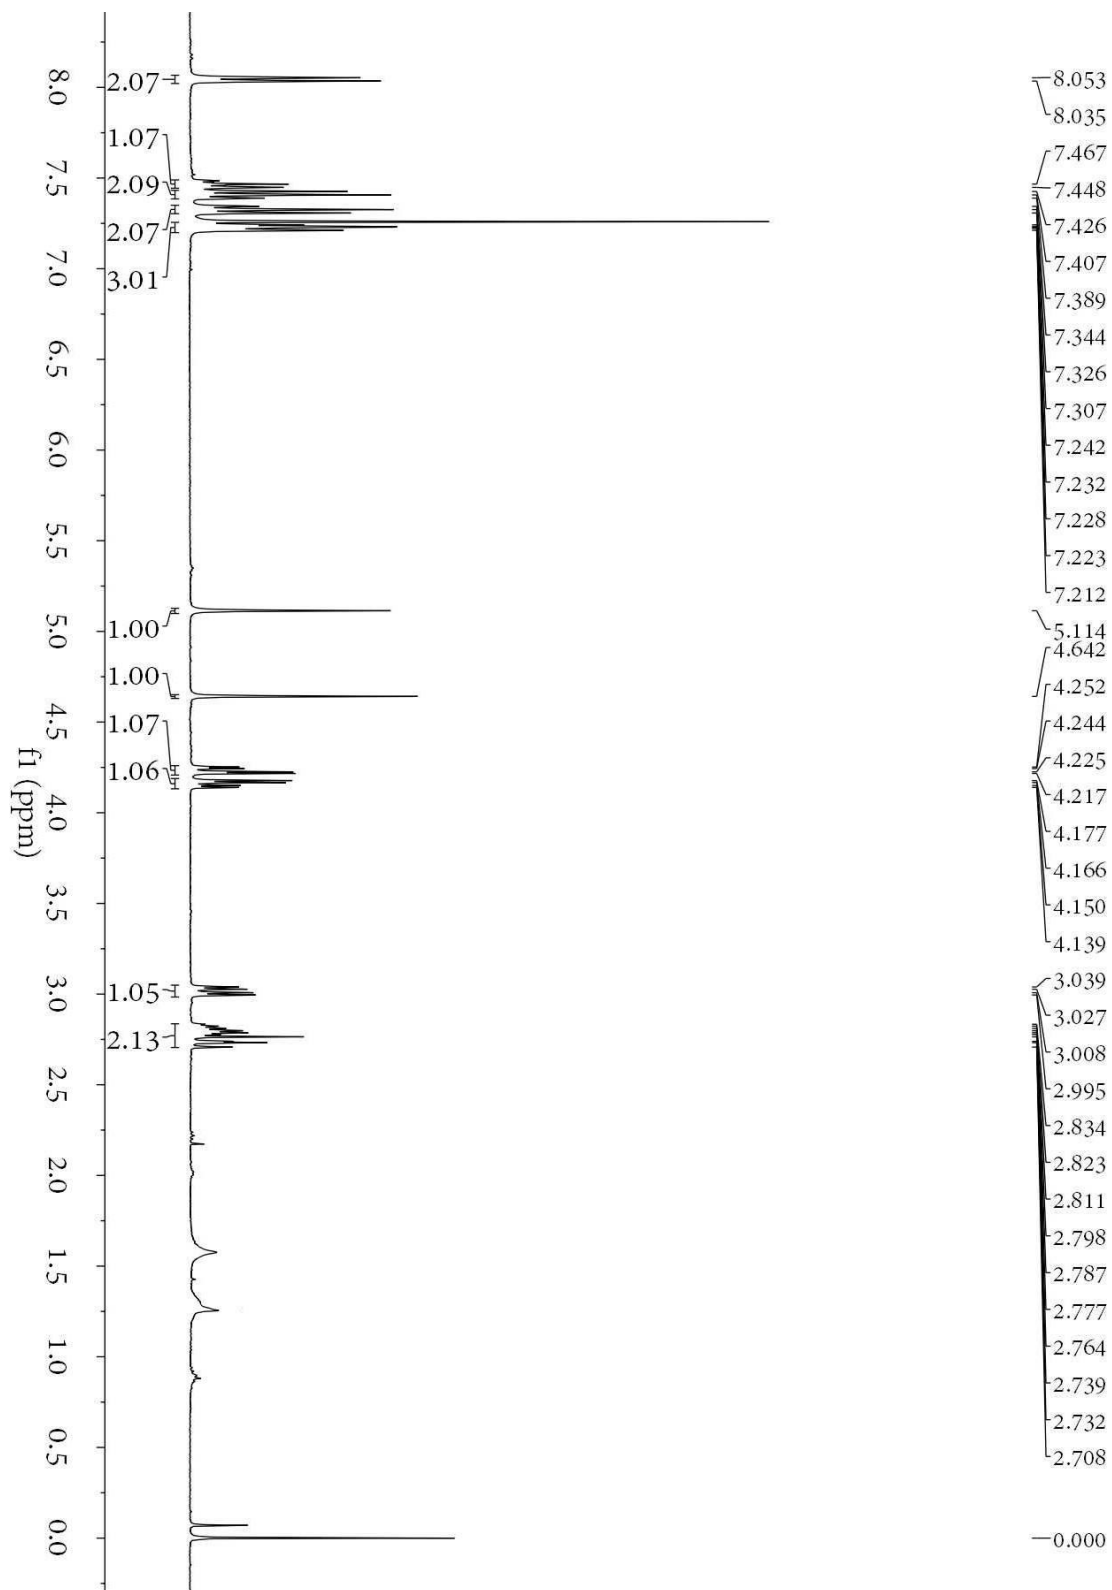



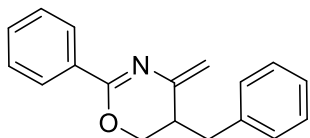

$^{13}\text{C}$  NMR of **2w**, 83%

$\text{CDCl}_3$ , 100 MHz

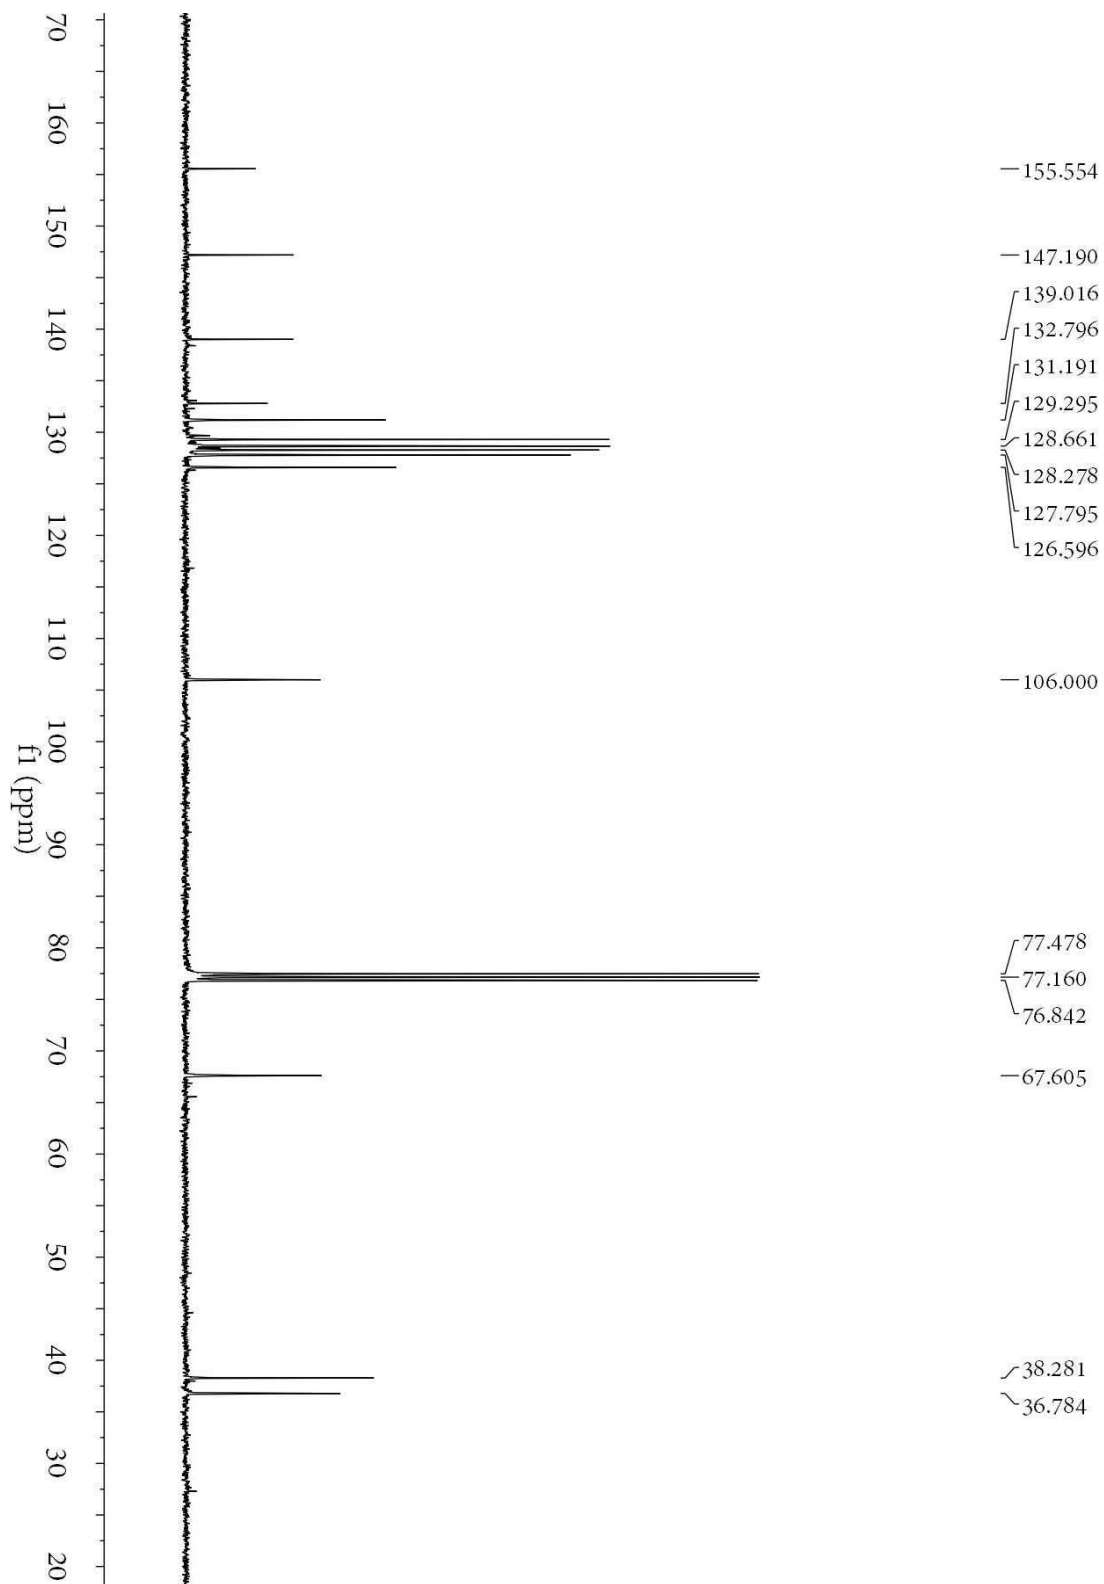

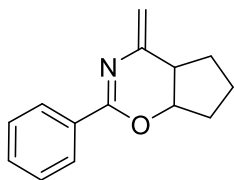

$^1\text{H}$  NMR of **2x**, 83%

$\text{CDCl}_3$ , 400 MHz

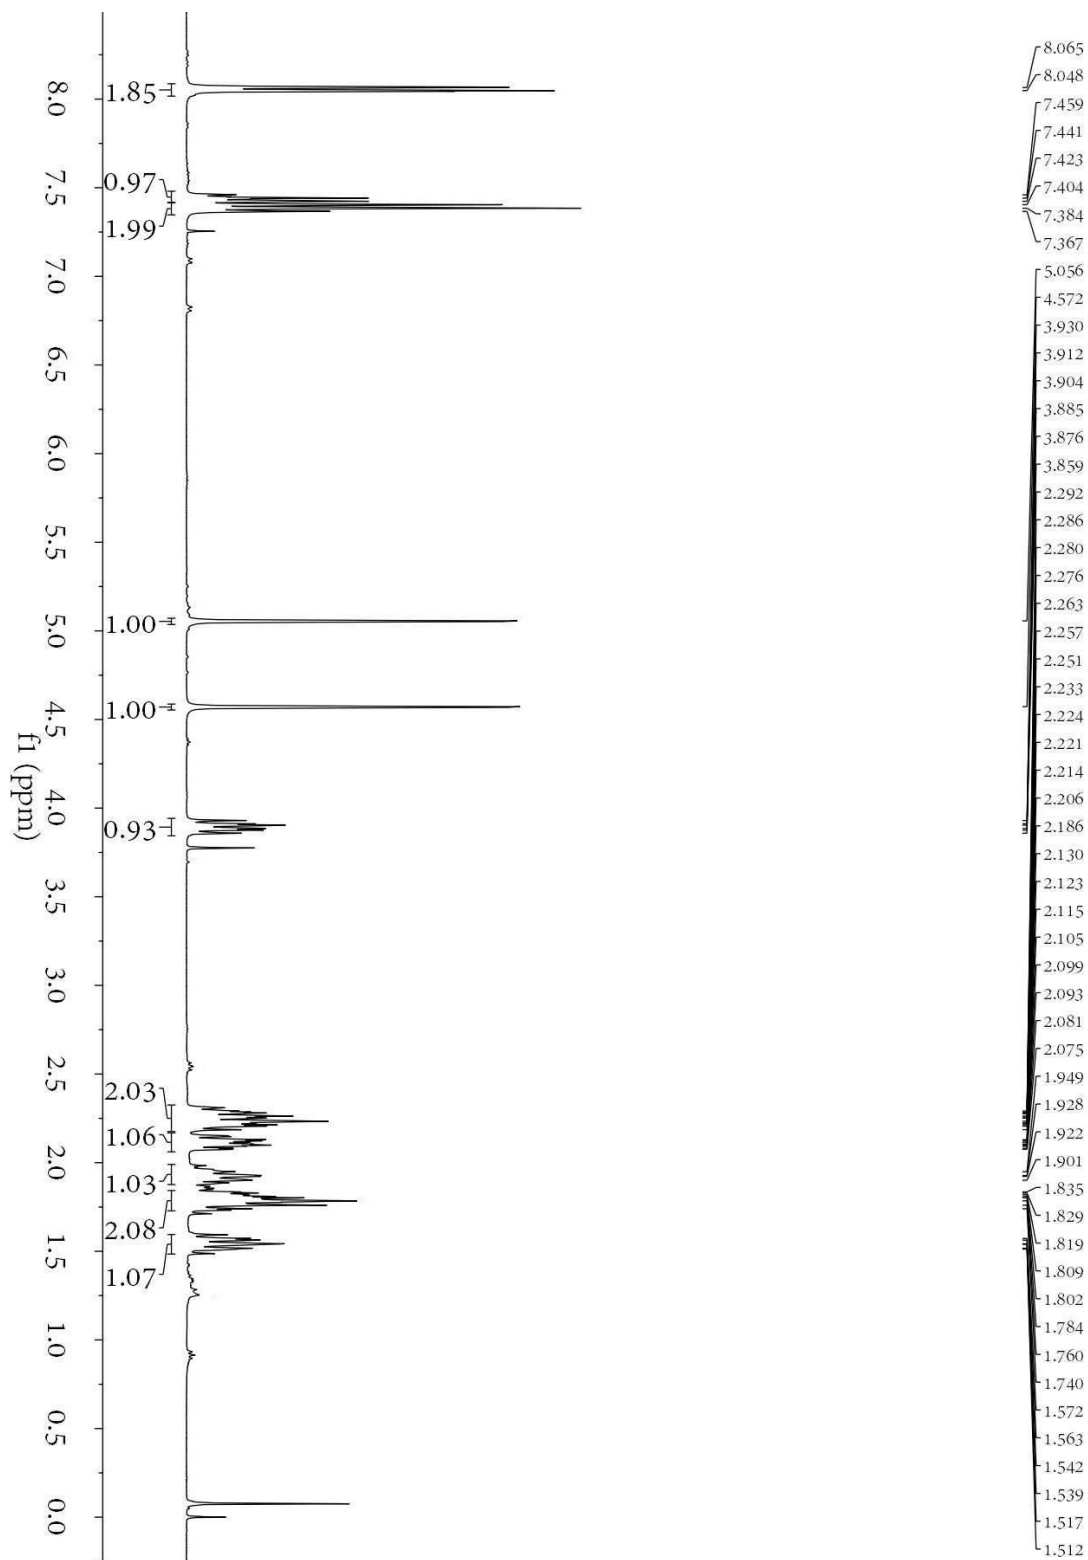

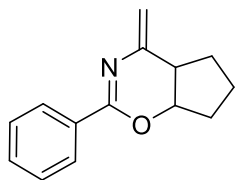

$^{13}\text{C}$  NMR of **2x**, 83%

$\text{CDCl}_3$ , 100 MHz

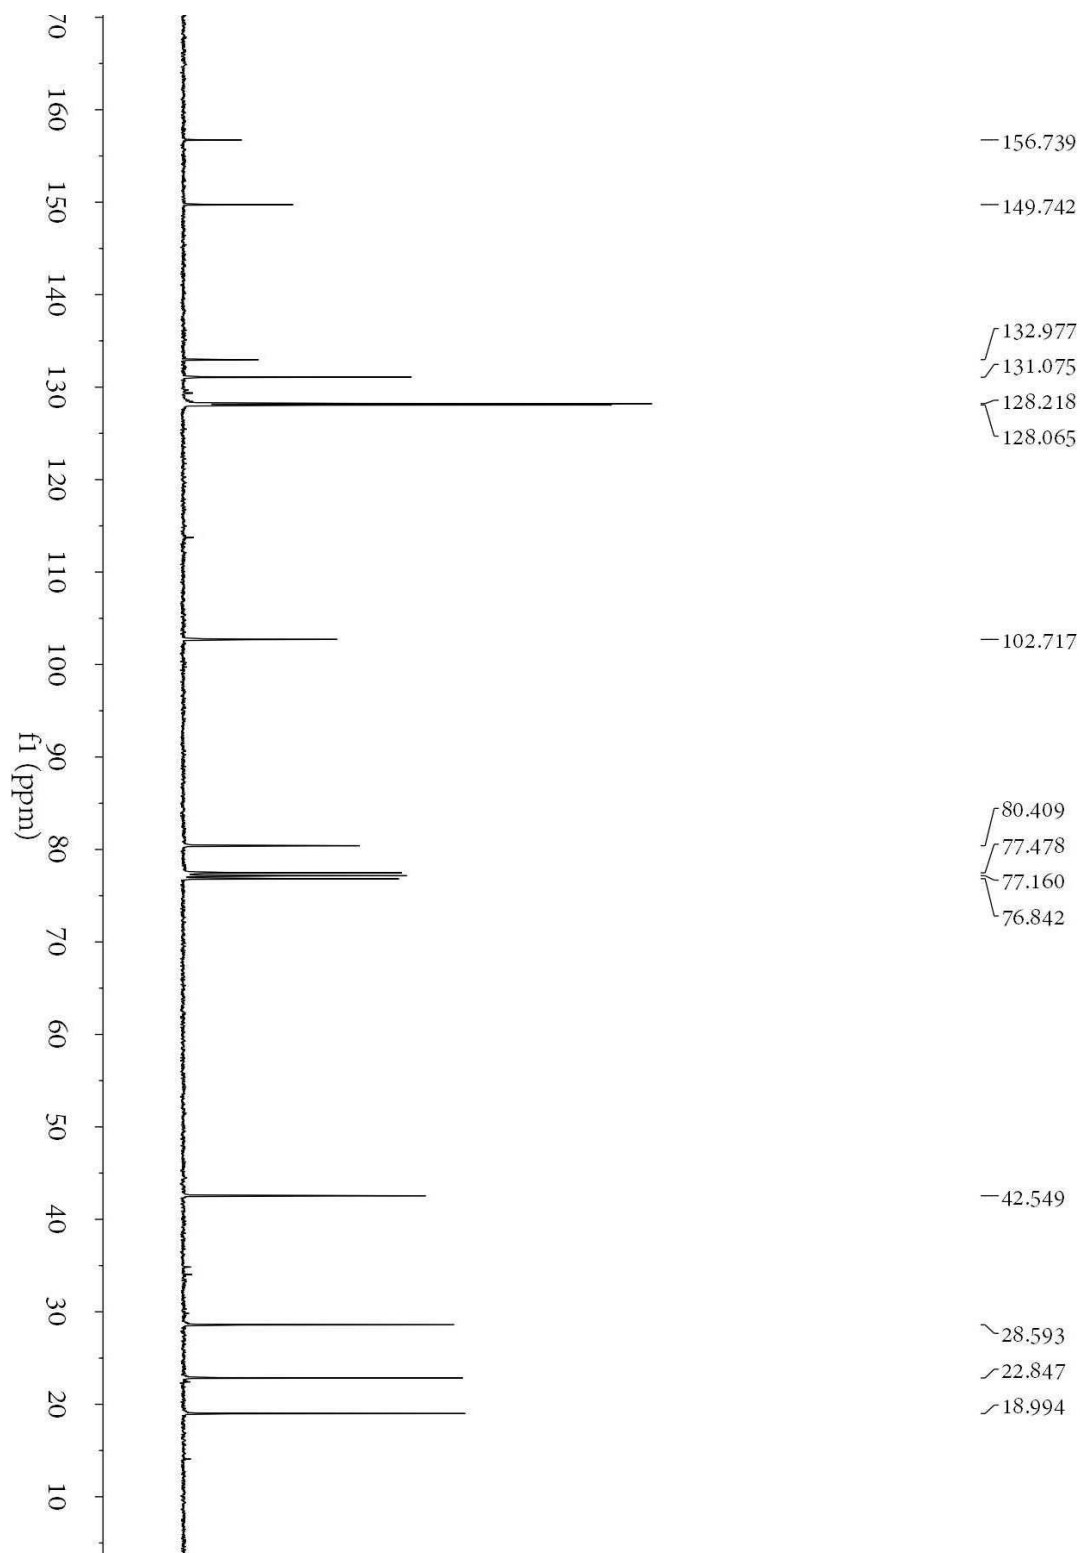

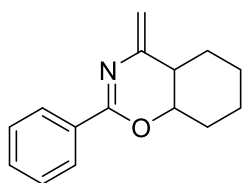

$^1\text{H}$  NMR of **2y**, 76%  
 $\text{CDCl}_3$ , 400 MHz

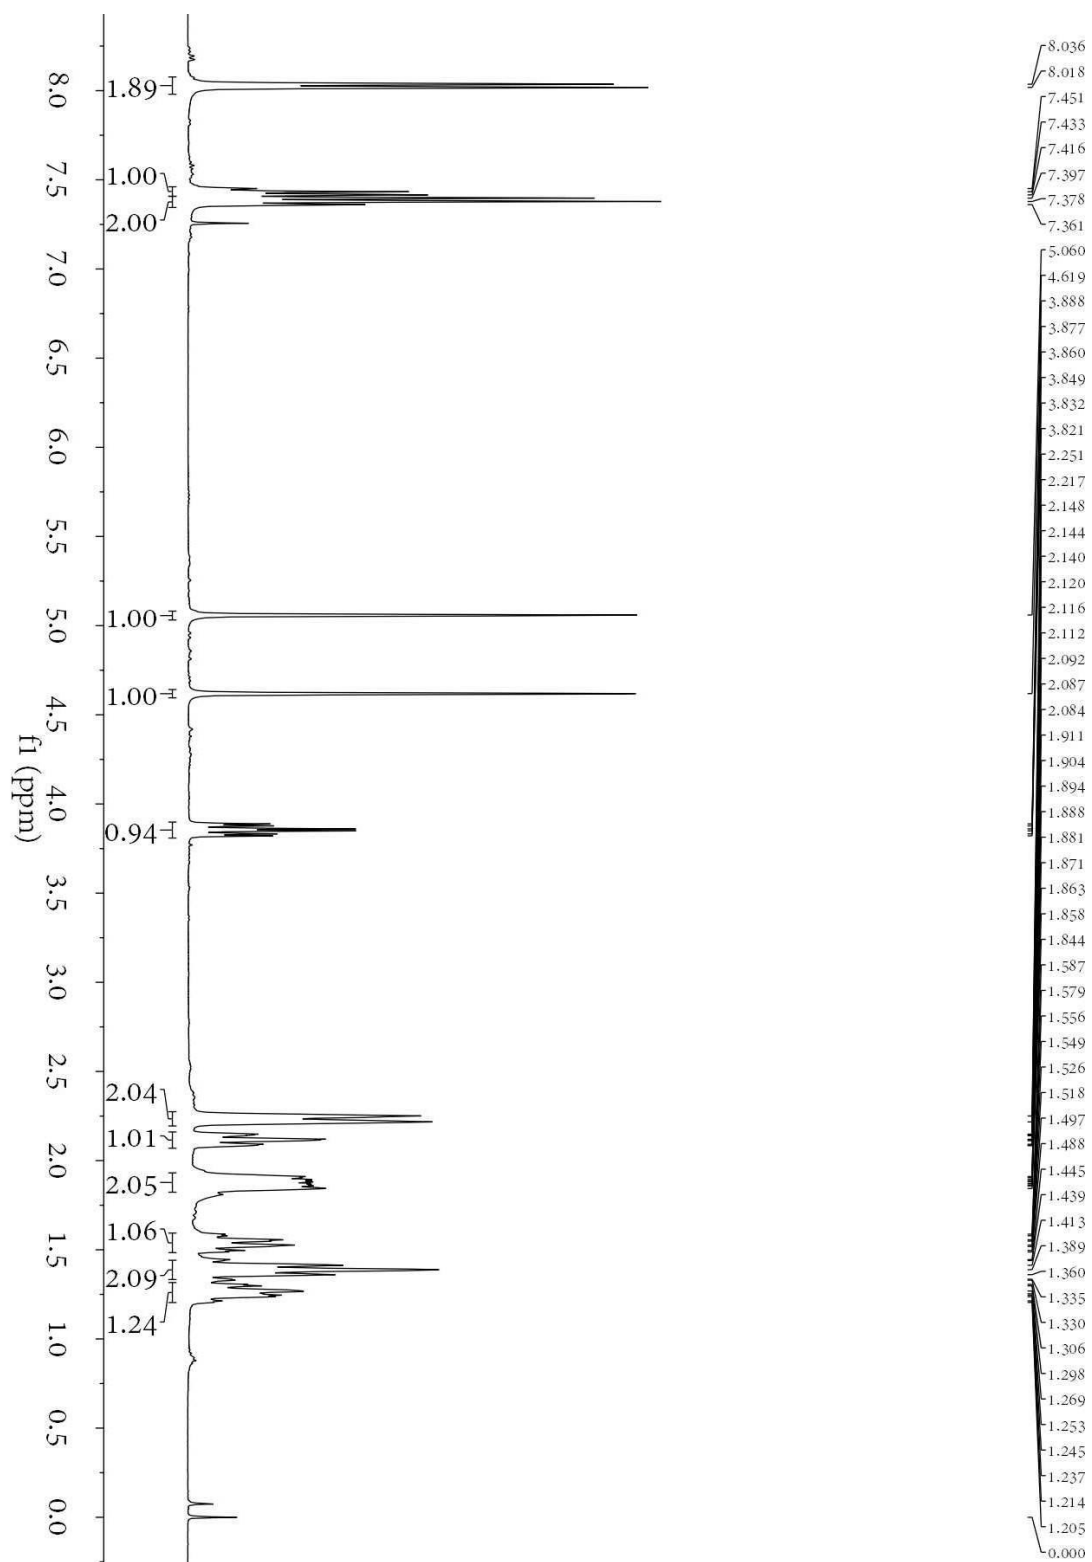

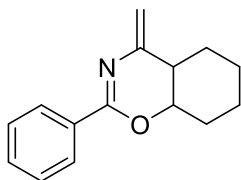

$^{13}\text{C}$  NMR of **2y**, 76%  
 $\text{CDCl}_3$ , 100 MHz

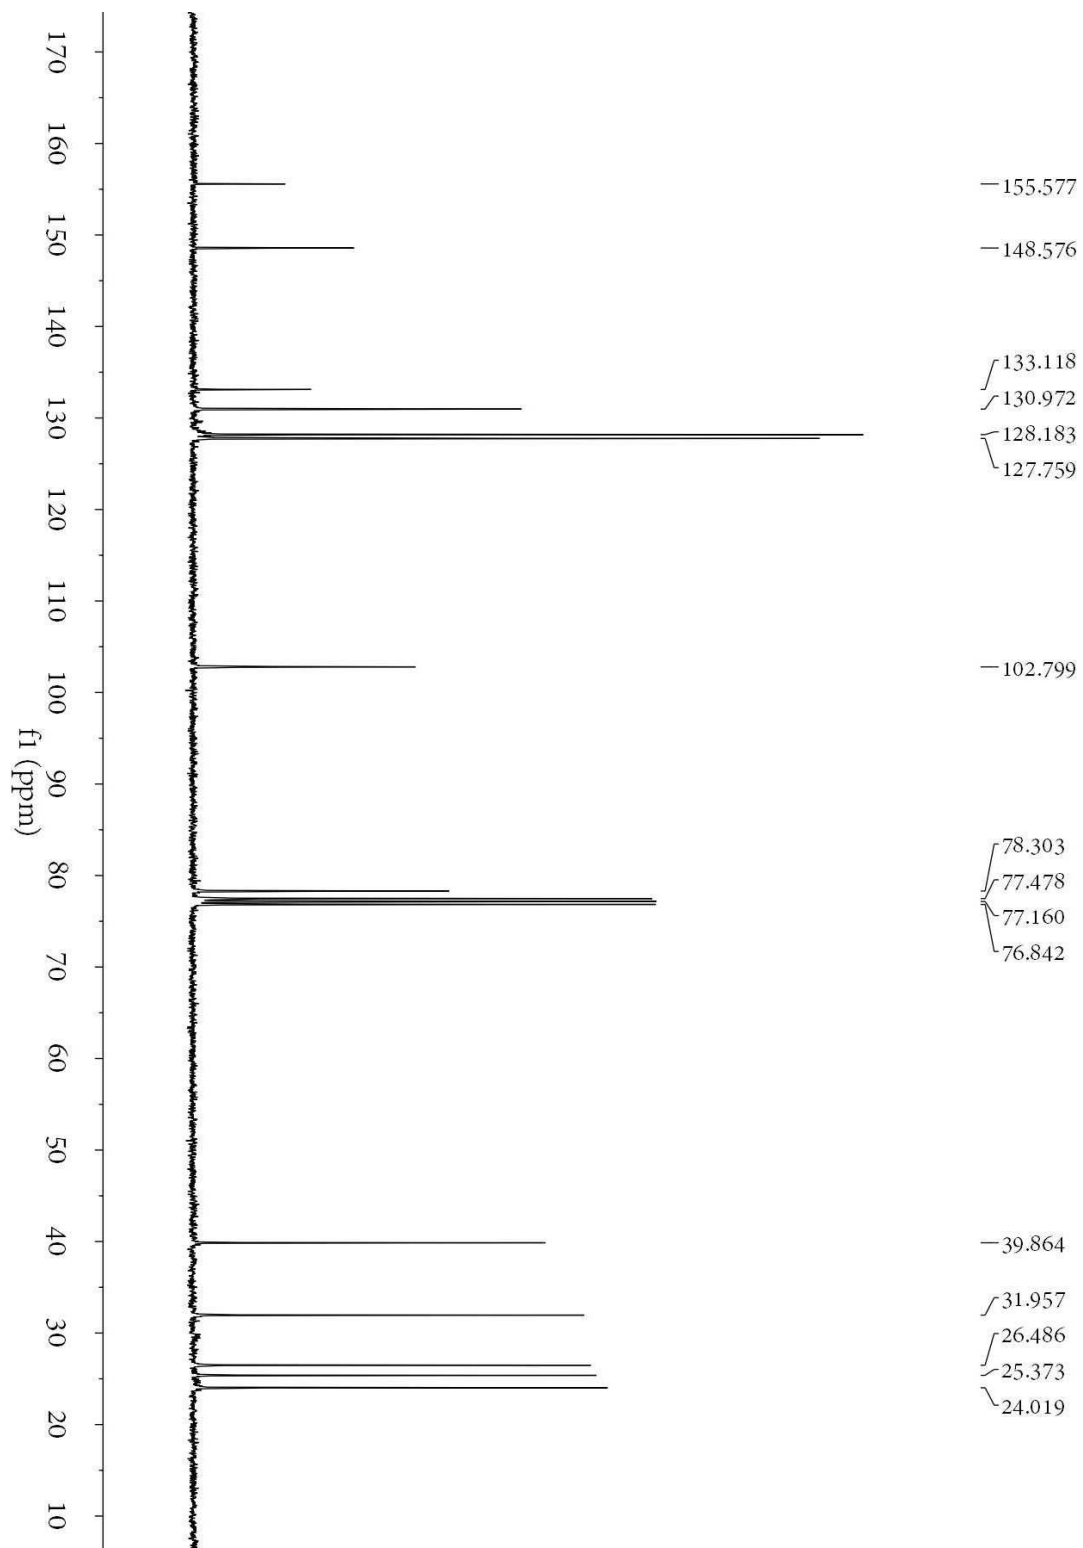

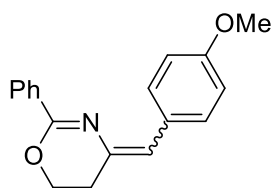

$^1\text{H}$  NMR of **2aa**, 8%  
 $\text{CDCl}_3$ , 400 MHz

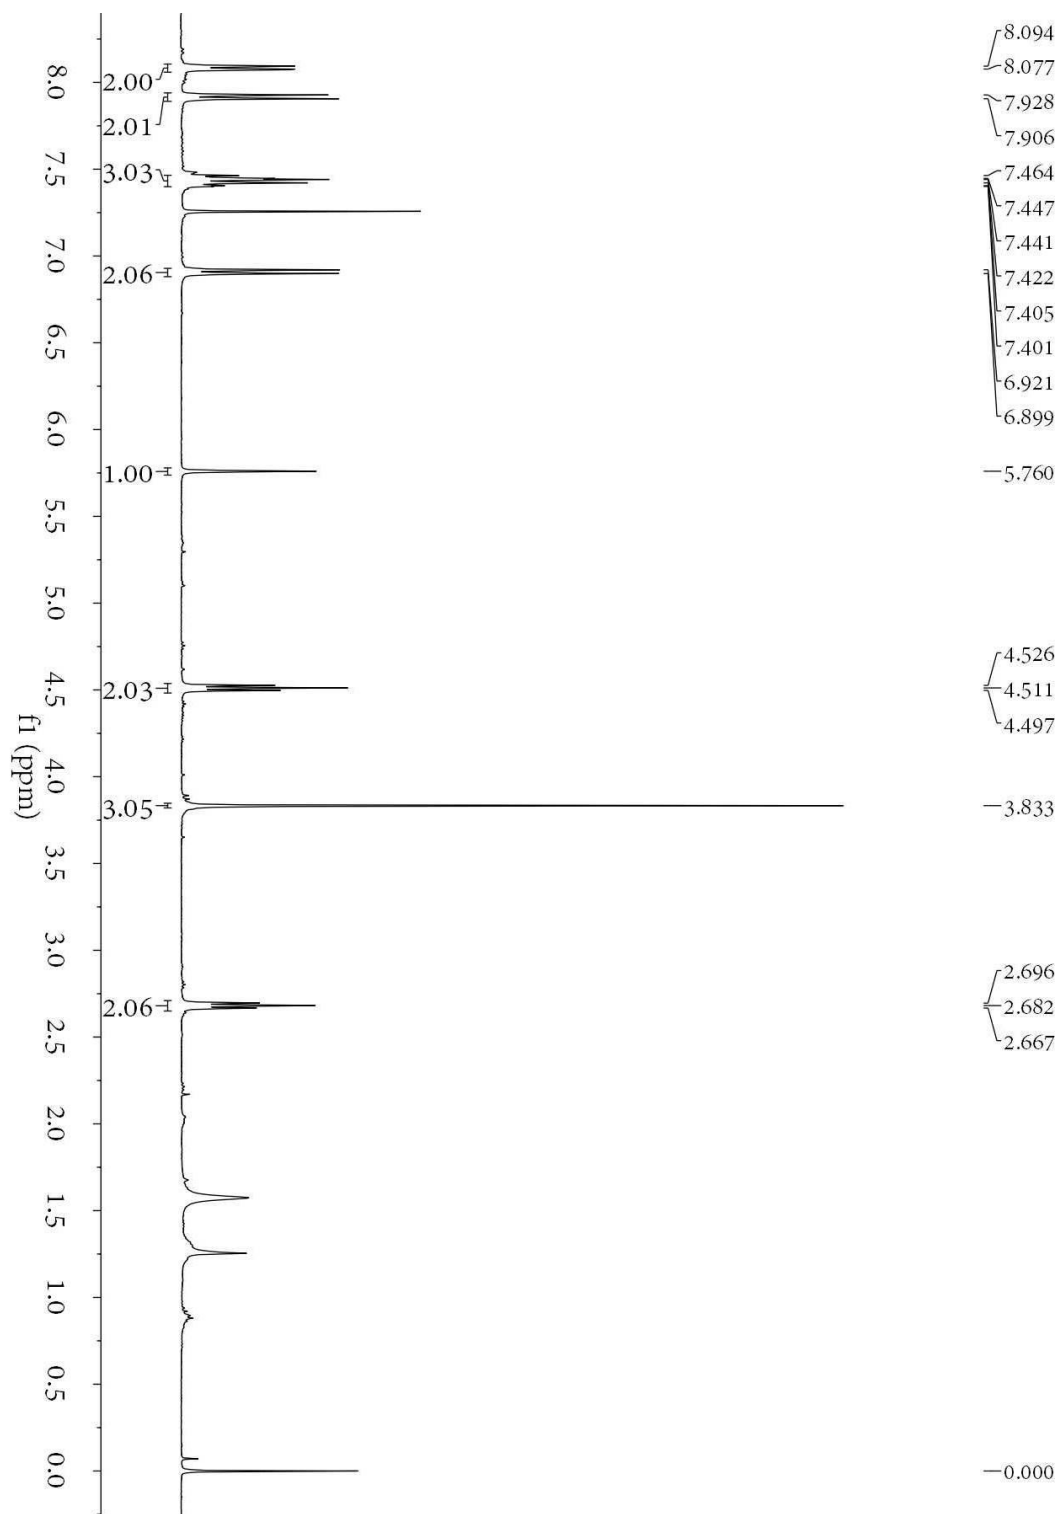

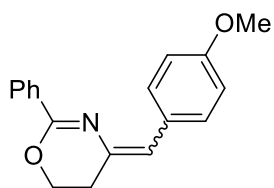

$^{13}\text{C}$  NMR of **2aa**, 8%  
 $\text{CDCl}_3$ , 100 MHz

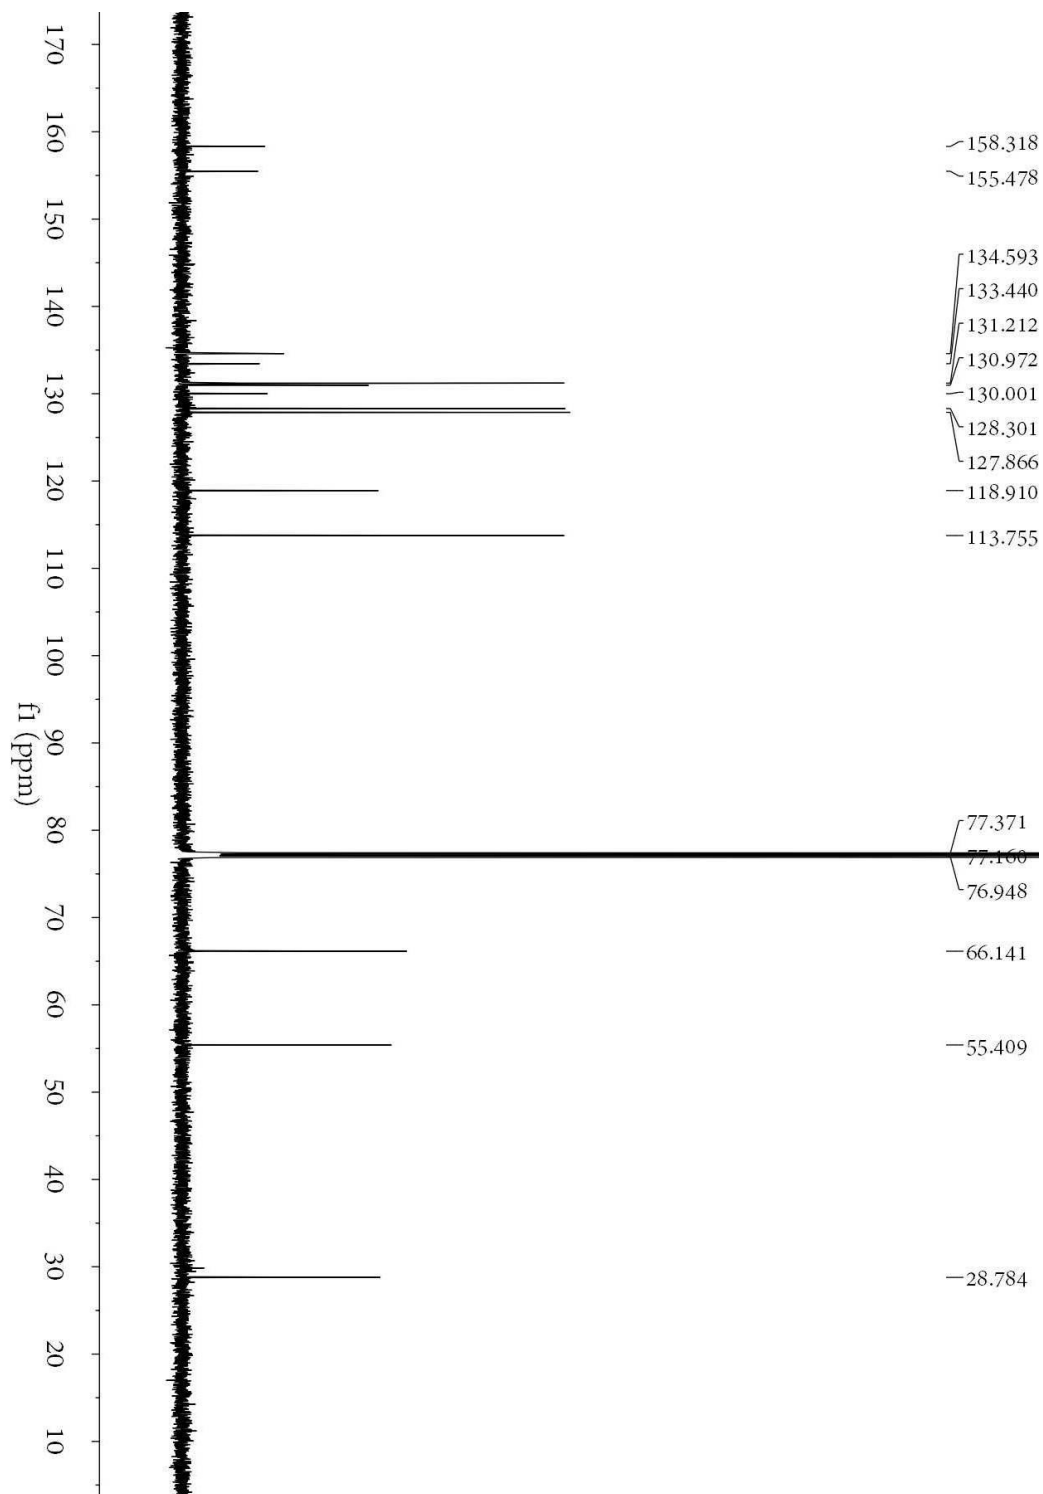

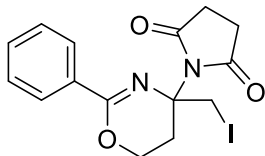

$^1\text{H}$  NMR of **3a**, 46%  
 $\text{CDCl}_3$ , 400 MHz

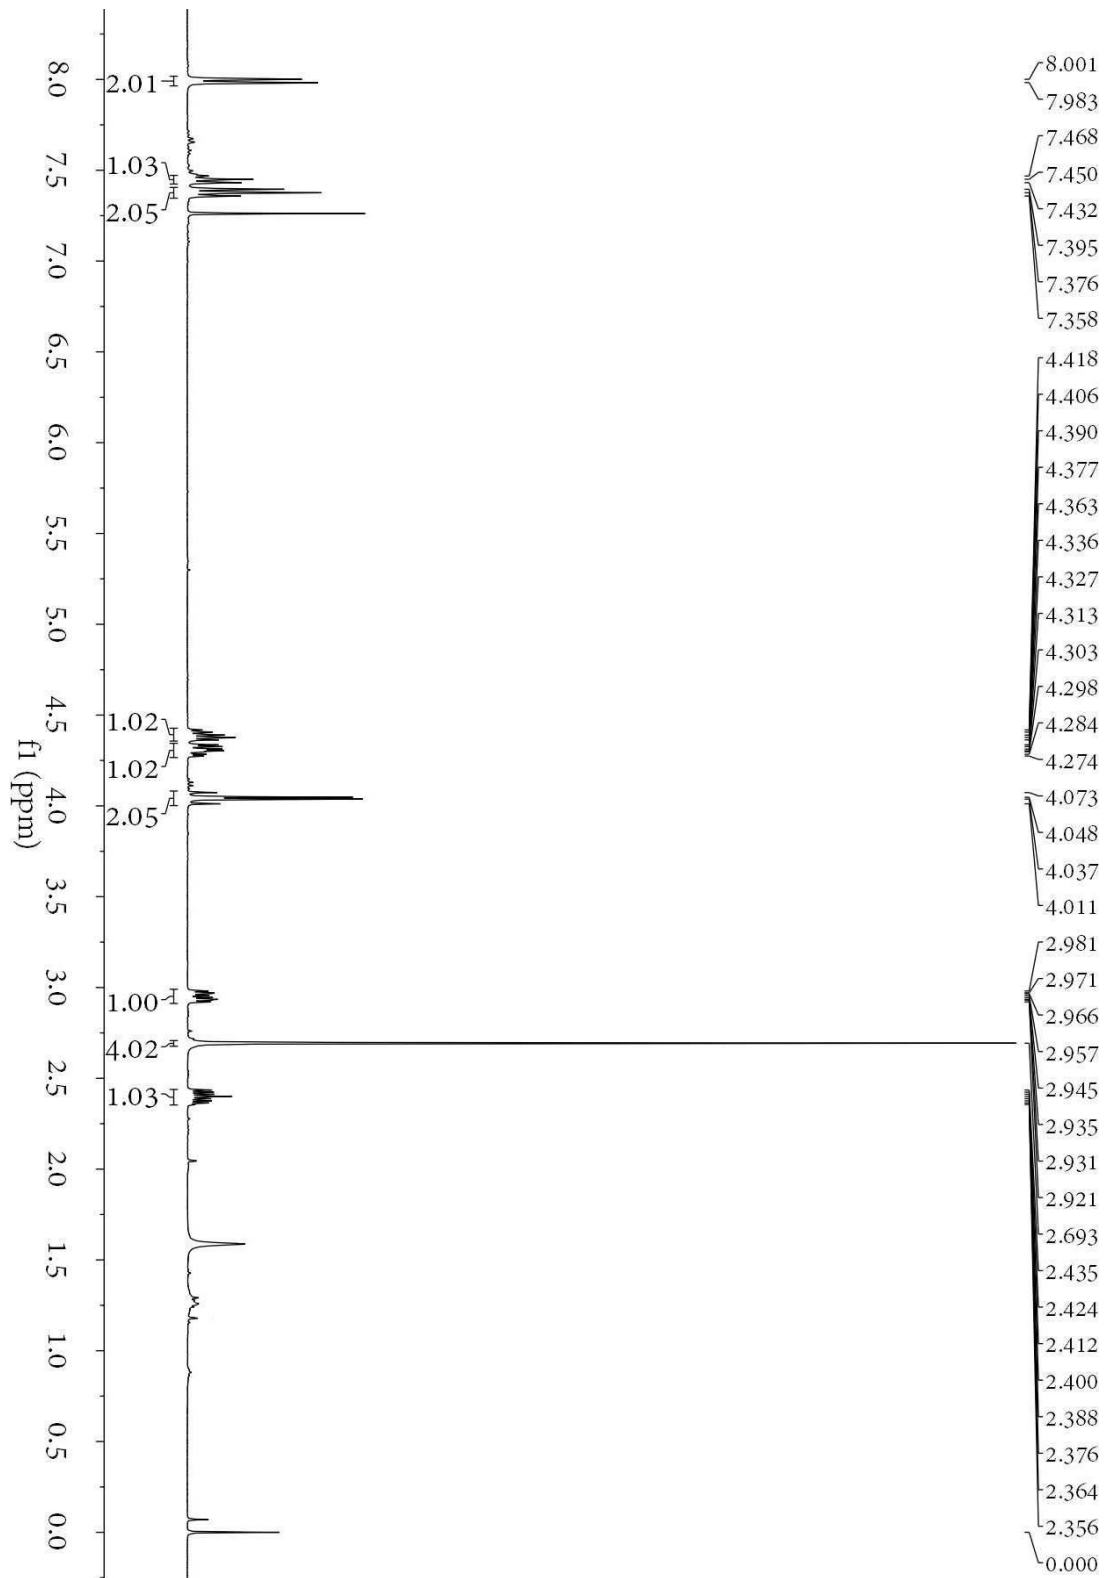



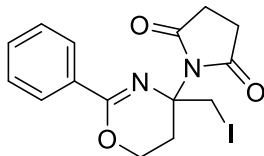

$^{13}\text{C}$  NMR of **3a**, 46%  
 $\text{CDCl}_3$ , 100 MHz

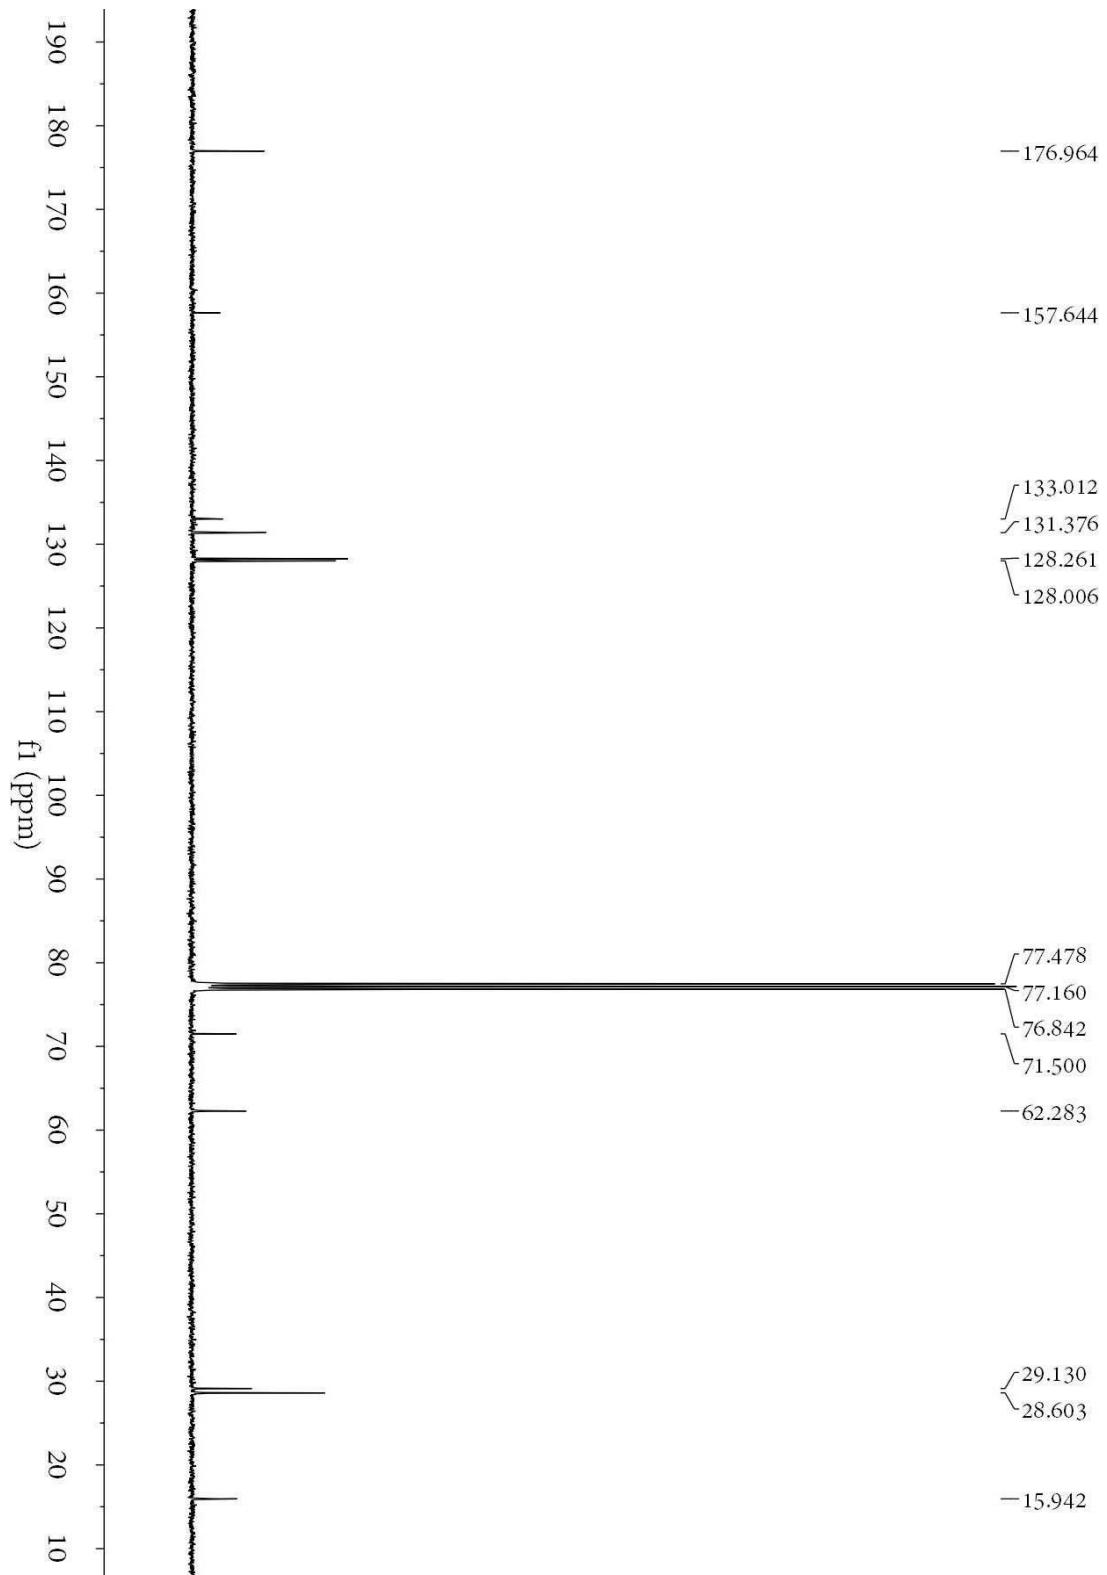

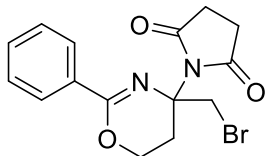

$^1\text{H NMR}$  of **3b**, 56%  
 $\text{CDCl}_3$ , 400 MHz

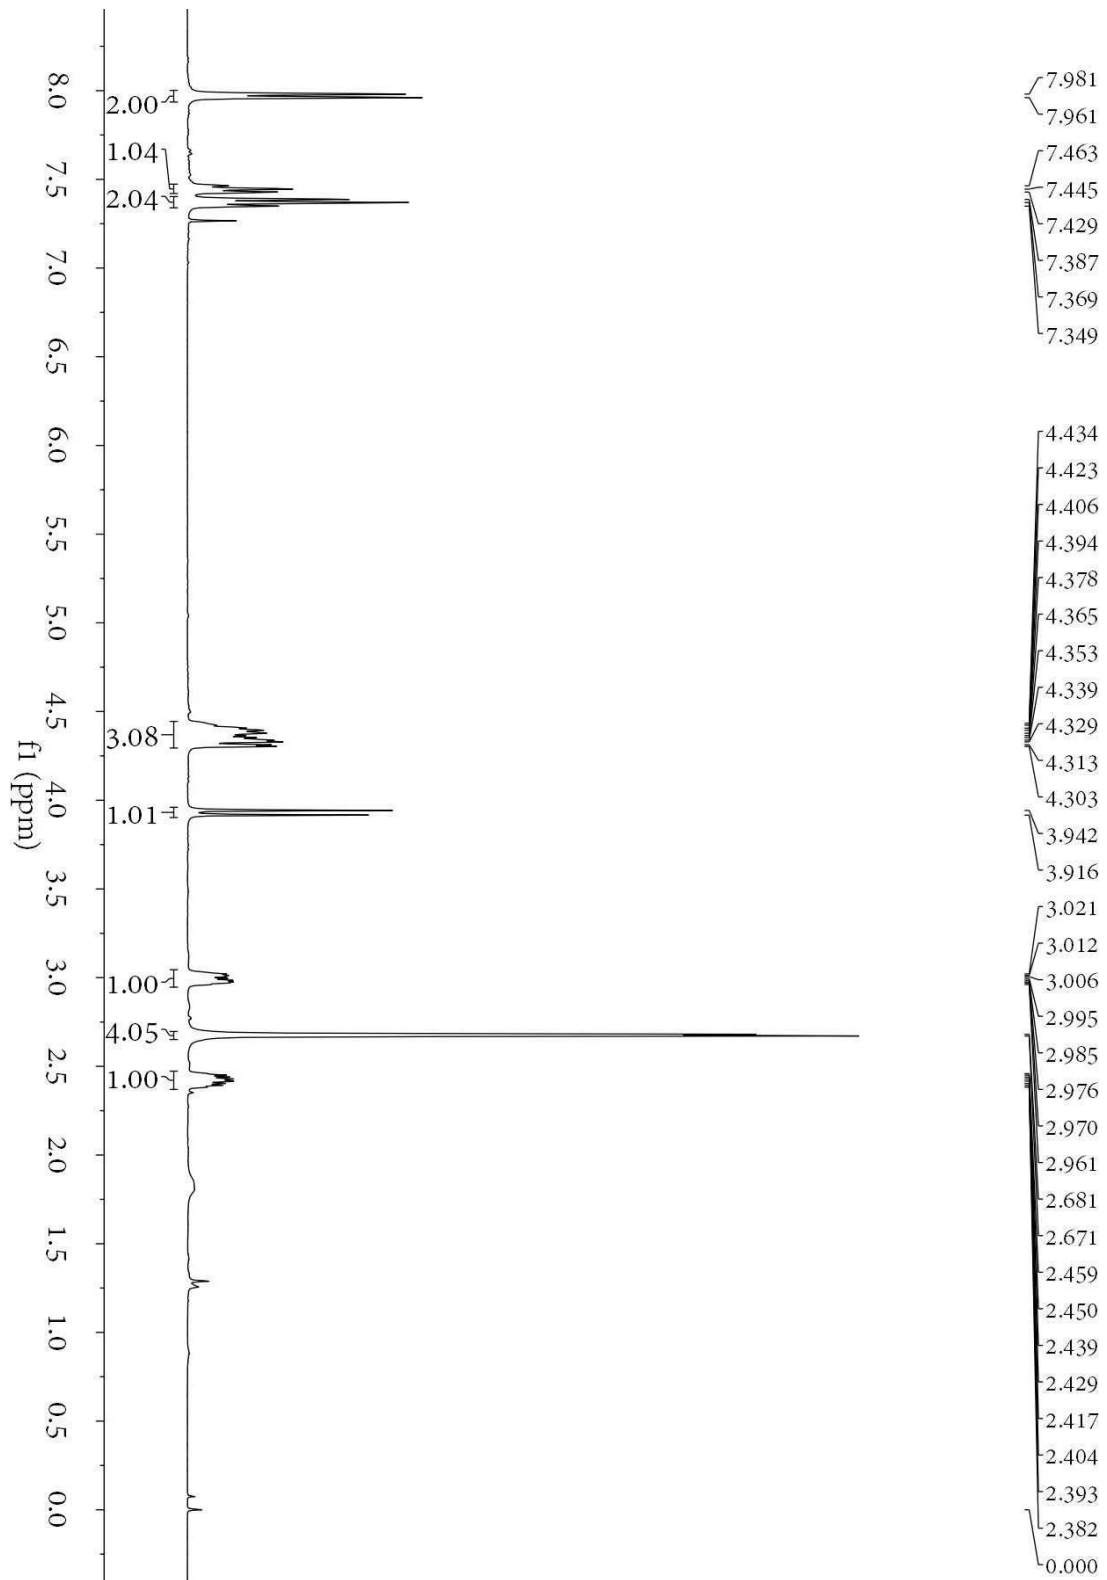

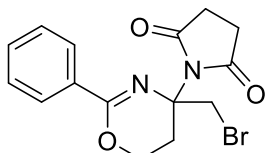

$^{13}\text{C}$  NMR of **3b**, 56%  
 $\text{CDCl}_3$ , 100 MHz

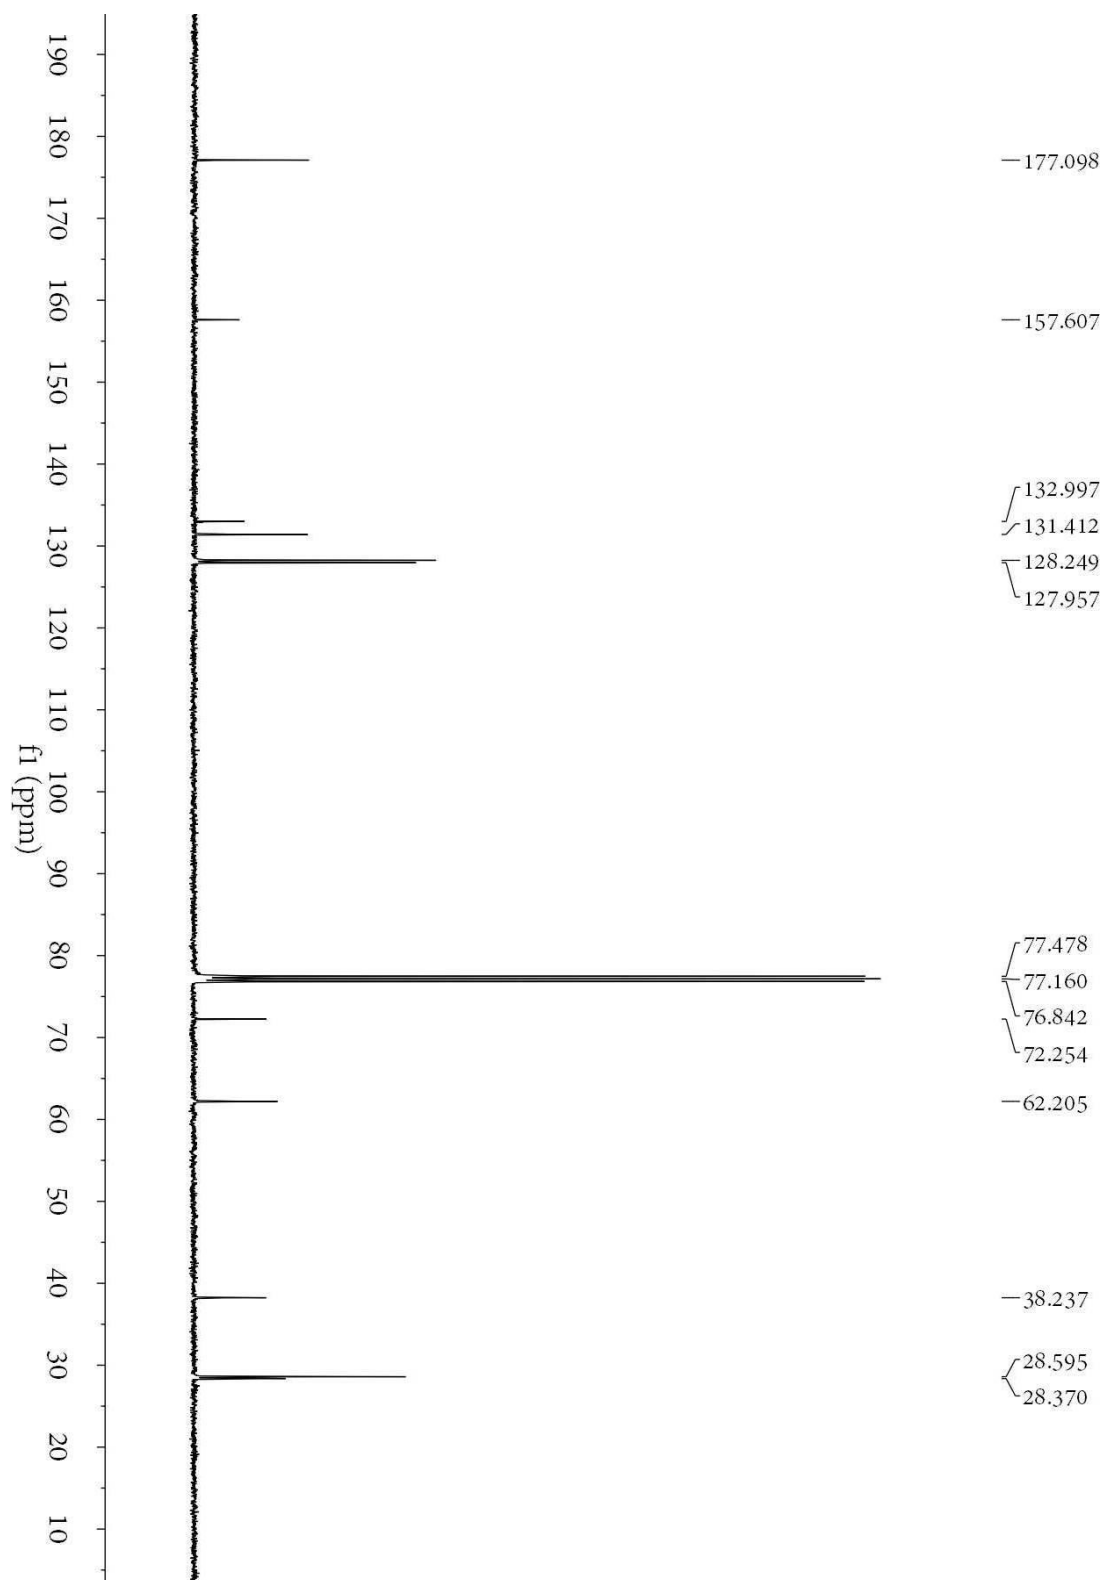

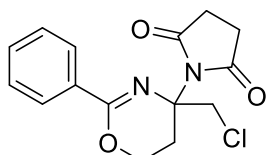

$^1\text{H}$  NMR of **3c**, 57%

$\text{CDCl}_3$ , 400 MHz

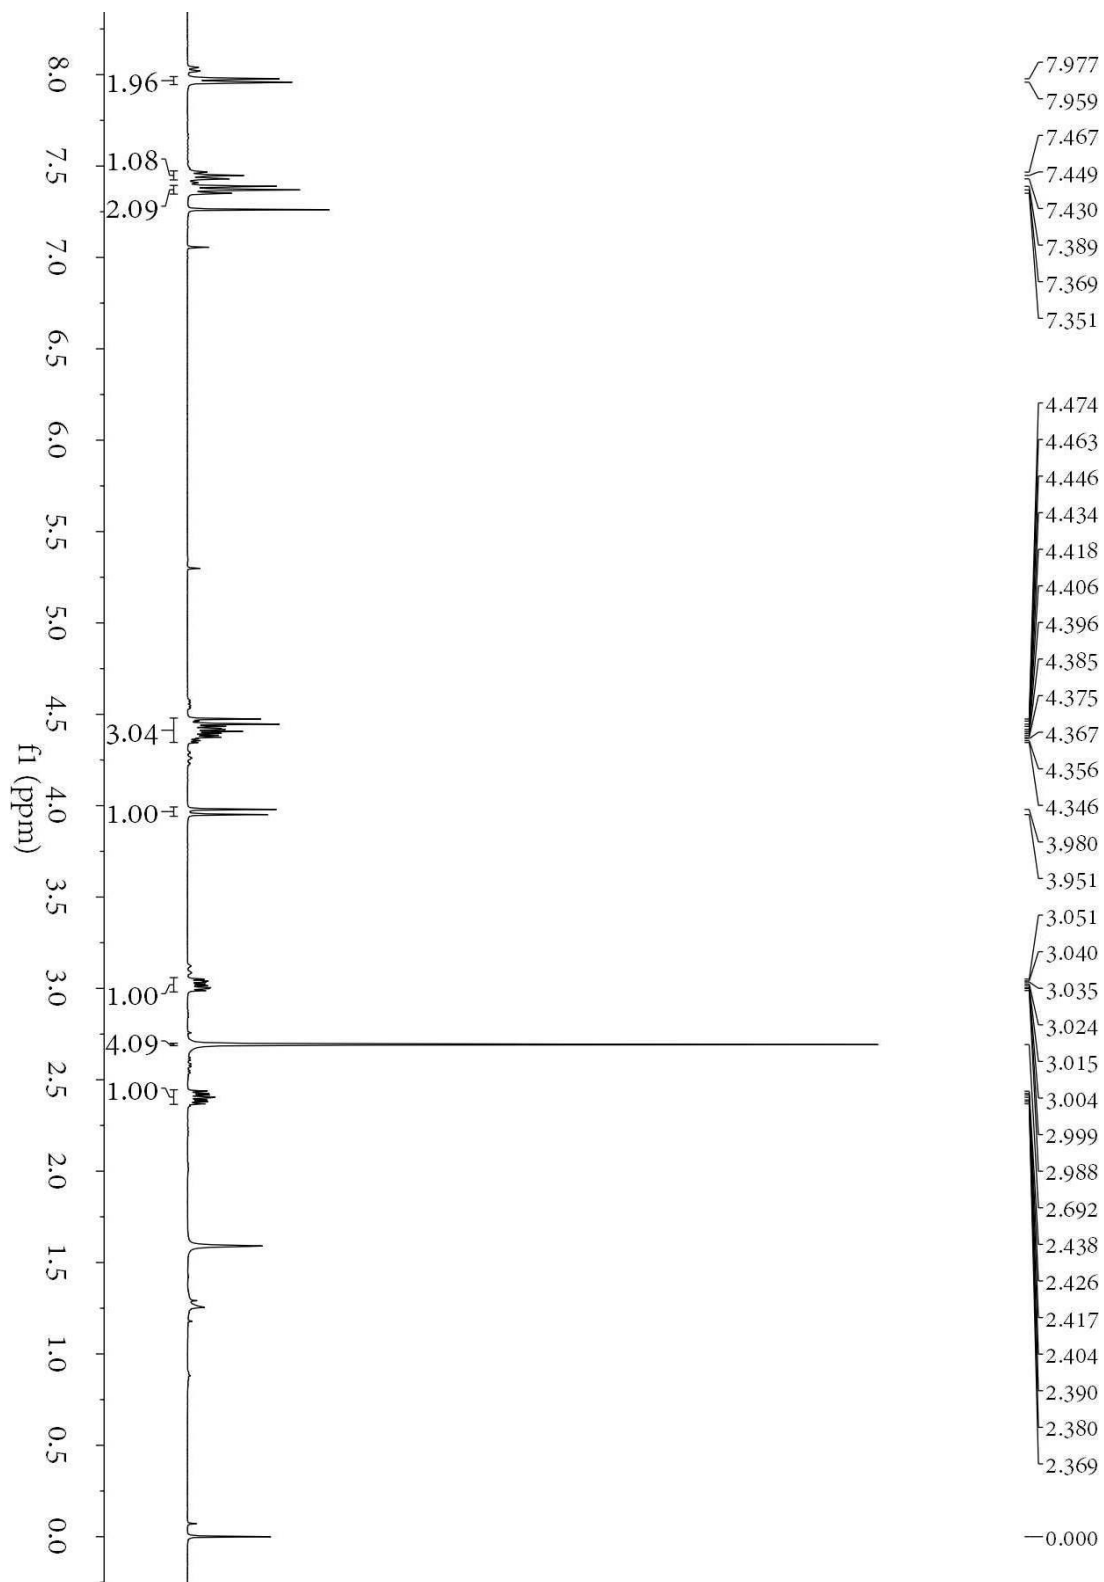

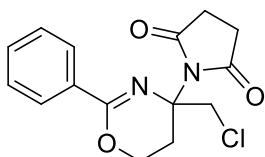

$^{13}\text{C}$  NMR of **3c**, 57%

$\text{CDCl}_3$ , 100 MHz

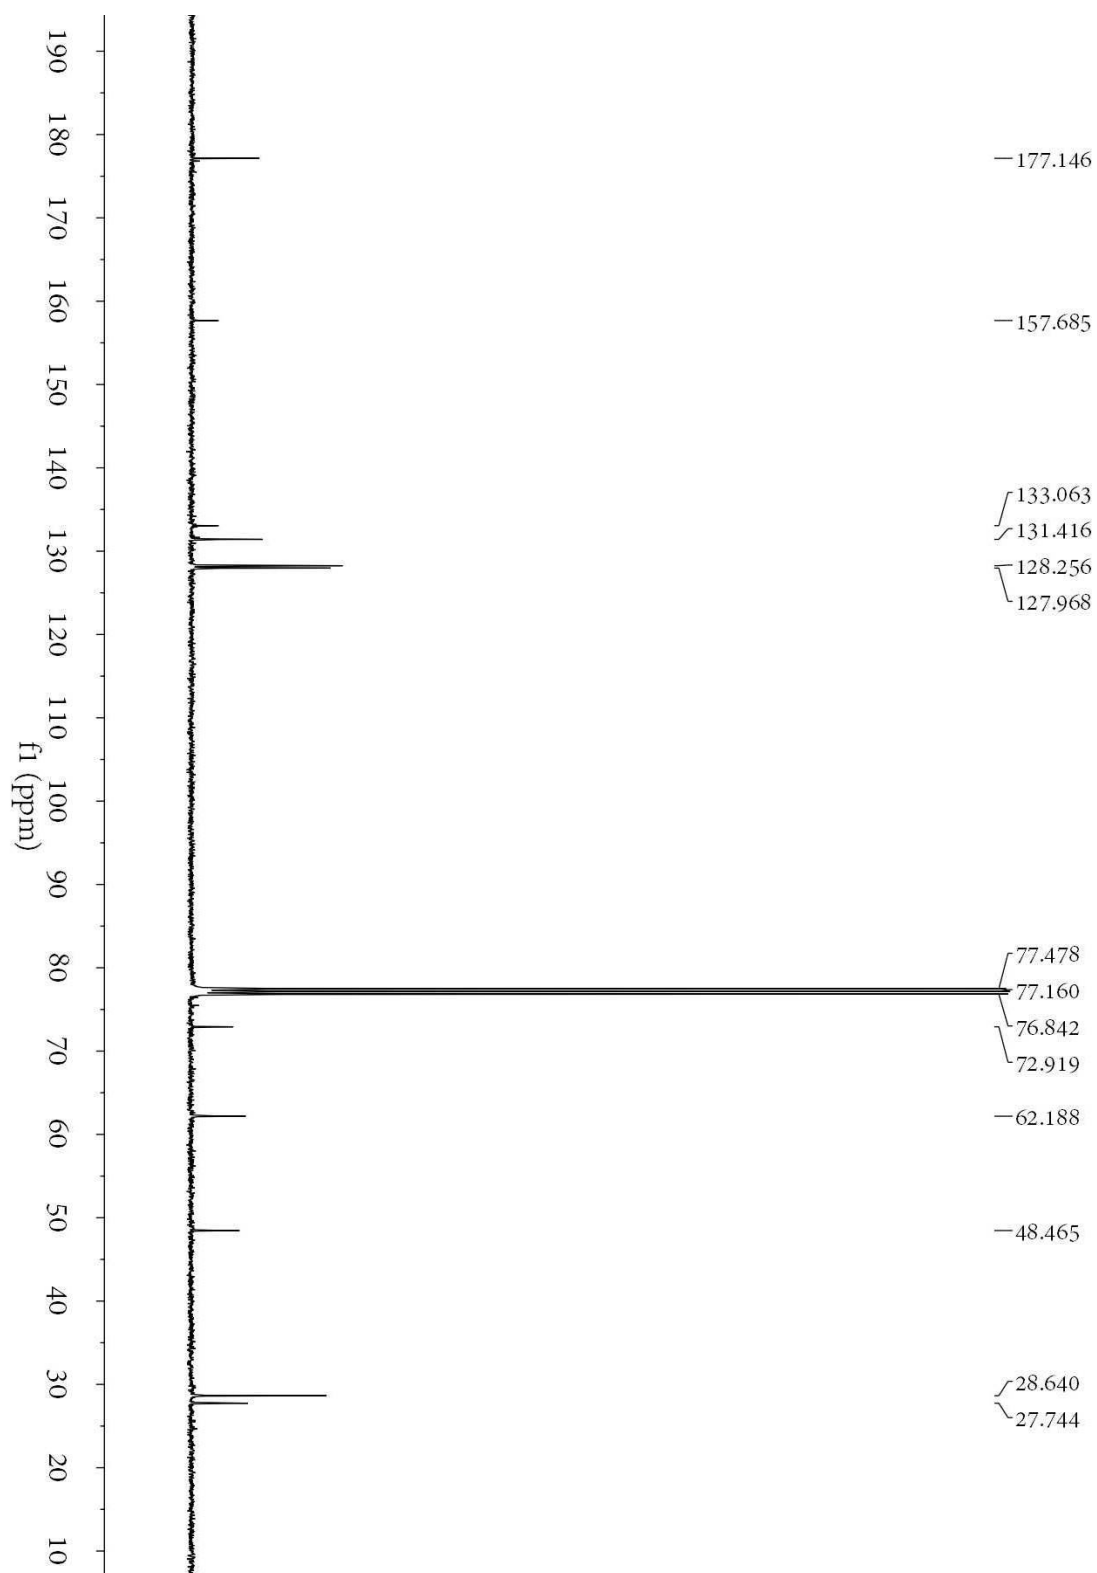

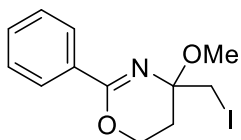

$^1\text{H}$  NMR of **4a**, 89%  
 $\text{CDCl}_3$ , 400 MHz

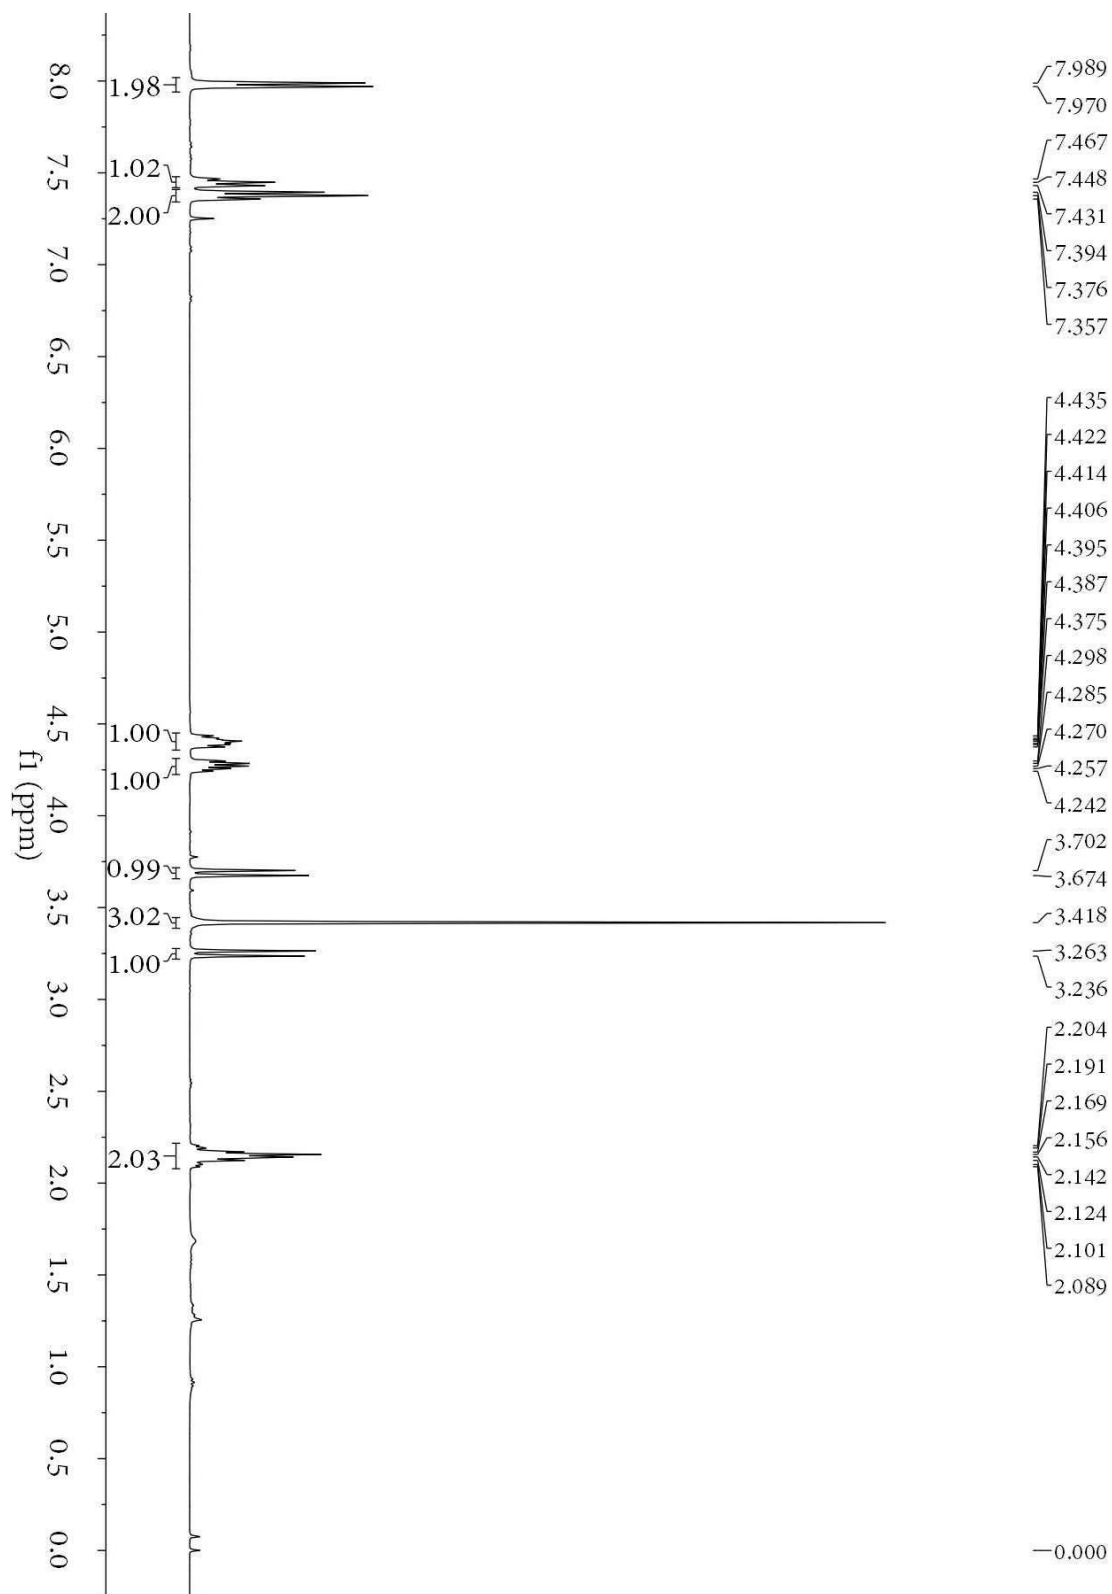

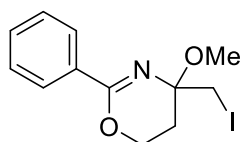

$^{13}\text{C}$  NMR of **4a**, 89%

$\text{CDCl}_3$ , 100 MHz

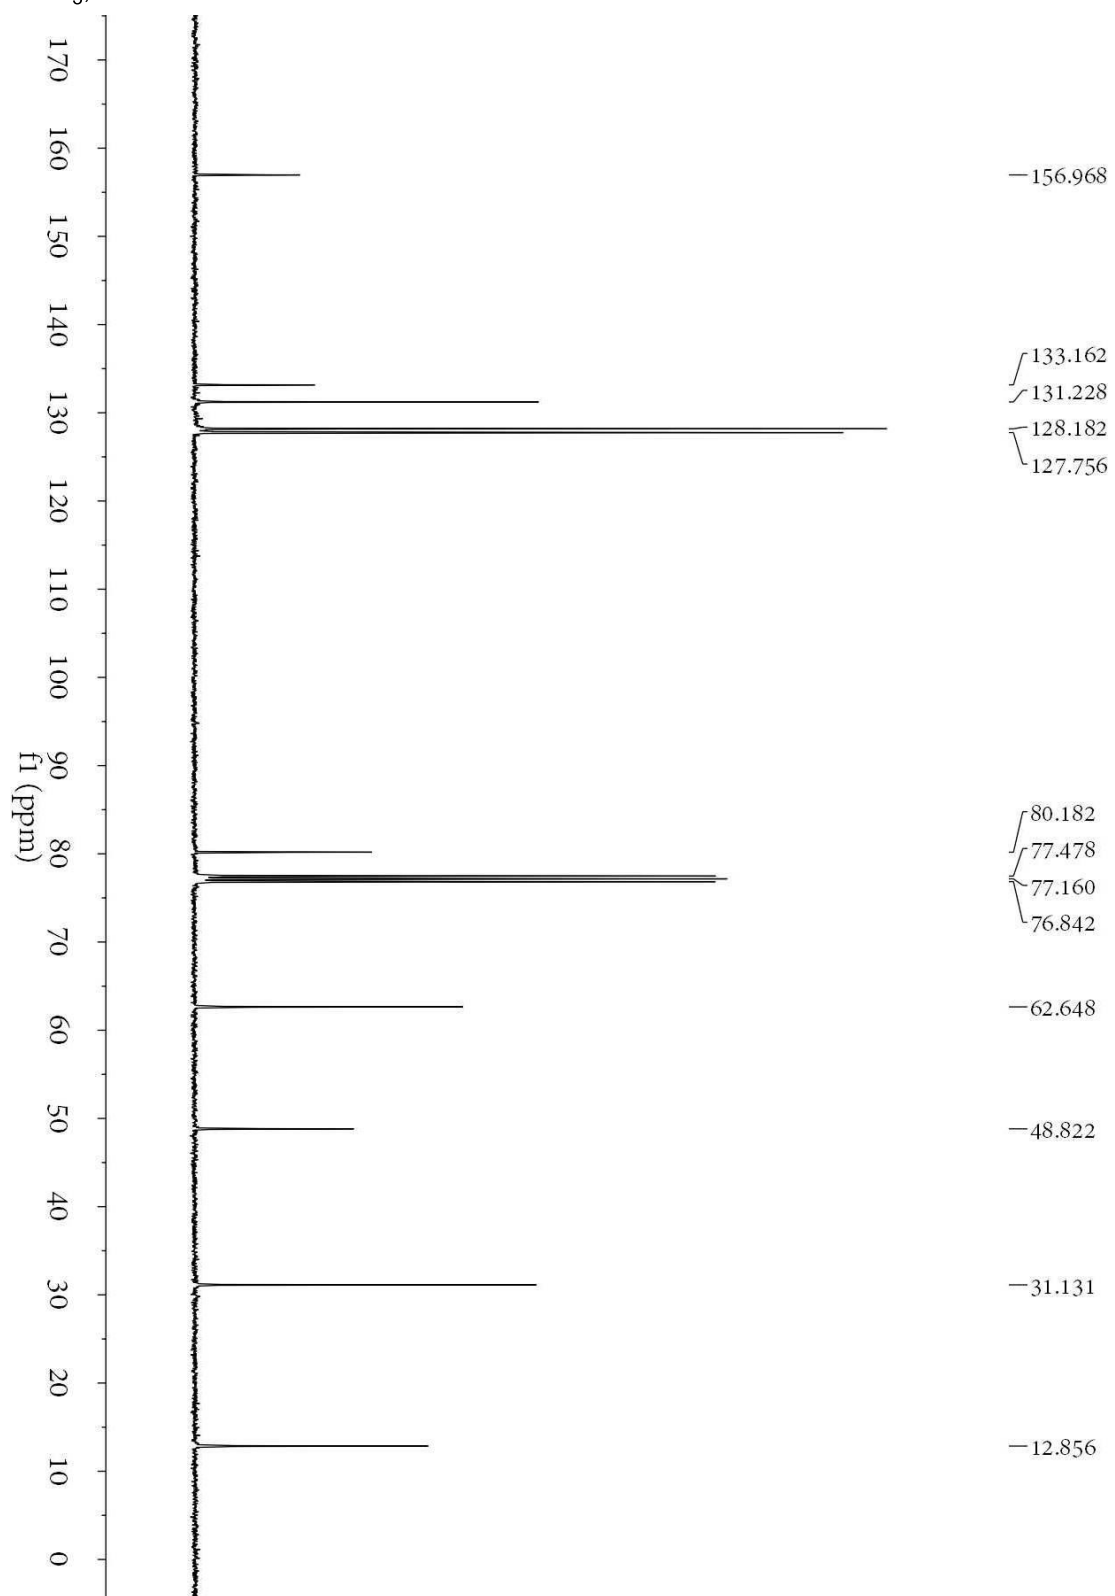

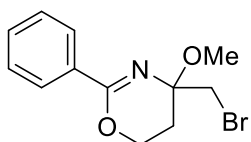

$^1\text{H}$  NMR of **4b**, 70%  
 $\text{CDCl}_3$ , 400 MHz

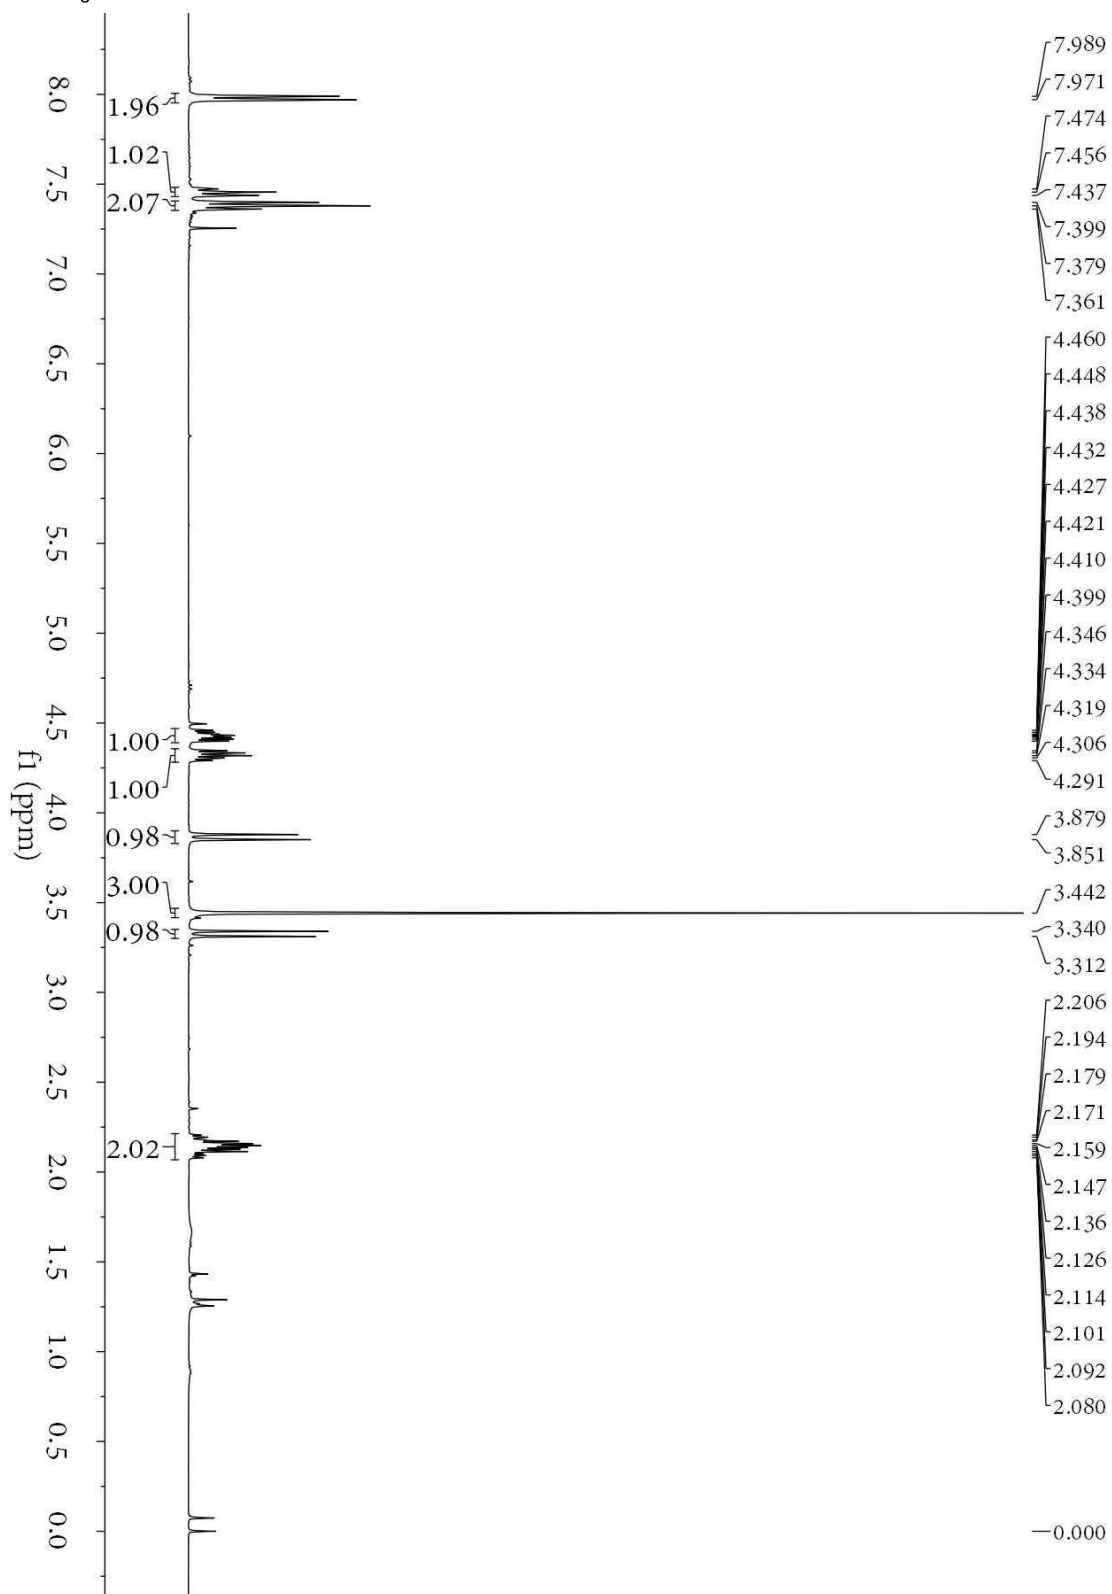



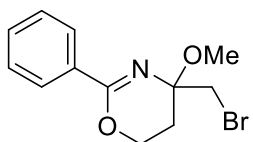

$^{13}\text{C}$  NMR of **4b**, 70%  
 $\text{CDCl}_3$ , 100 MHz

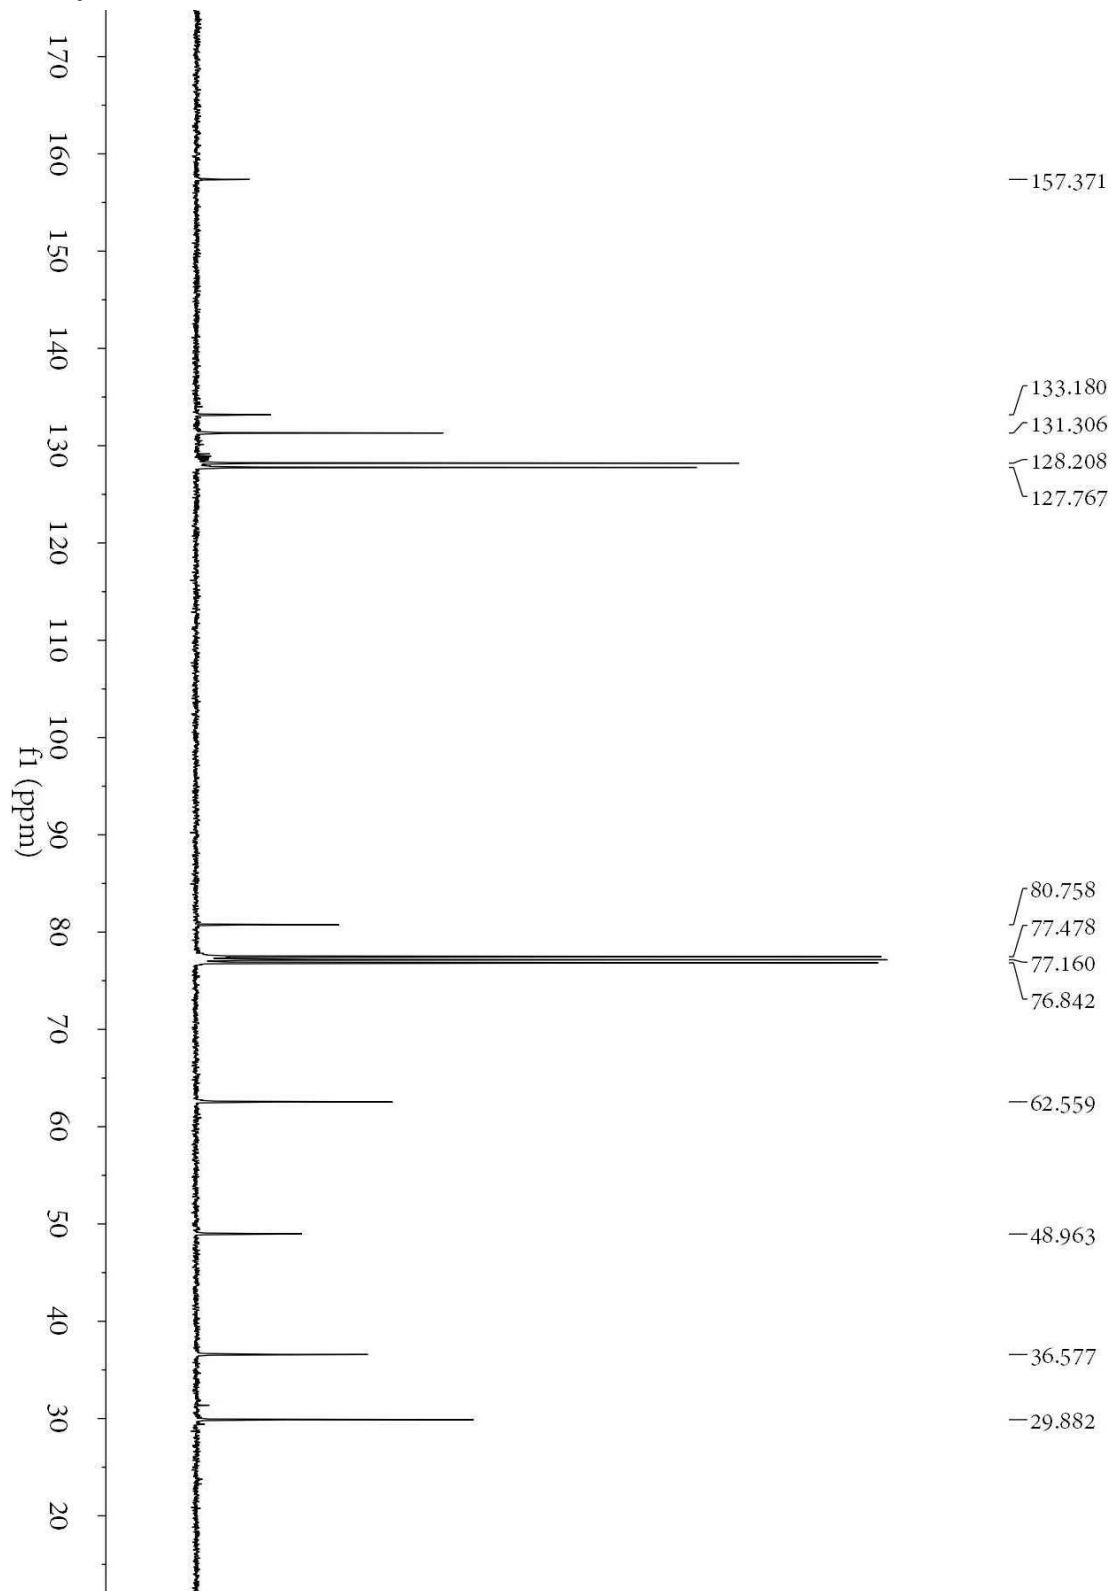

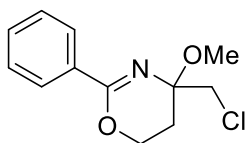

$^1\text{H}$  NMR of **4c**, 72%  
 $\text{CDCl}_3$ , 400 MHz

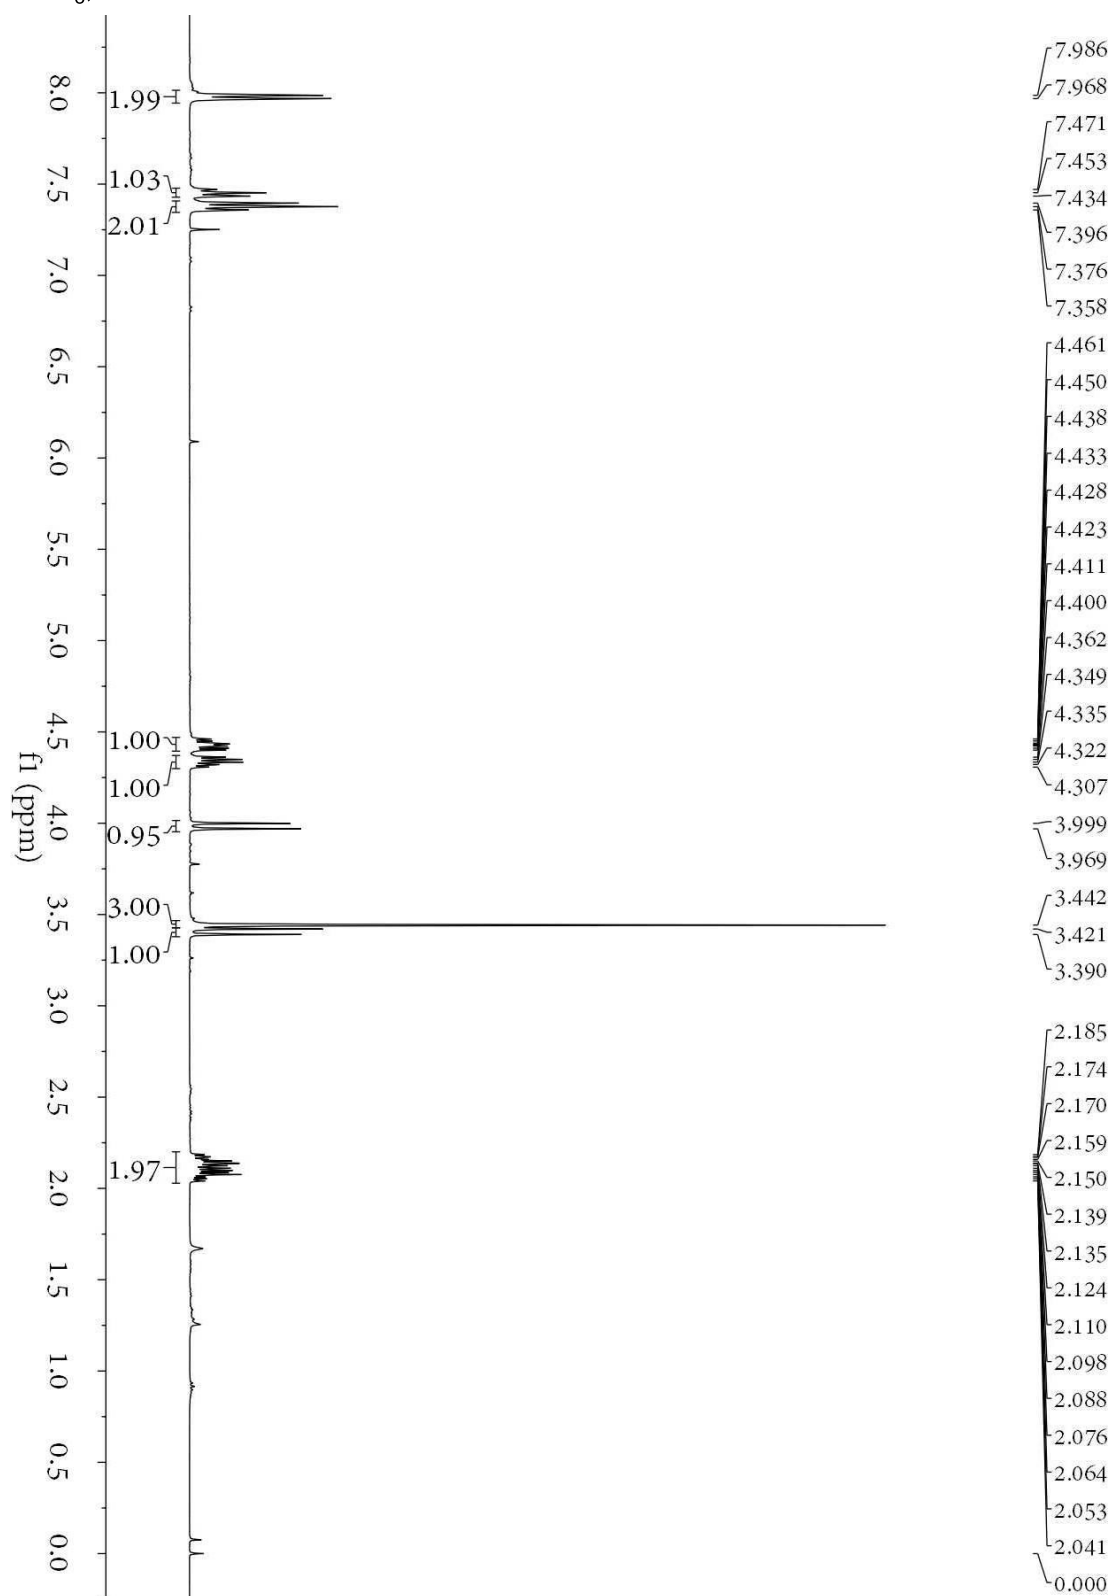

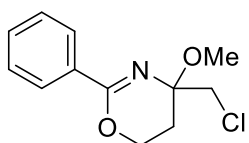

$^{13}\text{C}$  NMR of **4c**, 72%

$\text{CDCl}_3$ , 100 MHz

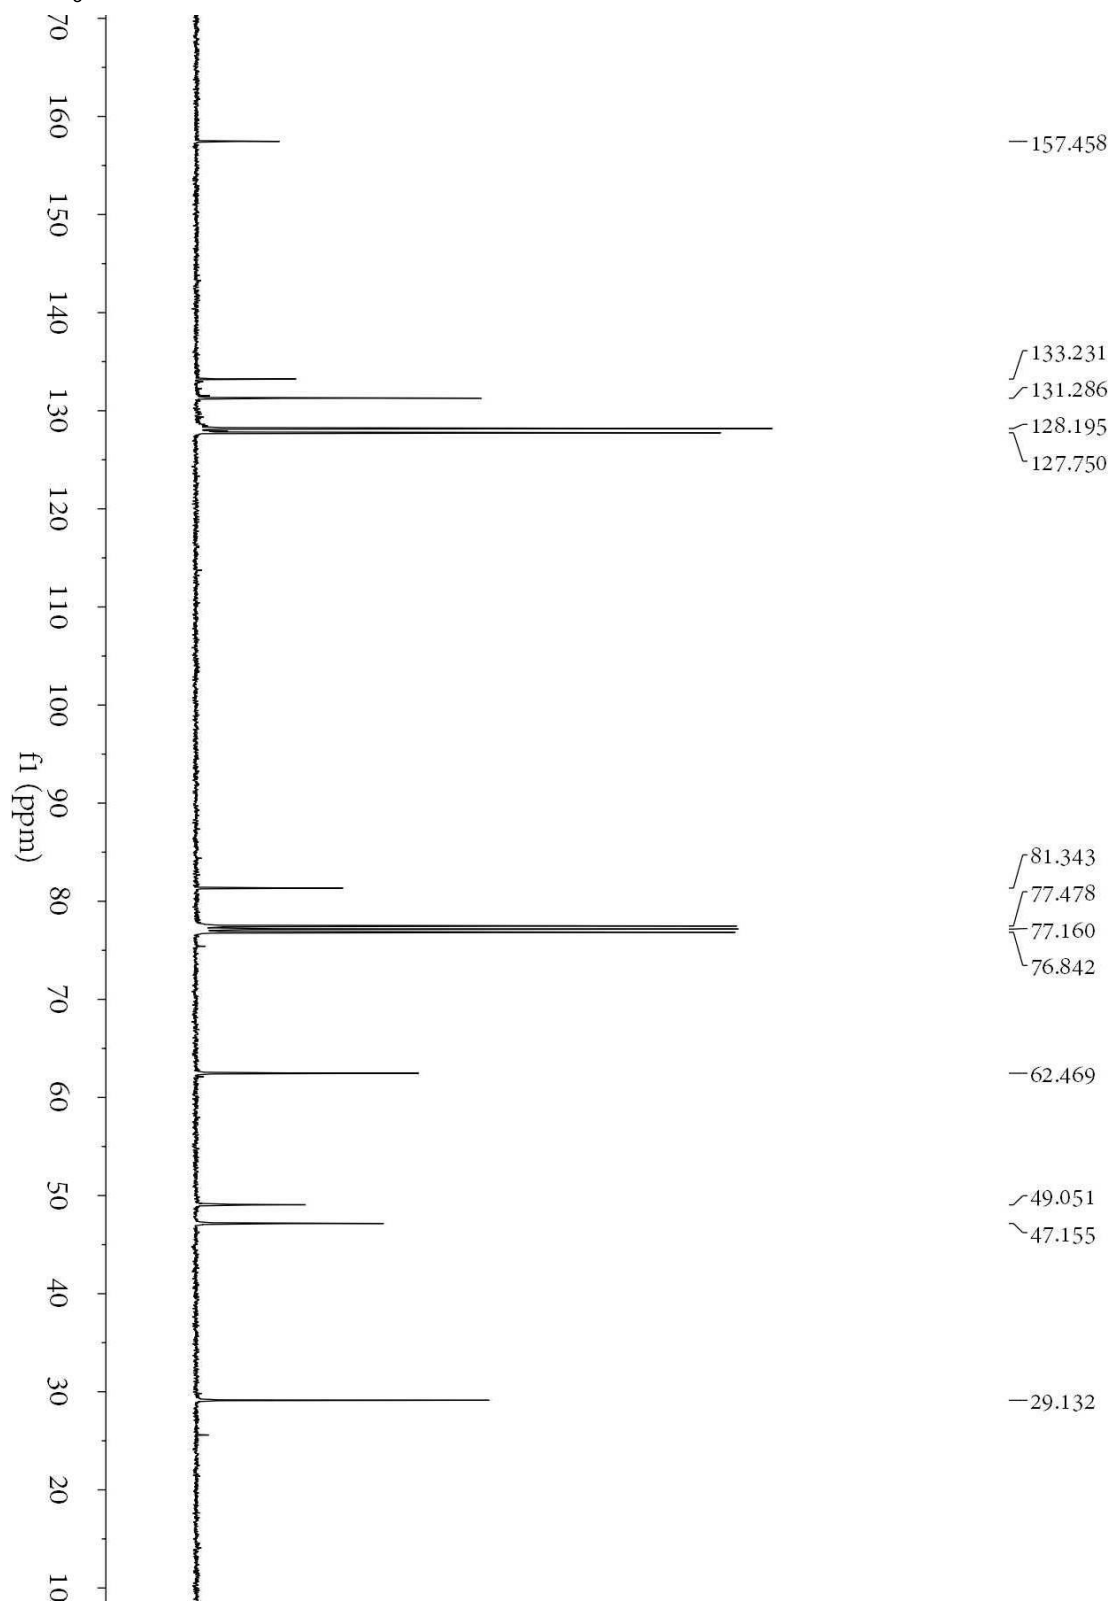

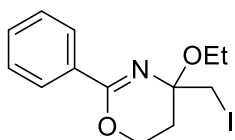

$^1\text{H}$  NMR of **5a**, 79%

$\text{CDCl}_3$ , 400 MHz

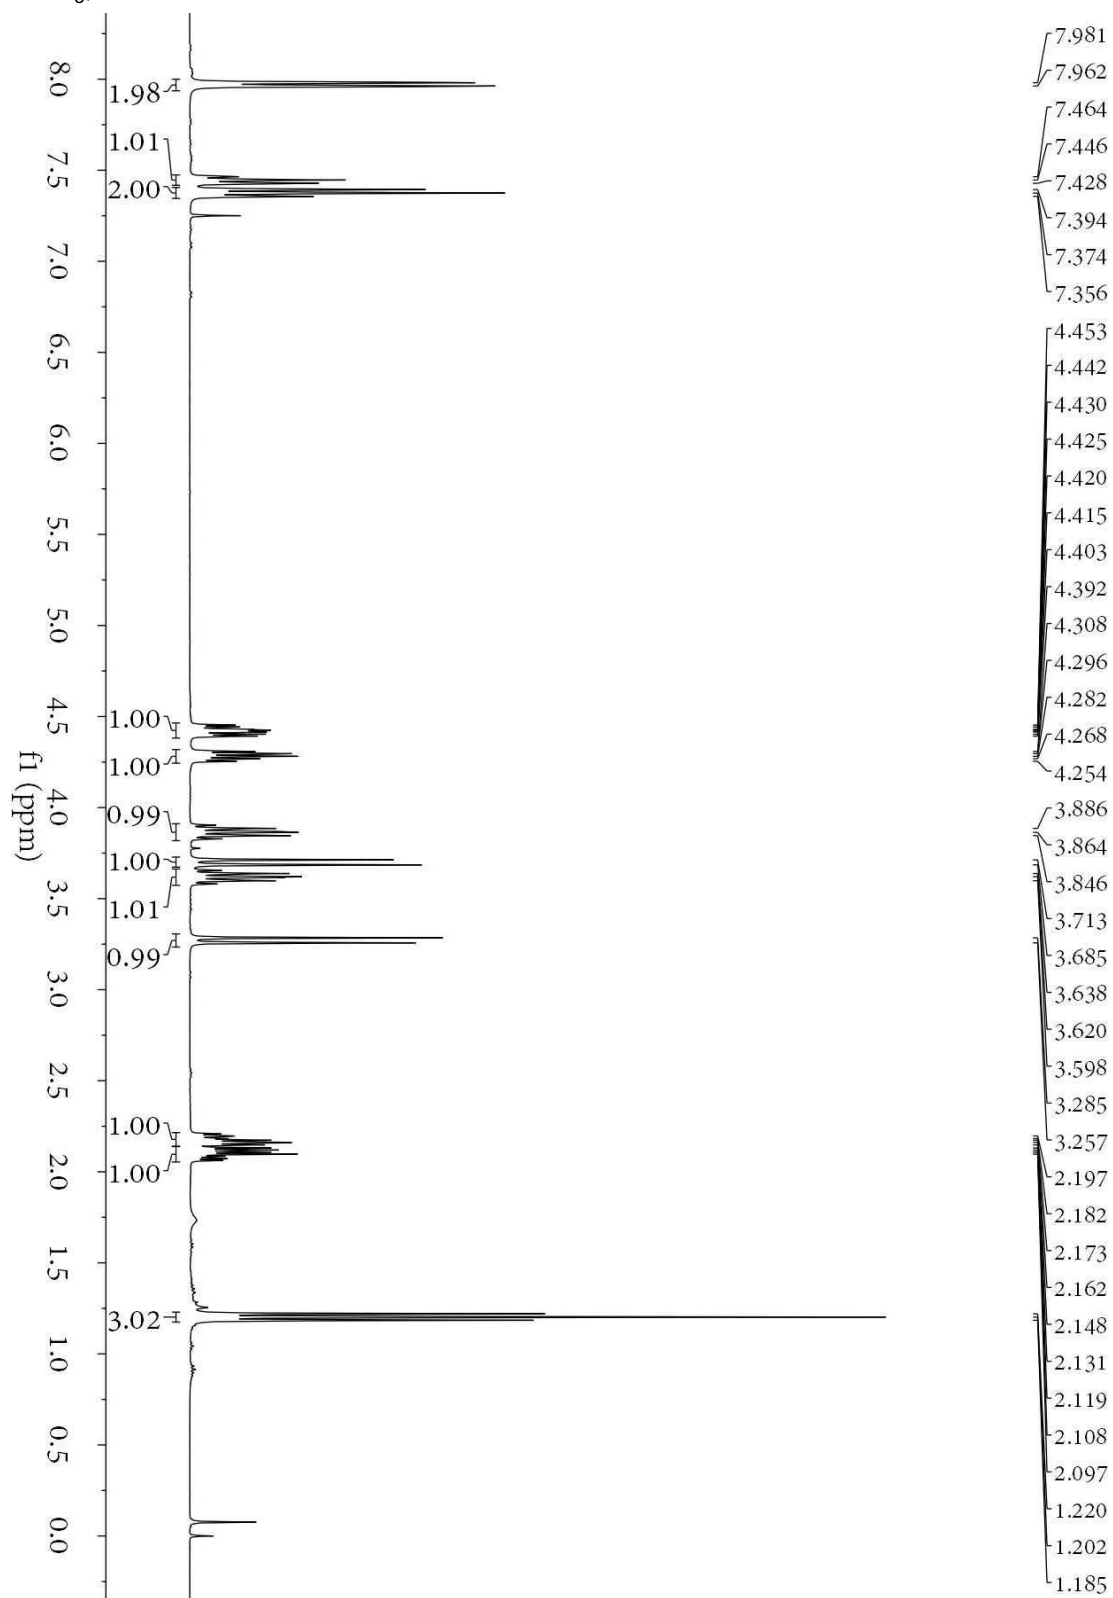

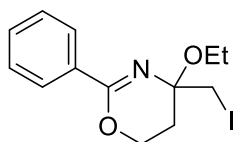

$^{13}\text{C}$  NMR of **5a**, 79%

$\text{CDCl}_3$ , 100 MHz

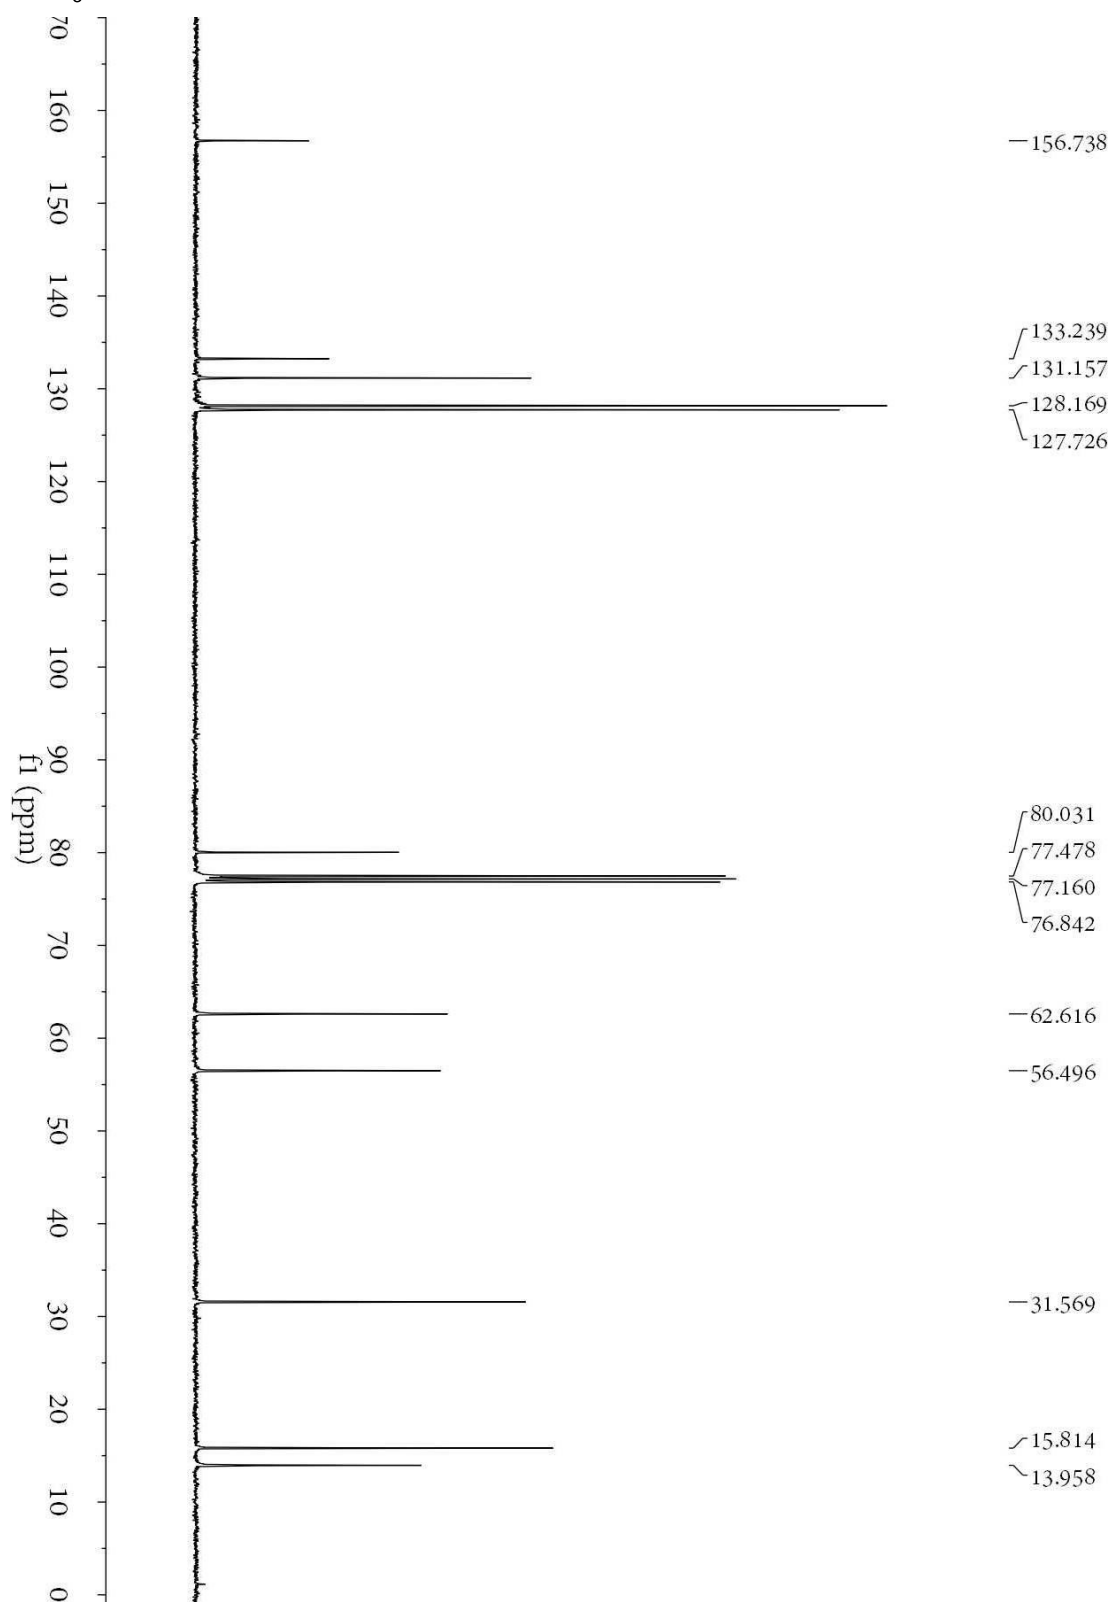

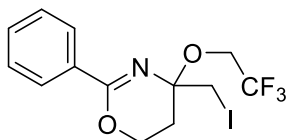

$^1\text{H}$  NMR of **5b**, 86%

$\text{CDCl}_3$ , 400 MHz

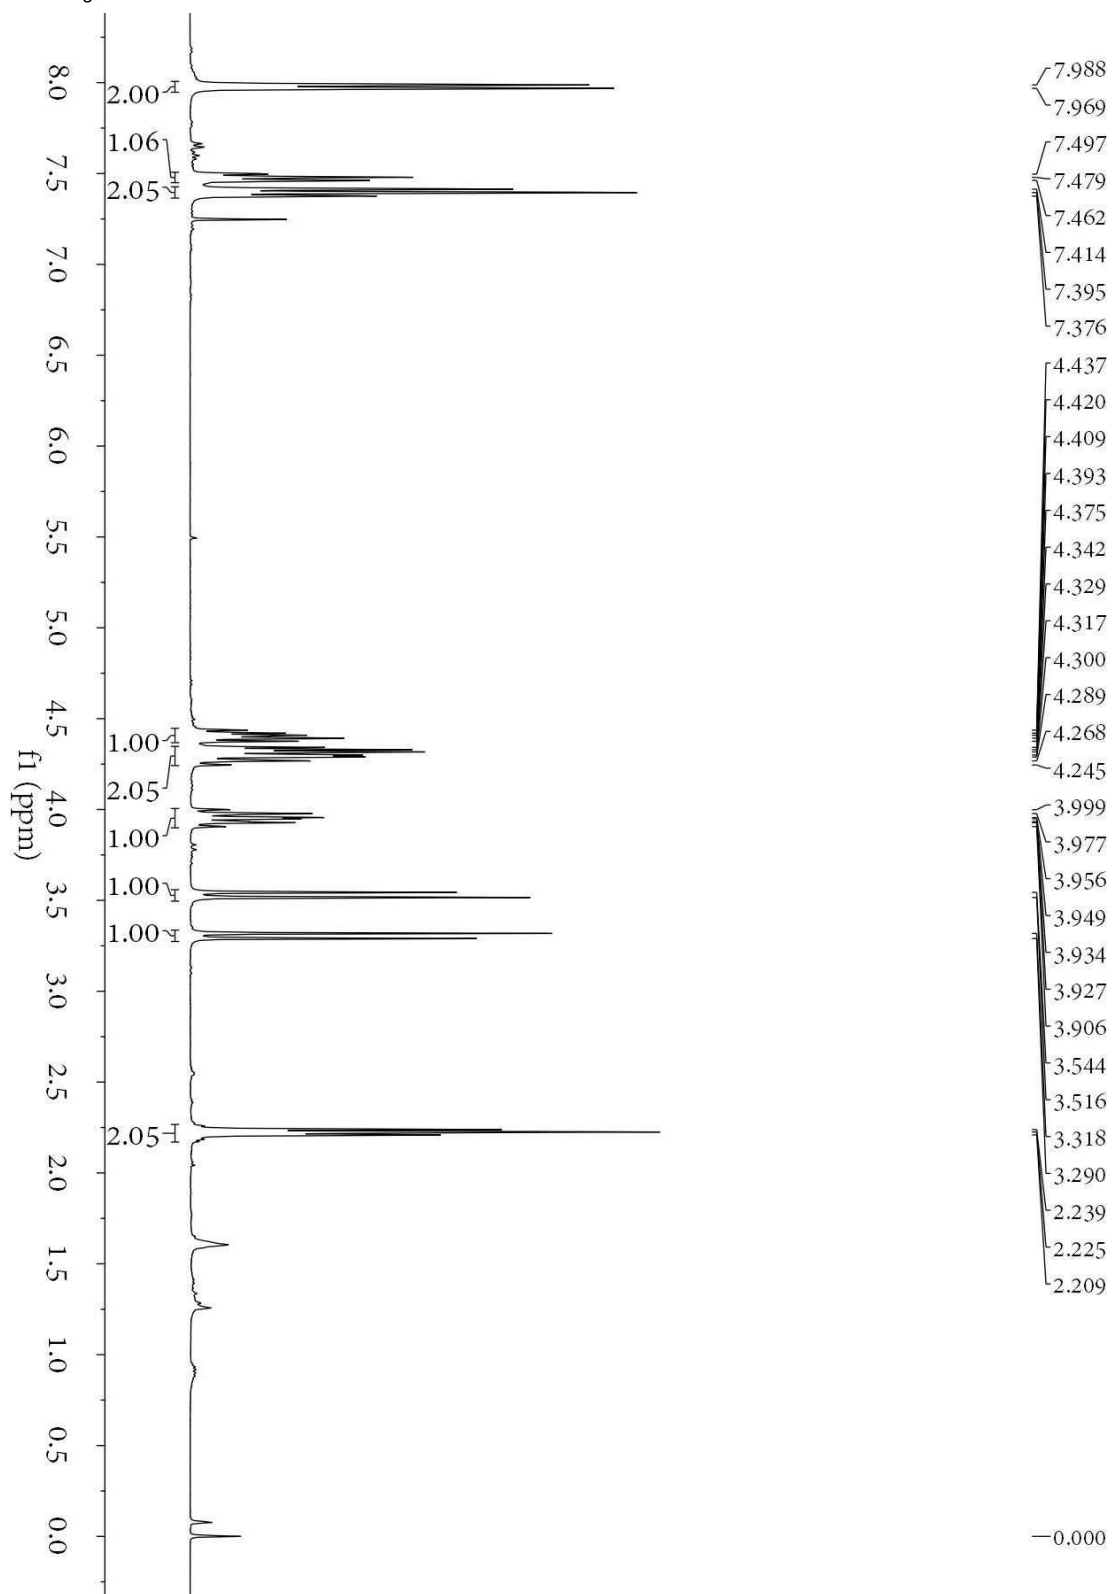

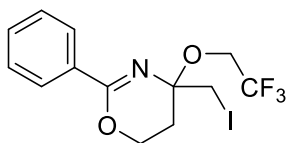

$^{13}\text{C}$  NMR of **5b**, 86%  
 $\text{CDCl}_3$ , 100 MHz

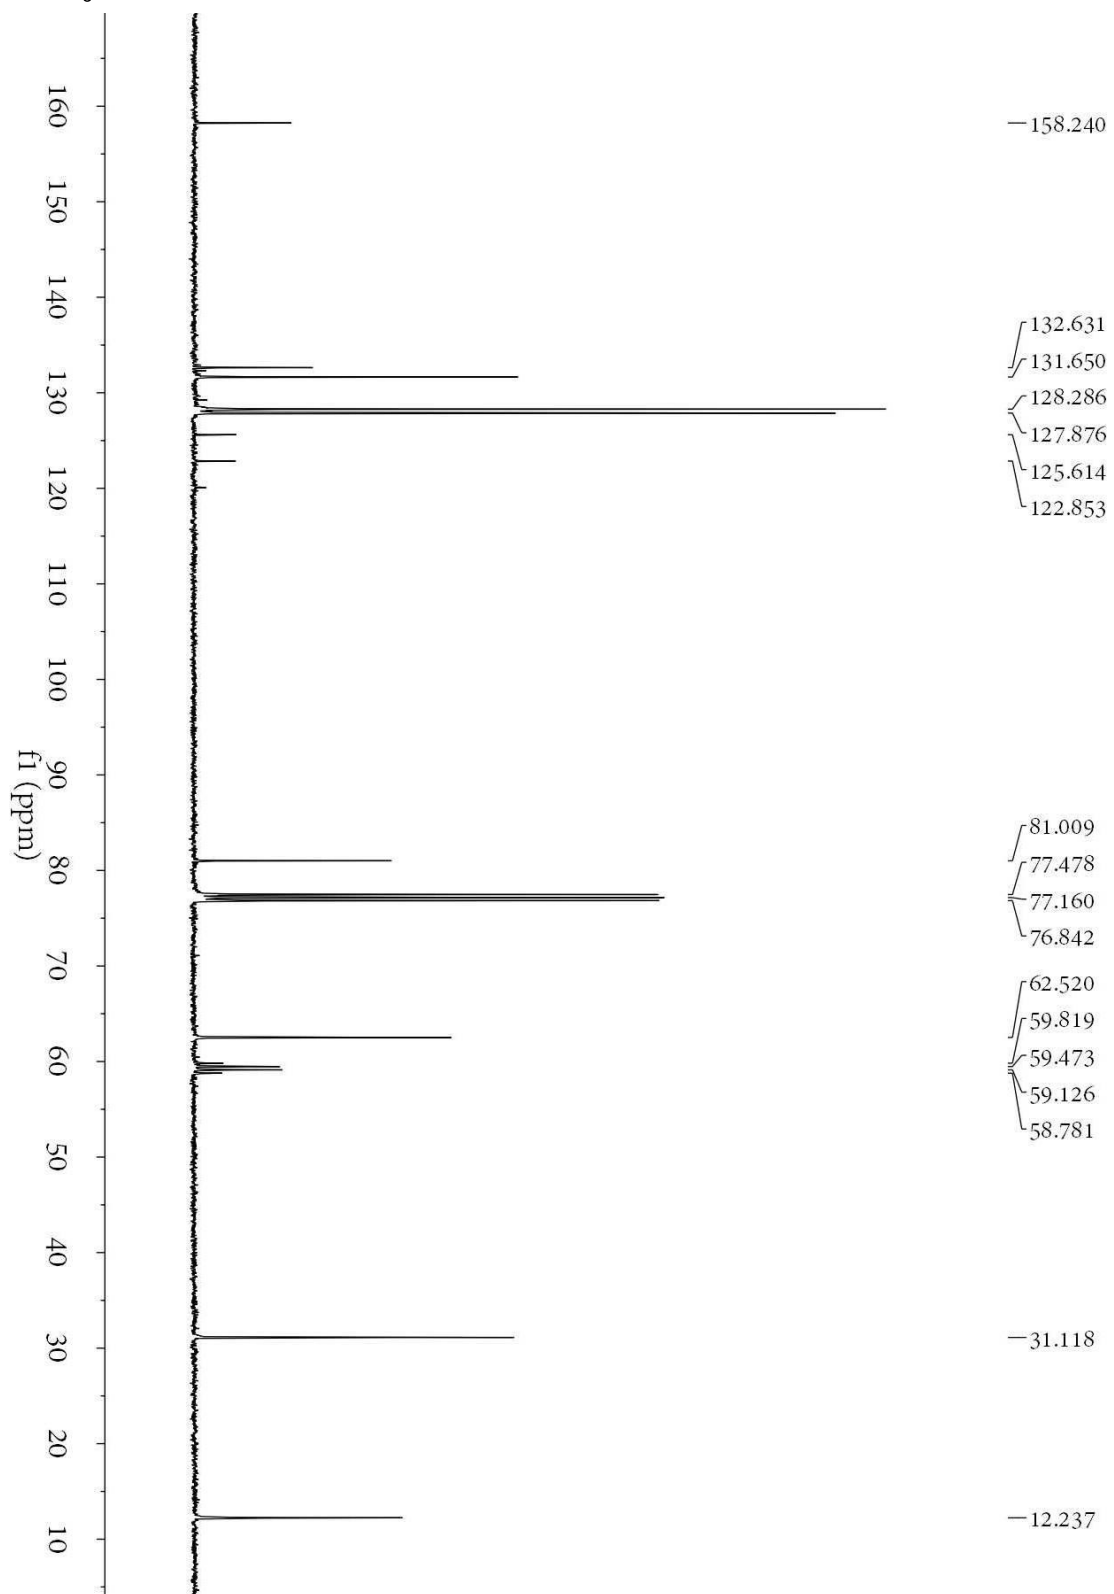

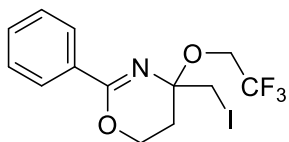

$^{19}\text{F}$  NMR of **5b**, 86%

$\text{CDCl}_3$ , 564 MHz

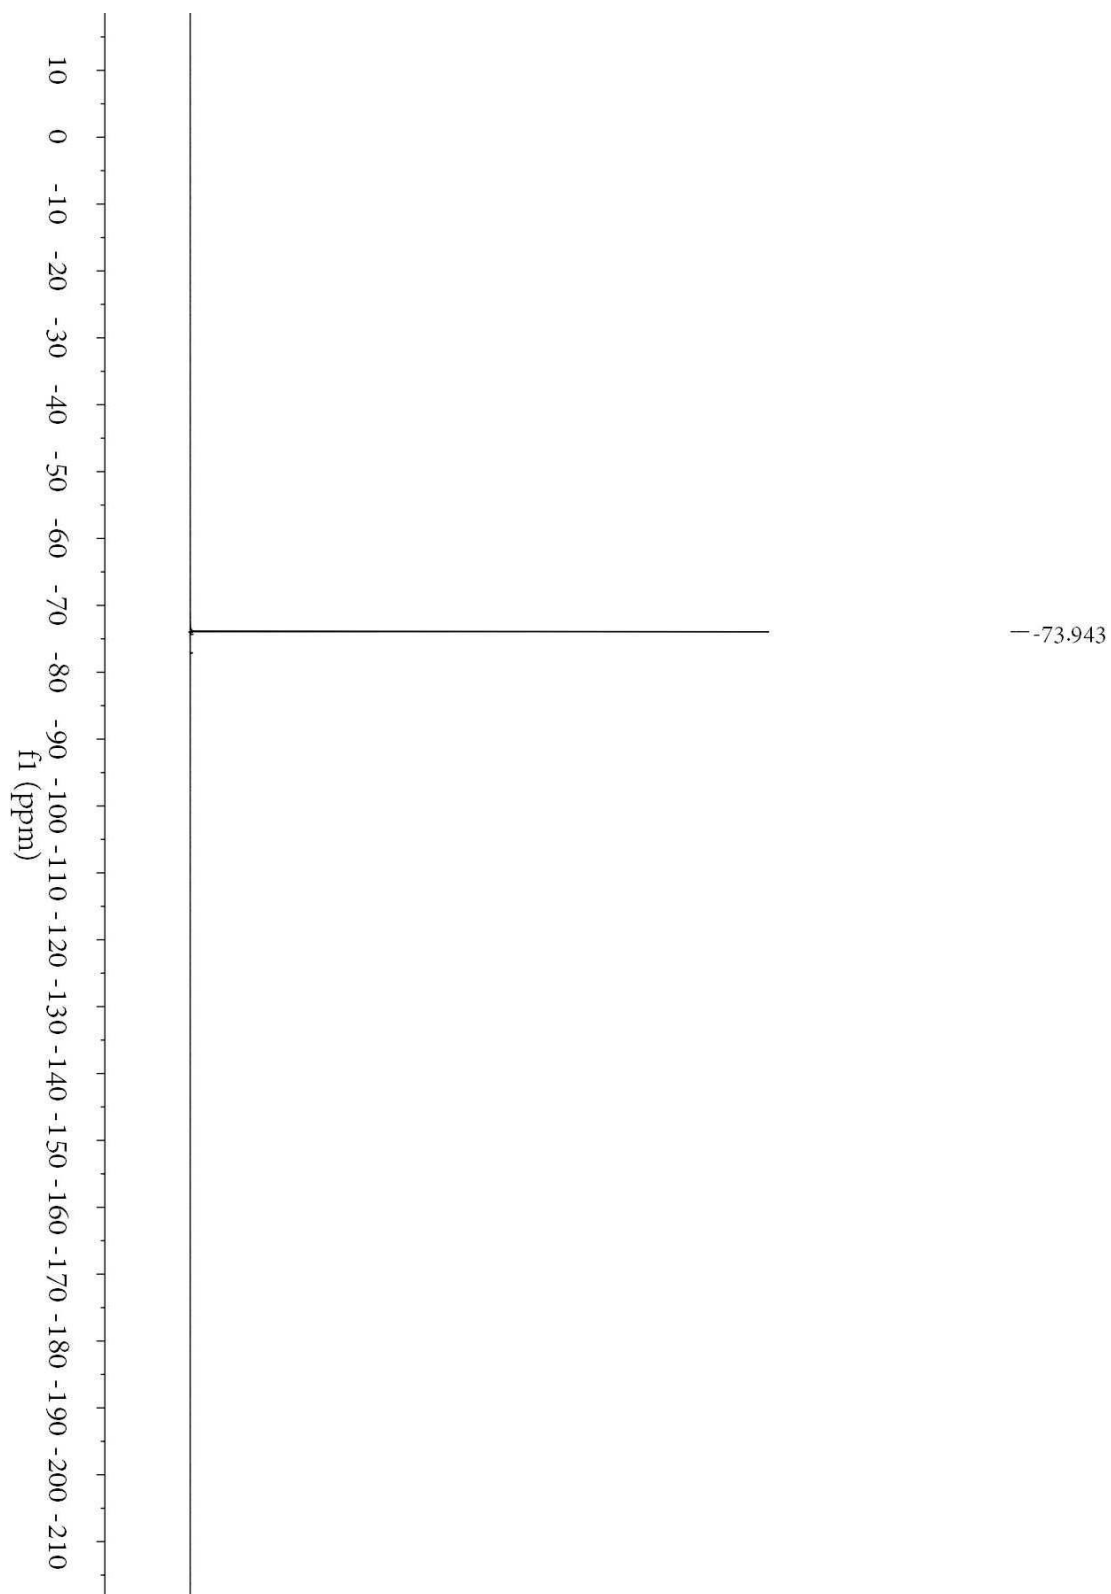



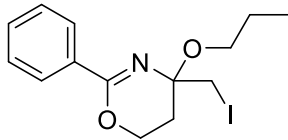

<sup>1</sup>H NMR of **5c**, 76%  
CDCl<sub>3</sub>, 400 MHz

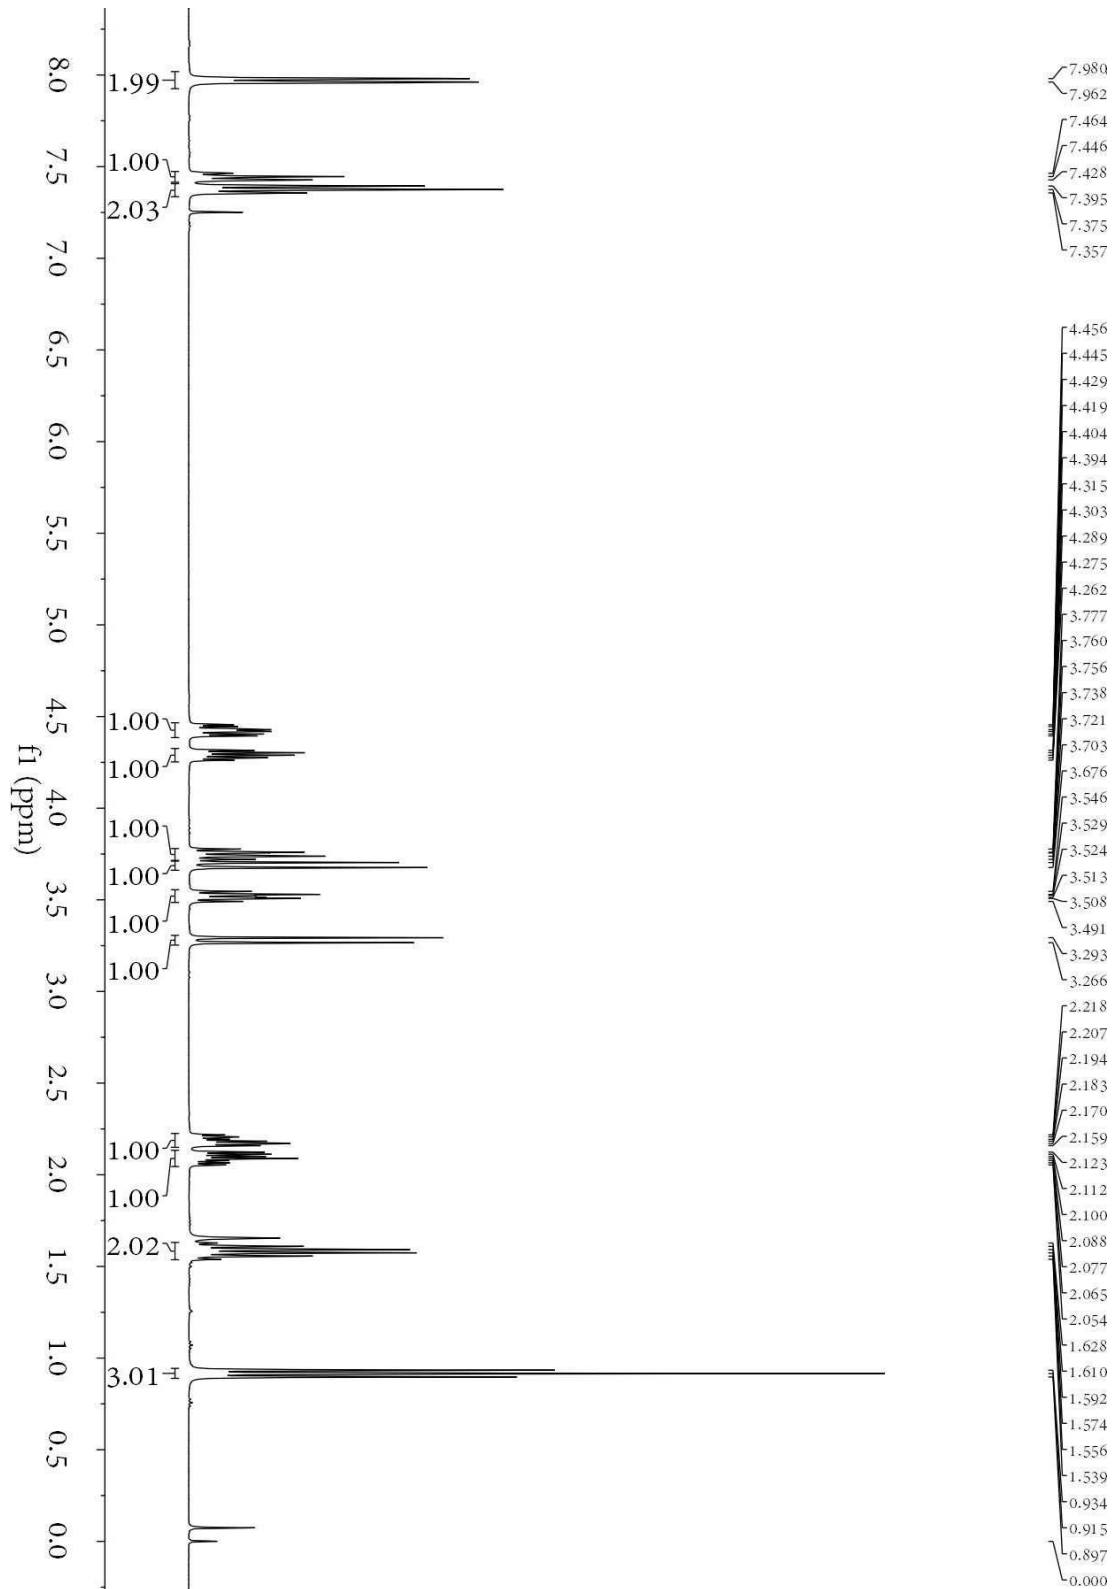

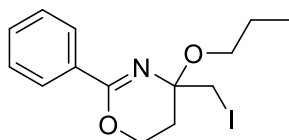

$^{13}\text{C}$  NMR of **5c**, 76%

$\text{CDCl}_3$ , 100 MHz

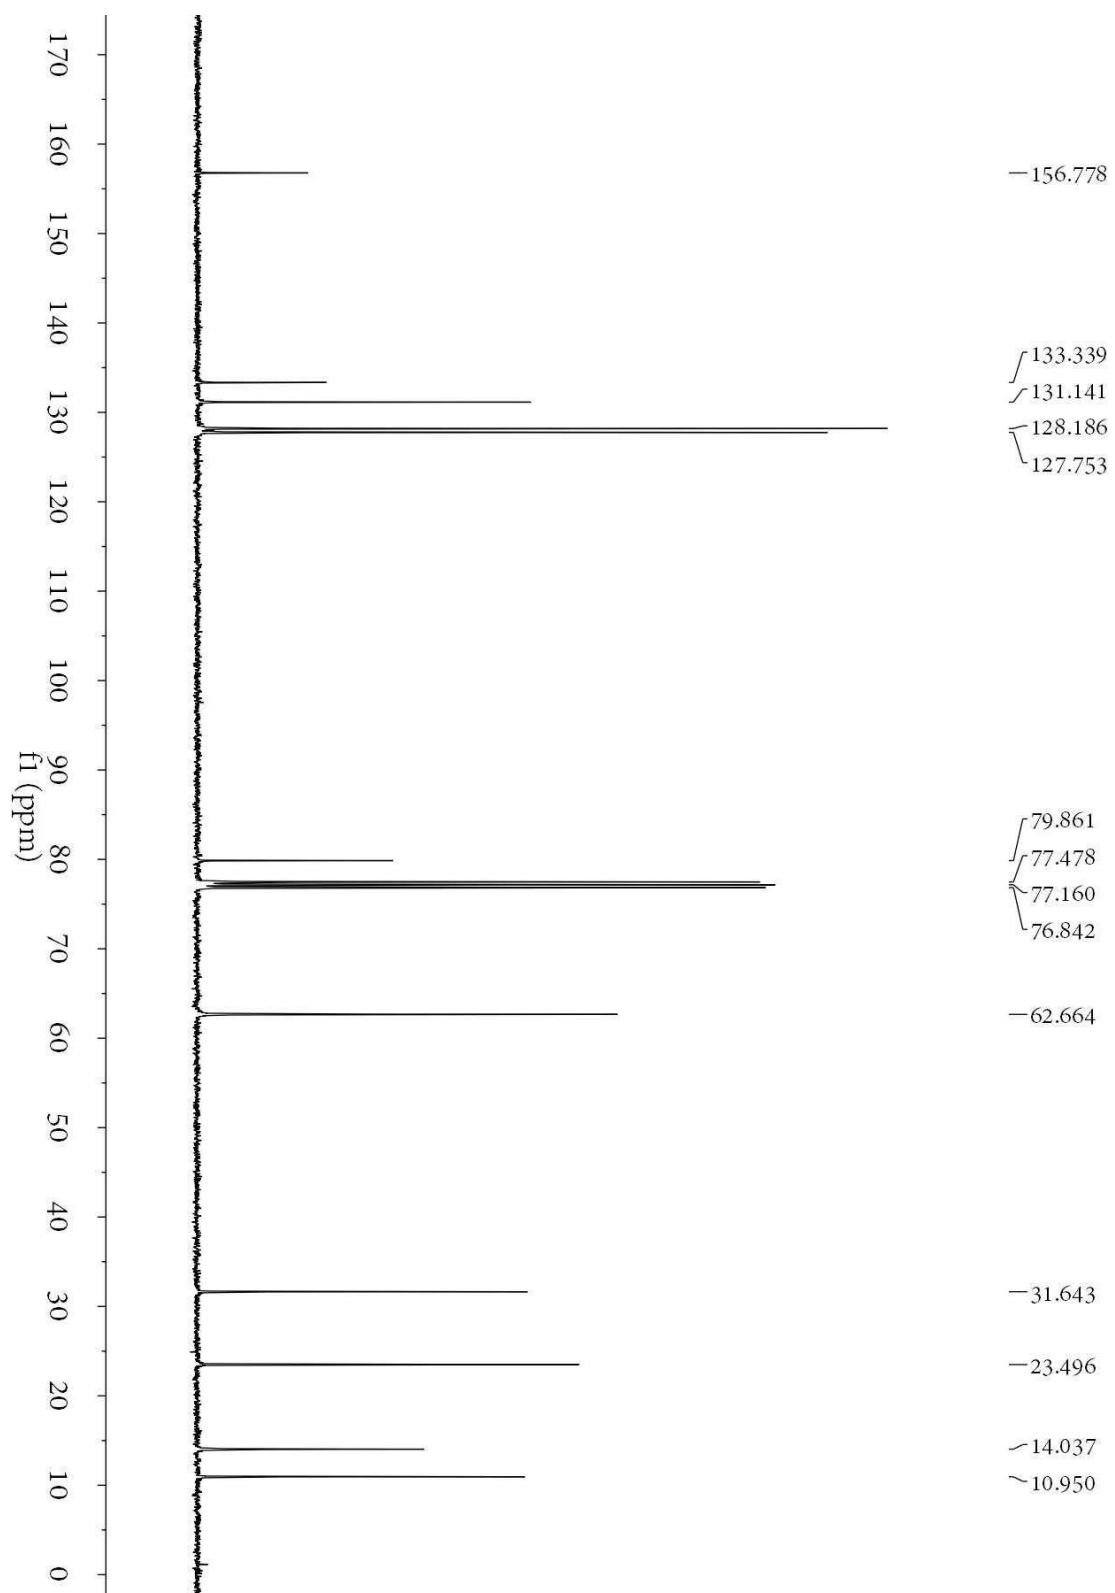

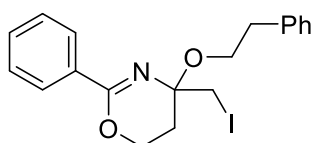

<sup>1</sup>H NMR of **5d**, 70%

CDCl<sub>3</sub>, 400 MHz

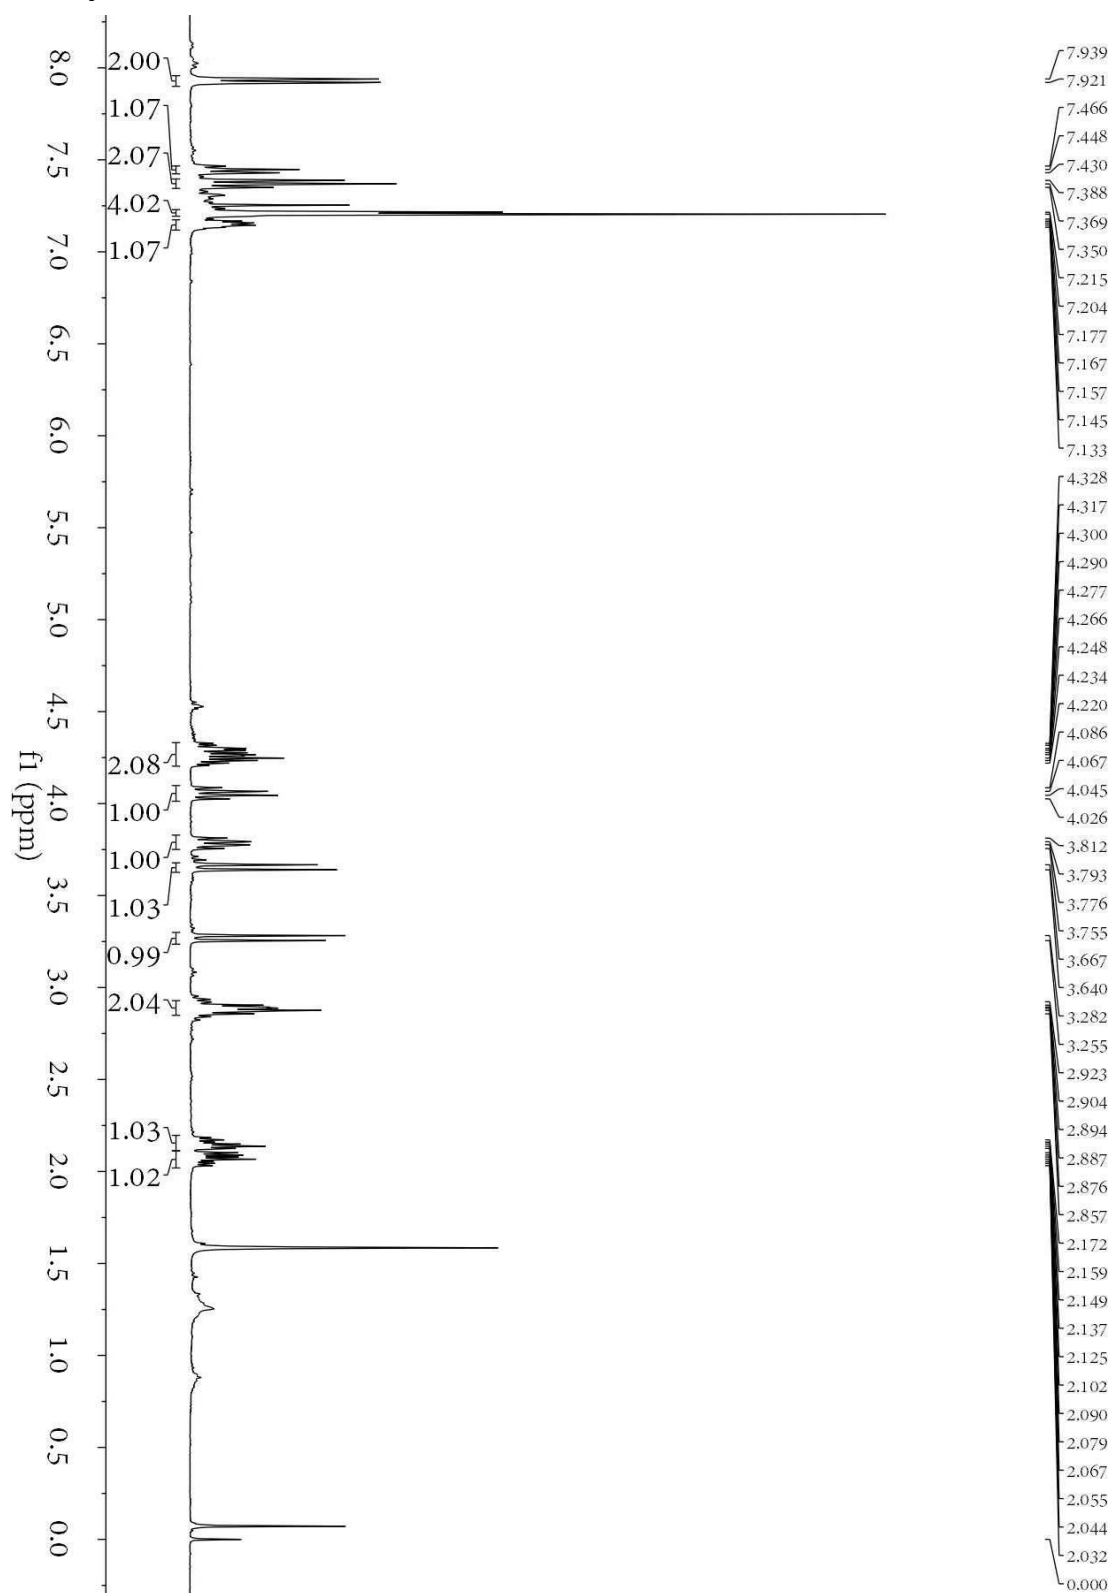

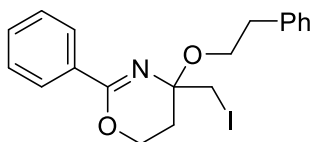

$^{13}\text{C}$  NMR of **5d**, 70%  
 $\text{CDCl}_3$ , 100 MHz

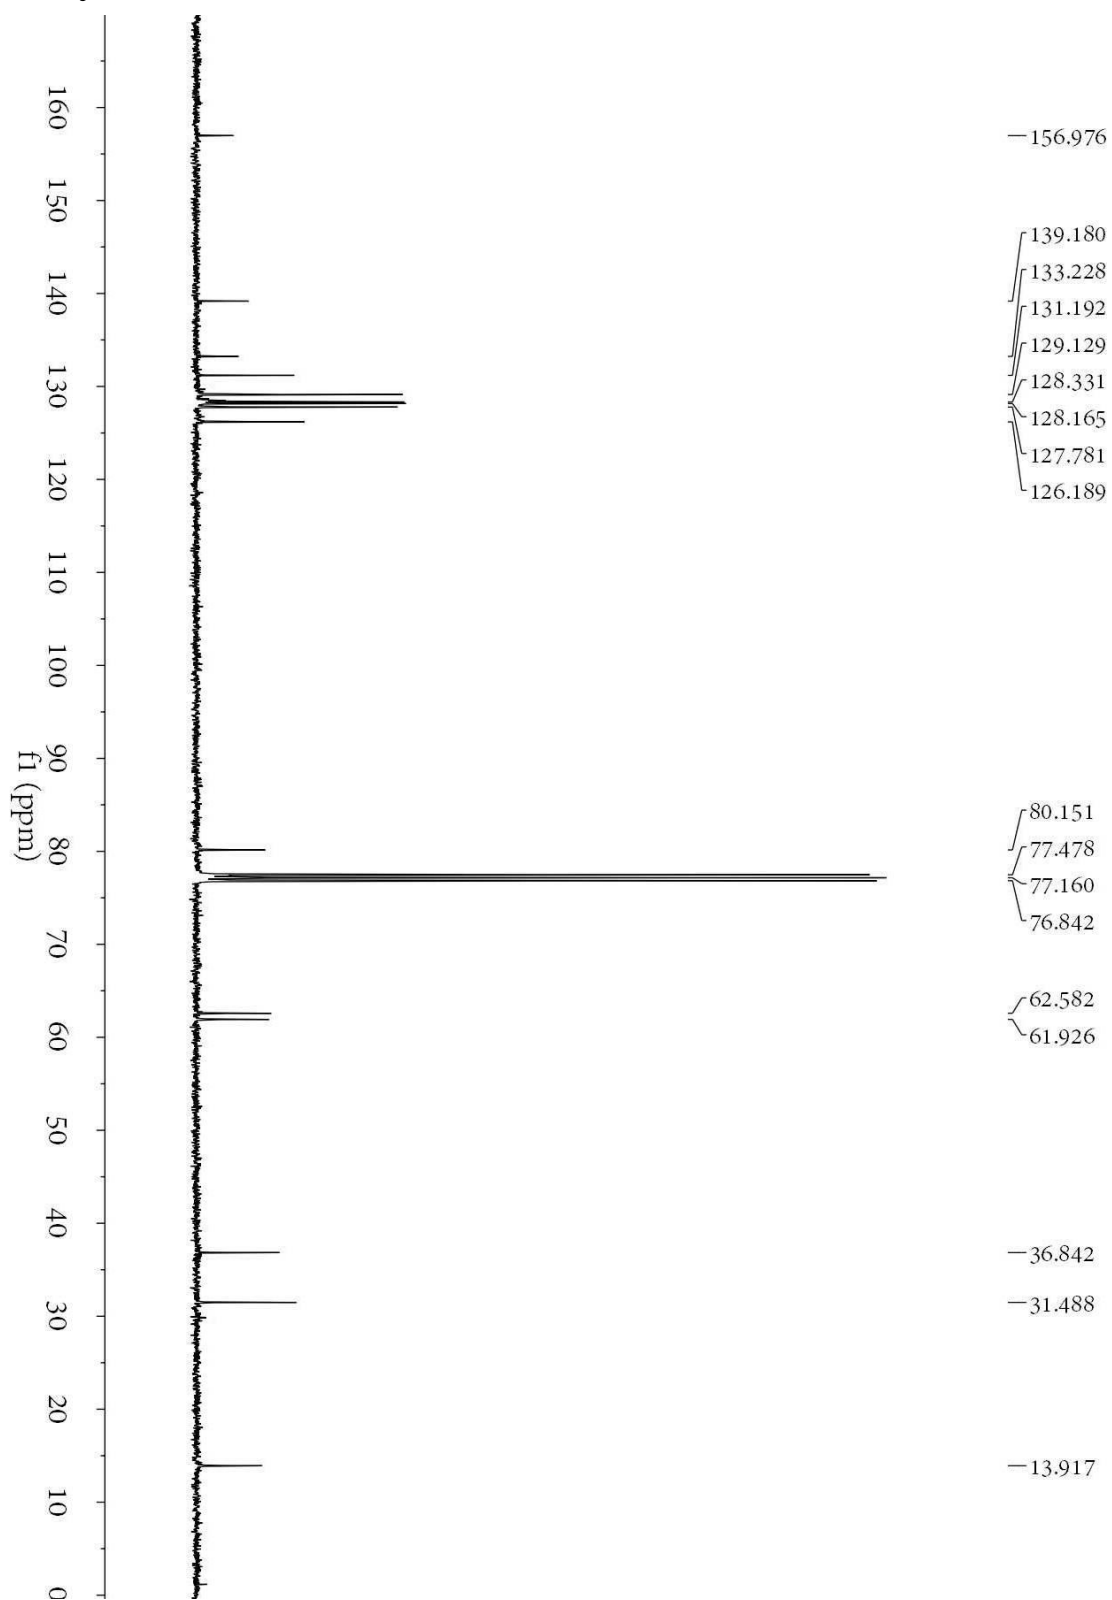

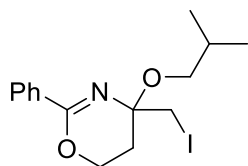

$^1\text{H}$  NMR of **5e**, 69%

$\text{CDCl}_3$ , 400 MHz

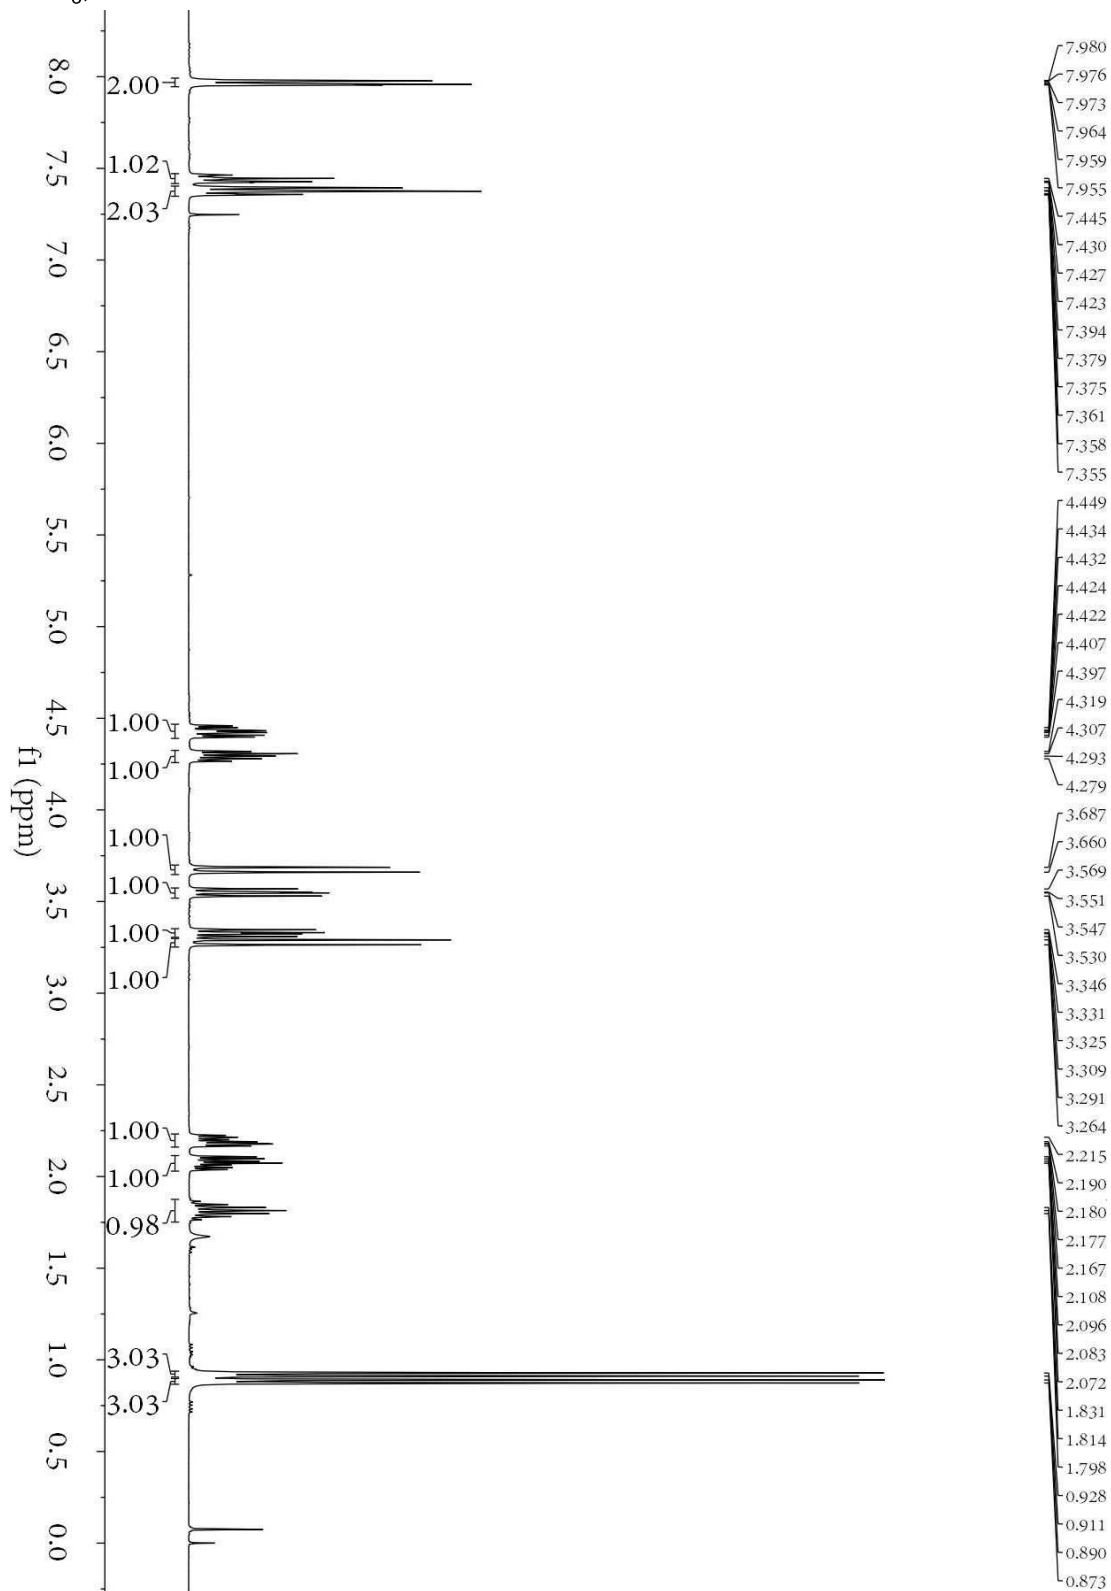

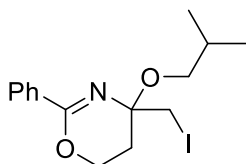

$^{13}\text{C}$  NMR of **5e**, 69%

$\text{CDCl}_3$ , 100 MHz

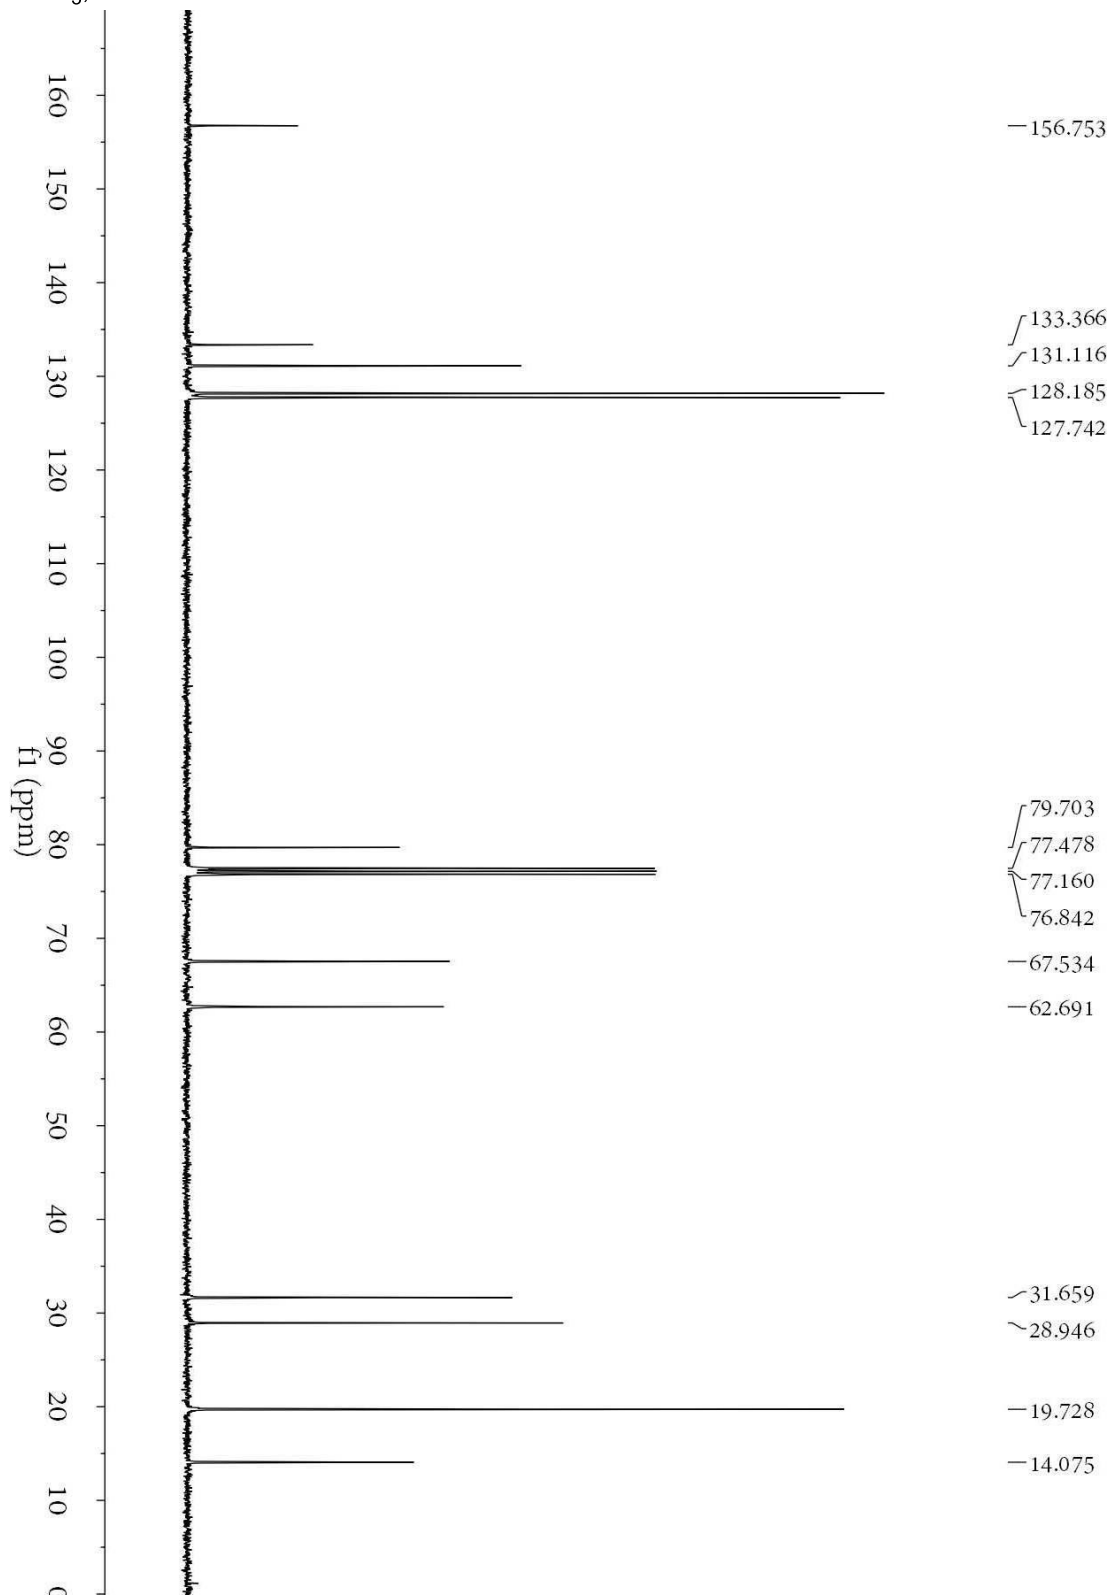



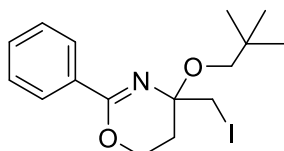

$^{13}\text{C}$  NMR of **5f**, 71%  
 $\text{CDCl}_3$ , 100 MHz

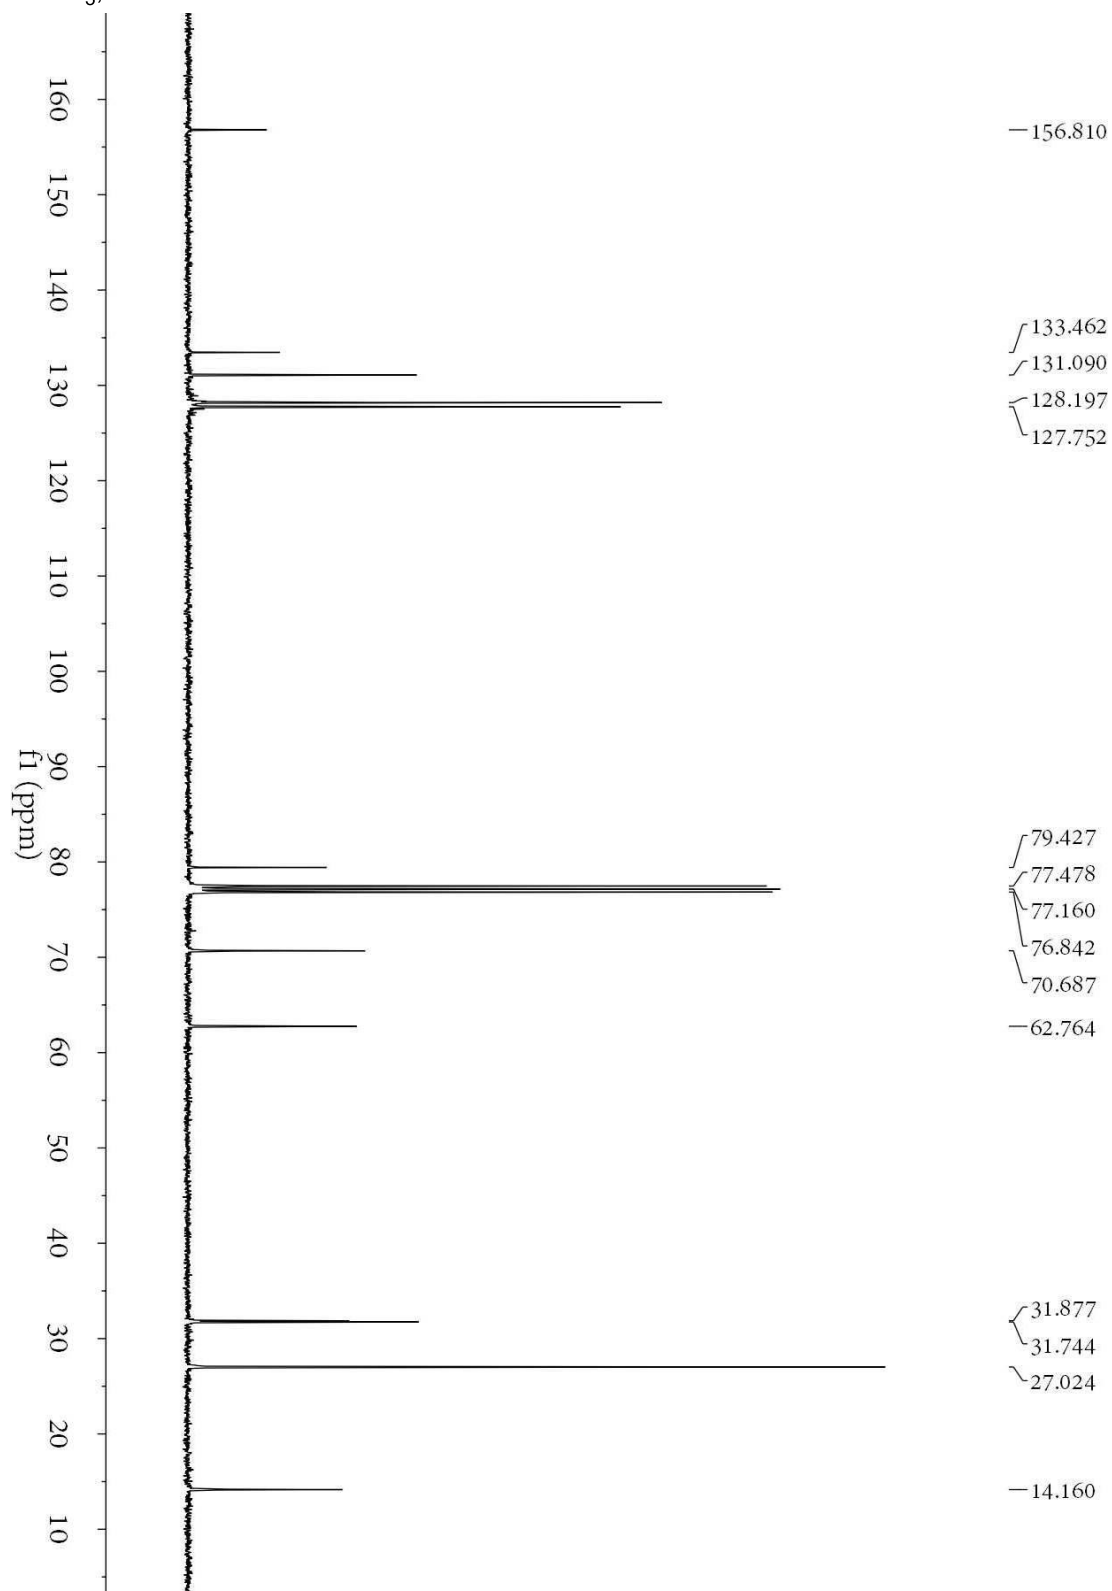



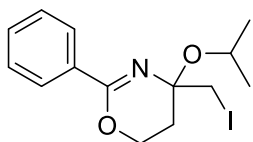

<sup>1</sup>H NMR of **5g**, 58%

CDCl<sub>3</sub>, 400 MHz

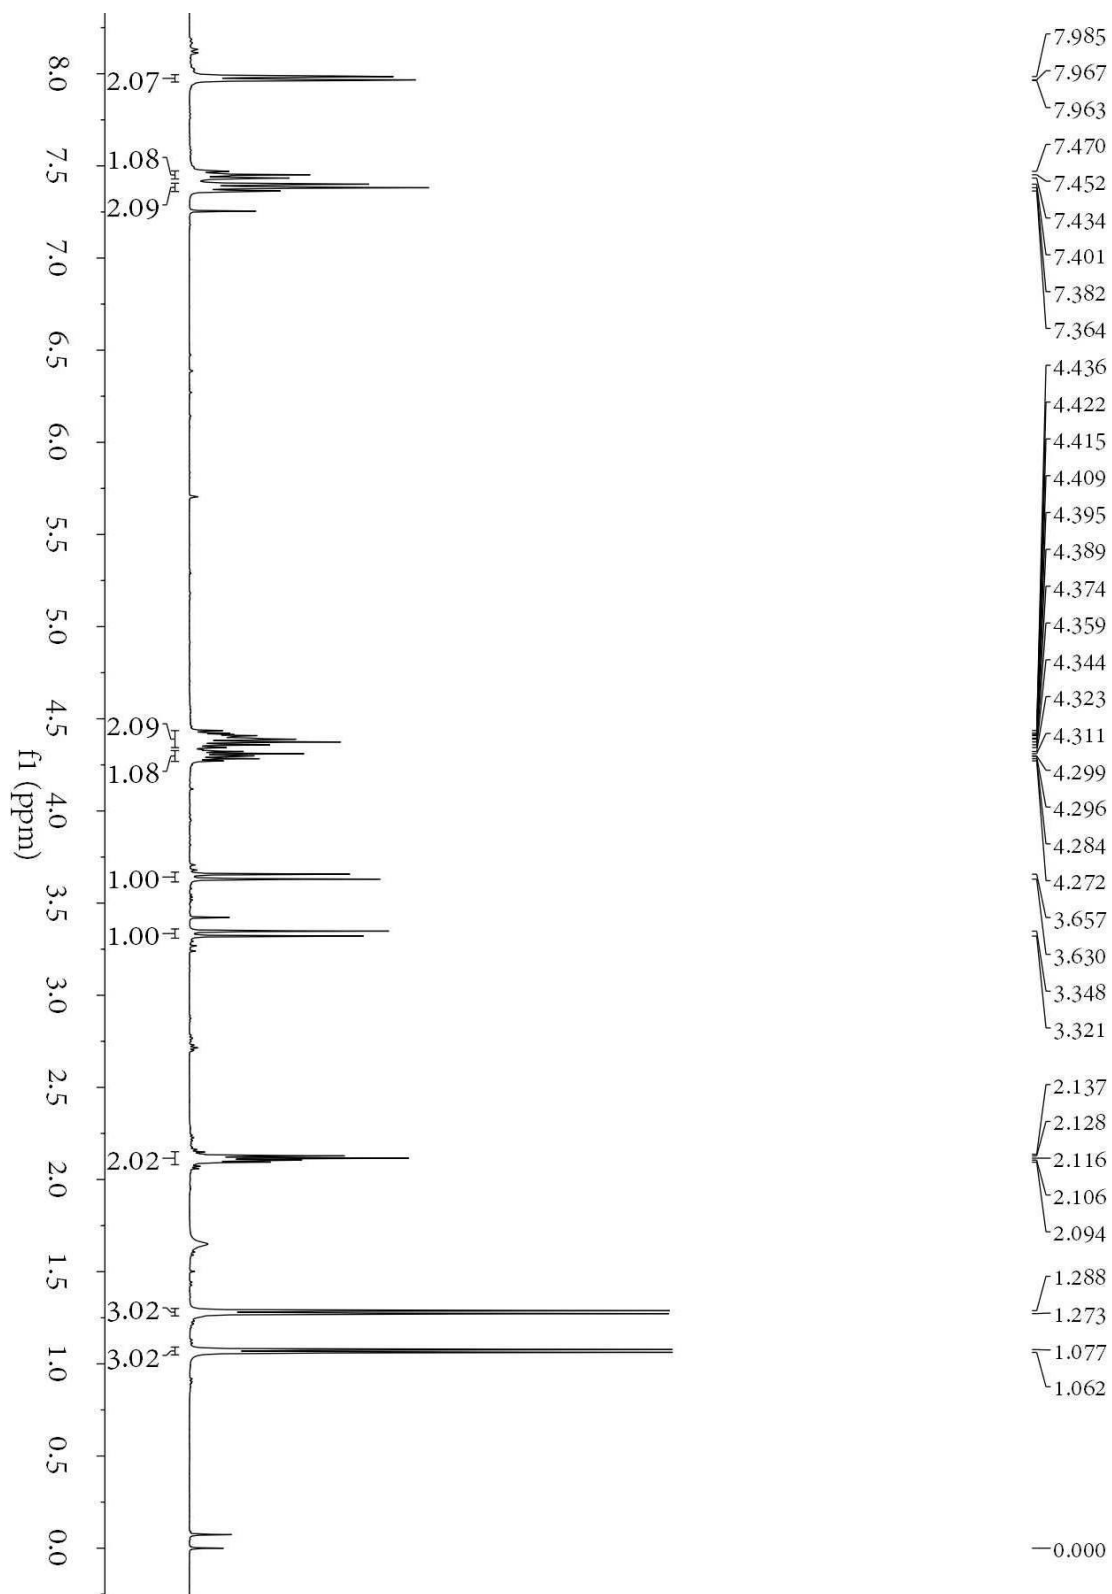

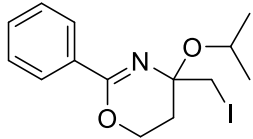

$^{13}\text{C}$  NMR of **5g**, 58%  
 $\text{CDCl}_3$ , 100 MHz

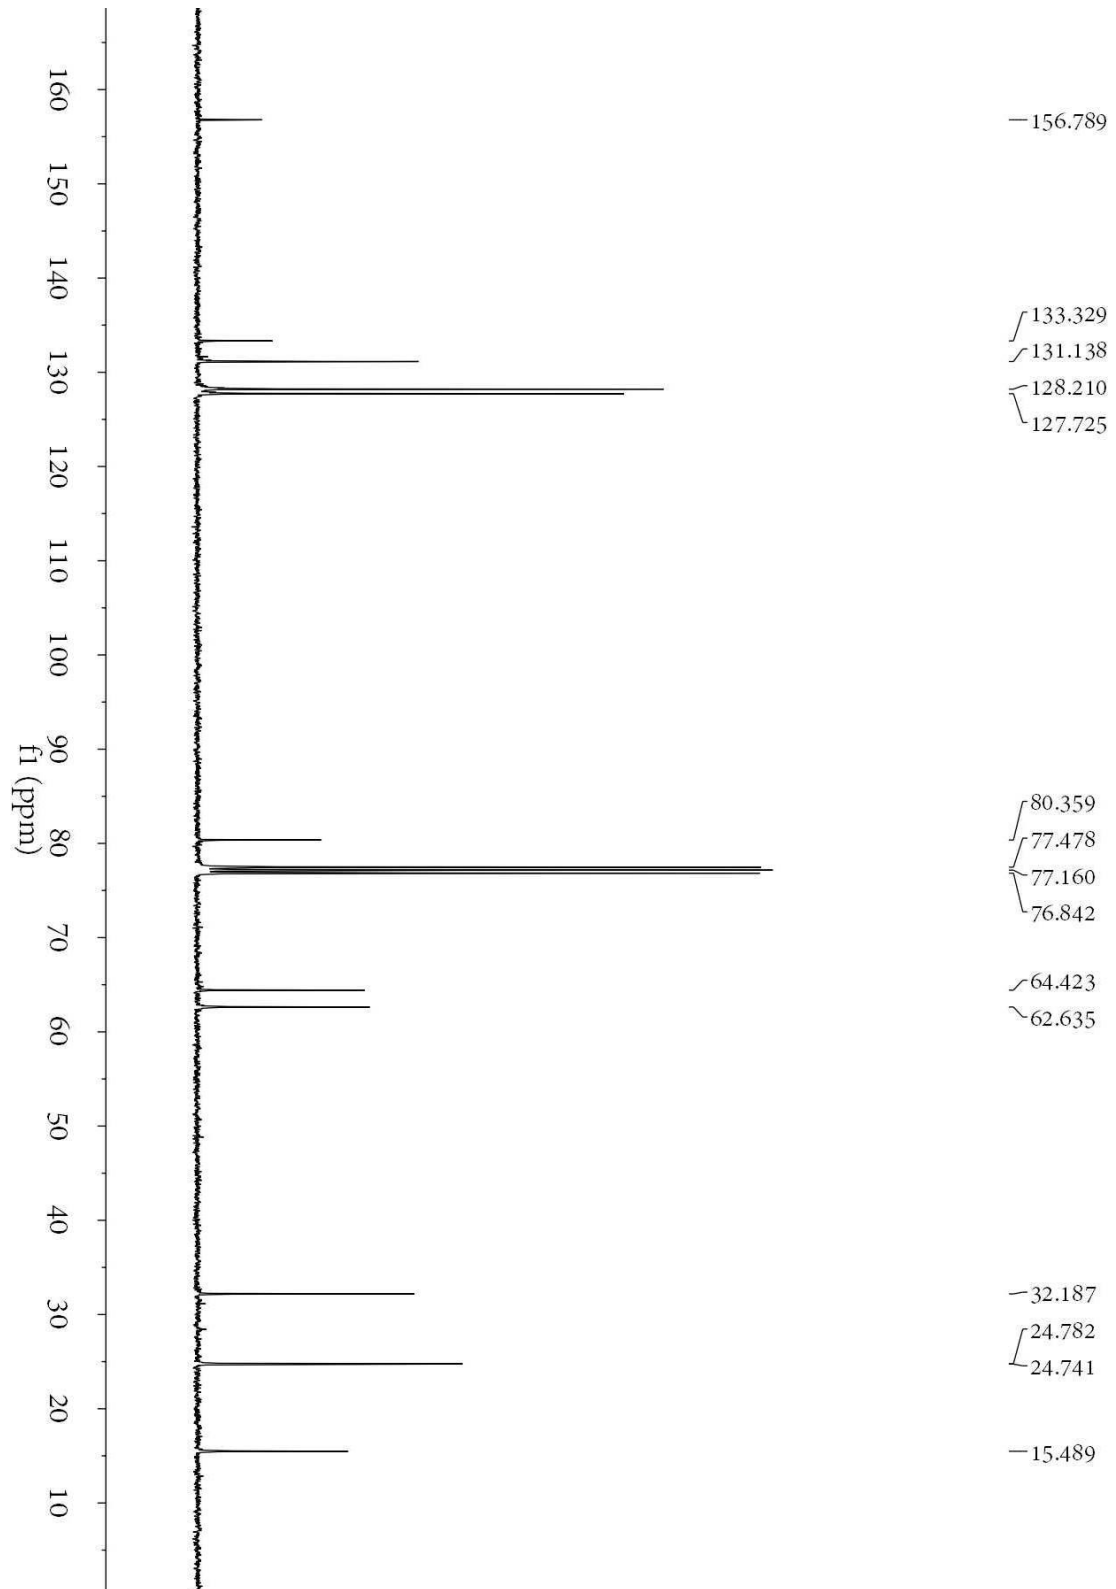

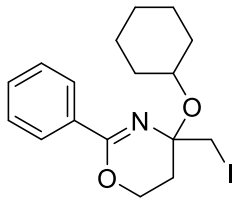

$^1\text{H}$  NMR of **5h**, 60%

$\text{CDCl}_3$ , 400 MHz

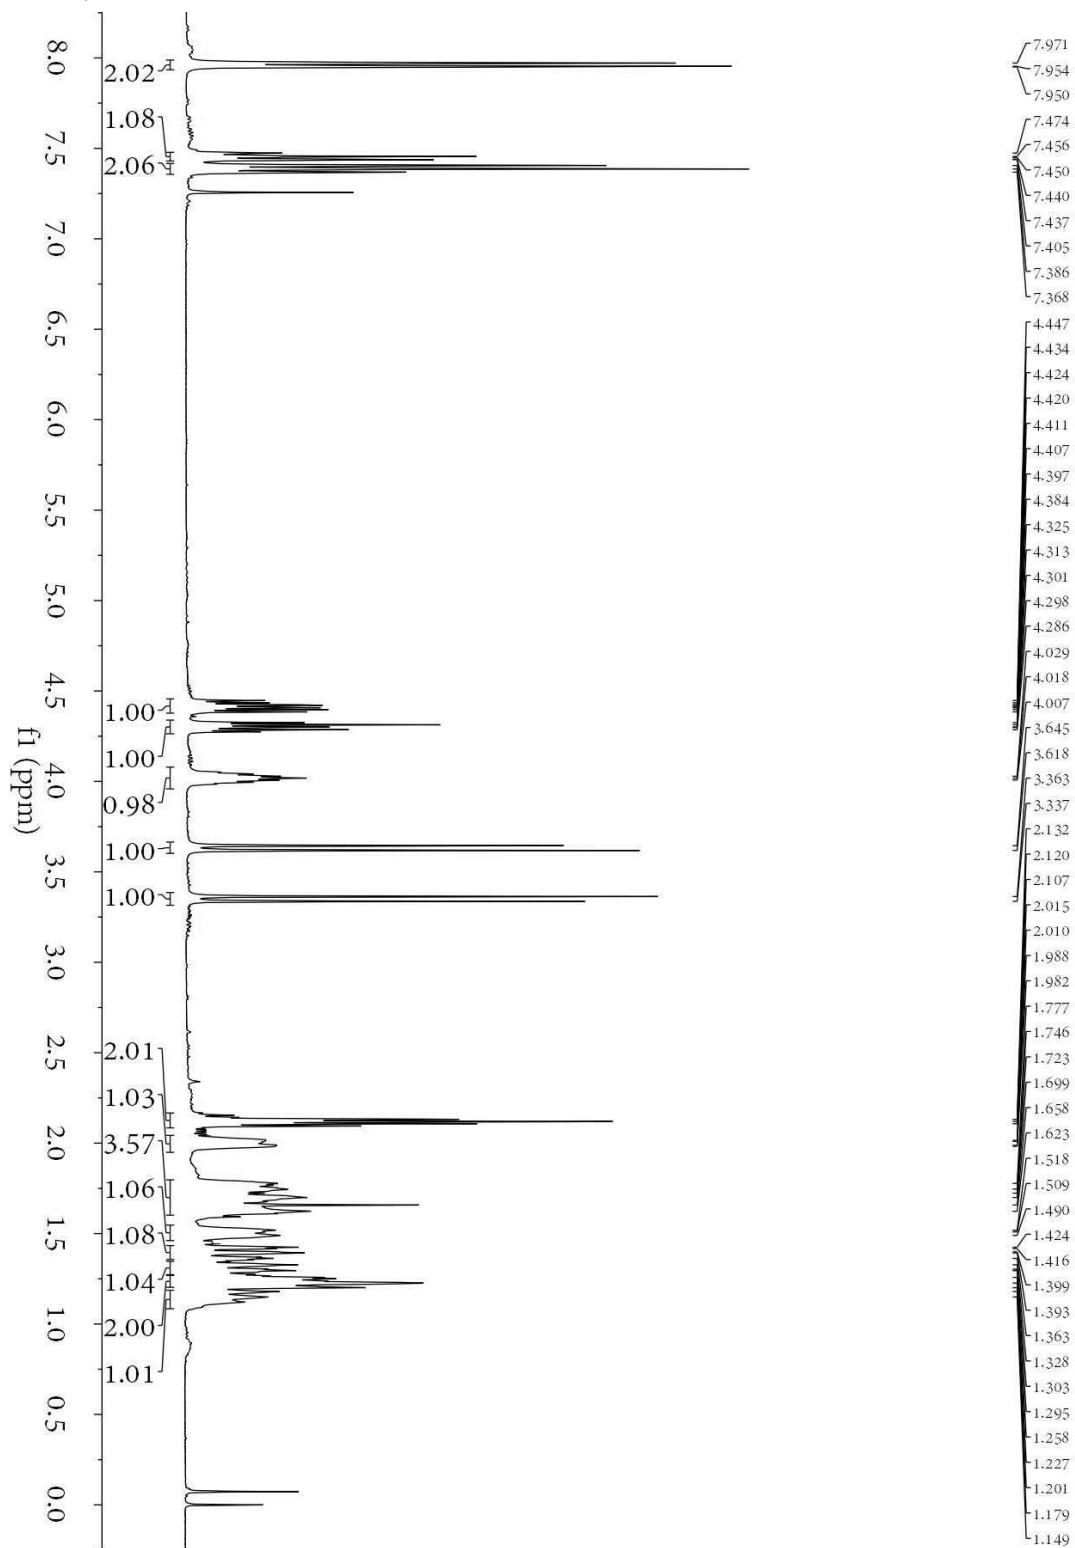

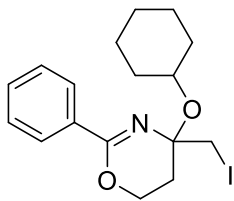

$^{13}\text{C}$  NMR of **5h**, 60%  
 $\text{CDCl}_3$ , 100 MHz

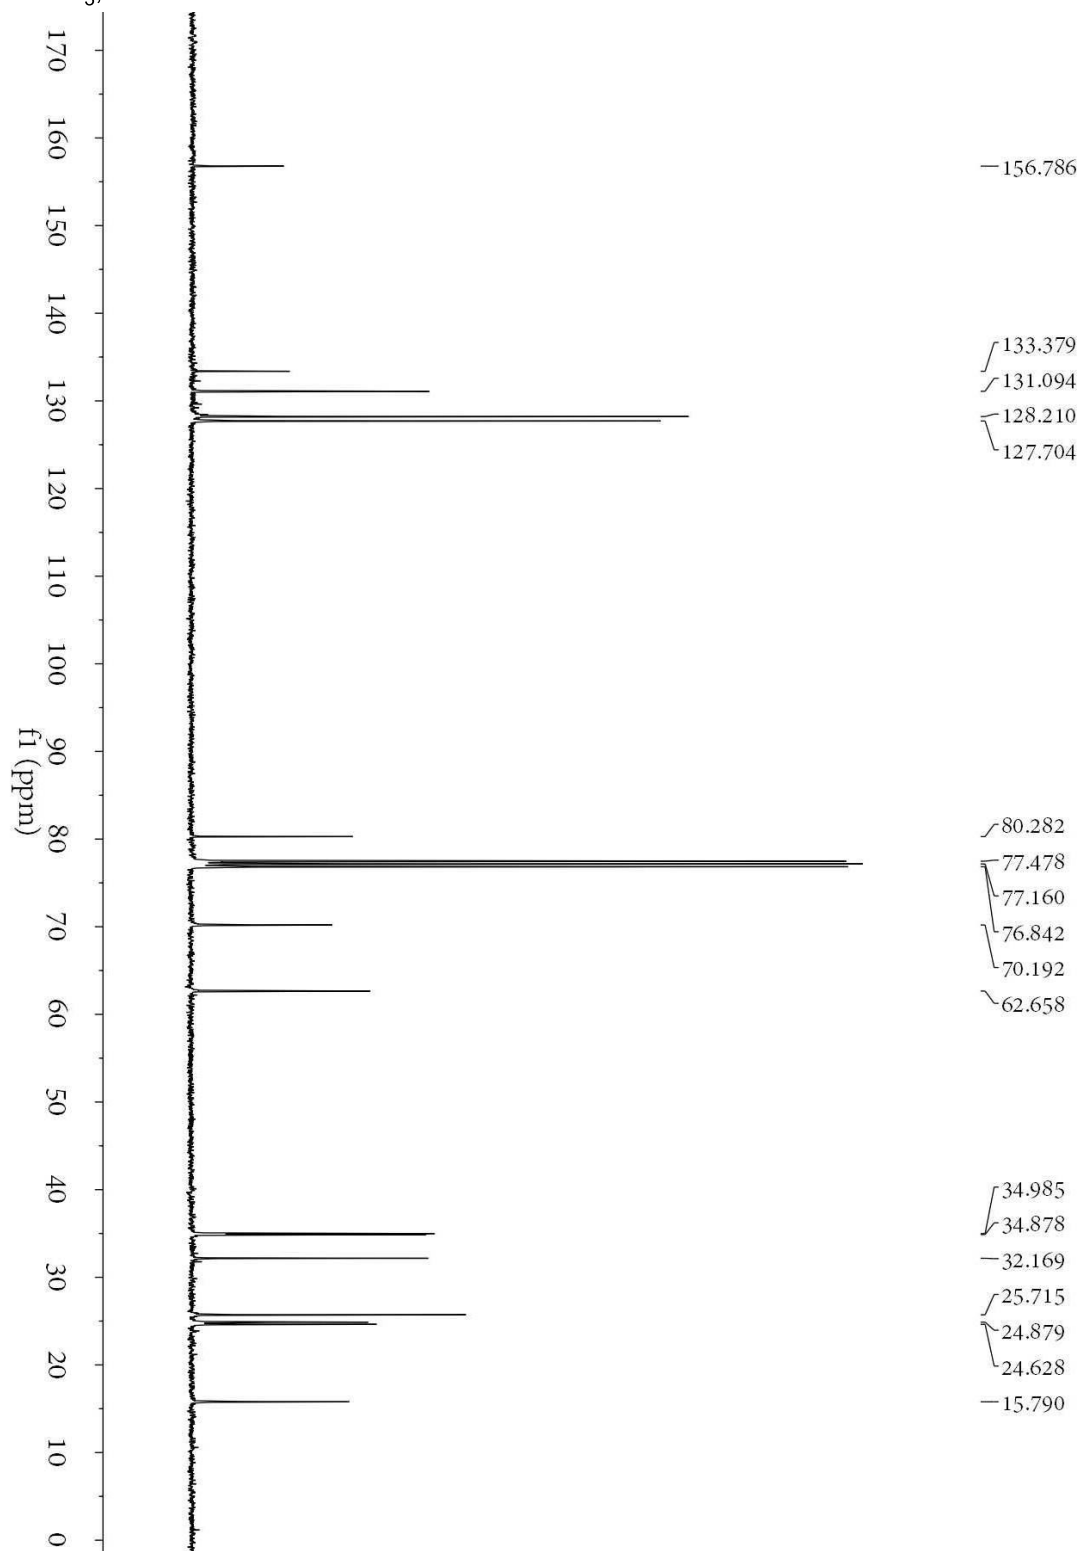

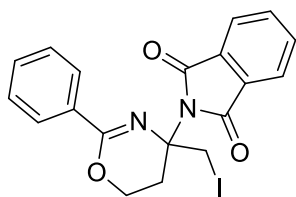

$^1\text{H}$  NMR of **5i**, 26%

$\text{CDCl}_3$ , 400 MHz

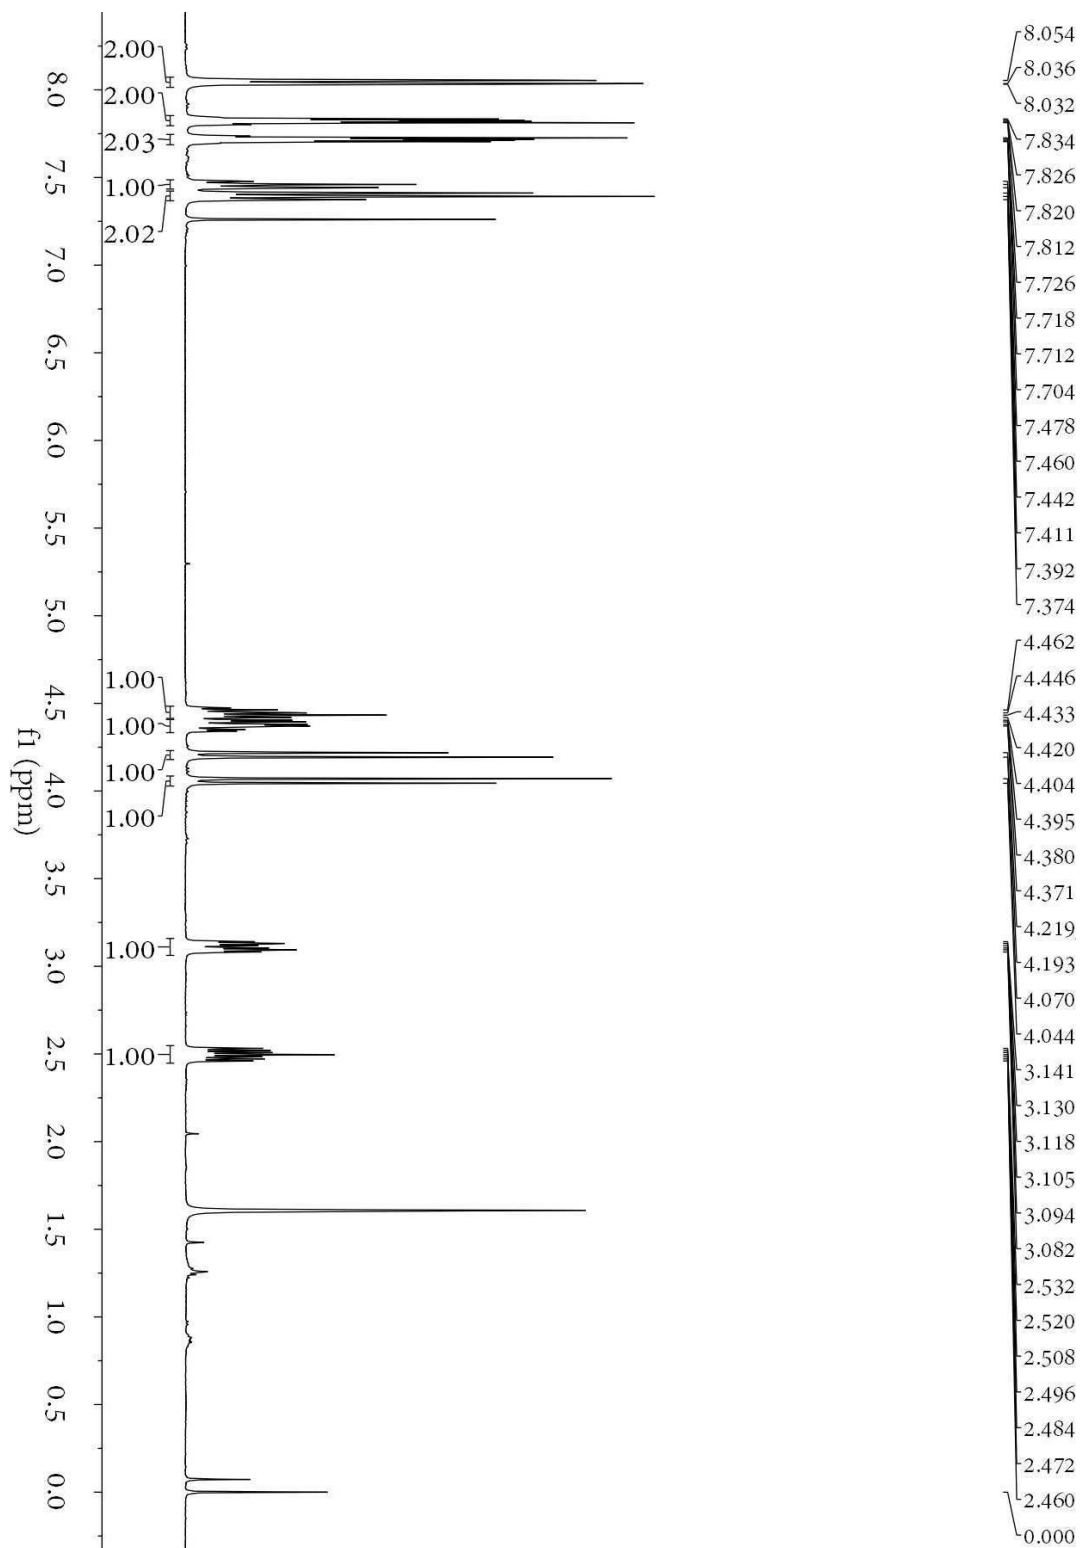

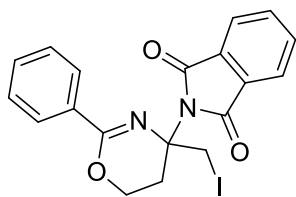

<sup>13</sup>C NMR of **5i**, 26%

CDCl<sub>3</sub>, 100 MHz

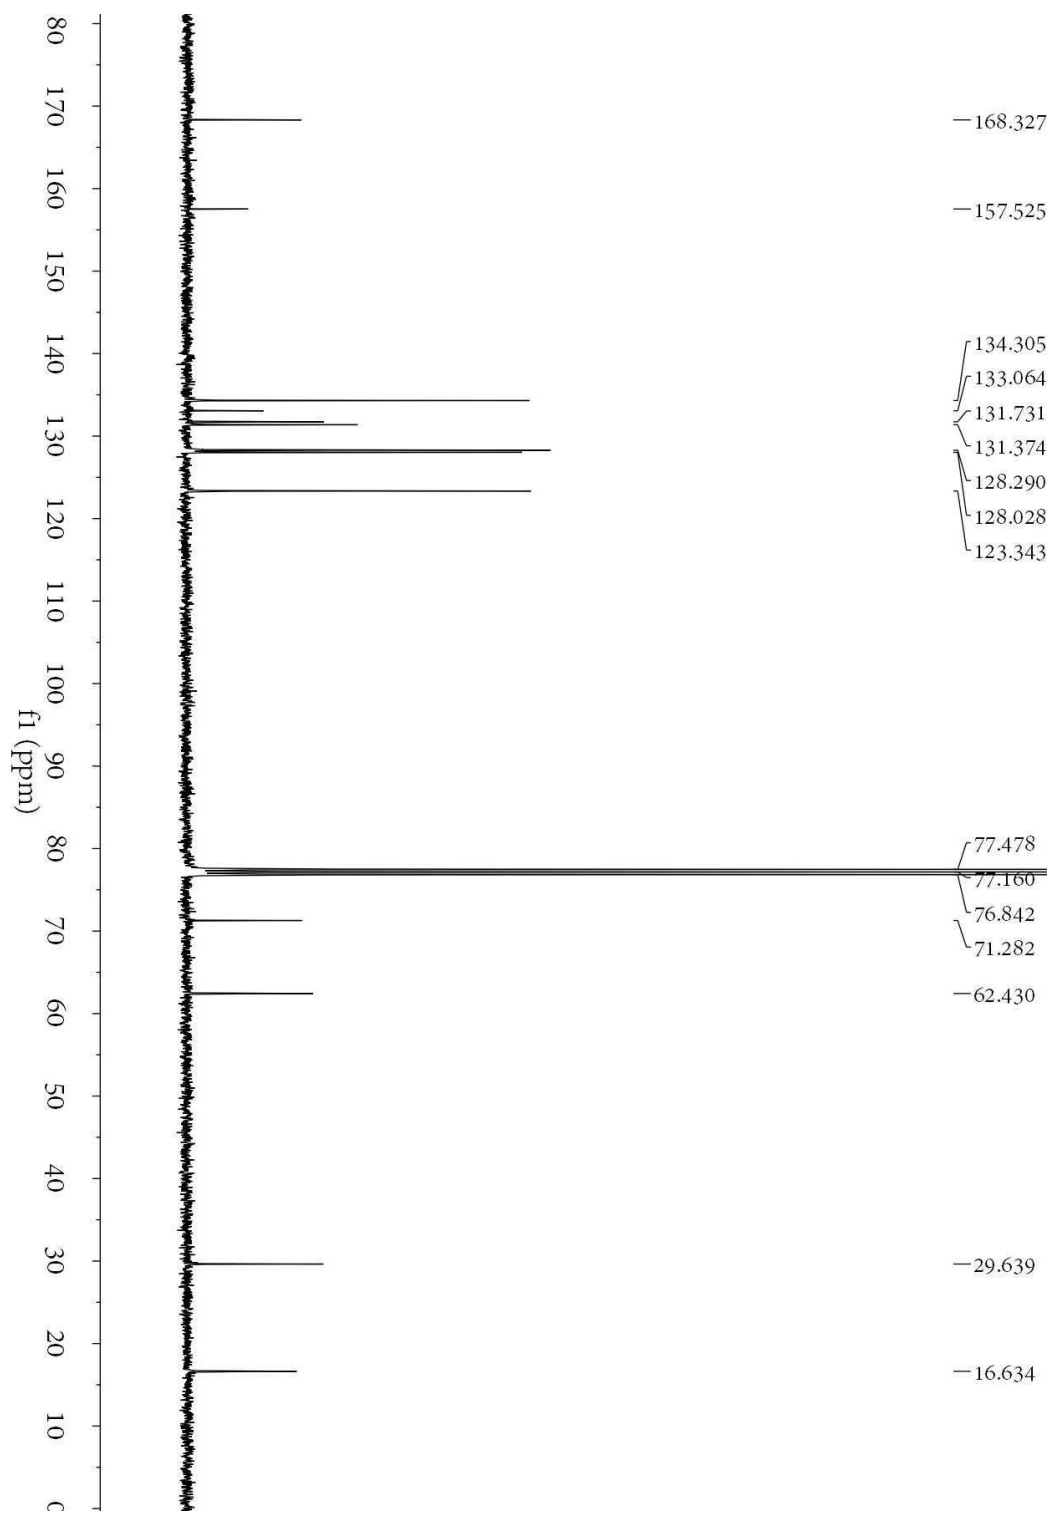

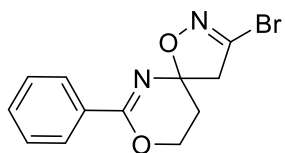

<sup>1</sup>H NMR of **6**, 45%  
CDCl<sub>3</sub>, 400 MHz

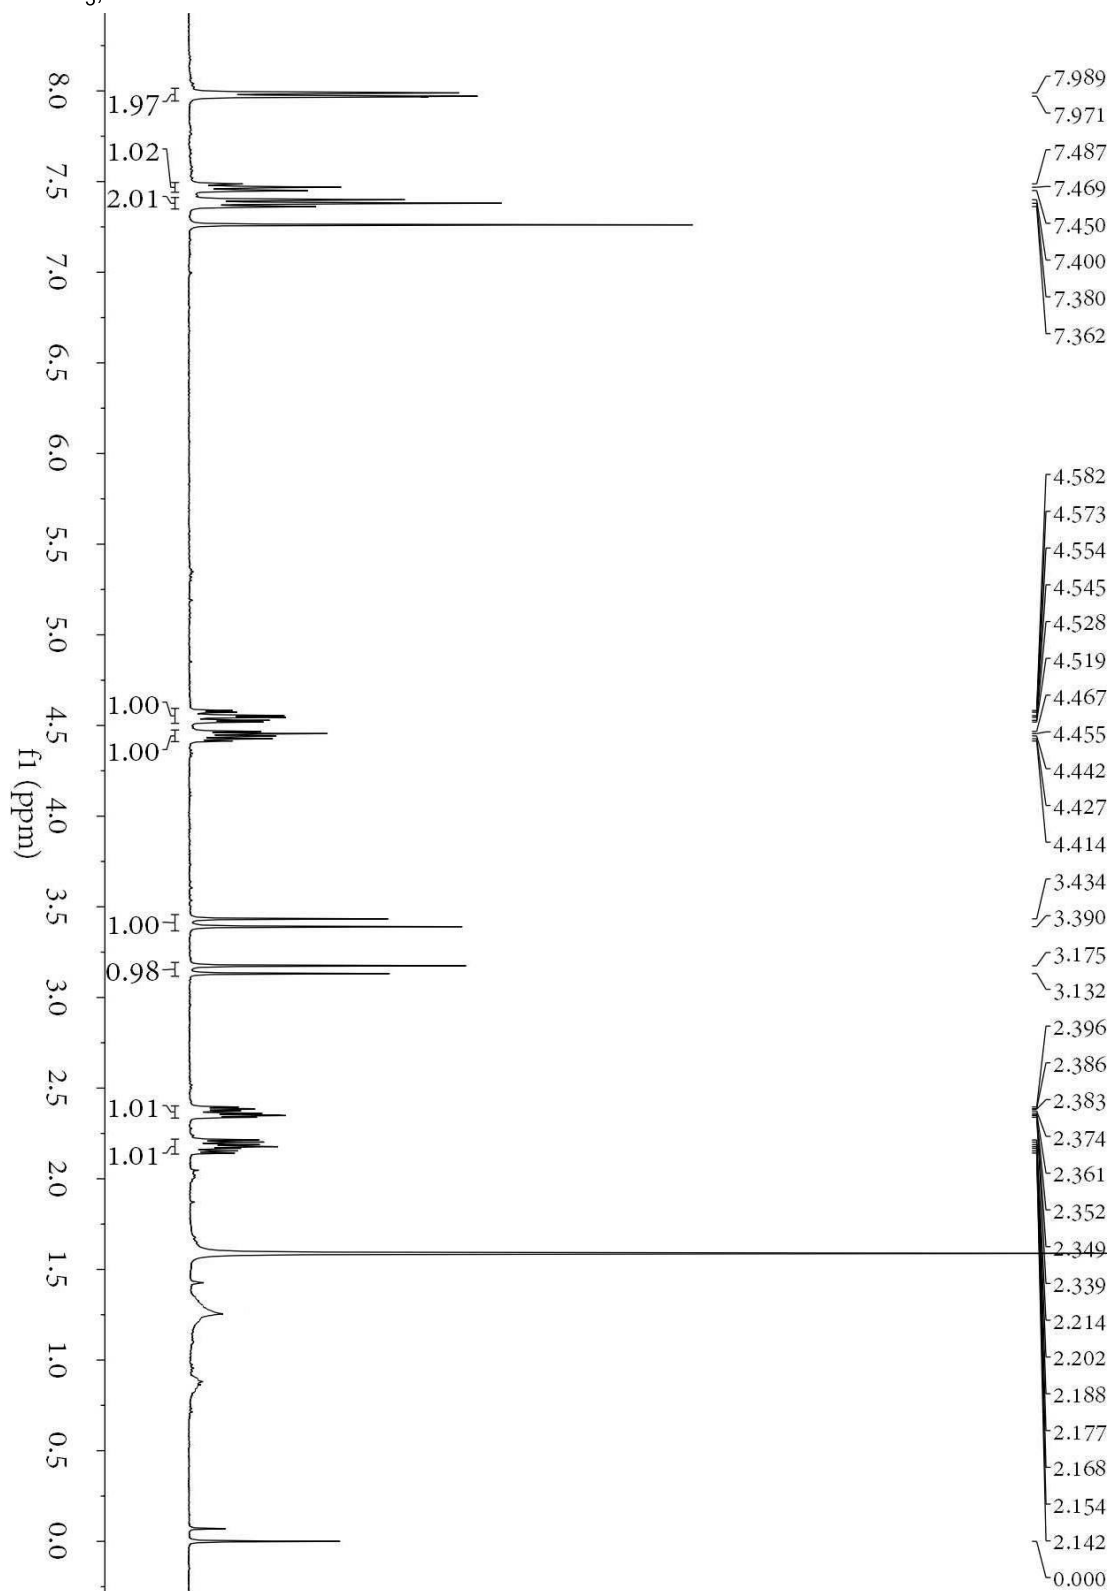

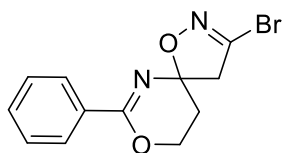

$^{13}\text{C}$  NMR of **6**, 45%  
 $\text{CDCl}_3$ , 100 MHz

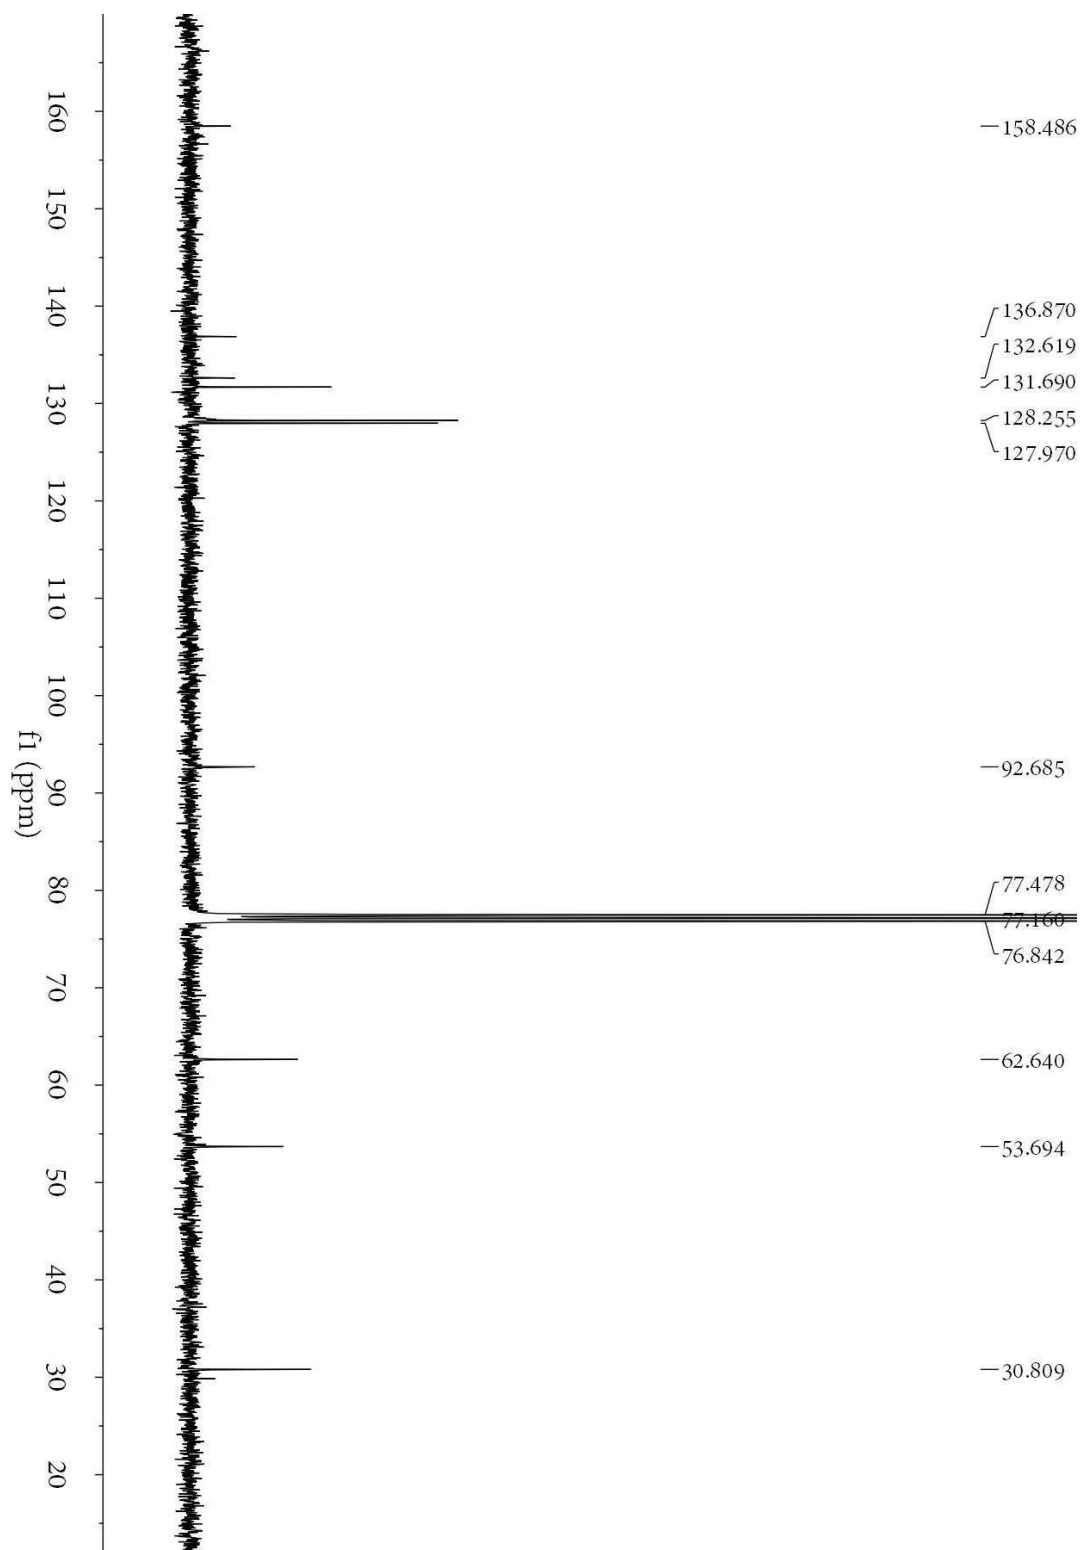



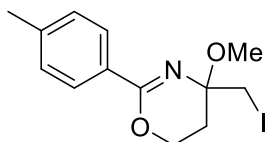

$^1\text{H}$  NMR of **7b**, 75%  
 $\text{CDCl}_3$ , 400 MHz

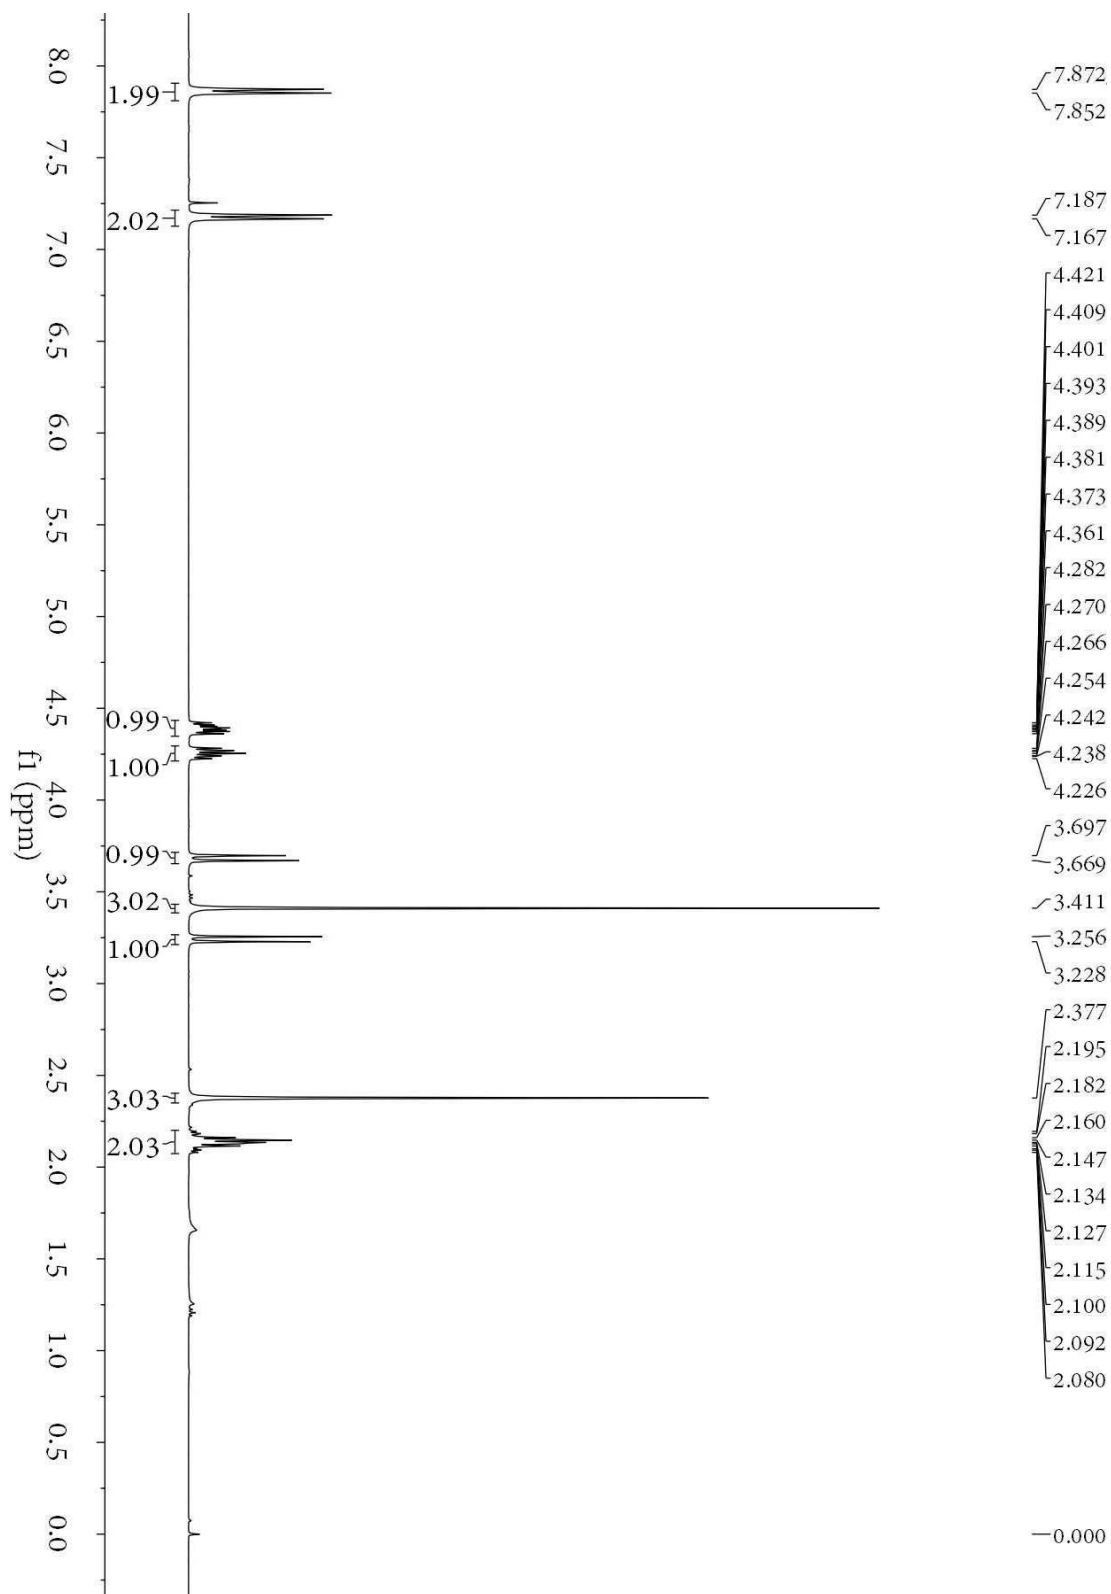

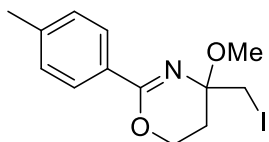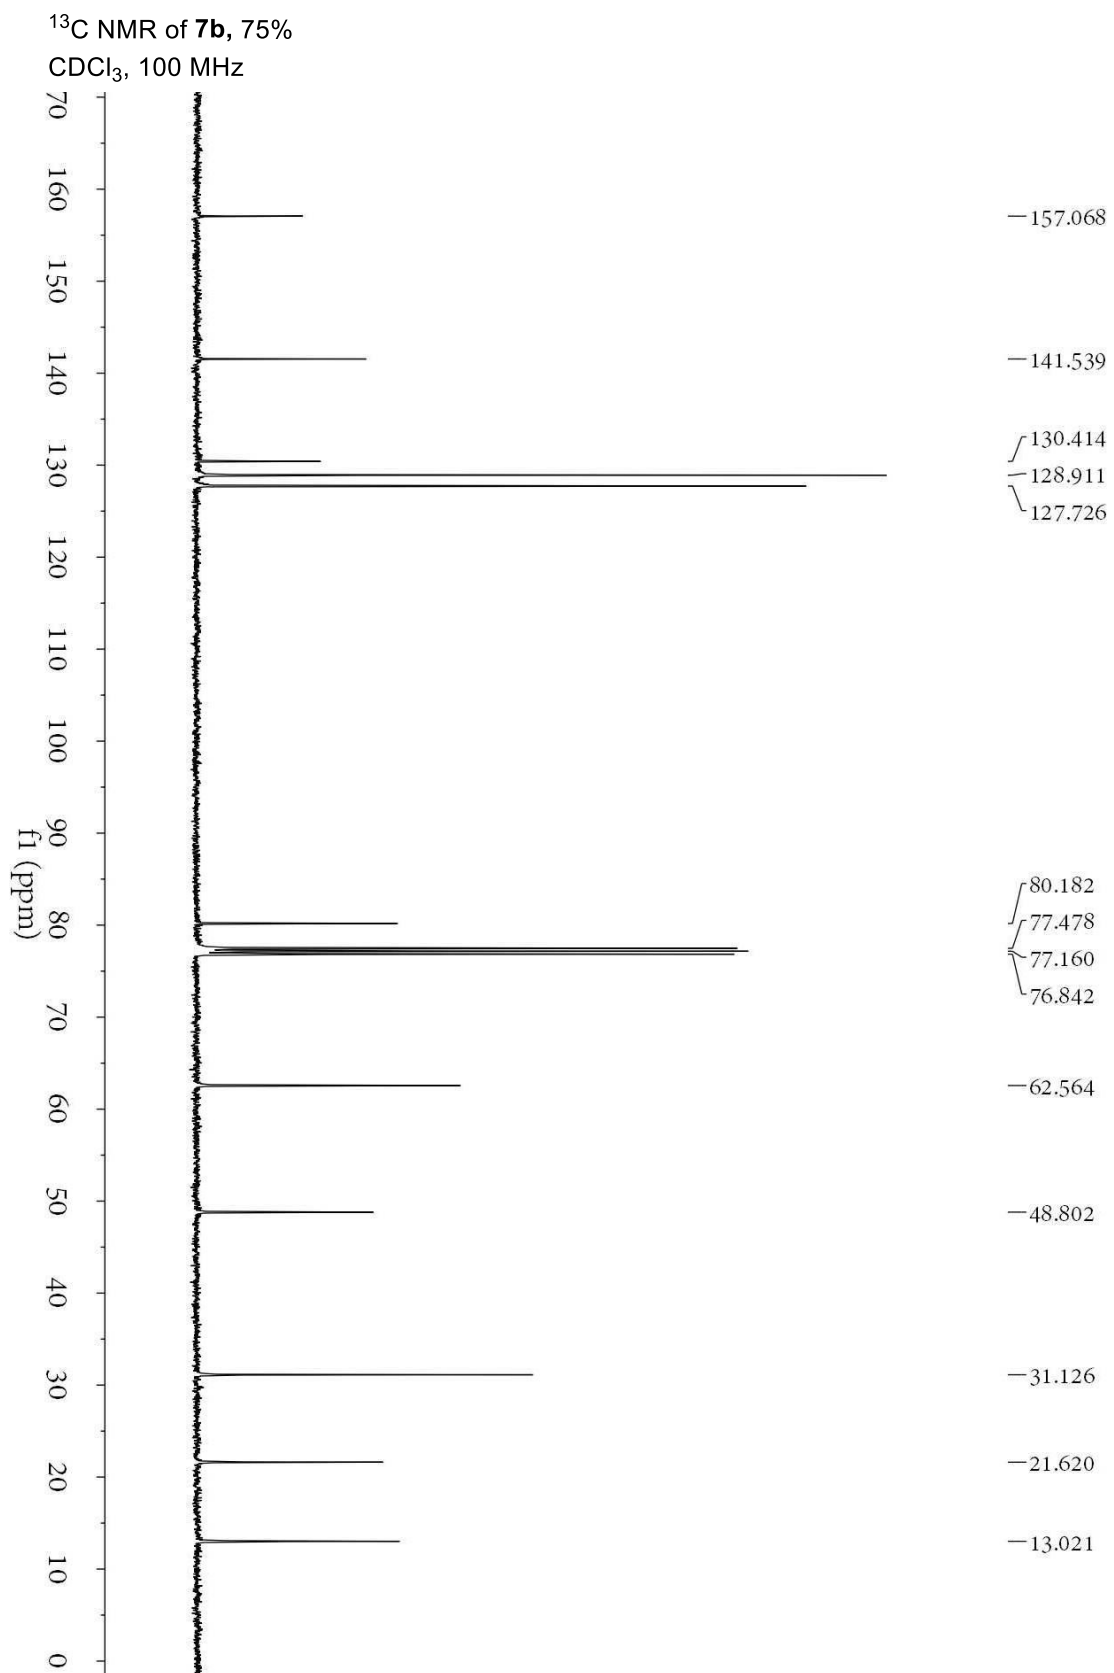

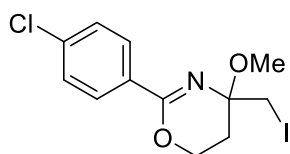

$^1\text{H}$  NMR of **7e**, 90%  
 $\text{CDCl}_3$ , 400 MHz

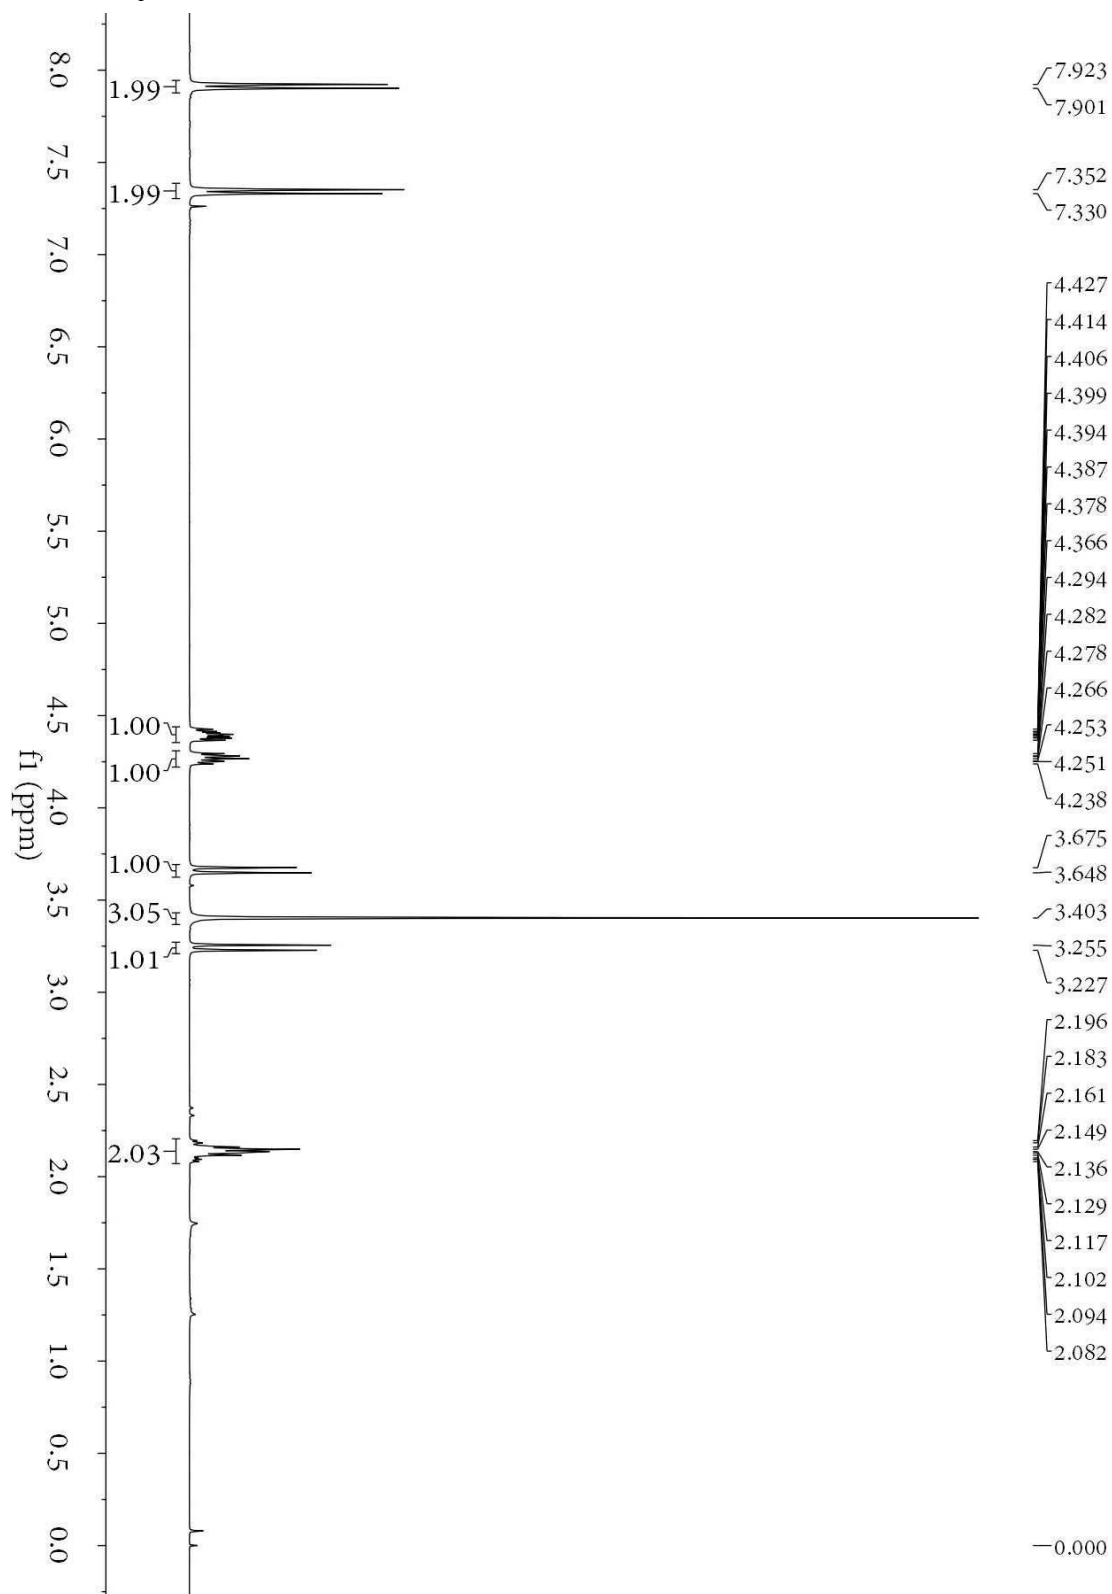

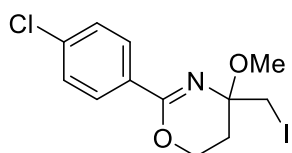

$^{13}\text{C}$  NMR of **7e**, 90%

$\text{CDCl}_3$ , 100 MHz

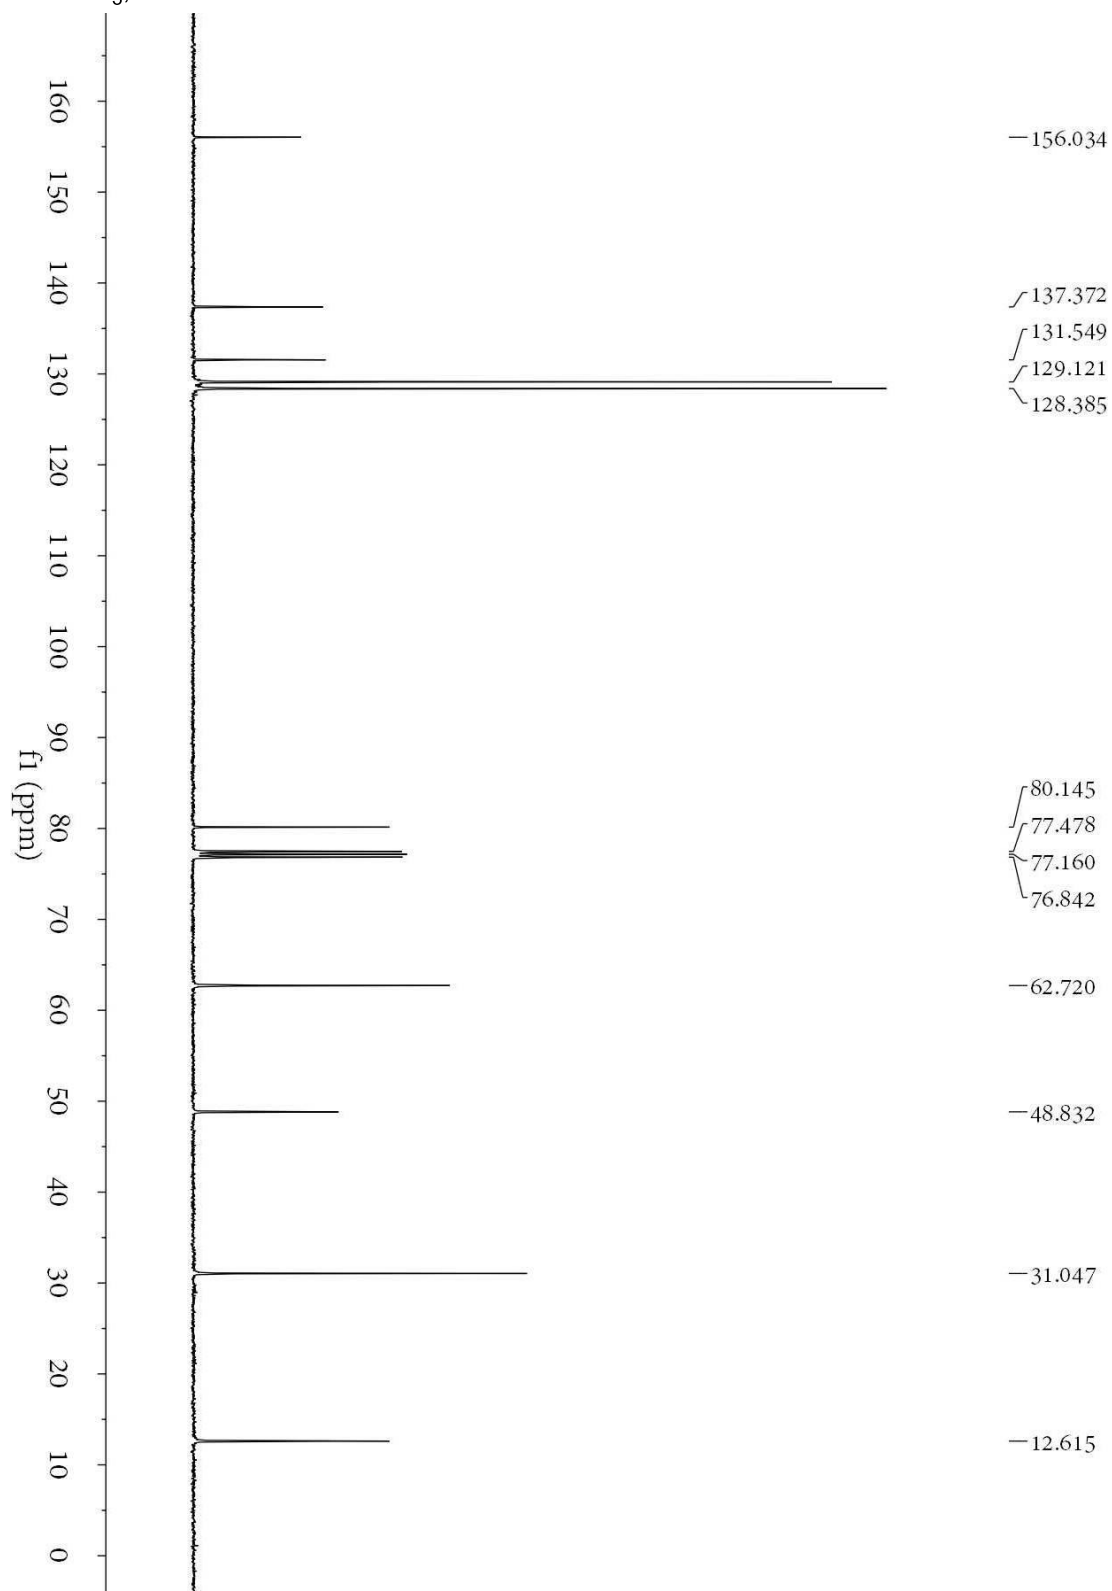

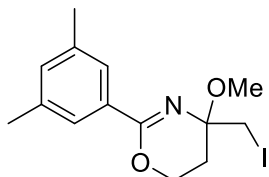

$^1\text{H}$  NMR of **71**, 41%  
 $\text{CDCl}_3$ , 400 MHz

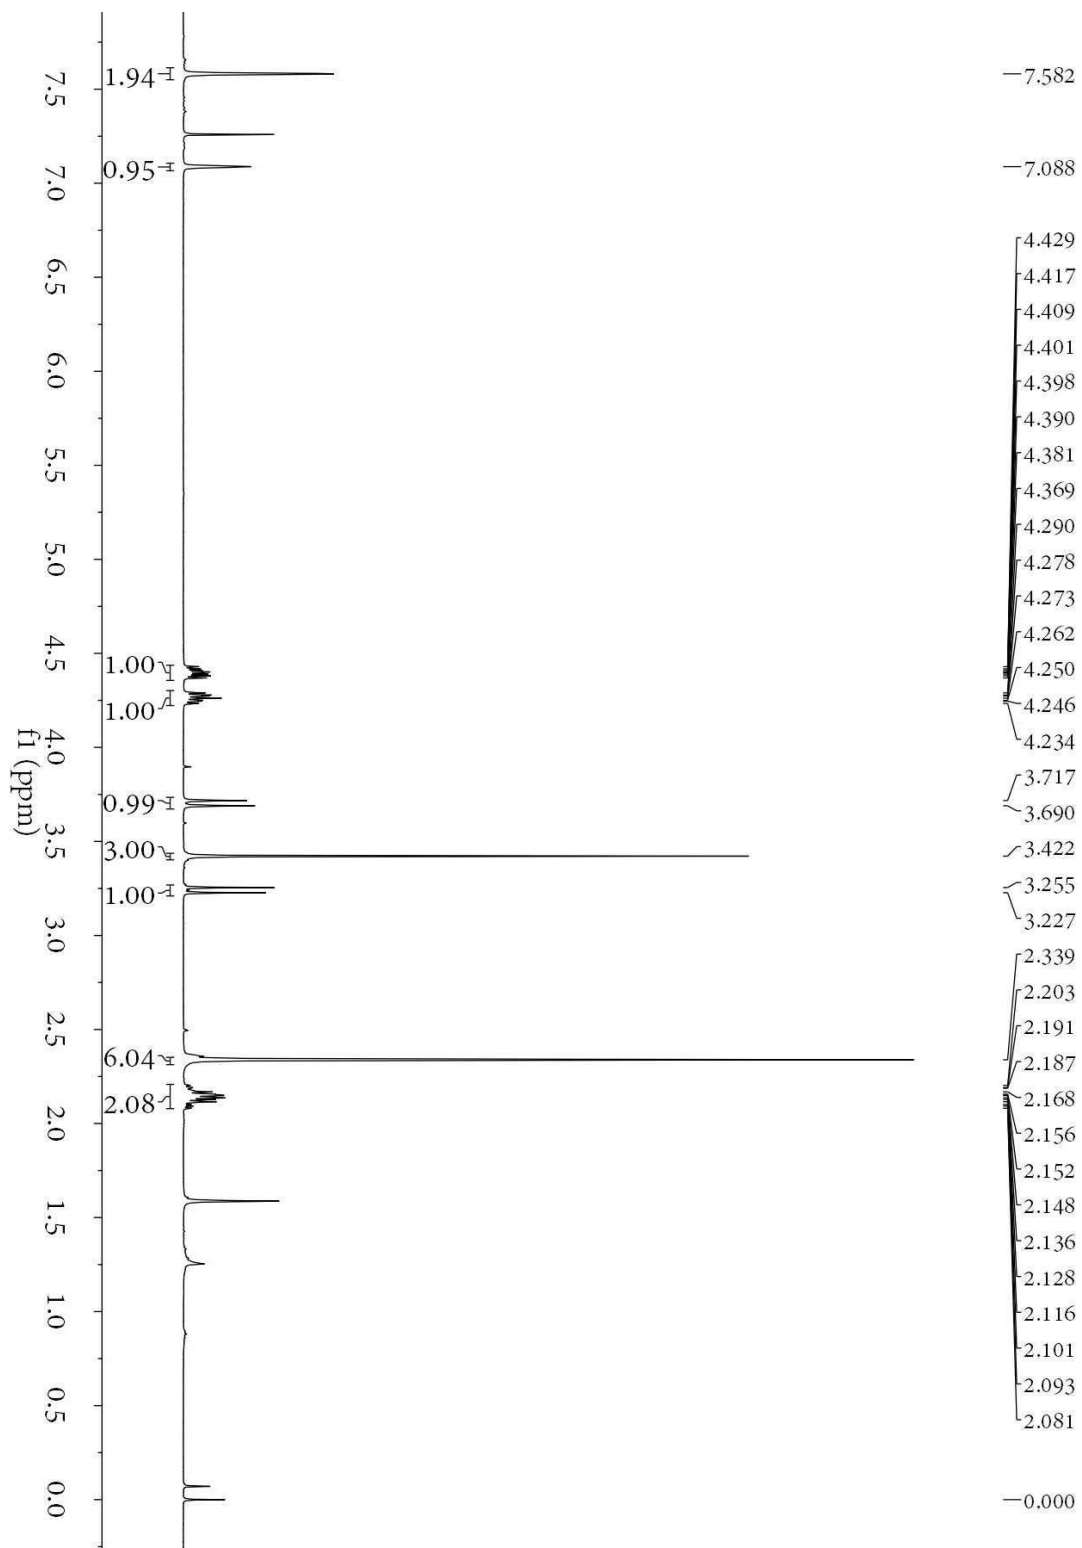

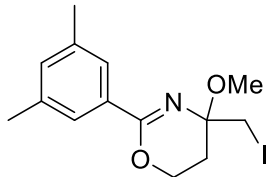

$^{13}\text{C}$  NMR of 7I, 41%  
 $\text{CDCl}_3$ , 100 MHz

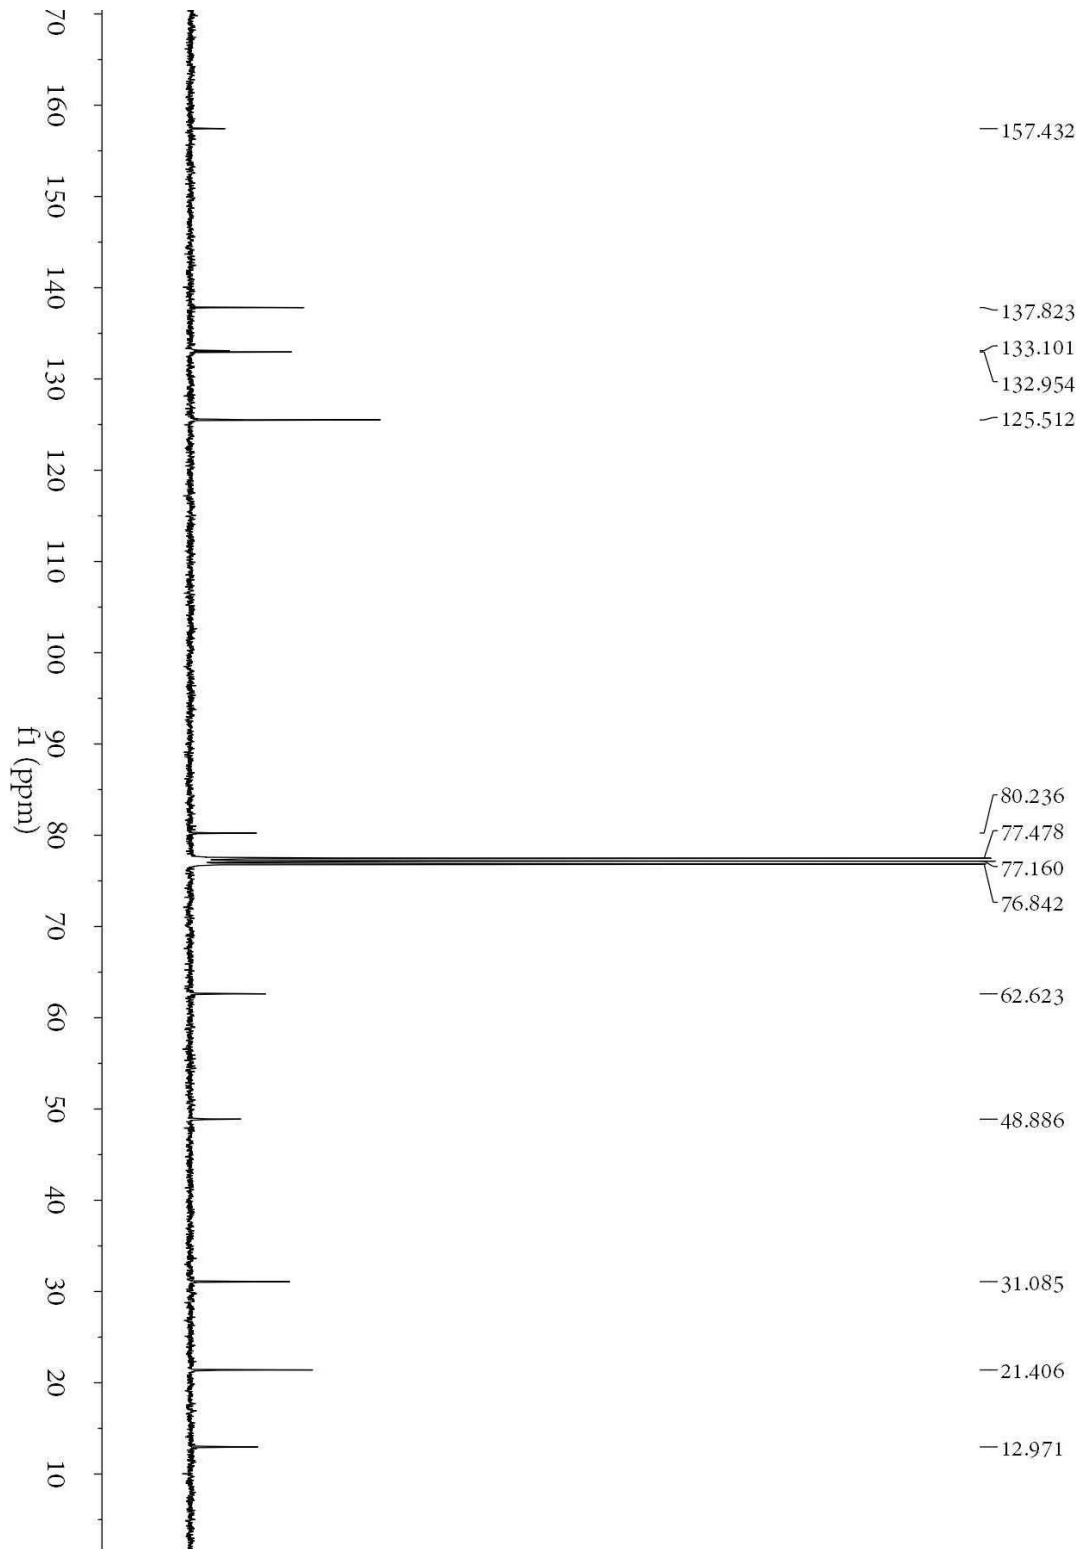

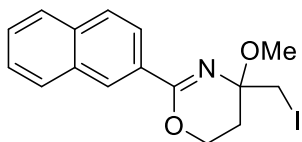

<sup>1</sup>H NMR of **7q**, 91%  
CDCl<sub>3</sub>, 400 MHz

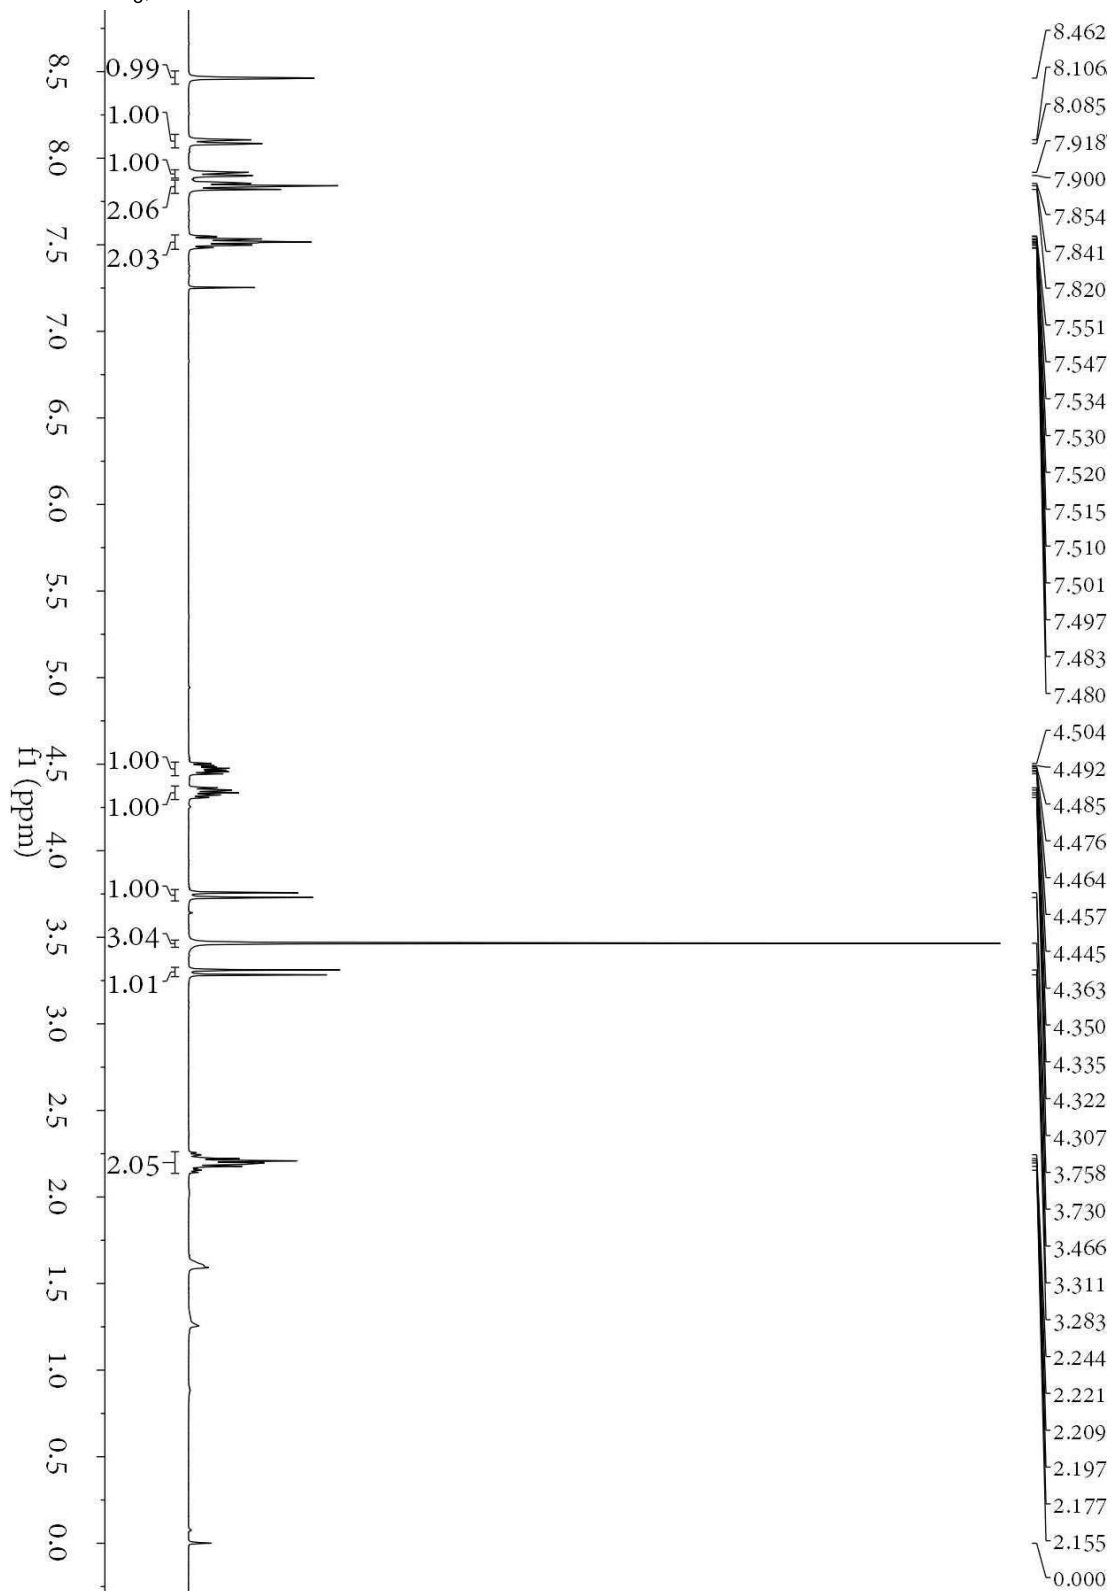

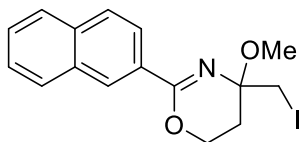

$^{13}\text{C}$  NMR of **7q**, 91%  
 $\text{CDCl}_3$ , 100 MHz

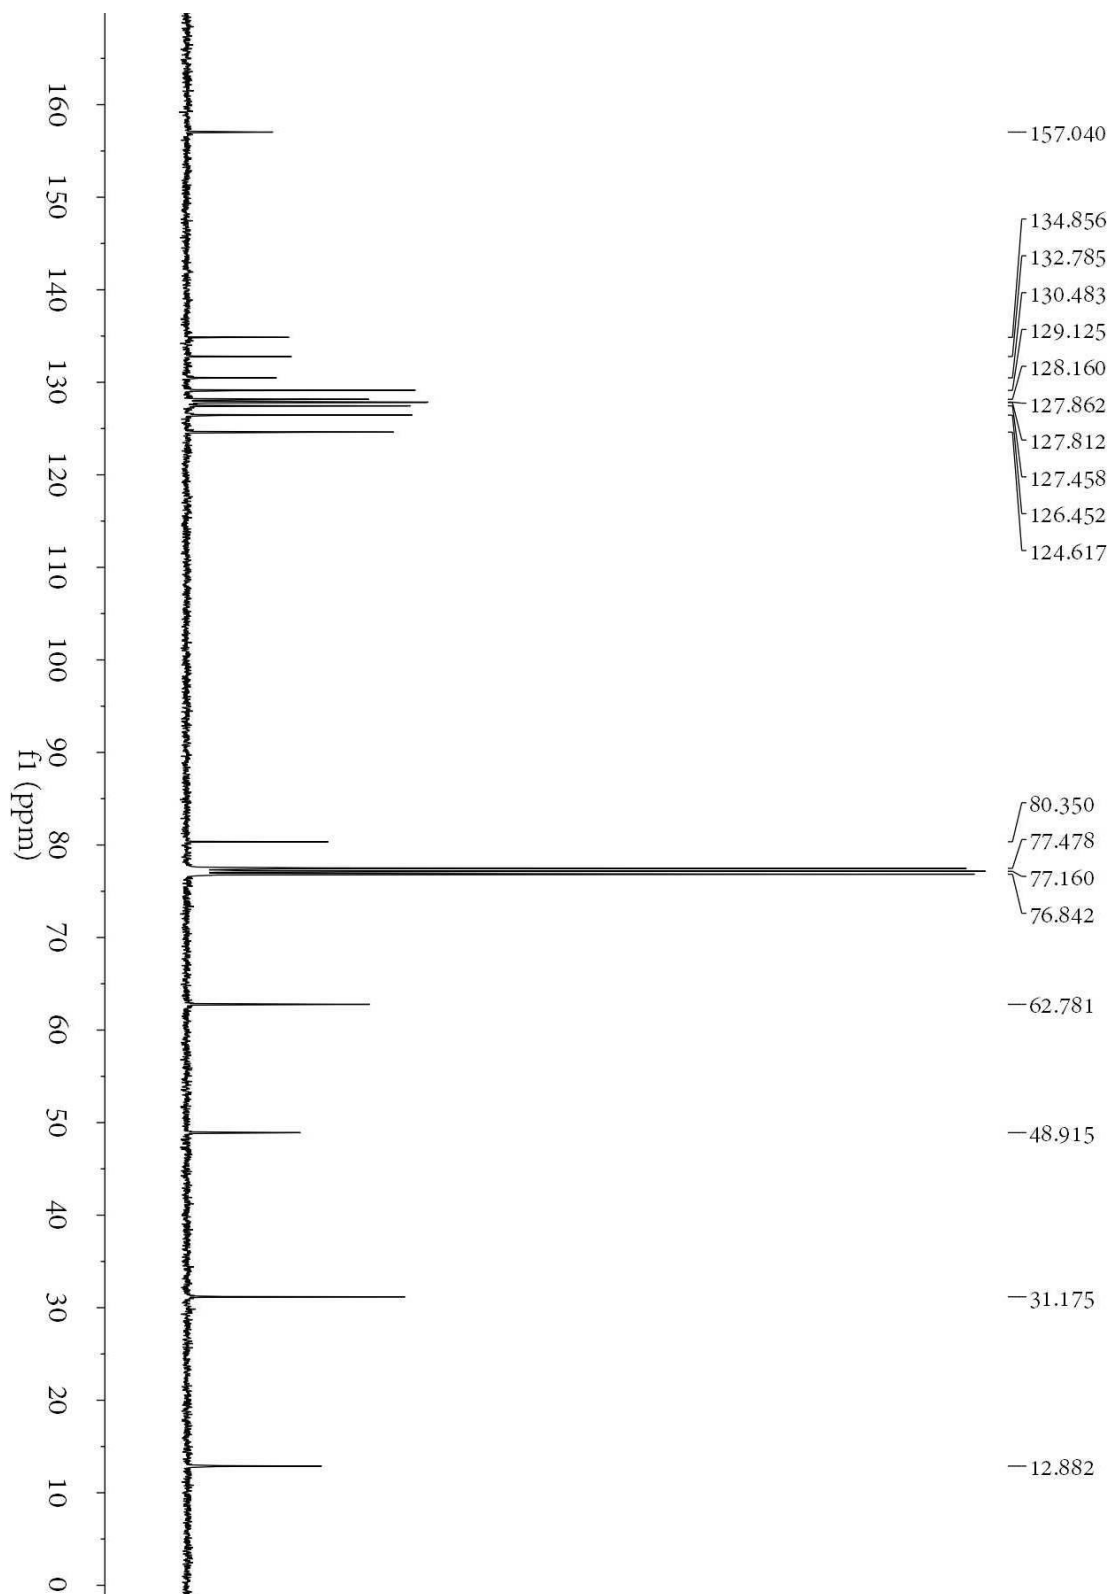



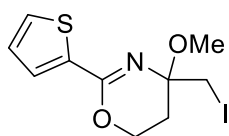

<sup>1</sup>H NMR of **7r**, 56%  
CDCl<sub>3</sub>, 400 MHz

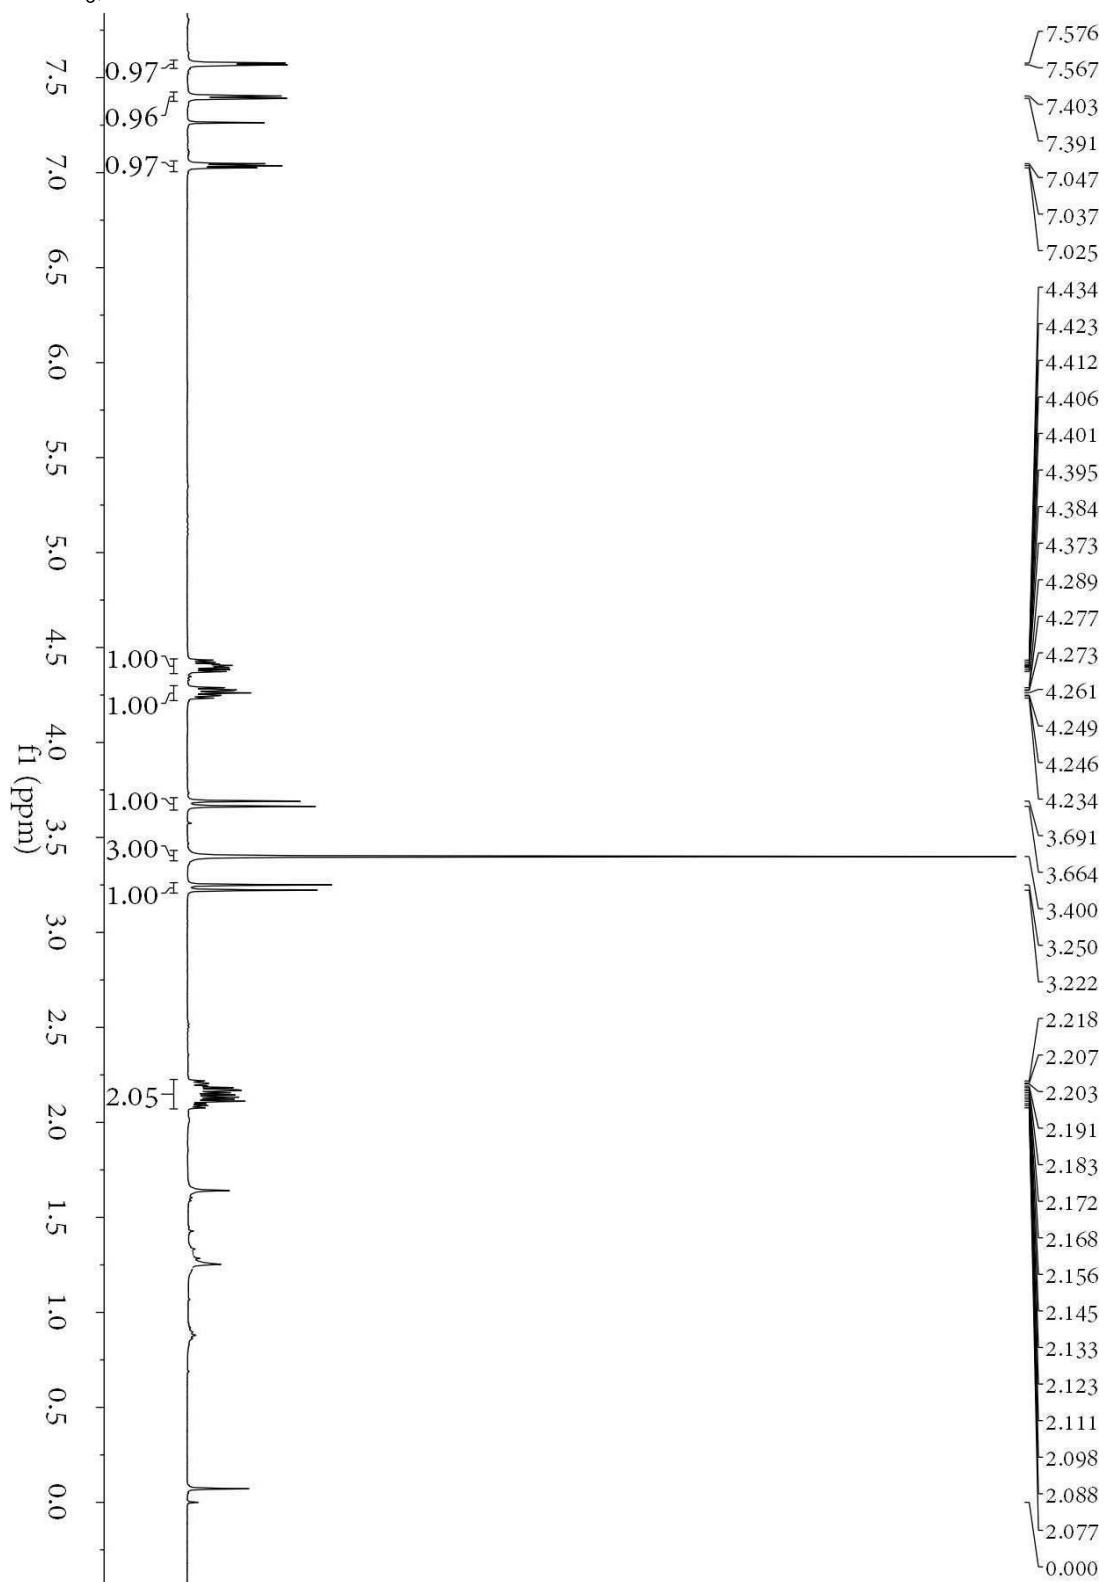

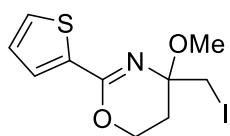

$^{13}\text{C}$  NMR of **7r**, 56%  
 $\text{CDCl}_3$ , 100 MHz

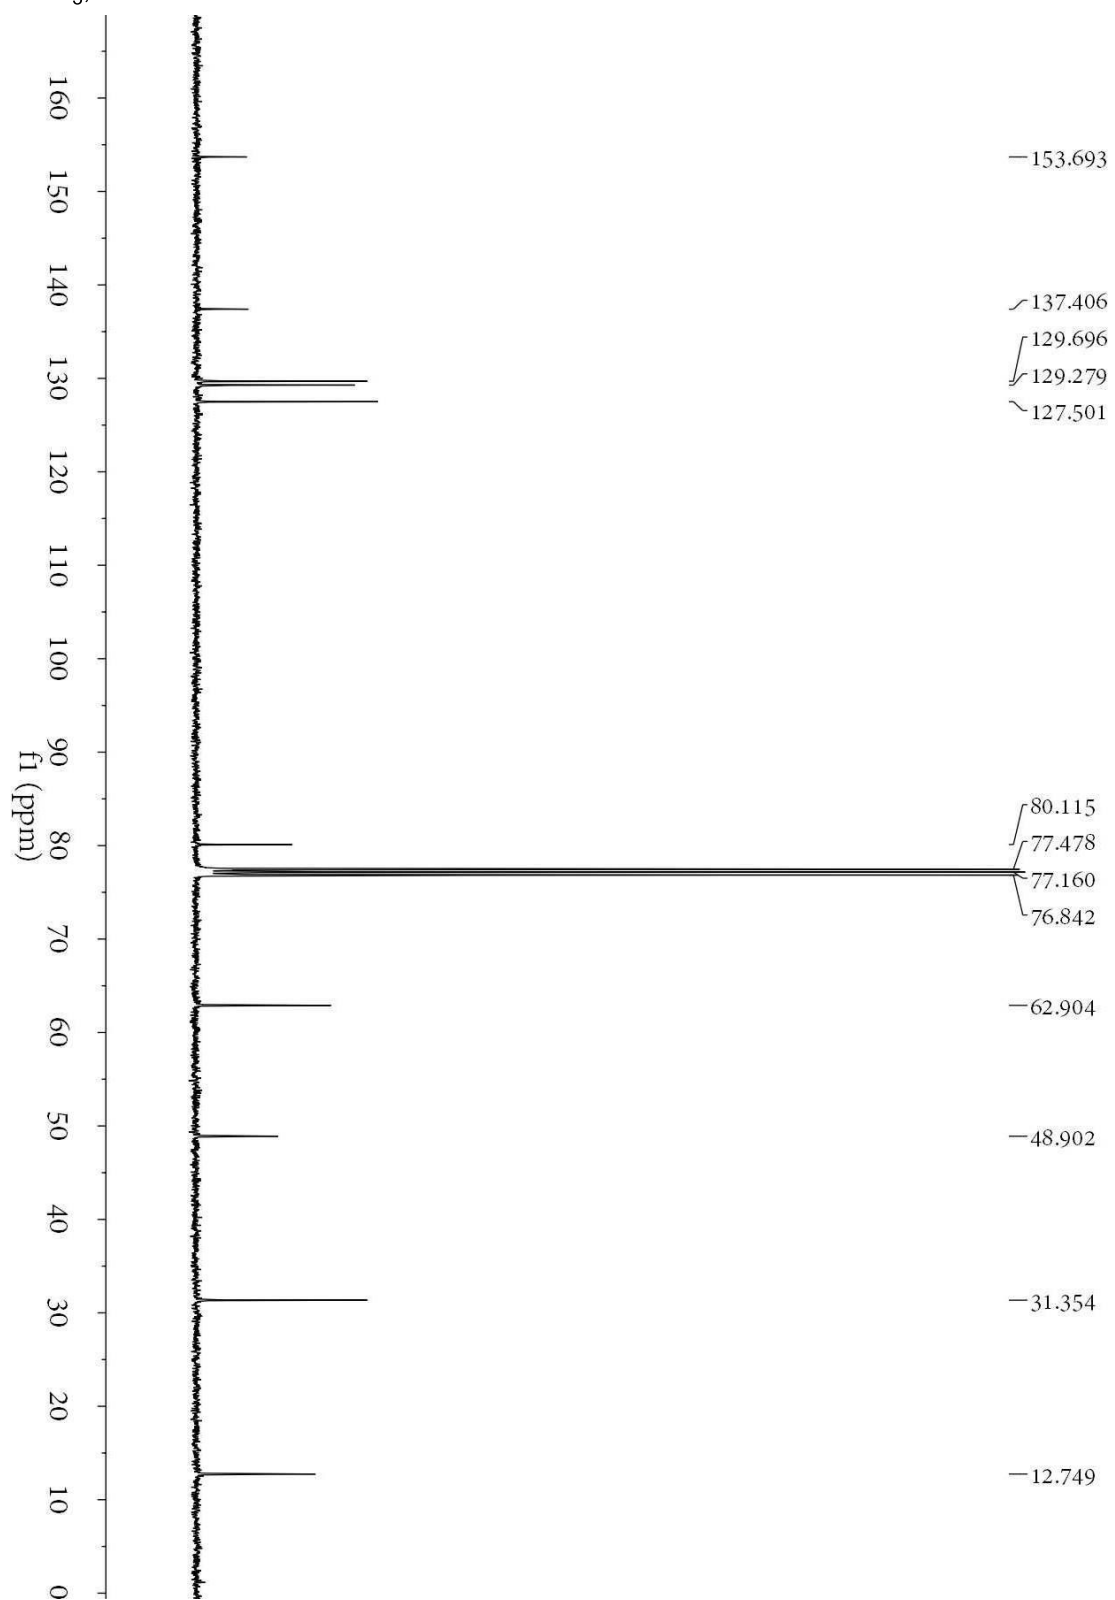

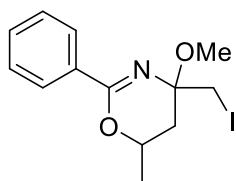

$^1\text{H}$  NMR of **7t** (mixture), 79%,  
*dr* = 5:1  $\text{CDCl}_3$ , 400 MHz

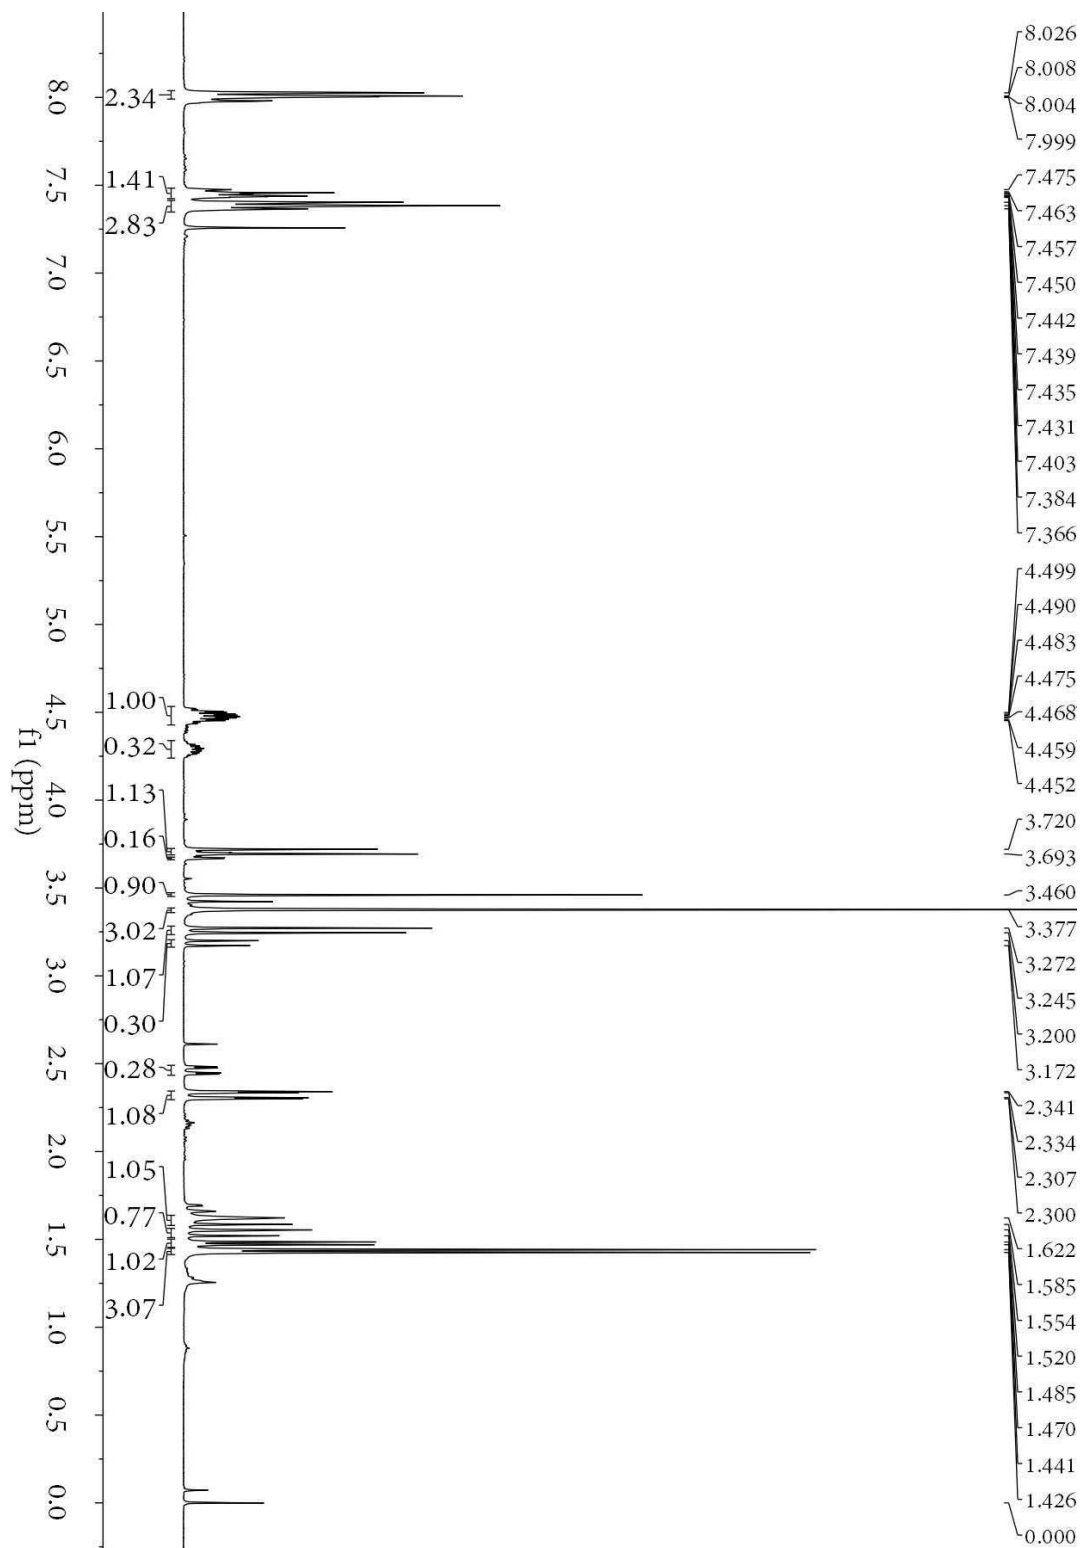

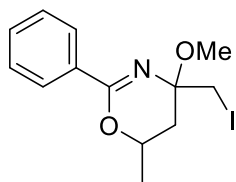

$^1\text{H}$  NMR of **7t** (pure mainly product), 79%,  
*dr* = 5:1  $\text{CDCl}_3$ , 400 MHz

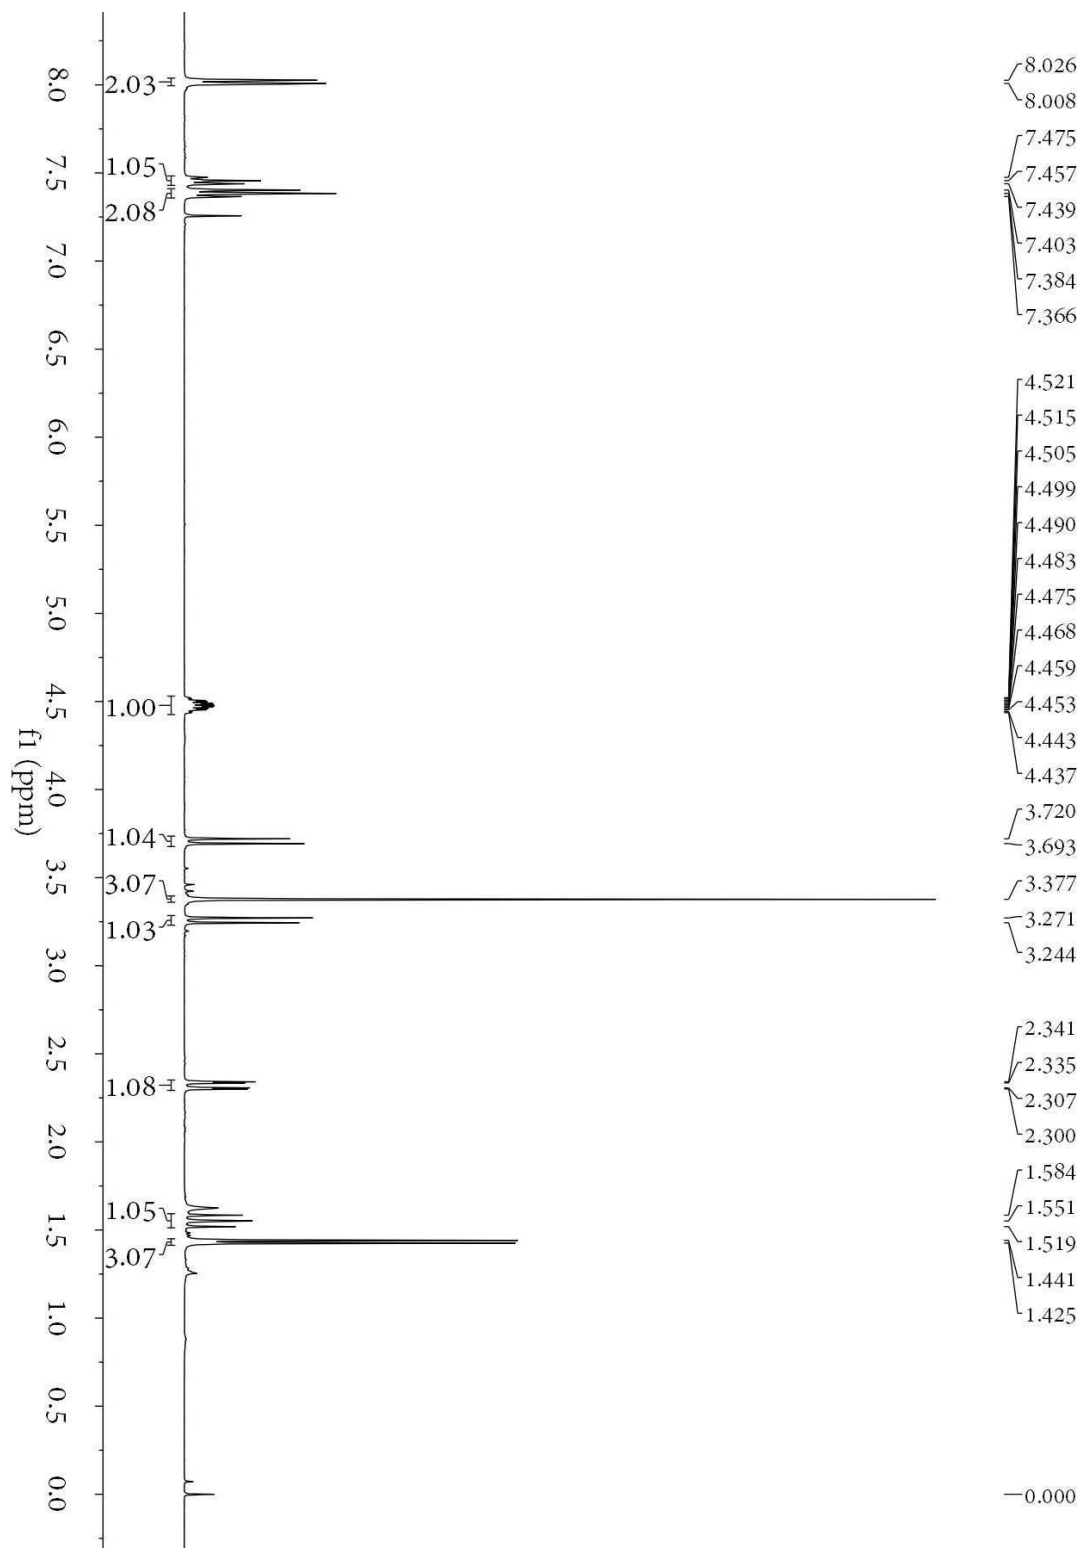

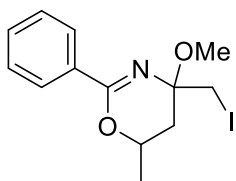

$^{13}\text{C}$  NMR of **7t** (pure mainly product), 79%,  
 $dr = 5:1$   $\text{CDCl}_3$ , 100 MHz

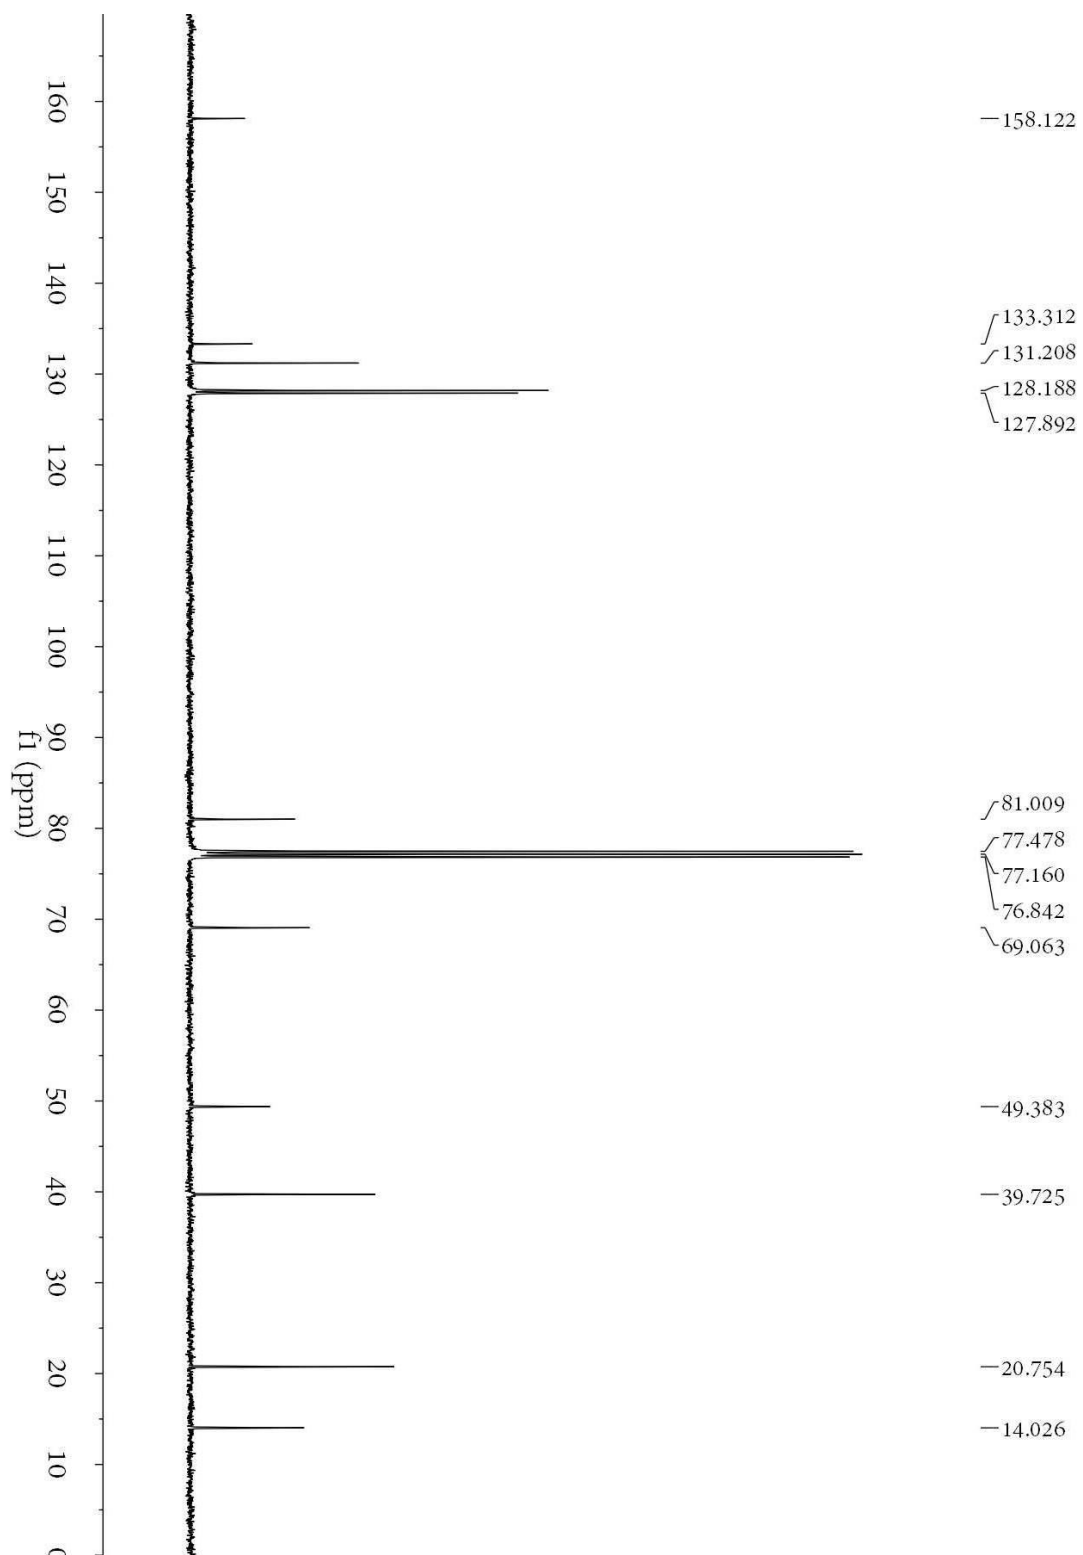

Supplement: d2qo01233b1.pdf [file d2qo01233b1.pdf]
